# Supplementary material for: Whole Brain White Matter Tract Deviation and Idiosyncrasy From Normative Development in Autism and ADHD and Unaffected Siblings Link With Dimensions of Psychopathology and Cognition
Source: Atypon-hosted journal article supplement (doi:10.1176/appi.ajp.2020.20070999), 2021-03-17
Supplement: appi.ajp.2020.20070999.ds001.pdf [file appi.ajp.2020.20070999.ds001.pdf]

# **Whole-brain white matter tracts deviation and idiosyncrasy from normative development in autism, ADHD and their unaffected siblings link with dimensions of psychopathology and cognition**

Yu-Hung Tung, M.D., Hsiang-Yuan Lin, M.D., Chang-Le Chen, M.Sc., Chi-Yung Shang, M.D., Ph.D., Li-Ying Yang, M.Sc., Yung-Chin Hsu, Ph.D., Wen-Yih Isaac Tseng, M.D., Ph.D., Susan Shur-Fen Gau, M.D., Ph.D.

## **Online Supplementary Materials**

|                                                                                                            |    |
|------------------------------------------------------------------------------------------------------------|----|
| <i>Supplementary Methods</i> .....                                                                         | 6  |
| a. Participants, Procedures, and Diagnosis .....                                                           | 6  |
| b. Symptom assessment .....                                                                                | 8  |
| c. Neuropsychological assessment .....                                                                     | 9  |
| d. Image acquisition.....                                                                                  | 10 |
| e. Image quality assurance .....                                                                           | 10 |
| f. Reconstruction of diffusion MRI data.....                                                               | 11 |
| g. White matter tract-specific analysis of diffusion indices.....                                          | 12 |
| h. Normative modeling .....                                                                                | 12 |
| i. Canonical correlation analysis .....                                                                    | 13 |
| j. Data distribution and the rationale for the appropriate statistical test selection .....                | 14 |
| <i>Supplementary Tables</i> .....                                                                          | 16 |
| Table S1. Atlas of 45 white-matter fiber tracts: tract names, connected brain regions, and references..... | 16 |
| Table S2. Comparison of normative models.....                                                              | 18 |
| Table S3. Conners' continuous performance test (CCPT). .....                                               | 23 |
| Table S4. Cambridge Neuropsychological Testing Automated Battery. ....                                     | 25 |
| Table S5. Child-adult comparison of people with ADHD and people with ASD.....                              | 28 |
| Table S6. Signal-to-noise (SNR) of the MRI machine used in the study.....                                  | 29 |
| Table S7. Clusters derived from symptom-based hierarchical clustering. ....                                | 30 |
| <i>Supplementary Figures</i> .....                                                                         | 32 |

|                                                                                                                                                                                                                    |           |
|--------------------------------------------------------------------------------------------------------------------------------------------------------------------------------------------------------------------|-----------|
| <b>Figure S1: SNR and Signal Dropout of DSI datasets. ....</b>                                                                                                                                                     | <b>32</b> |
| <b>Figure S2. Sex-specific normative models of white matter tracts relative to the age norm. ....</b>                                                                                                              | <b>33</b> |
| <b>Figure S3. Age distribution of normative models of white matter tracts.....</b>                                                                                                                                 | <b>34</b> |
| <b>Figure S4. Individualized white matter tract alteration (deviation) profiles. ....</b>                                                                                                                          | <b>35</b> |
| <b>Figure S5. SNR and signal dropout counts were plotted on the normative models. ....</b>                                                                                                                         | <b>37</b> |
| <b>Figure S6. The impact of image quality, SNR and signal dropout counts, on the results.....</b>                                                                                                                  | <b>38</b> |
| <b>Figure S7. GFA Z-score deviation profiles of people with attention-deficit/hyperactivity disorder, autism spectrum disorder, and their unaffected siblings. ....</b>                                            | <b>39</b> |
| <b>Figure S8. GFA Z-score deviation profiles of children and adults with attention-deficit/hyperactivity disorder or autism spectrum disorder. ....</b>                                                            | <b>40</b> |
| <b>Figure S9. Sex-specific GFA Z-score deviation profiles.....</b>                                                                                                                                                 | <b>41</b> |
| <b>Figure S10. GFA Z-score idiosyncrasy profiles of people with attention-deficit/hyperactivity disorder, autism spectrum disorder, and their unaffected siblings. ....</b>                                        | <b>42</b> |
| <b>Figure S11. GFA Z-score idiosyncrasy profiles of children and adults with attention-deficit/hyperactivity disorder or autism spectrum disorder. ....</b>                                                        | <b>43</b> |
| <b>Figure S12. The impact of image quality on the deviation pattern.....</b>                                                                                                                                       | <b>44</b> |
| <b>Figure S13. The impact of image quality on the idiosyncrasy pattern.....</b>                                                                                                                                    | <b>46</b> |
| <b>Figure S14. GFA Z-score deviation profiles of people with autism spectrum disorder with or without comorbid attention-deficit/hyperactivity disorder.....</b>                                                   | <b>48</b> |
| <b>Figure S15. GFA Z-score idiosyncrasy profiles of people with autism spectrum disorder with or without comorbid attention-deficit/hyperactivity disorder.....</b>                                                | <b>49</b> |
| <b>Figure S16. High correlation between people with autism spectrum disorder with or without comorbid attention-deficit/hyperactivity disorder in terms of GFA Z-score deviation and idiosyncrasy profile.....</b> | <b>50</b> |
| <b>Figure S17. Symptom-based clustering of probands and siblings.....</b>                                                                                                                                          | <b>51</b> |
| <b>Figure S18. Canonical correlation analysis (CCA) between GFA Z-scores and symptom assessment (2<sup>nd</sup> mode; 1<sup>st</sup> mode in Figure 3A).....</b>                                                   | <b>52</b> |
| <b>Figure S19. Canonical correlation analysis (CCA) between GFA Z-scores and neuropsychological assessment (the remaining 4 modes in addition to the 1<sup>st</sup> mode shown in Figure 3B).....</b>              | <b>53</b> |

|                                                                                                                                                                              |            |
|------------------------------------------------------------------------------------------------------------------------------------------------------------------------------|------------|
| <b>Figure S20. Permutation test of each mode in canonical correlation analysis. ....</b>                                                                                     | <b>54</b>  |
| <b>Figure S21. Diffusion indices Z-score profiles of people with attention-deficit/hyperactivity disorder, autism spectrum disorder, and their unaffected siblings. ....</b> | <b>55</b>  |
| <b>Figure S22. Diffusion Z-score profiles of children and adults with attention-deficit/hyperactivity disorder or autism spectrum disorder.....</b>                          | <b>58</b>  |
| <b>Figure S23. Sex-specific diffusion Z-score profiles. ....</b>                                                                                                             | <b>61</b>  |
| <b>Figure S24. Canonical correlation analysis (CCA) between diffusion Z-scores and symptom assessment .....</b>                                                              | <b>64</b>  |
| <b>Figure S25. Canonical correlation analysis (CCA) between diffusion indices Z-scores and neuropsychological assessment.....</b>                                            | <b>67</b>  |
| <b>Figure S26: Circos plots of brain-behavior relationships revealed by canonical correlation analysis (CCA). ....</b>                                                       | <b>71</b>  |
| <b>Figure S27: Circos plots of brain-function relationships revealed by canonical correlation analysis (CCA). ....</b>                                                       | <b>74</b>  |
| <b><i>Supplementary Results.....</i></b>                                                                                                                                     | <b>77</b>  |
| <b>Result S1-1: Mean deviation effect size of people with ADHD .....</b>                                                                                                     | <b>77</b>  |
| <b>Result S1-2: Mean deviation effect size of people with ASD.....</b>                                                                                                       | <b>79</b>  |
| <b>Result S1-3: Mean deviation effect size of siblings of people with ADHD.....</b>                                                                                          | <b>81</b>  |
| <b>Result S1-4: Mean deviation effect size of siblings of people with ASD.....</b>                                                                                           | <b>83</b>  |
| <b>Result S2-1: Mean deviation effect size of children with ADHD .....</b>                                                                                                   | <b>85</b>  |
| <b>Result S2-2: Mean deviation effect size of adults with ADHD.....</b>                                                                                                      | <b>87</b>  |
| <b>Result S2-3: Mean deviation effect size of children with ASD.....</b>                                                                                                     | <b>89</b>  |
| <b>Result S2-4: Mean deviation effect size of adults with ASD .....</b>                                                                                                      | <b>91</b>  |
| <b>Result S3-1: Mean deviation effect size of men and boys with ADHD.....</b>                                                                                                | <b>93</b>  |
| <b>Result S3-2: Mean deviation effect size of women and girls with ADHD .....</b>                                                                                            | <b>95</b>  |
| <b>Result S3-3: Mean deviation effect size of male siblings of people with ADHD.....</b>                                                                                     | <b>97</b>  |
| <b>Result S3-4: Mean deviation effect size of female siblings of people with ADHD.....</b>                                                                                   | <b>99</b>  |
| <b>Result S3-5: Mean deviation effect size of men and boys with ASD .....</b>                                                                                                | <b>101</b> |

|                                                                                                                    |            |
|--------------------------------------------------------------------------------------------------------------------|------------|
| <b>Result S3-6: Mean deviation effect size of women and girls with ASD.....</b>                                    | <b>103</b> |
| <b>Result S3-7: Mean deviation effect size of male siblings of people with ASD .....</b>                           | <b>105</b> |
| <b>Result S3-8: Mean deviation effect size of female siblings of people with ASD .....</b>                         | <b>107</b> |
| <b>Result S3-9: Mean deviation effect size of boys with ADHD .....</b>                                             | <b>109</b> |
| <b>Result S3-10: Mean deviation effect size of girls with ADHD.....</b>                                            | <b>111</b> |
| <b>Result S3-11: Mean deviation effect size of men with ADHD .....</b>                                             | <b>113</b> |
| <b>Result S3-12: Mean deviation effect size of women with ADHD .....</b>                                           | <b>115</b> |
| <b>Result S3-13: Mean deviation effect size of boys with ASD .....</b>                                             | <b>117</b> |
| <b>Result S3-14: Mean deviation effect size of girls with ASD .....</b>                                            | <b>119</b> |
| <b>Result S3-15: Mean deviation effect size of men with ASD.....</b>                                               | <b>121</b> |
| <b>Result S3-16: Mean deviation effect size of women with ASD.....</b>                                             | <b>123</b> |
| <b>Result S4-1: Idiosyncrasy of people with ADHD .....</b>                                                         | <b>125</b> |
| <b>Result S4-2: Idiosyncrasy of people with ASD .....</b>                                                          | <b>127</b> |
| <b>Result S4-3: Idiosyncrasy of siblings of people with ADHD .....</b>                                             | <b>129</b> |
| <b>Result S4-4: Idiosyncrasy of siblings of people with ASD.....</b>                                               | <b>131</b> |
| <b>Result S5-1: Idiosyncrasy of children with ADHD .....</b>                                                       | <b>133</b> |
| <b>Result S5-2: Idiosyncrasy of adults with ADHD.....</b>                                                          | <b>135</b> |
| <b>Result S5-3: Idiosyncrasy of children with ASD.....</b>                                                         | <b>137</b> |
| <b>Result S5-4: Idiosyncrasy of adults with ASD.....</b>                                                           | <b>139</b> |
| <b>Result S6-1: Mean deviation difference in people with ADHD and people with ASD.....</b>                         | <b>141</b> |
| <b>Result S6-2: Mean deviation difference in people with ADHD and siblings of people with ADHD</b>                 | <b>143</b> |
| <b>Result S6-3: Mean deviation difference in people with ASD and siblings of people with ASD</b>                   | <b>145</b> |
| <b>Result S6-4: Mean deviation difference in siblings of people with ADHD and siblings of people with ASD.....</b> | <b>147</b> |
| <b>Result S7-1: Mean deviation difference in children with ADHD and adults with ADHD.....</b>                      | <b>149</b> |
| <b>Result S7-2: Mean deviation difference in children with ASD and adults with ASD .....</b>                       | <b>151</b> |



|                                                                                                 |                   |
|-------------------------------------------------------------------------------------------------|-------------------|
| <b>Result S8-1: Mean deviation difference of sex in people with ADHD .....</b>                  | <b>153</b>        |
| <b>Result S8-2: Mean deviation difference of sex in people with ASD.....</b>                    | <b>155</b>        |
| <b>Result S9-1: Two-way ANOVA for diagnosis*age-group interactions. ....</b>                    | <b>157</b>        |
| <b>Result S9-2: Two-way ANOVA for diagnosis*sex interactions. ....</b>                          | <b>159</b>        |
| <b>Result S9-3: Three-way ANOVA for diagnosis*sex*age-group interactions. ....</b>              | <b>161</b>        |
| <b>Result S10: Spearman’s correlations of deviation profiles and idiosyncrasy profiles.....</b> | <b>163</b>        |
| <b><i>Supplementary Discussion.....</i></b>                                                     | <b><i>164</i></b> |
| <b>    The shared brain-symptom relationship (Figure 4A).....</b>                               | <b>164</b>        |
| <b>    The shared brain-cognition relationship (Figure 4B).....</b>                             | <b>164</b>        |
| <b><i>References .....</i></b>                                                                  | <b><i>166</i></b> |

## Supplementary Methods

### a. Participants, Procedures, and Diagnosis

People with attention-deficit hyperactivity disorder (ADHD) or autism spectrum disorder (ASD) and their unaffected siblings were recruited from the Department of Psychiatry at National Taiwan University Hospital, Taipei, Taiwan, from 2010 to 2018 (Table.1). All participants received clinical screenings and were diagnosed by senior child psychiatrists, who are experienced in mental health issues of neurodevelopmental disorders across the life span based on the DSM-IV-TR. In Taiwan, the system and culture of mental health services are somewhat different from those in North America, UK, and Europe. Namely, we do not have rigorous regulations on the patient's age limit, which is allowed to be seen by child psychiatrists. Therefore, a substantial proportion of patients, who had seen a child psychiatrist since childhood or adolescence, tend to be followed up by the same child psychiatrist if possible when they are grown up. Moreover, in Taiwan, not many adult psychiatrists, who did not have additional fellowship training in child and adolescent psychiatry, would feel confident to take care of patients diagnosed with neurodevelopmental disorders. As a result, a substantial proportion of patients diagnosed with neurodevelopmental disorders would be referred to psychiatrists who have received subspecialty training in child and adolescent psychiatry.

Their clinical diagnosis of ASD was confirmed by using the interviews with the Autism Diagnostic Observation Scale and Autism Diagnostic Interview-Revised (1) for ASD diagnosis. Notably, we did not further administer the Autism Diagnostic Observation Schedule, which is widely viewed as the gold standard for quantification of current ASD symptoms, at this cross-sectional study but at the follow-up study of this ASD cohort, an ongoing research. The diagnosis of ADHD and other mental health issues were confirmed by the Chinese version of the Kiddie-Schedule for Affective Disorders and Schizophrenia-Epidemiologic Version (*K-SADS-E*) (2) for ADHD and other psychiatric diagnoses. Three individuals with ADHD and 32 individuals with ASD were noted to take medication (mainly methylphenidate, 3 took antidepressant) 3 months before or at the time of the MRI scan, respectively. We excluded people with histories of other psychiatric disorders, intellectual disabilities, substance-induced psychotic disorders, or substance abuse. ASD-related symptoms were assessed with parent's reports of Autism Spectrum Quotient (AQ) (3) and Social Responsiveness Scale (SRS) (4). ADHD-related symptoms were evaluated with parents' reports of Swanson, Nolan, and Pelham, Version IV Scale (SNAP-IV) (5). Details of the Autism Spectrum Quotient and SNAP-IV are presented in the next section. To assess attention and cognitive functions, we used the neuropsychological test of Conners' continuous performance test (CCPT) (6) and the Cambridge Neuropsychological Test Automated Battery (CANTAB) (7), respectively.

Details are provided in the neuropsychological assessment section. Typically developing controls for developing normative models were recruited from schools by teachers' referrals, and the community by using posters as well as Internet advertising. All typically developing controls were first clinically evaluated by psychiatrists, then the K-SADS-E (2) were administered for youths, and Diagnostic Interview for Genetic Studies (8) were administered to adults. They were confirmed to be free of mental illnesses, intellectual disability, substance abuse, neurological disorders, major systemic disorders, and family histories of psychiatric disorders. The intellectual function was assessed by the Wechsler Intelligence Scale for Children-Third Edition (WISC-III) for participants under age 16 years or by the Wechsler Adult Intelligence Scale-Third Edition (WAIS-III) for those aged above 16 years. For comparison between children and adults, each participant under age 16 years are included in children group, and those aged above 16 years are included in adult group (Table S5). The reasons of selecting 16 years as a cutoff are because Wechsler intelligence scale, autism spectrum quotient (9, 10), and ADHD diagnostic criteria in DSM-5 (11) set 16 years old to divide children and adults. The study was approved by the Research Ethics Committee of National Taiwan University Hospital, Taipei, Taiwan, and informed consent was obtained from all participants.

### ***K-SADS-E***

The K-SADS-E is a semi-structured interview scale for the systematic assessment of mental disorders in children and adolescents. The development of the Chinese K-SADS-E was completed by the Child Psychiatry Research Group in Taiwan (12). This included a two-stage translation and modification of several items with psycholinguistic equivalents relevant to the Taiwanese culture and further modification to meet the DSM-IV diagnostic criteria (2). Previous studies have shown that the Chinese K-SADS-E is a reliable and valid instrument to assess DSM-IV child and adolescent psychiatric disorders (2) and has been extensively used in a variety of clinical studies, e.g., clinical (13), epidemiological (14), neuropsychological (15), and neuroimage (16) investigations. The K-SADS-E interview training has been described in detail elsewhere (17).

### ***ADI-R***

ADI-R (18) is a standard, comprehensive, semi-structured interview for child's caregivers and administered by well-trained interviewers. The ADI-R is designed to interview caregivers of children with mental ages, reaching 18 months into adulthood. The caregivers were asked to recall the child's current performance and the performance when the child was 4-5 years old. The coding of some items is converted to numeric scores "0" if no evidence of abnormality exists, "1" if some evidence of abnormality exists, and "2" if evidence of marked abnormality. Higher scores mean more severe clinical deficits. The algorithm focuses on three domains, which are based on ICD-10 and DSM-IV diagnostic criteria, including reciprocal social interaction, verbal and non-verbal

communication, and restricted, repetitive and stereotyped patterns of behaviors. The Chinese version of the ADI-R, translated into Chinese by Gau and colleagues (1, 4, 19), has been approved by Western Psychological Services in 2007, and widely used in ASD research (20-40) in Taiwan.

## **b. Symptom assessment**

### *Autism Spectrum Quotient*

The Autism Spectrum Quotient is a 50-item questionnaire originally designed to assess autistic traits in adults with normal intelligence (10); versions for assessing adolescents (9) and children (41) have been developed with similar structures for completion by a parent. The Autism Spectrum Quotient consists of the five subscales of social skills, communication, attention-switching, attention to detail, and imagination (10). The Autism Spectrum Quotient was prepared with culture-relevant colloquial expressions, and two-way translation was performed after obtaining permission. The translation has a good test and retest reliability and is therapeutically informative and robust to cultural differences (3). Each statement is rated on a four-point scale, with answer categories “definitely agree”, “slightly agree”, “slightly disagree” and “definitely disagree”. Respondents rate to what extent they agree or disagree with each of the statements on a four-point scale (1=definitely disagree, 4=definitely agree) for items portraying autistic features and inverted for the reversal items, where a higher score depicts the autistic end of the continuum (42-44). Therefore, the total score of the Autism Spectrum Quotient ranges from 50 to 200. The scale of the Autism Spectrum Quotient scores could be converted to the original dichotomous scale. Every response that indicates the autistic feature is scored ‘1’ if “definitely agree” or “slightly agree”, and otherwise ‘0’ if “slightly disagree” or “definitely disagree” leading to the total score of the Autism Spectrum Quotient ranges from 0 to 50 where higher score depicts the autistic end of the continuum. However, to obtain a better approximate of continuous distribution to quantify autistic traits, we employed an ordinal (4-point Likert) scale (ranging from 1 to 4 for items portraying autistic feature, and inverted for the reversal items) (42-44) instead of the original dichotomous scale for responses to the Autism Spectrum Quotient. It has been widely used in ASD studies in Taiwan and some ethnic Chinese populations (37, 45-48).

### *SNAP-IV*

SNAP-IV (49) consists of the DSM-IV symptoms for inattention and hyperactivity/ impulsivity ADHD criteria as well as oppositional symptoms in oppositional defiant disorder. The 26-item SNAP-IV was prepared with culture-specific colloquial expressions and underwent a two-way translation. It demonstrated high test-retest reliability, internal consistency, and discriminant validity (5). The norm and psychometric properties of the parent (50) and teacher reports (51) on

the Chinese version of the SNAP-IV have been established in Taiwan. The Chinese SNAP-IV has been widely used in clinical and research settings in Taiwan regarding treatment studies (52-54), epidemiological studies (29, 30, 47, 50, 51, 55), and clinical studies (16, 34, 47, 56-64).

### ***SRS***

The SRS is a 65-item rating scale with 4-point Likert-type questionnaire (65). It is a parent-scored tool for autistic symptom assessment, including social communication, social cognition, social motivation, social awareness, and autistic mannerisms. The cross-cultural validity and convergent validity with the Autism Diagnostic Observation Schedule, as well as the Autism Diagnostic Interview-Revised, were well-confirmed (65, 66). The Chinese version of SRS has been well established with a stable 4-factor structure of psychometric properties, including social communication, social awareness, social emotion, and unique mannerism (4).

## **c. Neuropsychological assessment**

### ***Conners' CPT***

Conners' CPT (6, 67) is a visual-motor task that evaluates attention problems in participants aged 6 years or older. The 14-minute computer test requires tapping the spacebar when any character except "X" appears on the screen. The test contains 6 blocks, each with 3 subblocks containing 20 letter presentations, for a total of 360 trials. The subblocks differ in interstimulus intervals of 1, 2, and 4 seconds, which occur randomly. The assessment includes detectability (the ability to distinguish targets from nontargets), hit reaction time (mean response speed), omission errors (missed targets), and commission errors (false positive responses to nontargets). The complete list is presented in Table S3.

### ***CANTAB***

CANTAB is a computerized neuropsychological assessment battery that includes measures of working memory, planning, motor skills, visual attention, and visual memory. All tasks are nonverbal, including delayed matching to sample, motor screening, pattern recognition memory, paired-associates learning, and spatial recognition memory. The complete list is presented in Table S4. CANTAB has high validity for assessing the brain-behavior relationship in adults (68-70) and neuropsychological function in pediatric populations (7, 71, 72). This battery can be used without modification to assess cognitive functions in people aged 4–90 years (7).

#### **d. Image acquisition**

Magnetic resonance imaging (MRI) was performed on the same MRI machine with a 3-Tesla MRI system (TIM Trio, Siemens, Erlangen, Germany) with a 32-channel phased-array head coil. The most recent major software and hardware update was in 2009, which was before this study began. MRI images were acquired from 2010 to 2018. The quality of MRI images is stable across years (Table S8). Diffusion-weighted imaging was acquired using a single-shot spin-echo echo-planar imaging sequence with twice-refocused diffusion-sensitive gradients to reduce distortion caused by eddy currents (73). The diffusion acquisition scheme was performed in accordance with optimal diffusion spectrum imaging (DSI) protocol at 3T, which used 102 diffusion-encoding directions with a maximal b value of  $4000 \text{ s/mm}^2$ , corresponding to 102 Cartesian grid points in the diffusion-encoding space or q-space (74). The diffusion-weighted images were acquired with the following imaging parameters: repetition time (TR)/echo time (TE) = 9600 ms/130 ms, field of view (FOV) =  $200 \times 200 \text{ mm}^2$ , flip angle =  $90^\circ$ , matrix =  $80 \times 80$ , number of slices = 56, slice thickness = 2.5 mm. The total scanning time was within 20 minutes. T1-weighted images were acquired using a three-dimensional magnetization-prepared rapid gradient-echo sequence with the following parameters: TR/TE = 2000 ms/3 ms, flip angle =  $9^\circ$ , FOV =  $256 \times 192 \times 208 \text{ mm}^3$ , and matrix =  $256 \times 192 \times 208$ .

#### **e. Image quality assurance**

Image quality control (Figure S1, S5, S6, S12, S13) is vital before analysis to prevent spurious results and false conclusions. One of the most crucial sources of signal dropout is head motion during image acquisition that causes spurious group differences (75). For long-range motion (i.e., between-volume motion) correction, each diffusion-weighted image was first spatially registered to the base image ( $b = 0$ ) with linear affine transformation. For short-range motion (i.e., within-volume motion), we postulate that in the presence of strong diffusion-sensitive gradients, especially those with high b-values, a sudden head motion within a TR period mainly manifests in the signal loss in the diffusion-weighted images. Thus, dealing with the signal dropout induced by the head motion can be regarded as part of our quality control procedure of motion artifact in diffusion MRI. Also, during the scan, all participants lied on the examination table with a head surrounded by expandable foam cushions to restrict movements. Furthermore, DSI data sets were discarded if they had more than 60 slices with signal dropout (60 slices correspond to 1% of slices in  $102 \text{ gradient} \times 58$ ), a proxy of in-scanner motion. The QA criterion of the DWI signal dropout is defined as to discard the data of subjects whose DWI data sets are with more than 60 wrecked slices. The reason behind the criterion based on the slices instead of volumes is that the signal drop usually occurs randomly over a participant's entire data set, seldom limited within several volumes. Additionally, even though the signal drop only occurs in slices of few volumes, we still tended to

exclude this subject to get rid of any unexpected bias, which might confound the subsequent results. As a result, all images included in this study are guaranteed with high SNR and less than 60 wrecked slices. Eddy current is detrimental to diffusion imaging quality, and echo-planar imaging sequence is particularly susceptible due to long readout times. To minimize the effect of eddy current, which is induced by gradient switch, we utilized the twice-refocused spin-echo sequence, which has been proven to greatly reduce eddy distortion compared with the Stejskal-Tanner spin echo sequence (73). The diffusion gradient is split into two smaller sets of bipolar lobes, with the radiofrequency refocusing pulses dividing each bipolar pair. Thus, the initial and final ramps cancel each other out in close temporal proximity (76). In addition, diffusion data sets with signal-to-noise ratios (SNRs) of less than 20 were discarded. The SNR was calculated as the ratio of the mean signal in the center of the image to the standard deviation of the background signal and was corrected with a factor derived from the Rayleigh distribution (77). Diffusion MRI images in this study are acquired from a single MRI machine from 2010 to 2018. There was no software update during this period, and the SNR was stable in each year (Table S6). Taken together, the artifact induced by motion or eddy current in the diffusion-weighted images was minimized in this study. Consequently, MRI data of 58 people with ASD and 27 of their siblings, 183 people with ADHD and 14 of their siblings, as well as 96 people of typically developed controls were discarded because of unsatisfactory image quality, and these participants were thus excluded from the further analyses. After image quality assessment, 281 people with ADHD and 124 of their siblings and 175 people with ASD and 72 of their siblings were included in the study (Table 1).

## **f. Reconstruction of diffusion MRI data**

We used the mean apparent propagator (MAP)-MRI algorithm (78-80) to calculate diffusion indices for each individual. The algorithm describes the magnetic resonance signals in the q-space in terms of a linear combination of Hermite functions, which form an orthonormal and complete basis to approximate all types of diffusion signal profiles. MAP-MRI is an extension of diffusion tensor imaging (DTI) because zero-order Hermite functions are Gaussian functions. By contrast, higher-order terms, which are orthogonal corrections to the Gaussian approximation, account for the non-Gaussian components of diffusion signals. In addition, the Fourier transforms of Hermite functions are Hermite functions. Therefore, the diffusion propagator and orientation distribution function could be easily reconstructed from the coefficients, which were estimated by fitting the diffusion signals with Hermite functions. By using the orientation distribution function, we calculated the generalized fractional anisotropy (GFA) (81), which is analogous to the fractional anisotropy in DTI. GFA was calculated with MAP models (78, 80), whereas conventional diffusion indices, mean diffusivity (MD), radial diffusivity (RD), and axial diffusivity (AD) were

calculated using the DTI model. GFA, MD, RD, and AD, represent the diffusion profiles, namely white matter microstructural properties, of each white matter tract. These indices have strong relationships with microstructural properties, as evidenced by mouse demyelination models and ex vivo and postmortem human brain histology studies (82, 83). In brief, a decreased GFA is considered to be associated with impaired microstructural integrity of white matter fibers, but the marker is nonspecific and should be supplemented by other diffusion indices (82, 83). MD increases with reduced axon density and is an inverse measure of membrane density. RD increases with demyelination or dysmyelination. AD decreases with acute axonal injury but becomes unclear in the chronic and repair stages (82-85). Therefore, GFA, MD, RD, and AD were regarded as surrogate markers indicating different microstructural properties of white-matter tracts.

### **g. White matter tract-specific analysis of diffusion indices**

The white matter tract-specific analysis was performed to sample the diffusion indices from 45 predefined major fiber tract bundles over the whole brain. For the DSI dataset, the 45 major white matter tracts (Table S1) were built in an open-sourced DSI template (86) through deterministic streamline-based tractography (87) with multiple regions of interest defined in the automated anatomical labeling atlas (88). The sampling coordinates of the 45 tracts (Table S1) were transformed from the template to individual DSI datasets with the corresponding deformation maps. The deformation maps were obtained through two-step registration, which included anatomical information provided by the T1-weighted images (89) and microstructural information provided by DSI datasets (86). The sampling coordinates were aligned with the proceeding direction of each fiber tract bundle, and diffusion indices were sampled in the native space along the sampling coordinates normalized and divided into 100 steps. Finally, for each participant, we obtained a 3D array (1-axis: 100 steps along with sampling coordinates; 2-axis: 45 white matter tract bundles; 3-axis: diffusion indices). The axis of 100 steps of the array was then averaged to obtain a matrix (1-axis: 45 white matter tract bundles; 2-axis: diffusion indices) (90-92). In this study, the primary interest is GFA, and other diffusivity measures, MD, RD, and AD, were included in the supplementary analysis.

### **h. Normative modeling**

We utilized moving averages to obtain unbiased mean and variance estimates of diffusion indices in each age range from the 626 typically developed control cohort (Male/Female: 376/250; age: 5-



40/20.16±8.5yrs). Normative models for each diffusion indices (GFA, MD, RD, AD) of 45 main tracts (Table S1) were developed separately for men and women (Figure S2). The age-range window was between 1 and 5 years, depending on data point density. We used a minimum of 30 data points to derive means and standard deviations. Diffusion indices for each participant were transformed into Z-scores, resulting in individualized tract-alteration profiles (Figure S3). The Z-scores were statistically free of age or sex confounders; there was neither a significant correlation between Z-scores and age nor a difference in sex after statistical testing for typically developed controls. There was also no correlation between Z-scores and image quality, assessed by SNR and signal dropout counts (Figure S5&6). The moving average method was compared with other approaches, including linear, quadratic, Gaussian process regression (GPR) with a radial basis function kernel, GPR with a Matern kernel, and locally weighted scatterplot smoothing. Each model was fitted for people without ADHD or ASD with 10-fold cross-validation, and the average  $R^2$  and root mean square errors (RMSEs) of white matter tracts were acquired (Table S2A). Because no theoretical evidence has been presented regarding how GFA or other diffusion indices change with age, we used the nonparametric estimation of normative models. In addition, our moving average approach had the most suitable fit, according to  $R^2$  (Table S2B) and RMSE (Table S2C) in nearly every white matter tract. Statistical analysis and visualization were performed using Python packages (93-99) and R software libraries (100).

### **i. Canonical correlation analysis**

The multivariate analyses of brain-behavior relationships were done with canonical correlation analysis (CCA), which considers the fact that multiple variables actually interact with one another. CCA identifies “modes” of population covariation between diffusion indices and clinical measures (101); each mode includes a linear combination of tract diffusion indices and a discrete combination of non-imaging measures with the highest correlations. The relative “importance” of each original variable in a mode is reflected by the canonical loadings (Figure 4, Figure S18 & S19), which is the linear correlation between the canonical variate and the original variables in this set. The canonical loading shows the relative contribution of each variable in deriving the canonical variate, reflecting the variance that the observed variable shares with the canonical variate. The derived modes, or canonical variates, are orthogonal to each other, reflecting a multi-dimensional brain-behavior relationship. The CCA analysis was done by R package “CCA” and “CCP” (102-104). The first part of the analysis illustrates the relationship between tract GFA Z-score and behavioral measures, including Autism Spectrum Quotient, SRS, and SNAP IV (Figure 3A). Because these questionnaires were not available for all the participants, so the subjects included in the analysis were 354 (ADHD: 71, ADHD sibling: 47, ASD: 167; ASD sibling: 69).

The second part of the analysis demonstrates the association between tract GFA Z-score and neuropsychological tests, including CANTAB (Table S4) and CCPT (Table S3) (Figure 3B). Again, not all the participants received CANTAB and CCPT, so the final analysis included 595 participants (ADHD: 273, ADHD sibling: 117; ASD: 142; ASD sibling: 63). Each significant mode ( $p < 0.05$ ;  $\text{Corr} > 0.4$ ) accounts for orthogonal dimensions of relationship. To investigate which variable contributes most to the canonical variate, variables with large loadings (with cutoffs of  $\pm 0.2$ ) were selected (Figure 4) for interpretations. There is currently no consensus on the cutoff threshold for the definition of “large loadings.” For additional analysis, MD Z-score, RD Z-score, and AD Z-score was respectively correlated with symptom scores and neuropsychological tests (Figure S24-27). As each index represents distinct histological changes (82-85), these additional analyses provide different white matter tract markers indicating different aspects of the brain-behavior relationship.

**j. Data distribution and the rationale for the appropriate statistical test selection**

The central limit theorem has established that when independent random variables (independent and identically distributed (i.i.d.) random variables) are sampled, their normalized sum, aka sampling distributions, tends toward a normal distribution even if the original variables themselves are not normally distributed. Practically, sample sizes equal to or greater than 30 are considered sufficient for the central limit theorem to hold. Thus, for clinical group except for girls with ASD, have sample size larger than 30, so the “sampling distribution” approximate normal distribution regardless of whether white matter tract data (GFA Z-score) are normally distributed, making parametric test (t-test) the best choice in contrast to non-parametric test (ex. Mann-Whitney test). For girls with ASD (n=17), we applied the Kolmogorov-Smirnov test, and no white matter tracts showed GFA Z-scores that deviate from the normal distribution. Thus, the sampling distribution approximates normal distribution, and t-test is the best choice. Thus, we derive a deviation pattern with a one-sample t-test to check if GFA Z-score mean deviated significantly from zero and idiosyncrasy pattern with F-test to check if GFA Z-score variance deviated significantly from the normal population.

| Clinical group | Sex    | N   | Central limit theorem |
|----------------|--------|-----|-----------------------|
| ADHD           | Male   | 205 | V                     |
| ADHD           | Female | 74  | V                     |
| ADHD siblings  | Male   | 56  | V                     |
| ADHD siblings  | Female | 65  | V                     |
| ASD            | Male   | 158 | V                     |

|              |        |    |                                                  |
|--------------|--------|----|--------------------------------------------------|
| ASD          | Female | 17 | Normal distribution<br>(Kolmogorov-Smirnov test) |
| ASD siblings | Male   | 38 | V                                                |
| ASD siblings | Female | 34 | V                                                |

The derived deviation pattern and idiosyncrasy pattern consist of effect size and F-ratio of each white matter tract for each clinical group, respectively. Deviation patterns (or idiosyncrasy pattern) contain 45 values, which correspond to 45 white matter tracts. For example, Result S1-1 includes deviation pattern of people with ADHD. The p-value for each tract is the statistical significance of a one-sample t-test of “whether people with ADHD present GFA Z-score deviated from zero” for each tract. The null hypothesis is “people with ADHD present GFA Z-score at average 0”, aka no difference from the norm. The test is done “separately” for each tract, with the testing space of 45 tracts, and with the correction for multiple comparisons. The derived “effect size,” or Cohen’s d, of 45 tracts constitute the deviation pattern for average ADHD. This deviation pattern could be thought of as sampling the GFA-Z score from the average ADHD brain in the predefined 45 region-of-interest (ROI), rather than sampling from people with ADHD.

Thus, those values were not independent of each other, and the central limit theorem does not apply. Recall that the prerequisite is to draw a sequence of independent and identically distributed (i.i.d.) random variables. Clearly, neither the deviation pattern nor the idiosyncrasy pattern of 45 tracts conforms to this prerequisite. Thus, we need to specifically test for the normality of deviation and idiosyncrasy. After applying the Kolmogorov-Smirnov test, all of the patterns deviate significantly from the normal distributions for each clinical group. Thus, using Spearman’s correlation would be more appropriate than Pearson’s correlation.

## Supplementary Tables

**Table S1. Atlas of 45 white-matter fiber tracts: tract names, connected brain regions, and references.**

| Tract Name                                        | Abbrev. | ROI 1                          | ROI 2                            |
|---------------------------------------------------|---------|--------------------------------|----------------------------------|
| <b>Association tracts</b>                         |         |                                |                                  |
| Arcuate Fasciculus (105)                          | AF      | Inferior frontal gyrus (VLPFC) | Superior temporal gyrus          |
| Superior Longitudinal Fasciculus I (106, 107)     | SLF1    | Superior parietal lobe         | Superior frontal gyrus           |
| Superior Longitudinal Fasciculus II (106, 107)    | SLF2    | Angular gyrus                  | DLPFC                            |
| Superior Longitudinal Fasciculus III (106, 107)   | SLF3    | Supramarginal gyrus            | Pars opercularis                 |
| Frontal Aslant Tract (108)                        | FAT     | Supplementary motor area       | Inferior frontal gyrus           |
| Perpendicular Fasciculus (109)                    | PF      | Angular gyrus                  | Fusiform, inferior temporal      |
| Cingulum, body (110)                              | CGB     | Cingulate gyrus (anterior)     | Cingulate gyrus (posterior)      |
| Cingulum, Hippocampus (110)                       | CGH     | Cingulate gyrus (posterior)    | Hippocampus                      |
| Fornix (111)                                      | FX      | Mammillary body                | hippocampus                      |
| Stria Terminalis (112)                            | ST      | Septal nuclei                  | Amygdala                         |
| Uncinate Fasciculus (113, 114)                    | UF      | Orbitofrontal gyrus            | Superior temporal pole           |
| Inferior Fronto-Occipital Fasciculus (115)        | IFOF    | Orbitofrontal gyrus            | Occipital lobe                   |
| Inferior Longitudinal Fasciculus (116)            | ILF     | Temporal gyrus                 | Occipital lobe                   |
| <b>Projection tracts</b>                          |         |                                |                                  |
| Frontostriatal circuit (Prefrontal) (117)         | FS_PFC  | Prefrontal cortex              | Rostral caudate nucleus, putamen |
| Frontostriatal circuit (Motor) (117)              | FS_M    | premotor, motor                | Putamen                          |
| Thalamocortical Radiation (Prefrontal) (118, 119) | TR_PFC  | Thalamus                       | Prefrontal cortex                |

|                                                        |           |                           |                                     |
|--------------------------------------------------------|-----------|---------------------------|-------------------------------------|
| Thalamocortical Radiation (Sensorimotor) (118, 119)    | TR_SM     | Thalamus                  | Postcentral gyrus, precentral gyrus |
| Thalamocortical Radiation (Auditory) (118, 119)        | TR_aud    | Medial geniculate body    | Heschl's gyrus                      |
| Thalamocortical Radiation (Optic Radiation) (118, 119) | TR_opt    | Lateral geniculate body   | Visual cortex                       |
| Corticospinal Tract (118)                              | CST       | Primary motor cortex      | Brainstem                           |
| <b>Corpus callosum</b>                                 |           |                           |                                     |
| Corpus callosum (genu; Prefrontal) (118)               | CC_PFC    | Prefrontal cortex         | Prefrontal cortex                   |
| Corpus callosum (Sensorimotor) (118)                   | CC_SM     | Sensorimotor cortex       | Sensorimotor cortex                 |
| Corpus callosum (Parietal) (118)                       | CC_pariet | Posterior Parietal cortex | Posterior Parietal cortex           |
| Corpus callosum (Temporal) (118)                       | CC_temp   | Temporal cortex           | Temporal cortex                     |
| Corpus callosum (Splenium; Occipital) (118)            | CC_splen  | Visual cortex             | Visual cortex                       |

**Table S2. Comparison of normative models.**

(A) The whole-brain average summary score of  $R^2$ , root mean square error (RMSE), and mean square error for several normative model methods, including our moving average method (Moving\_Avg), linear and quadratic methods, Gaussian process regression (GPR) with radial basis function kernel (GPR\_RBF), GPR with Matern kernel (GPR\_Matern), and locally weighted scatterplot smoothing (LOWESS). Moving average models are the fittest, with the highest  $R^2$ , lower RMSE, and MSE. All the evaluation metrics were acquired for each white matter tracts and averaged to get a whole-brain average summary score.

|            | $R^2$    | MSE      | RMSE     |
|------------|----------|----------|----------|
| Moving_Avg | 2.45E-01 | 8.64E-04 | 2.88E-02 |
| Linear     | 4.73E-02 | 1.08E-03 | 3.23E-02 |
| Quadratic  | 2.22E-01 | 8.92E-04 | 2.92E-02 |
| GPR_RBF    | 1.84E-01 | 9.35E-04 | 3.00E-02 |
| GPR_Matern | 2.17E-01 | 8.96E-04 | 2.93E-02 |
| LOWESS     | 2.13E-01 | 9.01E-04 | 2.94E-02 |

(B)  $R^2$  of 45 tracts for each model. Moving average presents the highest  $R^2$  in nearly every white matter tract. LOWESS model, quadratic model, and GPR model with Matern kernel (GPR\_Matern) also perform well. The linear model fits worse with the data.

| tract  | Moving_Avg | Linear   | Quadratic | GPR_RBF  | GPR_Matern | LOWESS   |
|--------|------------|----------|-----------|----------|------------|----------|
| AF_L   | 3.11E-01   | 3.26E-03 | 2.76E-01  | 2.11E-01 | 2.76E-01   | 2.60E-01 |
| AF_R   | 2.67E-01   | 3.69E-03 | 2.35E-01  | 1.79E-01 | 2.33E-01   | 2.18E-01 |
| SLF1_L | 2.21E-01   | 1.22E-02 | 1.84E-01  | 1.61E-01 | 1.95E-01   | 1.97E-01 |
| SLF1_R | 2.23E-01   | 3.57E-02 | 2.21E-01  | 1.90E-01 | 2.20E-01   | 1.92E-01 |
| SLF2_L | 2.64E-01   | 2.58E-02 | 2.31E-01  | 1.79E-01 | 2.25E-01   | 2.08E-01 |
| SLF2_R | 2.41E-01   | 2.44E-02 | 1.88E-01  | 1.53E-01 | 1.94E-01   | 1.95E-01 |
| SLF3_L | 2.52E-01   | 2.39E-02 | 2.21E-01  | 1.72E-01 | 2.16E-01   | 1.98E-01 |
| SLF3_R | 1.92E-01   | 3.83E-02 | 1.50E-01  | 1.22E-01 | 1.49E-01   | 1.49E-01 |
| FAT_L  | 2.49E-01   | 6.10E-03 | 2.31E-01  | 1.78E-01 | 2.27E-01   | 2.09E-01 |
| FAT_R  | 2.56E-01   | 1.28E-01 | 2.46E-01  | 2.22E-01 | 2.37E-01   | 2.34E-01 |
| PF_L   | 1.43E-01   | 1.82E-03 | 1.17E-01  | 8.77E-02 | 1.10E-01   | 1.18E-01 |
| PF_R   | 1.38E-01   | 2.81E-04 | 1.19E-01  | 9.07E-02 | 1.11E-01   | 1.12E-01 |
| CGB_L  | 2.38E-01   | 1.01E-01 | 2.01E-01  | 1.80E-01 | 2.10E-01   | 2.22E-01 |

|                  |          |          |          |          |          |          |
|------------------|----------|----------|----------|----------|----------|----------|
| <b>CGB_R</b>     | 3.23E-01 | 1.72E-01 | 2.92E-01 | 2.64E-01 | 2.93E-01 | 2.94E-01 |
| <b>CGH_L</b>     | 3.69E-01 | 1.17E-01 | 3.20E-01 | 2.51E-01 | 3.12E-01 | 3.32E-01 |
| <b>CGH_R</b>     | 3.45E-01 | 6.49E-02 | 2.75E-01 | 2.23E-01 | 2.84E-01 | 3.01E-01 |
| <b>FX_L</b>      | 3.06E-01 | 2.68E-01 | 3.05E-01 | 2.96E-01 | 2.94E-01 | 3.03E-01 |
| <b>FX_R</b>      | 3.43E-01 | 2.09E-01 | 3.33E-01 | 3.11E-01 | 3.28E-01 | 3.28E-01 |
| <b>ST_L</b>      | 1.71E-01 | 1.50E-01 | 1.77E-01 | 1.61E-01 | 1.47E-01 | 1.73E-01 |
| <b>ST_R</b>      | 4.72E-02 | 2.82E-02 | 5.89E-02 | 4.44E-02 | 3.05E-02 | 5.80E-02 |
| <b>UF_L</b>      | 2.08E-01 | 5.34E-03 | 1.60E-01 | 1.17E-01 | 1.59E-01 | 1.80E-01 |
| <b>UF_R</b>      | 1.89E-01 | 2.61E-03 | 1.64E-01 | 1.19E-01 | 1.56E-01 | 1.63E-01 |
| <b>IFOF_L</b>    | 3.47E-01 | 5.04E-03 | 3.13E-01 | 2.40E-01 | 3.12E-01 | 2.83E-01 |
| <b>IFOF_R</b>    | 3.28E-01 | 2.88E-04 | 3.04E-01 | 2.30E-01 | 2.98E-01 | 2.77E-01 |
| <b>ILF_L</b>     | 5.50E-02 | 2.25E-04 | 4.54E-02 | 3.96E-02 | 4.31E-02 | 4.47E-02 |
| <b>ILF_R</b>     | 6.74E-02 | 1.55E-04 | 3.70E-02 | 3.32E-02 | 3.84E-02 | 5.29E-02 |
| <b>FS_PFC_L</b>  | 2.83E-01 | 3.05E-03 | 2.79E-01 | 1.99E-01 | 2.63E-01 | 2.47E-01 |
| <b>FS_PFC_R</b>  | 3.02E-01 | 1.58E-03 | 3.08E-01 | 2.13E-01 | 2.88E-01 | 2.64E-01 |
| <b>FS_M_L</b>    | 2.92E-01 | 4.62E-03 | 2.55E-01 | 1.95E-01 | 2.57E-01 | 2.42E-01 |
| <b>FS_M_R</b>    | 2.82E-01 | 2.31E-02 | 2.44E-01 | 1.88E-01 | 2.46E-01 | 2.48E-01 |
| <b>TR_PFC_L</b>  | 2.87E-01 | 1.72E-03 | 2.84E-01 | 2.24E-01 | 2.77E-01 | 2.50E-01 |
| <b>TR_PFC_R</b>  | 2.83E-01 | 8.85E-04 | 2.85E-01 | 2.26E-01 | 2.76E-01 | 2.40E-01 |
| <b>TR_SM_L</b>   | 1.55E-01 | 7.18E-03 | 1.42E-01 | 1.33E-01 | 1.38E-01 | 1.34E-01 |
| <b>TR_SM_R</b>   | 1.66E-01 | 3.07E-03 | 1.41E-01 | 1.33E-01 | 1.40E-01 | 1.36E-01 |
| <b>TR_aud_L</b>  | 4.03E-01 | 1.44E-01 | 3.76E-01 | 2.98E-01 | 3.50E-01 | 3.71E-01 |
| <b>TR_aud_R</b>  | 3.42E-01 | 1.70E-01 | 3.17E-01 | 2.77E-01 | 2.96E-01 | 3.08E-01 |
| <b>TR_opt_L</b>  | 2.60E-01 | 8.40E-02 | 2.51E-01 | 2.26E-01 | 2.49E-01 | 2.16E-01 |
| <b>TR_opt_R</b>  | 1.92E-01 | 2.86E-02 | 1.85E-01 | 1.62E-01 | 1.83E-01 | 1.48E-01 |
| <b>CST_L</b>     | 1.77E-01 | 9.91E-04 | 1.49E-01 | 1.40E-01 | 1.39E-01 | 1.49E-01 |
| <b>CST_R</b>     | 1.76E-01 | 4.14E-03 | 1.38E-01 | 1.25E-01 | 1.27E-01 | 1.43E-01 |
| <b>CC_PFC</b>    | 3.37E-01 | 1.10E-01 | 3.37E-01 | 2.87E-01 | 3.33E-01 | 3.13E-01 |
| <b>CC_SM</b>     | 3.59E-01 | 4.33E-02 | 3.25E-01 | 2.80E-01 | 3.37E-01 | 3.15E-01 |
| <b>CC_pariet</b> | 2.33E-01 | 1.88E-02 | 2.20E-01 | 1.91E-01 | 2.20E-01 | 2.01E-01 |
| <b>CC_temp</b>   | 2.83E-01 | 4.90E-02 | 2.52E-01 | 2.24E-01 | 2.57E-01 | 2.55E-01 |
| <b>CC_splen</b>  | 1.40E-01 | 2.18E-03 | 1.07E-01 | 9.03E-02 | 1.12E-01 | 1.08E-01 |

Abbreviation: R= Right; L=Left.

**(C) RMSE of 45 tracts for each model.**

Moving average presents the lowest RMSE in nearly every white matter tract. LOWESS model, quadratic model, and GPR model with Matern kernel (GPR\_Matern) also perform well. The linear model fits worse with the data.

| tract    | Moving_Avg | Linear   | Quadratic | GPR_RBF  | GPR_Matern | LOWESS   |
|----------|------------|----------|-----------|----------|------------|----------|
| AF_L     | 2.62E-02   | 3.16E-02 | 2.69E-02  | 2.81E-02 | 2.69E-02   | 2.72E-02 |
| AF_R     | 2.87E-02   | 3.34E-02 | 2.93E-02  | 3.03E-02 | 2.93E-02   | 2.96E-02 |
| SLF1_L   | 2.91E-02   | 3.28E-02 | 2.98E-02  | 3.02E-02 | 2.96E-02   | 2.95E-02 |
| SLF1_R   | 3.28E-02   | 3.66E-02 | 3.29E-02  | 3.35E-02 | 3.29E-02   | 3.35E-02 |
| SLF2_L   | 3.12E-02   | 3.59E-02 | 3.19E-02  | 3.29E-02 | 3.20E-02   | 3.23E-02 |
| SLF2_R   | 3.14E-02   | 3.56E-02 | 3.25E-02  | 3.32E-02 | 3.24E-02   | 3.23E-02 |
| SLF3_L   | 3.40E-02   | 3.88E-02 | 3.47E-02  | 3.57E-02 | 3.48E-02   | 3.52E-02 |
| SLF3_R   | 3.81E-02   | 4.15E-02 | 3.91E-02  | 3.97E-02 | 3.91E-02   | 3.91E-02 |
| FAT_L    | 3.17E-02   | 3.64E-02 | 3.20E-02  | 3.31E-02 | 3.21E-02   | 3.25E-02 |
| FAT_R    | 2.94E-02   | 3.18E-02 | 2.96E-02  | 3.00E-02 | 2.97E-02   | 2.98E-02 |
| PF_L     | 2.83E-02   | 3.06E-02 | 2.88E-02  | 2.92E-02 | 2.89E-02   | 2.87E-02 |
| PF_R     | 2.79E-02   | 3.01E-02 | 2.82E-02  | 2.87E-02 | 2.84E-02   | 2.83E-02 |
| CGB_L    | 4.39E-02   | 4.77E-02 | 4.49E-02  | 4.55E-02 | 4.47E-02   | 4.44E-02 |
| CGB_R    | 4.43E-02   | 4.89E-02 | 4.53E-02  | 4.61E-02 | 4.52E-02   | 4.52E-02 |
| CGH_L    | 2.92E-02   | 3.46E-02 | 3.03E-02  | 3.19E-02 | 3.05E-02   | 3.01E-02 |
| CGH_R    | 2.79E-02   | 3.34E-02 | 2.94E-02  | 3.04E-02 | 2.92E-02   | 2.88E-02 |
| FX_L     | 2.80E-02   | 2.88E-02 | 2.80E-02  | 2.82E-02 | 2.82E-02   | 2.81E-02 |
| FX_R     | 2.33E-02   | 2.56E-02 | 2.35E-02  | 2.39E-02 | 2.36E-02   | 2.36E-02 |
| ST_L     | 2.30E-02   | 2.33E-02 | 2.30E-02  | 2.32E-02 | 2.34E-02   | 2.30E-02 |
| ST_R     | 2.43E-02   | 2.46E-02 | 2.42E-02  | 2.44E-02 | 2.45E-02   | 2.42E-02 |
| UF_L     | 2.71E-02   | 3.03E-02 | 2.79E-02  | 2.86E-02 | 2.79E-02   | 2.75E-02 |
| UF_R     | 2.71E-02   | 3.01E-02 | 2.75E-02  | 2.83E-02 | 2.77E-02   | 2.76E-02 |
| IFOF_L   | 2.51E-02   | 3.09E-02 | 2.57E-02  | 2.70E-02 | 2.57E-02   | 2.63E-02 |
| IFOF_R   | 2.35E-02   | 2.86E-02 | 2.39E-02  | 2.51E-02 | 2.40E-02   | 2.43E-02 |
| ILF_L    | 4.14E-02   | 4.26E-02 | 4.16E-02  | 4.17E-02 | 4.17E-02   | 4.16E-02 |
| ILF_R    | 3.86E-02   | 3.99E-02 | 3.92E-02  | 3.93E-02 | 3.92E-02   | 3.89E-02 |
| FS_PFC_L | 2.61E-02   | 3.08E-02 | 2.62E-02  | 2.76E-02 | 2.64E-02   | 2.67E-02 |
| FS_PFC_R | 2.59E-02   | 3.10E-02 | 2.58E-02  | 2.75E-02 | 2.62E-02   | 2.66E-02 |
| FS_M_L   | 2.89E-02   | 3.43E-02 | 2.96E-02  | 3.08E-02 | 2.96E-02   | 2.99E-02 |
| FS_M_R   | 3.02E-02   | 3.52E-02 | 3.10E-02  | 3.21E-02 | 3.09E-02   | 3.09E-02 |



|           |          |          |          |          |          |          |
|-----------|----------|----------|----------|----------|----------|----------|
| TR_PFC_L  | 2.53E-02 | 2.99E-02 | 2.53E-02 | 2.64E-02 | 2.55E-02 | 2.59E-02 |
| TR_PFC_R  | 2.47E-02 | 2.92E-02 | 2.47E-02 | 2.57E-02 | 2.48E-02 | 2.54E-02 |
| TR_SM_L   | 2.56E-02 | 2.77E-02 | 2.58E-02 | 2.59E-02 | 2.58E-02 | 2.59E-02 |
| TR_SM_R   | 2.57E-02 | 2.81E-02 | 2.61E-02 | 2.62E-02 | 2.61E-02 | 2.62E-02 |
| TR_aud_L  | 2.01E-02 | 2.40E-02 | 2.05E-02 | 2.18E-02 | 2.09E-02 | 2.06E-02 |
| TR_aud_R  | 2.14E-02 | 2.40E-02 | 2.18E-02 | 2.24E-02 | 2.21E-02 | 2.19E-02 |
| TR_opt_L  | 2.87E-02 | 3.19E-02 | 2.89E-02 | 2.94E-02 | 2.89E-02 | 2.96E-02 |
| TR_opt_R  | 3.01E-02 | 3.30E-02 | 3.02E-02 | 3.07E-02 | 3.03E-02 | 3.09E-02 |
| CST_L     | 2.00E-02 | 2.20E-02 | 2.03E-02 | 2.04E-02 | 2.04E-02 | 2.03E-02 |
| CST_R     | 1.94E-02 | 2.13E-02 | 1.99E-02 | 2.00E-02 | 2.00E-02 | 1.98E-02 |
| CC_PFC    | 2.96E-02 | 3.43E-02 | 2.96E-02 | 3.07E-02 | 2.97E-02 | 3.01E-02 |
| CC_SM     | 2.69E-02 | 3.28E-02 | 2.76E-02 | 2.85E-02 | 2.73E-02 | 2.78E-02 |
| CC_pariet | 2.81E-02 | 3.18E-02 | 2.84E-02 | 2.89E-02 | 2.84E-02 | 2.87E-02 |
| CC_temp   | 2.15E-02 | 2.47E-02 | 2.19E-02 | 2.23E-02 | 2.19E-02 | 2.19E-02 |
| CC_splen  | 4.16E-02 | 4.48E-02 | 4.24E-02 | 4.28E-02 | 4.23E-02 | 4.24E-02 |

Abbreviation: R= Right; L=Left.

**(D) MSE of 45 tracts for each model.**

Moving average presents the lowest MSE in nearly every white matter tract. LOWESS model, quadratic model, and GPR model with Matern kernel (GPR\_Matern) also perform well. The linear model fits worse with the data.

| tract  | Moving_Avg | Linear   | Quadratic | GPR_RBF  | GPR_Matern | LOWESS   |
|--------|------------|----------|-----------|----------|------------|----------|
| AF_L   | 6.89E-04   | 9.97E-04 | 7.24E-04  | 7.89E-04 | 7.24E-04   | 7.40E-04 |
| AF_R   | 8.21E-04   | 1.12E-03 | 8.57E-04  | 9.20E-04 | 8.59E-04   | 8.76E-04 |
| SLF1_L | 8.47E-04   | 1.07E-03 | 8.88E-04  | 9.12E-04 | 8.75E-04   | 8.73E-04 |
| SLF1_R | 1.08E-03   | 1.34E-03 | 1.08E-03  | 1.12E-03 | 1.08E-03   | 1.12E-03 |
| SLF2_L | 9.72E-04   | 1.29E-03 | 1.02E-03  | 1.08E-03 | 1.02E-03   | 1.05E-03 |
| SLF2_R | 9.87E-04   | 1.27E-03 | 1.06E-03  | 1.10E-03 | 1.05E-03   | 1.05E-03 |
| SLF3_L | 1.15E-03   | 1.51E-03 | 1.20E-03  | 1.28E-03 | 1.21E-03   | 1.24E-03 |
| SLF3_R | 1.45E-03   | 1.73E-03 | 1.53E-03  | 1.58E-03 | 1.53E-03   | 1.53E-03 |
| FAT_L  | 1.00E-03   | 1.33E-03 | 1.03E-03  | 1.10E-03 | 1.03E-03   | 1.06E-03 |
| FAT_R  | 8.62E-04   | 1.01E-03 | 8.74E-04  | 9.02E-04 | 8.84E-04   | 8.87E-04 |
| PF_L   | 8.02E-04   | 9.35E-04 | 8.27E-04  | 8.54E-04 | 8.33E-04   | 8.26E-04 |
| PF_R   | 7.79E-04   | 9.04E-04 | 7.96E-04  | 8.22E-04 | 8.04E-04   | 8.03E-04 |

|                  |          |          |          |          |          |          |
|------------------|----------|----------|----------|----------|----------|----------|
| <b>CGB_L</b>     | 1.93E-03 | 2.27E-03 | 2.02E-03 | 2.07E-03 | 2.00E-03 | 1.97E-03 |
| <b>CGB_R</b>     | 1.96E-03 | 2.40E-03 | 2.05E-03 | 2.13E-03 | 2.04E-03 | 2.04E-03 |
| <b>CGH_L</b>     | 8.55E-04 | 1.20E-03 | 9.21E-04 | 1.01E-03 | 9.32E-04 | 9.04E-04 |
| <b>CGH_R</b>     | 7.79E-04 | 1.11E-03 | 8.62E-04 | 9.24E-04 | 8.51E-04 | 8.31E-04 |
| <b>FX_L</b>      | 7.83E-04 | 8.27E-04 | 7.85E-04 | 7.95E-04 | 7.97E-04 | 7.87E-04 |
| <b>FX_R</b>      | 5.45E-04 | 6.56E-04 | 5.53E-04 | 5.72E-04 | 5.57E-04 | 5.58E-04 |
| <b>ST_L</b>      | 5.30E-04 | 5.44E-04 | 5.27E-04 | 5.37E-04 | 5.46E-04 | 5.30E-04 |
| <b>ST_R</b>      | 5.91E-04 | 6.03E-04 | 5.84E-04 | 5.93E-04 | 6.02E-04 | 5.85E-04 |
| <b>UF_L</b>      | 7.32E-04 | 9.19E-04 | 7.76E-04 | 8.16E-04 | 7.78E-04 | 7.58E-04 |
| <b>UF_R</b>      | 7.37E-04 | 9.06E-04 | 7.59E-04 | 8.00E-04 | 7.66E-04 | 7.60E-04 |
| <b>IFOF_L</b>    | 6.28E-04 | 9.56E-04 | 6.60E-04 | 7.31E-04 | 6.61E-04 | 6.89E-04 |
| <b>IFOF_R</b>    | 5.50E-04 | 8.19E-04 | 5.70E-04 | 6.31E-04 | 5.75E-04 | 5.93E-04 |
| <b>ILF_L</b>     | 1.71E-03 | 1.81E-03 | 1.73E-03 | 1.74E-03 | 1.74E-03 | 1.73E-03 |
| <b>ILF_R</b>     | 1.49E-03 | 1.60E-03 | 1.54E-03 | 1.54E-03 | 1.53E-03 | 1.51E-03 |
| <b>FS_PFC_L</b>  | 6.80E-04 | 9.46E-04 | 6.84E-04 | 7.60E-04 | 6.99E-04 | 7.14E-04 |
| <b>FS_PFC_R</b>  | 6.72E-04 | 9.61E-04 | 6.66E-04 | 7.57E-04 | 6.85E-04 | 7.08E-04 |
| <b>FS_M_L</b>    | 8.34E-04 | 1.17E-03 | 8.79E-04 | 9.49E-04 | 8.76E-04 | 8.94E-04 |
| <b>FS_M_R</b>    | 9.12E-04 | 1.24E-03 | 9.60E-04 | 1.03E-03 | 9.57E-04 | 9.54E-04 |
| <b>TR_PFC_L</b>  | 6.38E-04 | 8.94E-04 | 6.41E-04 | 6.95E-04 | 6.48E-04 | 6.72E-04 |
| <b>TR_PFC_R</b>  | 6.12E-04 | 8.52E-04 | 6.09E-04 | 6.60E-04 | 6.17E-04 | 6.48E-04 |
| <b>TR_SM_L</b>   | 6.54E-04 | 7.69E-04 | 6.65E-04 | 6.72E-04 | 6.67E-04 | 6.71E-04 |
| <b>TR_SM_R</b>   | 6.62E-04 | 7.92E-04 | 6.82E-04 | 6.89E-04 | 6.83E-04 | 6.86E-04 |
| <b>TR_aud_L</b>  | 4.03E-04 | 5.77E-04 | 4.21E-04 | 4.73E-04 | 4.38E-04 | 4.24E-04 |
| <b>TR_aud_R</b>  | 4.56E-04 | 5.76E-04 | 4.74E-04 | 5.02E-04 | 4.88E-04 | 4.80E-04 |
| <b>TR_opt_L</b>  | 8.24E-04 | 1.02E-03 | 8.34E-04 | 8.63E-04 | 8.37E-04 | 8.74E-04 |
| <b>TR_opt_R</b>  | 9.07E-04 | 1.09E-03 | 9.14E-04 | 9.40E-04 | 9.17E-04 | 9.56E-04 |
| <b>CST_L</b>     | 4.00E-04 | 4.85E-04 | 4.14E-04 | 4.18E-04 | 4.18E-04 | 4.14E-04 |
| <b>CST_R</b>     | 3.77E-04 | 4.55E-04 | 3.94E-04 | 4.00E-04 | 3.99E-04 | 3.92E-04 |
| <b>CC_PFC</b>    | 8.74E-04 | 1.17E-03 | 8.74E-04 | 9.40E-04 | 8.79E-04 | 9.06E-04 |
| <b>CC_SM</b>     | 7.22E-04 | 1.08E-03 | 7.60E-04 | 8.11E-04 | 7.47E-04 | 7.72E-04 |
| <b>CC_pariet</b> | 7.92E-04 | 1.01E-03 | 8.05E-04 | 8.35E-04 | 8.05E-04 | 8.25E-04 |
| <b>CC_temp</b>   | 4.61E-04 | 6.12E-04 | 4.81E-04 | 4.99E-04 | 4.78E-04 | 4.79E-04 |
| <b>CC_splen</b>  | 1.73E-03 | 2.01E-03 | 1.80E-03 | 1.83E-03 | 1.79E-03 | 1.80E-03 |

Abbreviation: R= Right; L=Left.

**Table S3. Conners' continuous performance test (CCPT).**

| <u>Item</u>                            | <u>Abbrev.</u> | <u>Description</u>                                                                                                                                                           |
|----------------------------------------|----------------|------------------------------------------------------------------------------------------------------------------------------------------------------------------------------|
| <b>Attention</b>                       |                |                                                                                                                                                                              |
| Omission errors                        | omis           | The failure to respond to target letters (missed targets)                                                                                                                    |
| Hit RT Std. Error                      | rtsd           | Consistency of hit response speed                                                                                                                                            |
| Variability                            | var            | Intra-individual variability in hit RT. the amount of variability the individual shows in separate segments of the test in relation to his or her own overall standard error |
| Detectability (d')                     | detect         | The ability to distinguish targets from nontargets                                                                                                                           |
| Response Style                         | rpsty          | The ratio of hit the target to hit nontarget stimuli; the tendency to avoid commission errors                                                                                |
| Hit RT ISI Change                      | rtisi          | Whether hit RT performance changes with longer ISIs (inter-stimulus intervals)                                                                                               |
| Hit SE ISI Change                      | seisi          | Whether performance becomes more variable (change in the standard error of reaction times) with longer ISIs                                                                  |
| <b>Response inhibition/impulsivity</b> |                |                                                                                                                                                                              |
| Commission errors                      | comis          | False-positive response to non-targets                                                                                                                                       |
| Hit RT                                 | rt             | Hit reaction time: mean response speed of correct responses                                                                                                                  |
| Perseverations                         | per            | Hit RT less than 100 ms constitutes a perseverative response                                                                                                                 |
| <b>Vigilance</b>                       |                |                                                                                                                                                                              |
| Hit RT Block Change                    | rtbc           | The slope of change in hit RT across blocks of the test. High values indicate a significant slowing down in reaction                                                         |

|                     |      |                                                                                                                                                                              |
|---------------------|------|------------------------------------------------------------------------------------------------------------------------------------------------------------------------------|
| Hit SE Block Change | sebc | Standard errors of Hit RT changed by blocks. High values indicate a loss of consistency as the test proceeds. Low values indicate sustained or improved response consistency |
|---------------------|------|------------------------------------------------------------------------------------------------------------------------------------------------------------------------------|

**Table S4. Cambridge Neuropsychological Testing Automated Battery.**

| <u>Item</u>                                 | <u>Abbrev.</u> | <u>Description</u>                                                                                                                                                                                                                                                                                                                                                                                                                                  |
|---------------------------------------------|----------------|-----------------------------------------------------------------------------------------------------------------------------------------------------------------------------------------------------------------------------------------------------------------------------------------------------------------------------------------------------------------------------------------------------------------------------------------------------|
| <b>Processing speed</b>                     |                |                                                                                                                                                                                                                                                                                                                                                                                                                                                     |
| <b>Motor Screening</b>                      | MOT            | A series of crosses are shown in different locations on the screen, and the participants should point to the crosses. Latency is defined as the time taken for the participant to touch the cross after it appeared. The value is the motor screening mean latencies of the ten crosses presented correctly responded to (71).                                                                                                                      |
| <b>Reaction Time</b>                        | RTI            | one of five possible different stimuli have been presented, and the participant must touch the screen when a yellow dot is displayed. RTI movement time latency is usually normally distributed for correct responses.                                                                                                                                                                                                                              |
| <b>Big/ Little Circle</b>                   | BLC            | The participant is presented with a series of pairs of circles, one large and one small. The participant is instructed first to point to the smaller of the two circles, and then, after 20 trials, to point to the larger circle. This measures the speed of response, i.e., how quickly the subject touched the correct stimulus. Latency is measured in milliseconds. The test value is the mean correct latency.                                |
| <b>Executive function</b>                   |                |                                                                                                                                                                                                                                                                                                                                                                                                                                                     |
| <b>Stocking of Cambridge</b>                | SOC            | SOC test requires participants to plan and execute a set of movements to replicate a goal arrangement of balls. SOC problems solved in minimum moves represents the number of problems solved in the specified minimum number of moves (120).                                                                                                                                                                                                       |
| <b>Spatial Working Memory</b>               | SWM            | SWM measures working memory for spatial stimuli. When a token is found inside a square, the subject must select. The square then closes. When the participant begins to search for other tokens, he/she should ignore squares where tokens have been found (71). Total errors were reported.                                                                                                                                                        |
| <b>Intradimension/ Extradimension Shift</b> | IED            | This test assesses the ability to maintain attention to different stimuli within a dimension (ex. Within the line dimension) (intra-dimensional shift, IDS) and then shift attention to another dimension (e.g., Line dimension to shape dimension) (extra-dimensional shift, EDS). The test was terminated if the participant failed to learn the response criterion on any stage after 50 trials. IED completed stage error represents the errors |

|                                            |     |                                                                                                                                                                                                                                                                                                                                                                                                                                                                               |
|--------------------------------------------|-----|-------------------------------------------------------------------------------------------------------------------------------------------------------------------------------------------------------------------------------------------------------------------------------------------------------------------------------------------------------------------------------------------------------------------------------------------------------------------------------|
|                                            |     | made on stages successfully completed. Subjects failing at any stage of the ID/ED shift will have less opportunity to make errors than those who finish, or get closer to finishing, the task (71, 72).                                                                                                                                                                                                                                                                       |
| <b>Visual memory</b>                       |     |                                                                                                                                                                                                                                                                                                                                                                                                                                                                               |
| <b>Pattern Recognition Memory</b>          | PRM | This test measures recognition memory for visual patterns and spatial locations. The number of correct responses is expressed as a percentage (accuracy) (71).                                                                                                                                                                                                                                                                                                                |
| <b>Paired Associates Learning</b>          | PAL | PAL assesses the participant's ability to form visuospatial association. The participant is presented with several boxes opening in a randomized order. One or more of them will contain a pattern. When all the boxes are open, the participant must touch the boxes where the pattern was originally located. PAL stages completed is an indicator of the overall success of how many stages were successfully completed. The test gradually increases in difficulty (121). |
| <b>Delayed Matching to Sample</b>          | DMS | A series of abstract patterns are displayed on a computer screen. Then pairs of stimuli were shown, one of which was previously displayed and one of which is new. Participants should select the stimulus that was previously seen (72).                                                                                                                                                                                                                                     |
| <b>Spatial Recognition Memory</b>          | SRM | A white square is shown sequentially in five different locations on the screen, then, the participant is presented with a series of five pairs of squares, one of which is in a place previously seen, and one of which is a distracter. The five squares are shown in reverse order. SRMcP is the percentage of correct responses.                                                                                                                                           |
| <b>Spatial Span</b>                        | SSP | SSP measures spatial short-term memory, the ability to remember the order in which visual stimuli are presented. Participants view a color-changing sequence and must reproduce the sequence by pointing to the boxes in the same order that they originally changed color. The test began with 2-box problems, and then up to 9-box problems. SSP span length is the longest sequence successfully recalled by the subject (72, 120).                                        |
| <b>Attention</b>                           |     |                                                                                                                                                                                                                                                                                                                                                                                                                                                                               |
| <b>Rapid Visual Information Processing</b> | RVP | A measure of sustained attention, including a 4-min visual continuous performance task (CPT). Digits (ranging from 2 to 9) appeared one at a time (100 digits/min) on the screen in random order. Participants were asked to press a response pad when they detected any one of three number sequences (3-5-7, 2-4-6, 4-6-8).                                                                                                                                                 |

|                                            |     |                                                                                                                                                                                                                                                                                                                                                                                                                                                                                                                                                                                                                                                                                                            |
|--------------------------------------------|-----|------------------------------------------------------------------------------------------------------------------------------------------------------------------------------------------------------------------------------------------------------------------------------------------------------------------------------------------------------------------------------------------------------------------------------------------------------------------------------------------------------------------------------------------------------------------------------------------------------------------------------------------------------------------------------------------------------------|
| <b>Matching to Sample Visual Searching</b> | MTS | The participants will observe an abstract pattern composed of four colored elements. After a brief period, a number of similar patterns are shown in a circle of boxes around the edge of the screen. Only one of these matches the pattern in the center of the screen, and the subject must specify which it is by touching it. The number of patterns in the circle may be 1, 2, 4, or 8, and the incorrect patterns are composed of juggled elements of the sample pattern or juggled distracter elements. MTS percent correct is the percentage of correct responses. As this task includes speed and accuracy demands, subjects may trade-off speed of response in favor of accuracy, or vice versa. |
|--------------------------------------------|-----|------------------------------------------------------------------------------------------------------------------------------------------------------------------------------------------------------------------------------------------------------------------------------------------------------------------------------------------------------------------------------------------------------------------------------------------------------------------------------------------------------------------------------------------------------------------------------------------------------------------------------------------------------------------------------------------------------------|

**Table S5. Child-adult comparison of people with ADHD and people with ASD.**

| (Mean $\pm$ SD)       | <b>ADHD children</b><br>(N=147) | <b>ADHD adults</b><br>(N=132)    | <b>ASD children</b><br>(N=104)  | <b>ASD adults</b><br>(N=71)      |
|-----------------------|---------------------------------|----------------------------------|---------------------------------|----------------------------------|
| Age (years)           | 11.2 $\pm$ 2.4<br>(range: 7-16) | 25.6 $\pm$ 5.5<br>(range: 17-38) | 13.6 $\pm$ 1.9<br>(range: 9-16) | 20.4 $\pm$ 3.2<br>(range: 17-35) |
| Sex (M/F)             | 121/26                          | 85/49                            | 97/7                            | 61/10                            |
| SNR                   | 27.1 $\pm$ 3.1                  | 27.3 $\pm$ 2.6                   | 27.8 $\pm$ 3.3                  | 26.9 $\pm$ 3.4                   |
| Signal dropout counts | 14.5 $\pm$ 14.6                 | 3.2 $\pm$ 6.5                    | 13.7 $\pm$ 17.8                 | 7.2 $\pm$ 10.4                   |



**Table S6. Signal-to-noise (SNR) of the MRI machine used in the study.**

Diffusion MRI images in this study are acquired from a single MRI machine from 2010 to 2018. There was no software update during this period. The SNR was stable in each year. The table summarizes the quality assurance data from other projects.

| <b>MRI Year</b>     | <b>Mean <math>\pm</math> std</b>  |
|---------------------|-----------------------------------|
| <b>2010</b> (n=119) | 27.4 $\pm$ 3.0 (range: 20.5-36.4) |
| <b>2011</b> (n=182) | 28.4 $\pm$ 3.0 (range: 21.6-35.3) |
| <b>2012</b> (n=61)  | 26.3 $\pm$ 3.0 (range: 20.4-33.5) |
| <b>2013</b> (n=238) | 27.6 $\pm$ 3.0 (range: 20.4-34.2) |
| <b>2014</b> (n=324) | 27.2 $\pm$ 2.9 (range: 20.7-36.0) |
| <b>2015</b> (n=361) | 26.5 $\pm$ 2.8 (range: 20.1-34.9) |
| <b>2016</b> (n=263) | 27.0 $\pm$ 3.1 (range: 20.1-36.2) |
| <b>2017</b> (n=192) | 26.2 $\pm$ 3.5 (range: 20.4-35.9) |
| <b>2018</b> (n=193) | 25.1 $\pm$ 2.5 (range: 20.2-33.4) |

**Table S7. Clusters derived from symptom-based hierarchical clustering.**

Ward's hierarchical clustering is based on symptom scales (SRS, Autism Spectrum Quotient, SNAP-IV), resulting in two clusters. The optimal number of clustering were confirmed by Silhouette's width (Figure S17A&B). The cluster 1 consisted of ADHD: 156/53 (M/F); ADHD sibling: 40/53; ASD: 84/6; ASD sib: 36/34; cluster 2 consisted of ADHD: 49/21; ADHD sibling: 16/12; ASD: 74/11; ASD sib: 2/0).

| (Mean ± SD)                                            | Cluster 1 (N=462)            | Cluster 2 (N=185)            |
|--------------------------------------------------------|------------------------------|------------------------------|
| <b>Age</b>                                             | 17.13 ± 7.1<br>(range: 6-40) | 18.35 ± 6.9<br>(range: 7-38) |
| <b>Sex (M/F)</b>                                       | 316/146                      | 141/44                       |
| <b>SNAP-IV</b>                                         |                              |                              |
| Inattentive                                            | 12.2 ± 7.8                   | 16.4 ± 6.5                   |
| Hyperactive/Impulsivity                                | 8.3 ± 6.9                    | 10.4 ± 7.2                   |
| Oppositionality                                        | 7.9 ± 6.0                    | 10.0 ± 5.8                   |
| Total score                                            | 20.5 ± 13.7                  | 26.8 ± 12.1                  |
| <b>Autism Spectrum Quotient (4-point Likert scale)</b> |                              |                              |
| Social Skill                                           | 22.6 ± 6.1                   | 30.8 ± 5.1                   |
| Attention Switching                                    | 23.9 ± 4.5                   | 30.0 ± 4.0                   |
| Attention to Details                                   | 23.6 ± 4.4                   | 25.6 ± 5.2                   |
| Communication                                          | 21.6 ± 6.2                   | 31.0 ± 3.4                   |
| Imagination                                            | 22.0 ± 4.9                   | 27.8 ± 5.0                   |
| Total score                                            | 113.7 ± 19.1                 | 145.1 ± 13.3                 |
| <b>Autism Spectrum Quotient (Dichotomous scale)</b>    |                              |                              |
| Social Skill                                           | 3.9 ± 2.9                    | 7.3 ± 2.3                    |
| Attention Switching                                    | 4.6 ± 2.2                    | 7.3 ± 1.7                    |
| Attention to Details                                   | 4.5 ± 2.2                    | 5.5 ± 2.3                    |
| Communication                                          | 3.5 ± 2.8                    | 7.6 ± 1.5                    |
| Imagination                                            | 3.6 ± 2.2                    | 6.3 ± 2.2                    |
| Total score                                            | 20.2 ± 8.6                   | 34.0 ± 5.9                   |
| <b>Social Response Scale</b>                           |                              |                              |
| Social communication                                   | 16.6 ± 12.1                  | 46.7 ± 10.7                  |
| Stereotyped behaviors                                  | 8.2 ± 6.4                    | 24.5 ± 6.8                   |
| Social awareness                                       | 15.7 ± 6.9                   | 21.8 ± 4.5                   |
| Social emotion                                         | 5.8 ± 3.9                    | 14.7 ± 3.8                   |

|                              |              |              |
|------------------------------|--------------|--------------|
| Total scores                 | 46.3 ± 25.6  | 107.7 ± 20.0 |
| <b>Intelligence Test</b>     |              |              |
| Verbal IQ                    | 106.4 ± 13.2 | 103.0 ± 14.5 |
| Performance IQ               | 106.3 ± 14.8 | 104.2 ± 15.7 |
| Full IQ                      | 106.2 ± 13.6 | 103.4 ± 15.2 |
| <b>SNR</b>                   | 27.7 ± 3.0   | 27.4 ± 2.9   |
| <b>Signal dropout counts</b> | 8.8 ± 12.5   | 9.6 ± 3.2    |

---

## Supplementary Figures

### Figure S1: SNR and Signal Dropout of DSI datasets.

DSI datasets were subject to stringent quality control. DSI data sets were discarded if they had more than 60 slices with signal dropout (60 slices correspond to 1% of slices in 102 gradient x 58), a proxy of in-scanner motion. In addition, diffusion data sets with signal-to-noise ratios (SNRs) of less than 20 were discarded. The following figures showed the SNR distributions and signal dropout counts distributions for people with ADHD and their unaffected siblings, people with ASD and their unaffected siblings, and typically developed control participants for normative model, respectively.

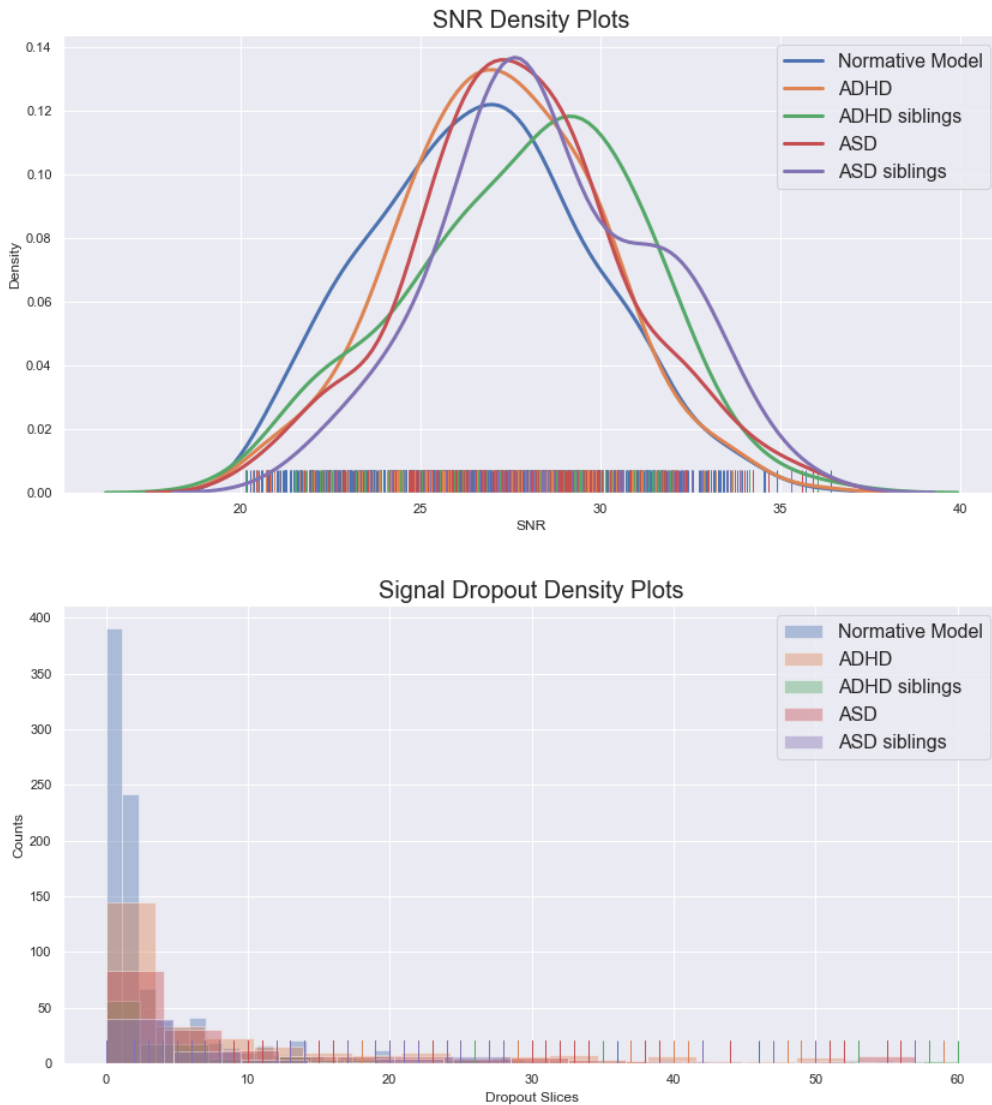

## Figure S2. Sex-specific normative models of white matter tracts relative to the age norm.

Sex-specific normative models were built separately for each white matter tract. The orange curve represents the trajectory of mean GFA/MD/RD/AD values of the controls with age. The pink-shaded area encompasses the width of  $\pm 1.96$  standard deviations from the mean. Colored dots represent different patient groups. By using the normative models, diffusion indices can be transformed into Z-scores, yielding individualized white matter tract alteration profiles (Figure S4). Each white matter tract could be transformed and represented by a 4-numbered tuple (GFA Z-score, MD Z-score, RD Z-score, AD Z-score). Here we used left arcuate fasciculus as an example to illustrate the sex-specific normative model for each white matter metric.

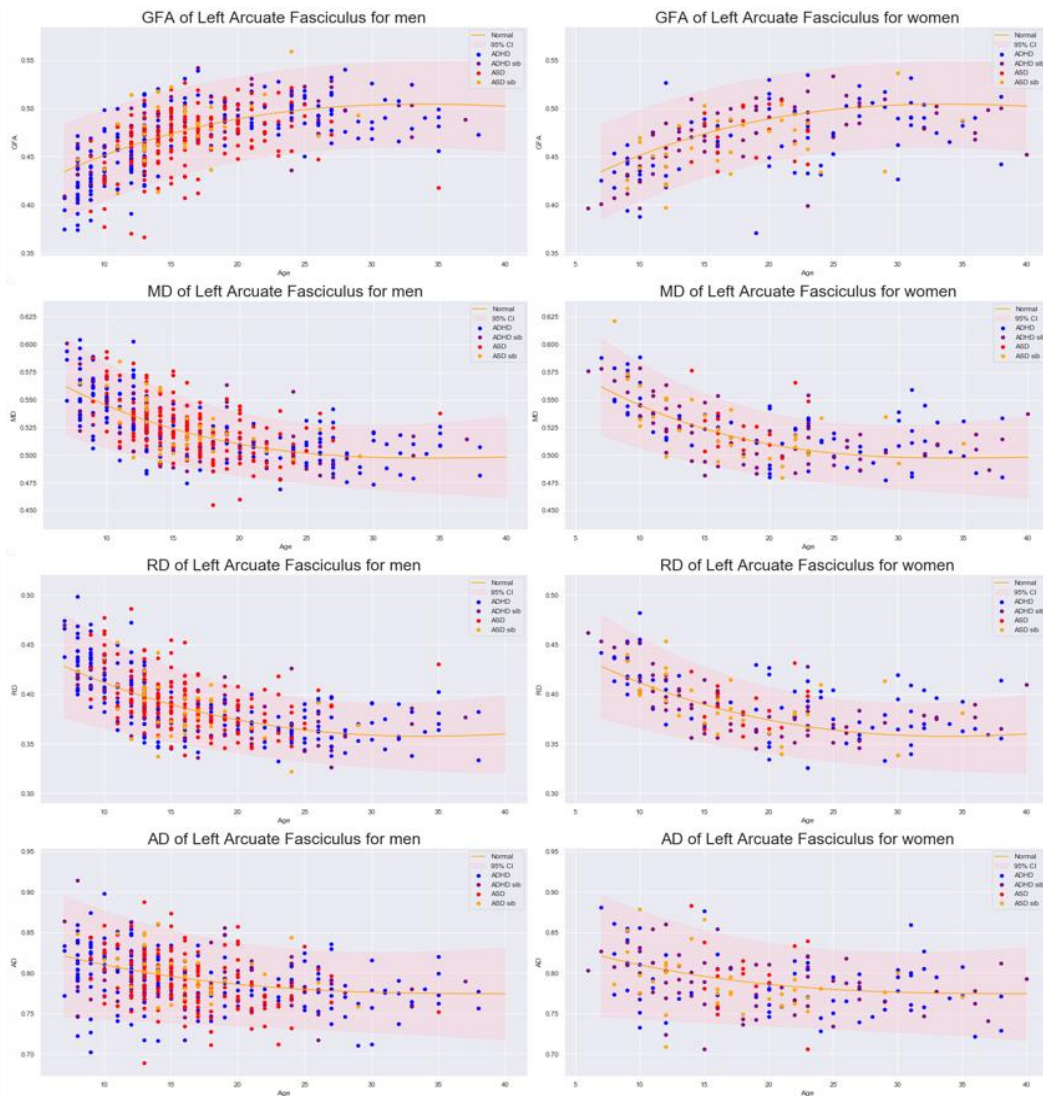

### Figure S3. Age distribution of normative models of white matter tracts.

The age bins of the normative model for (A) male and (B) female participants. (C) The age distributions of probands, siblings, and typically developing control participants. (D) The GFA scatter plot of left arcuate fasciculus for typically developing controls and the resulting normative model.

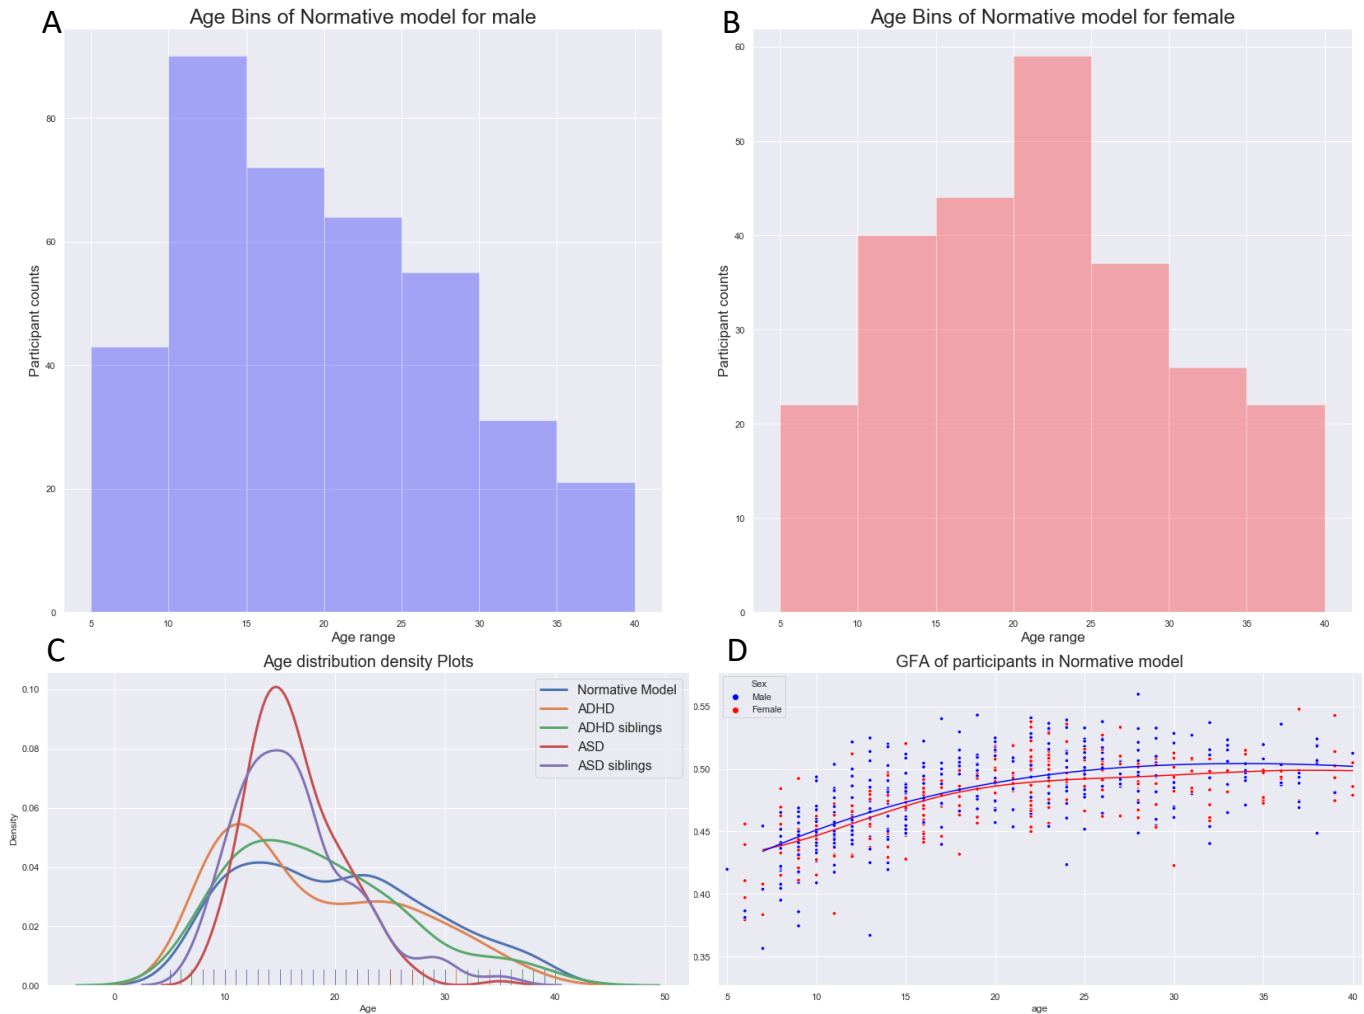

### Figure S4. Individualized white matter tract alteration (deviation) profiles.

Individualized white matter-tract-alteration profiles for people with (A) attention-deficit hyperactivity disorder (ADHD) and (B) autism spectrum disorder (ASD). Colors are coded with generalized fractional anisotropy GFA Z-scores. The y-axis represents different individuals, while the x-axis represents 45 main white matter tracts. The white matter status of each person could be represented by a 45-numbered tuple, and each entry corresponds to GFA Z-score for each white matter tract. This plot demonstrates high heterogeneity among tract alterations. Each patient with ADHD or patient with ASD present idiosyncratic white matter alterations. For complete tract names, please refer to Table S1.

#### (A) Individualized white matter tract alteration (deviation) profiles for ADHD

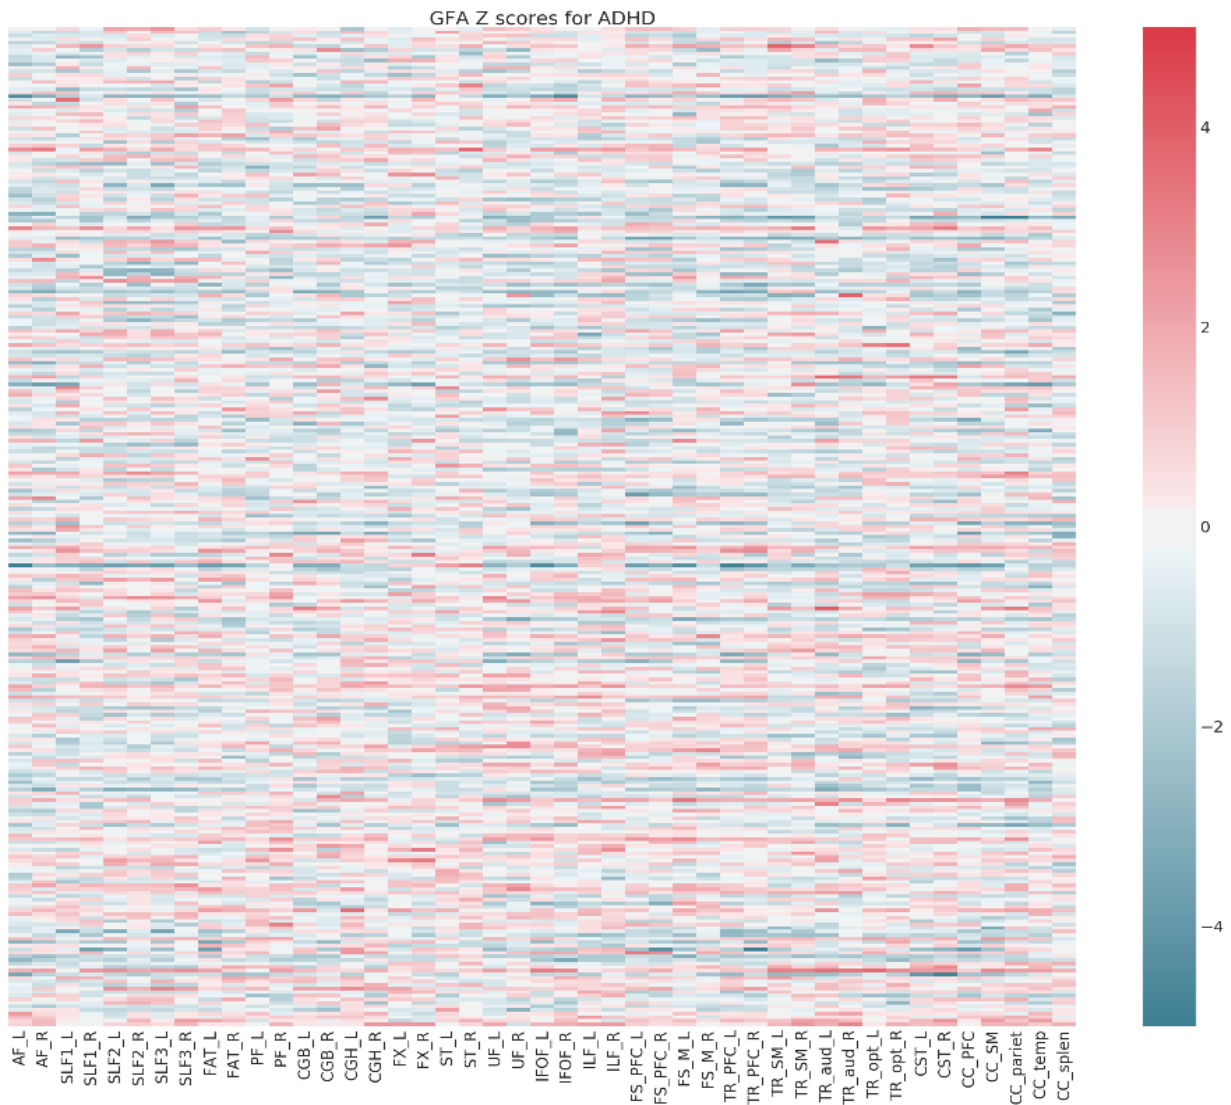

**(B) Individualized white matter tract alteration (deviation) profiles for ASD**

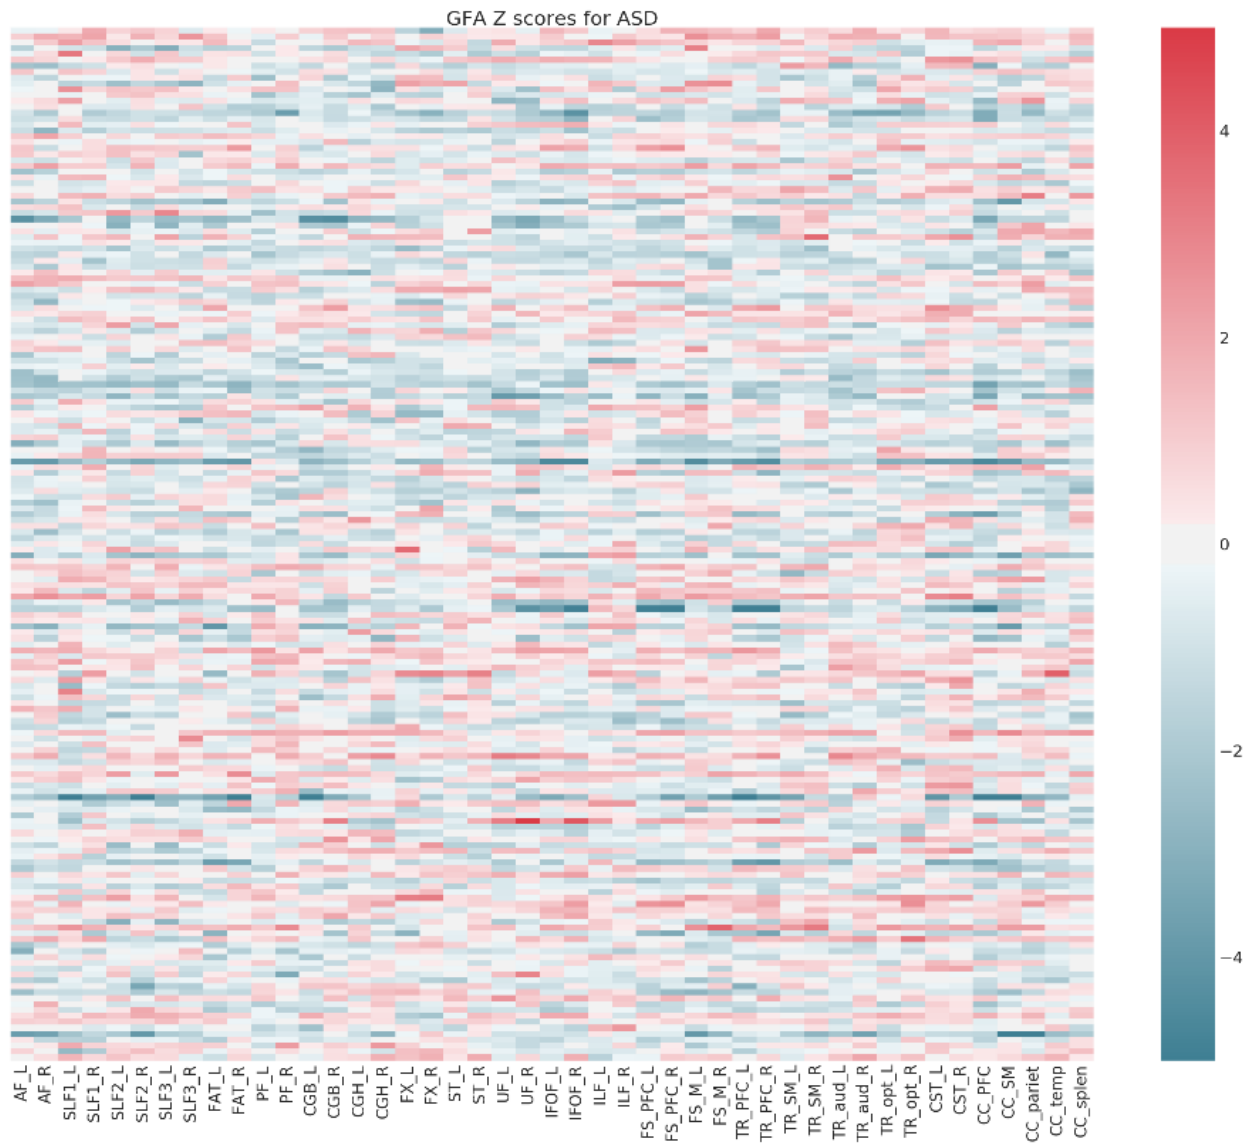



### Figure S5. SNR and signal dropout counts were plotted on the normative models.

Sex-specific normative models of left arcuate fasciculus are shown. The pink-shaded area encompasses the width of  $\pm 1.96$  standard deviations from the mean. Colored dots represent different patient groups. In the way of “the larger size, the larger value,” the sizes of the dots reflect the MRI image SNR values (the lower values, the worse data quality) (A&B) or signal dropout counts (the higher value, the worse data quality) (C&D).

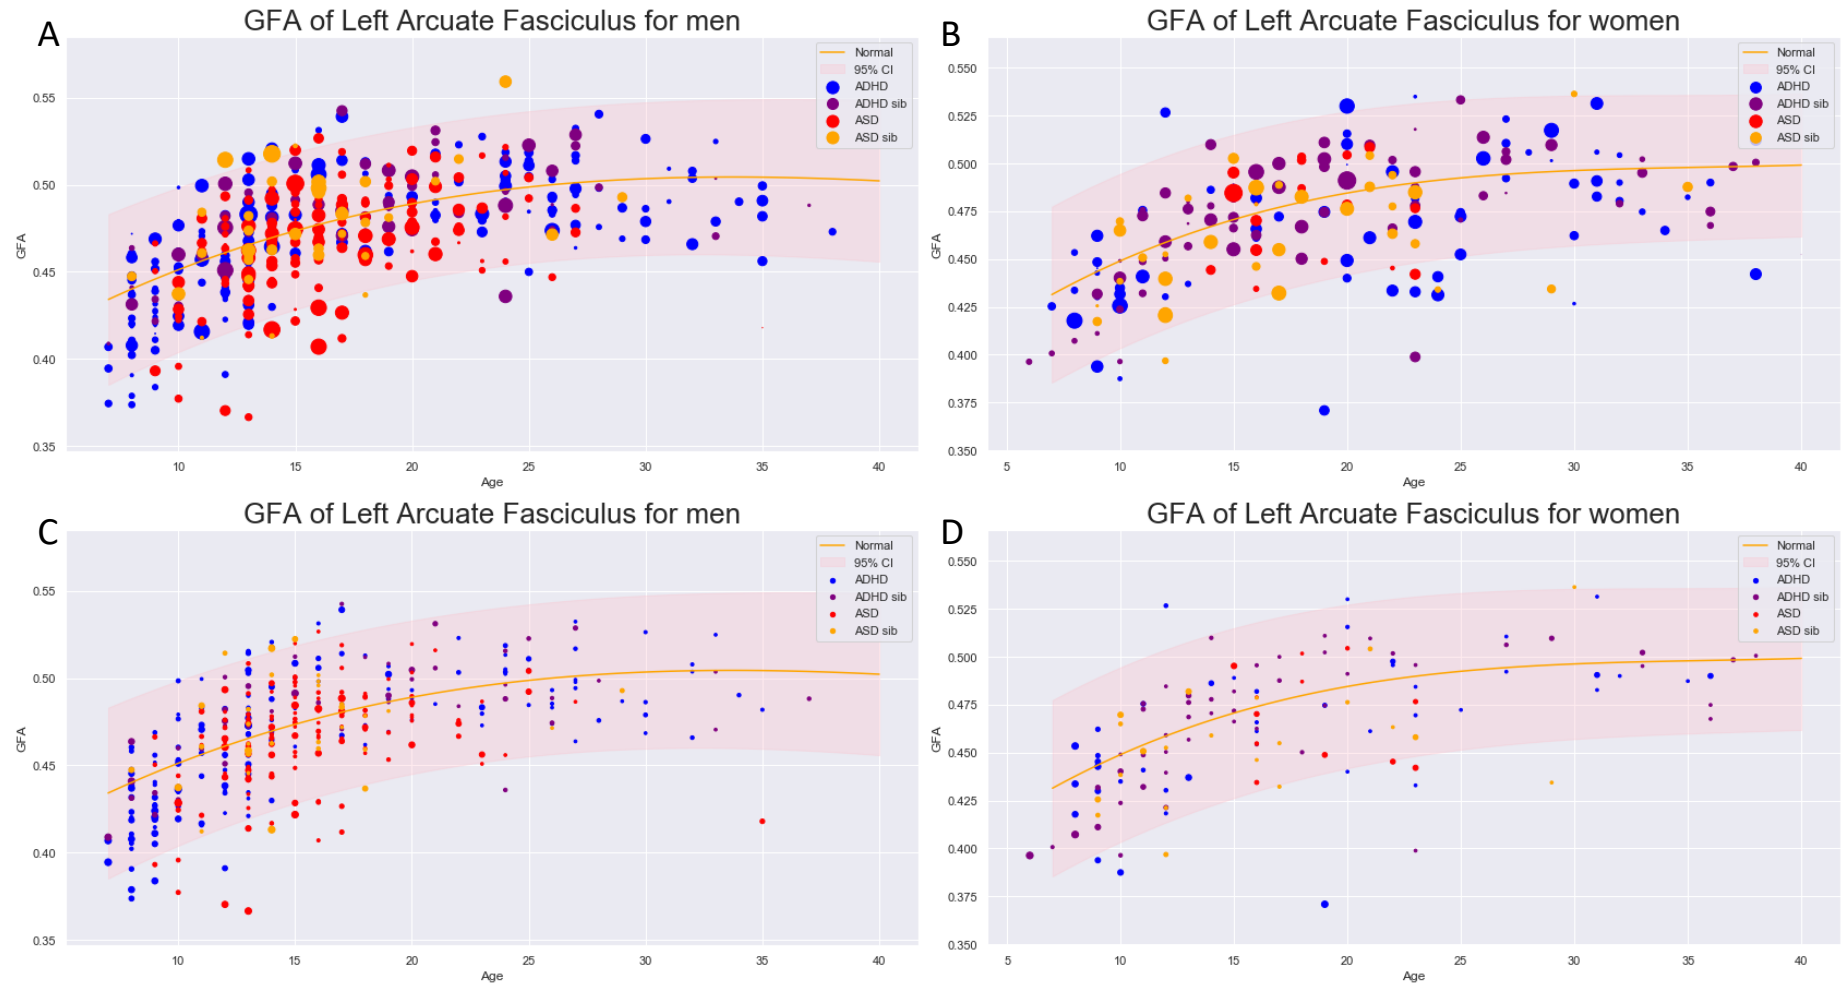

**Figure S6. The impact of image quality, signal-to-noise ratio (SNR) and signal dropout counts on the results**

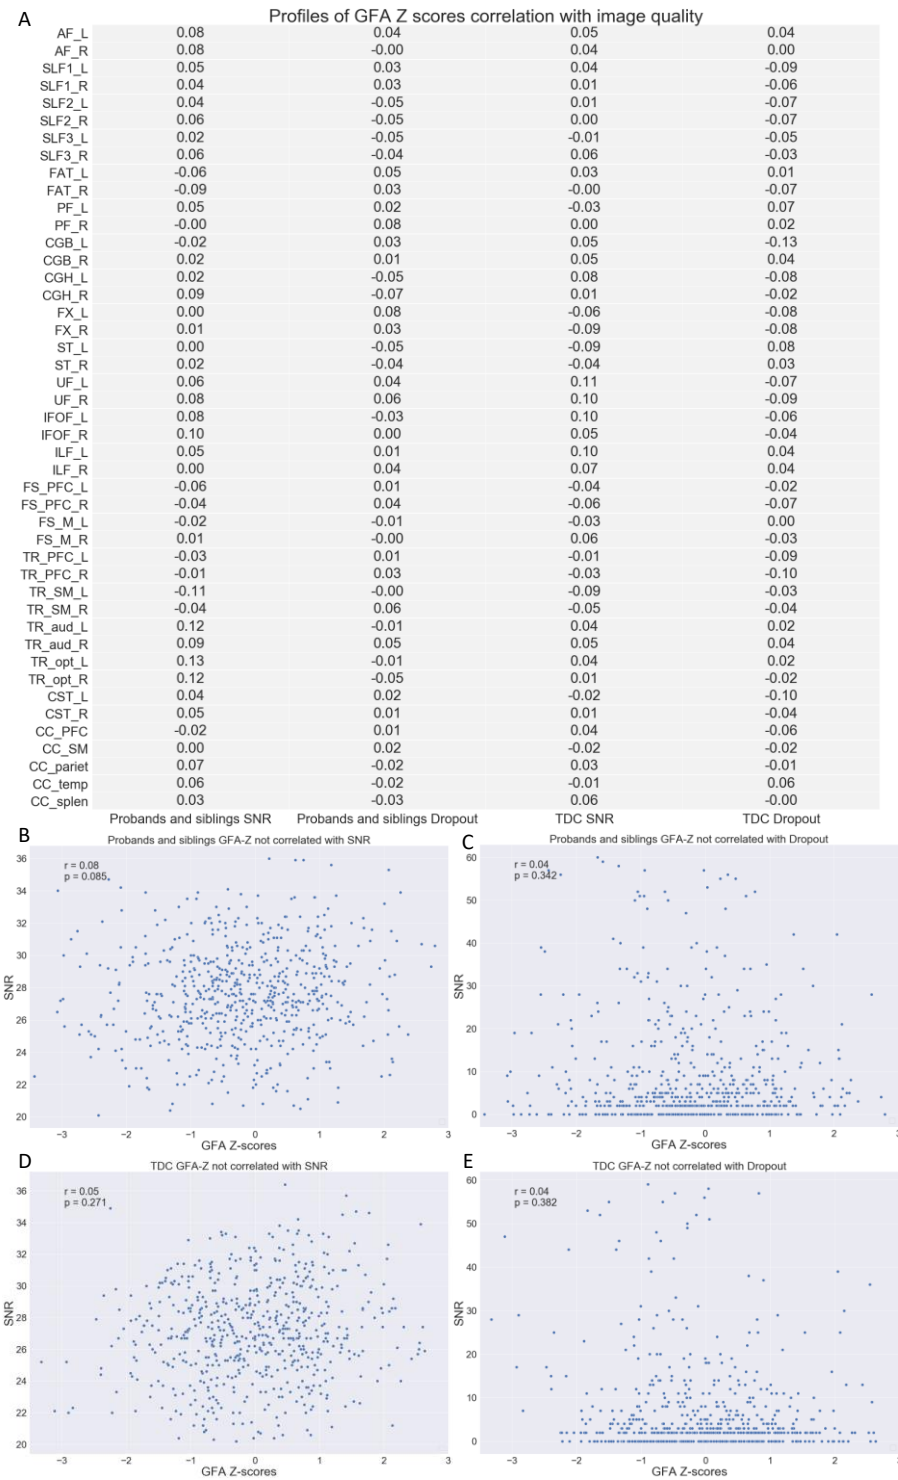

The image quality does not correlate with GFA Z-scores. (A) In both typically developed controls and clinical groups, the correlation between GFA Z-scores and image quality measures, SNR and signal dropout counts, were insignificant. (B-E) The scatter plot of image quality and GFA Z-scores of left arcuate fasciculus for example. SNR and Signal dropout counts are not correlated with GFA Z-scores in probands and siblings (B-C) or typically developed controls (D-E).

**Figure S7. GFA Z-score deviation profiles of people with attention-deficit/hyperactivity disorder, autism spectrum disorder, and their unaffected siblings.**

Scores that did not pass multiple testing using the Benjamini–Hochberg procedure (FDR = 0.05) were masked. The color gradient encodes Z-score effect size; cyan indicates a negative effect size, and red indicates a positive effect size. For complete tract names, please refer to Table S1.

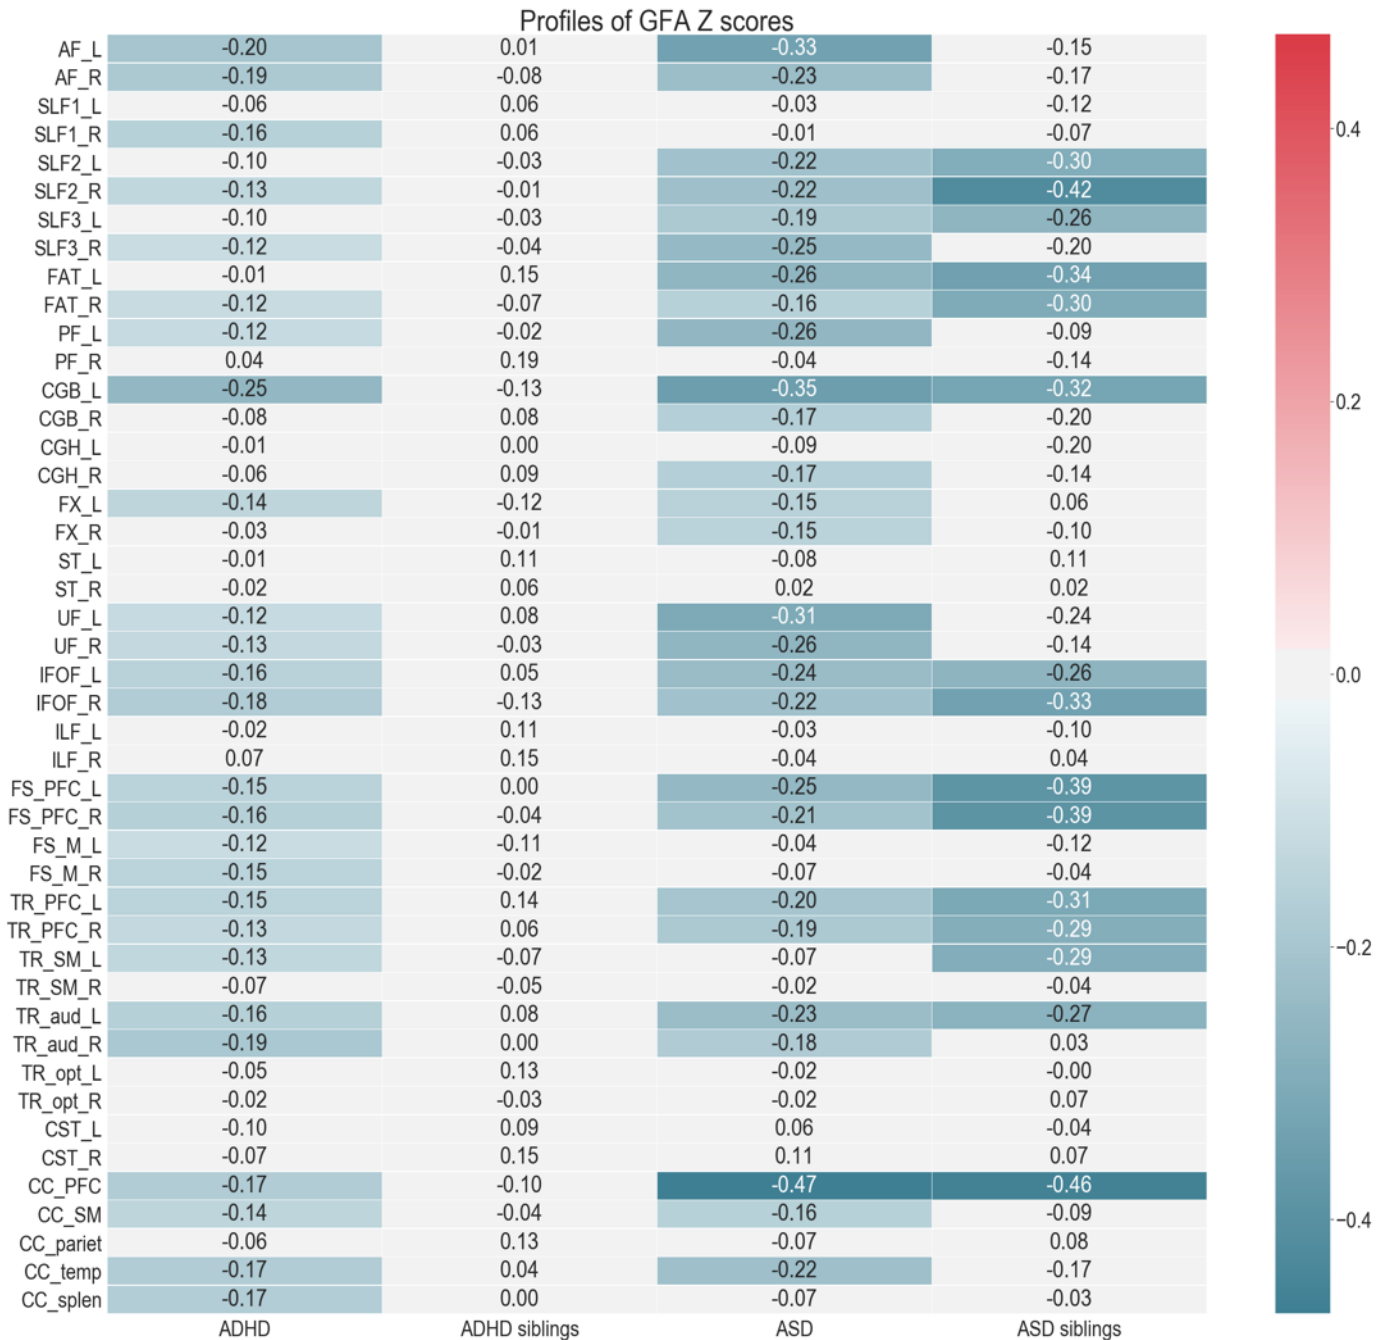

### Figure S8. GFA Z-score deviation profiles of children and adults with attention-deficit/hyperactivity disorder or autism spectrum disorder.

Scores that did not pass multiple testing using the Benjamini–Hochberg procedure (FDR = 0.05) were masked. The color gradient encodes the Z-score effect size; cyan indicates a negative effect size, and red indicates a positive effect size. For complete tract names, please refer to Table S1.

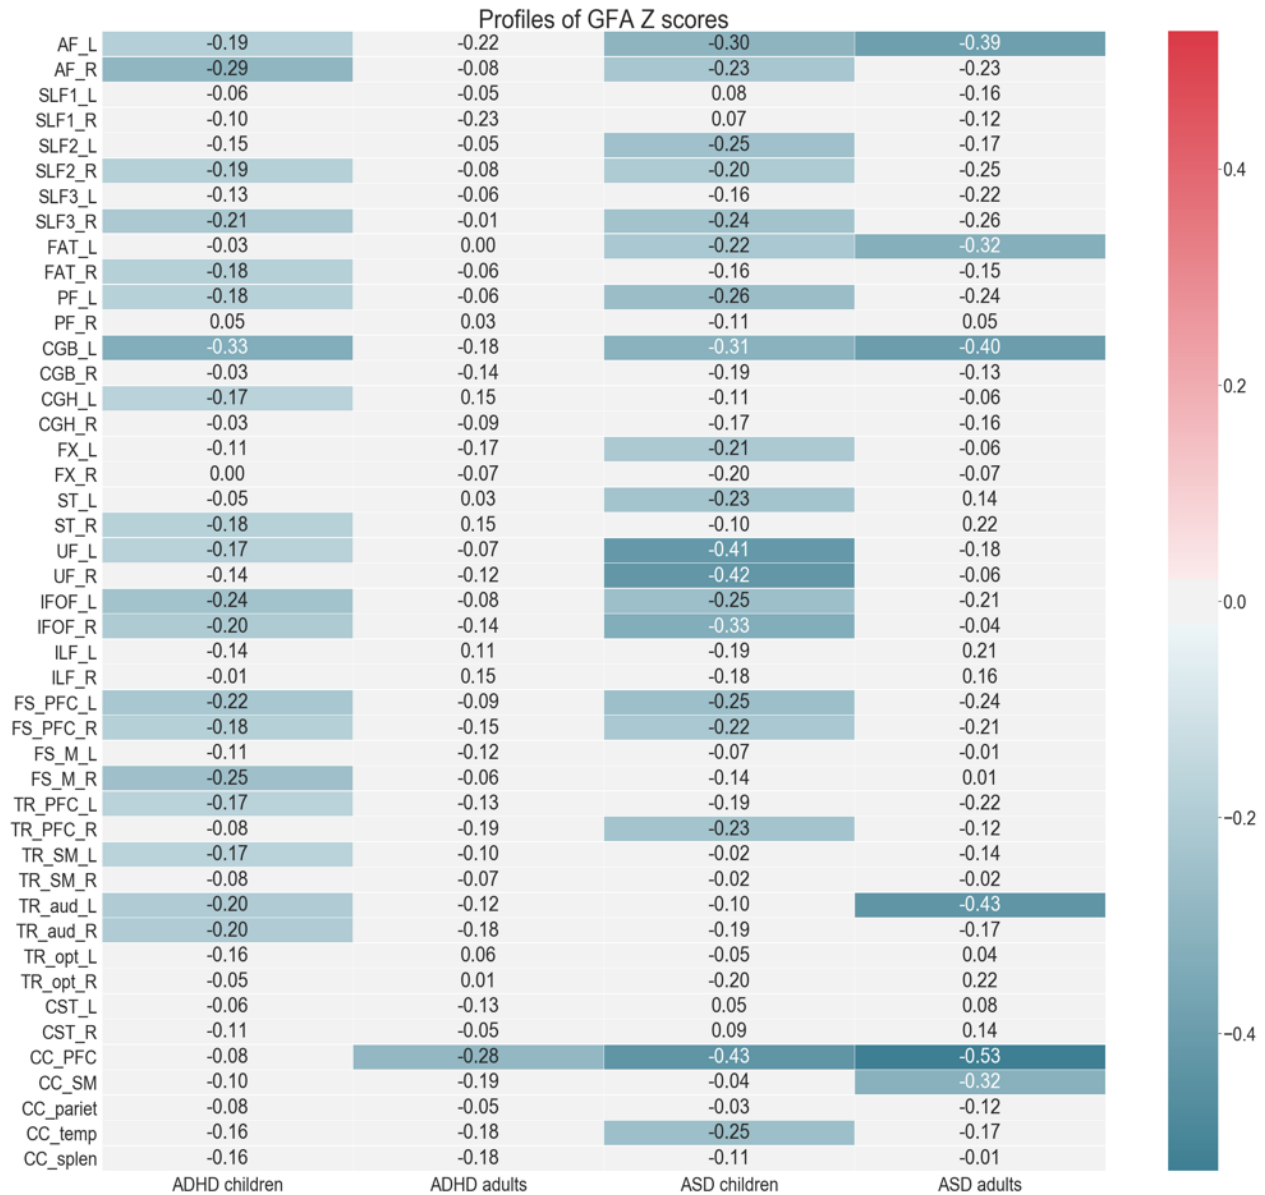

## Figure S9. Sex-specific GFA Z-score deviation profiles.

Scores that did not pass multiple testing using the Benjamini–Hochberg procedure (FDR = 0.05) were masked. The color gradient encodes the Z-score effect size; cyan indicates a negative effect size, and red indicates a positive effect size. For complete tract names, please refer to Table S1.

(A) GFA Z-scores for male participants (B) GFA Z-scores for female participants.

### A. Profiles of GFA Z scores for male

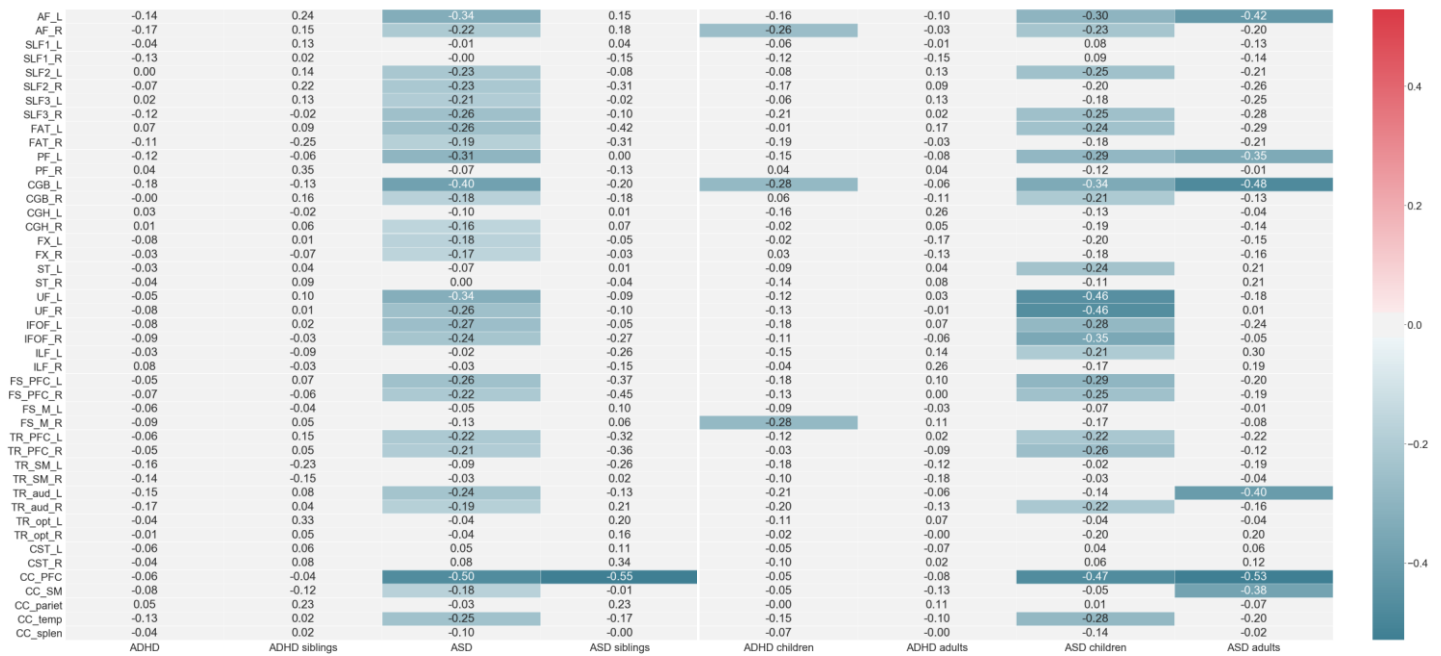

### B. Profiles of GFA Z scores for female

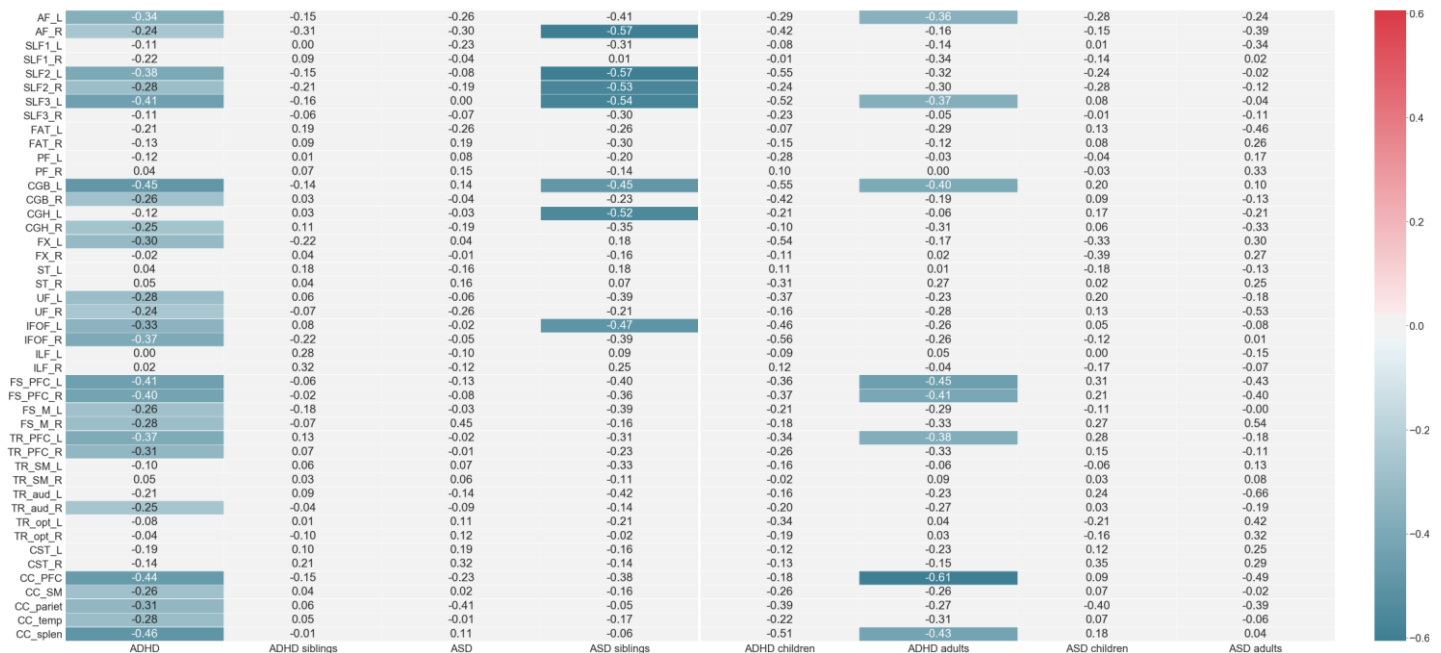

**Figure S10. GFA Z-score idiosyncrasy profiles of people with attention-deficit/hyperactivity disorder, autism spectrum disorder, and their unaffected siblings.**

Scores that did not pass multiple testing using the Benjamini–Hochberg procedure (FDR = 0.05) were masked. The color gradient encodes Z-score variance ratio of the clinical group over typically developed controls; cyan indicates a negative effect size, and red indicates a positive effect size. For complete tract names, please refer to Table S1.

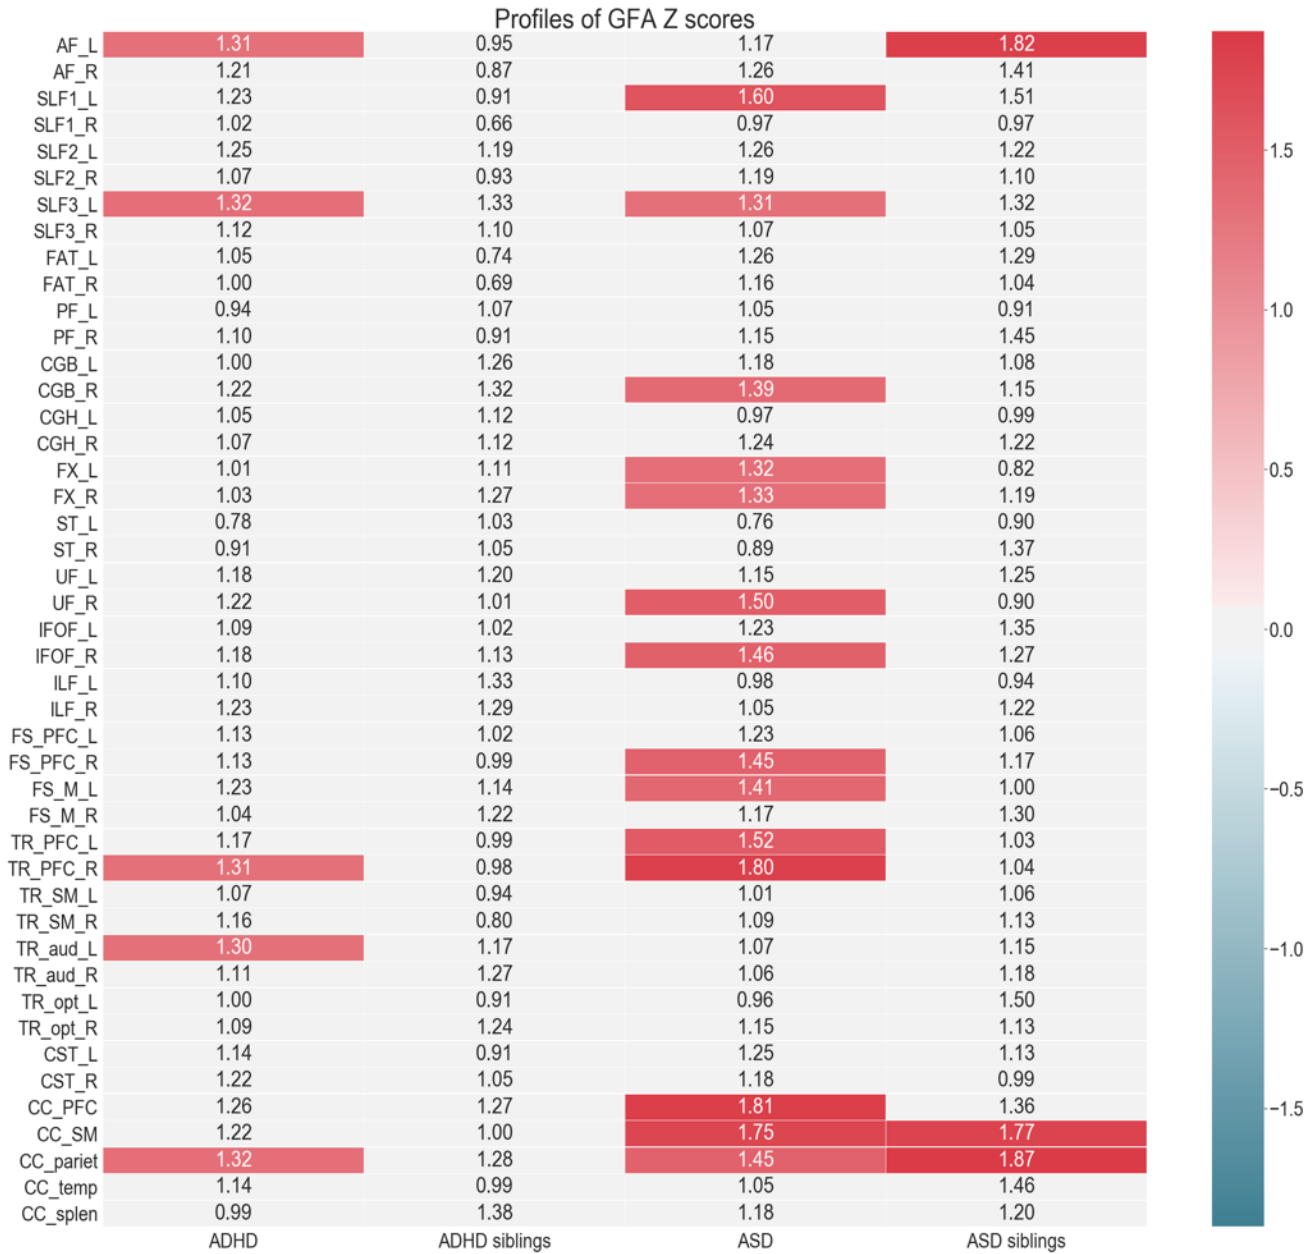

### Figure S11. GFA Z-score idiosyncrasy profiles of children and adults with attention-deficit/hyperactivity disorder or autism spectrum disorder.

Scores that did not pass multiple testing using the Benjamini–Hochberg procedure (FDR = 0.05) were masked. The color gradient encodes Z-score variance ratio of clinical group over typically developed controls; cyan indicates a negative effect size, and red indicates a positive effect size. For complete tract names, please refer to Table S1.

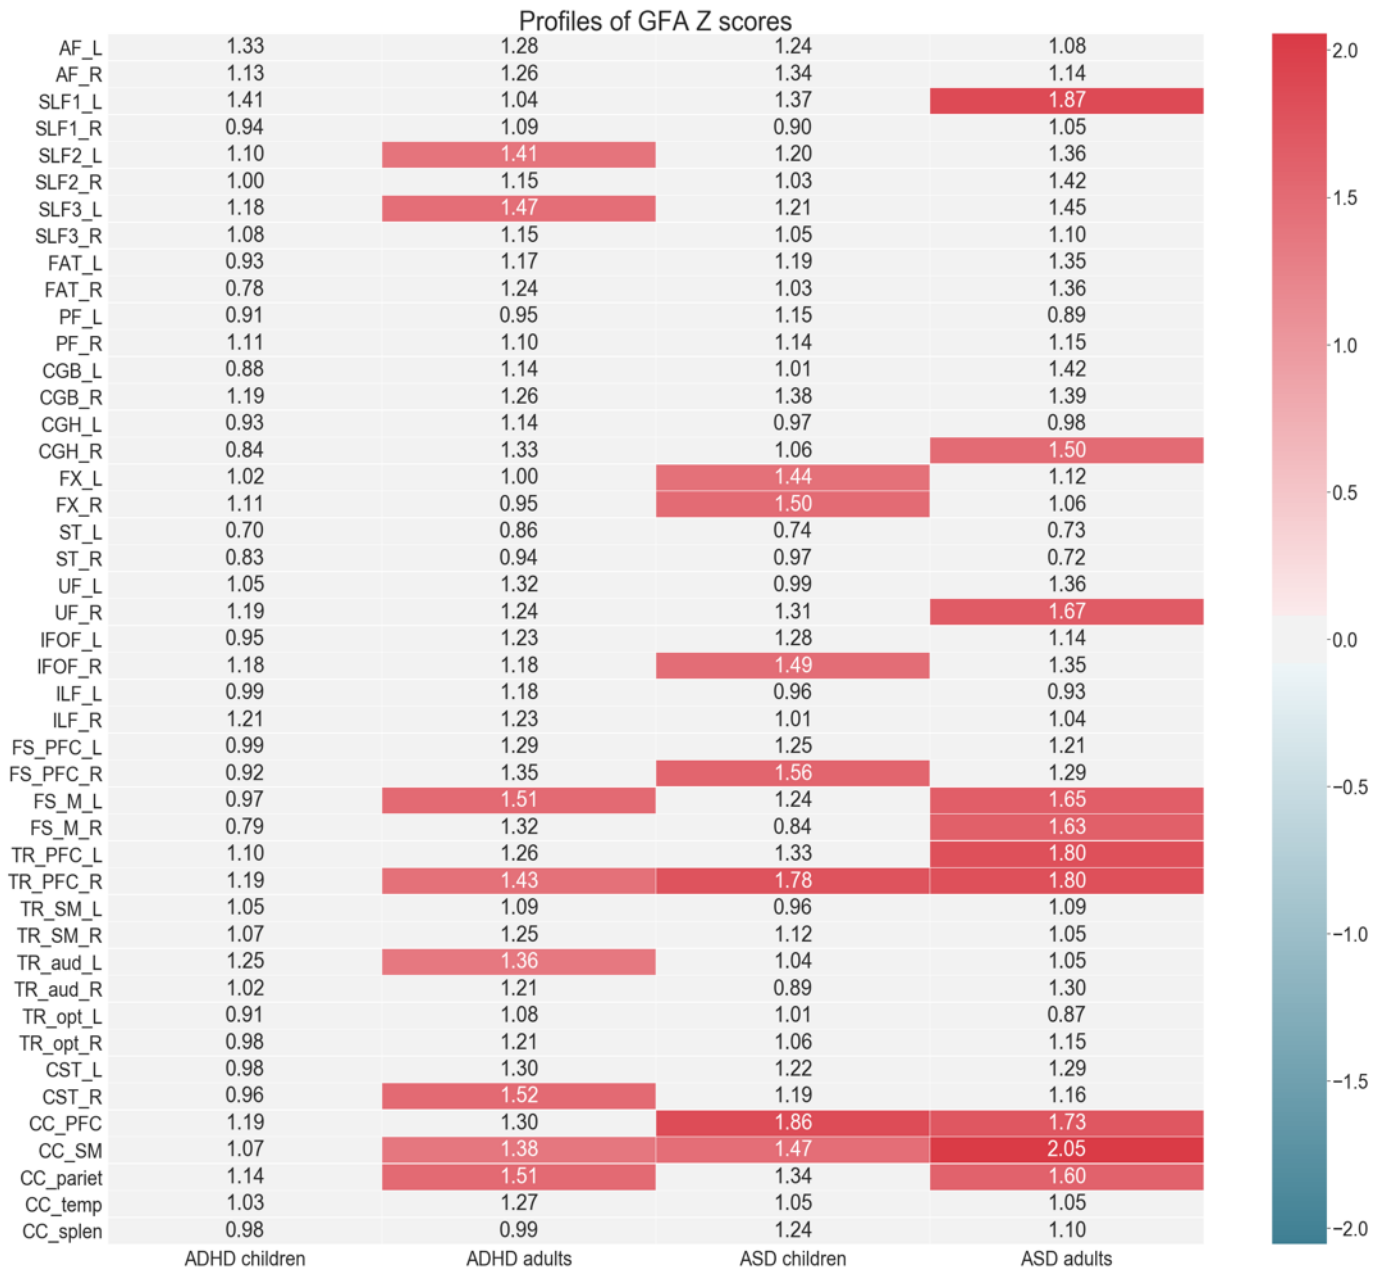



## Figure S12. The impact of image quality on the deviation pattern

All images included in the analysis have passed the stringent quality control procedure in this study. Of those images which passed quality assurance, the 5% and 10% images with the worst quality (lowest SNR or largest signal dropout counts) were removed. The Z-score mean deviation pattern was calculated for each clinical group and compared with the original values calculated with the full sample. The results were highly correlated with the original ones with a correlation of over 0.90.

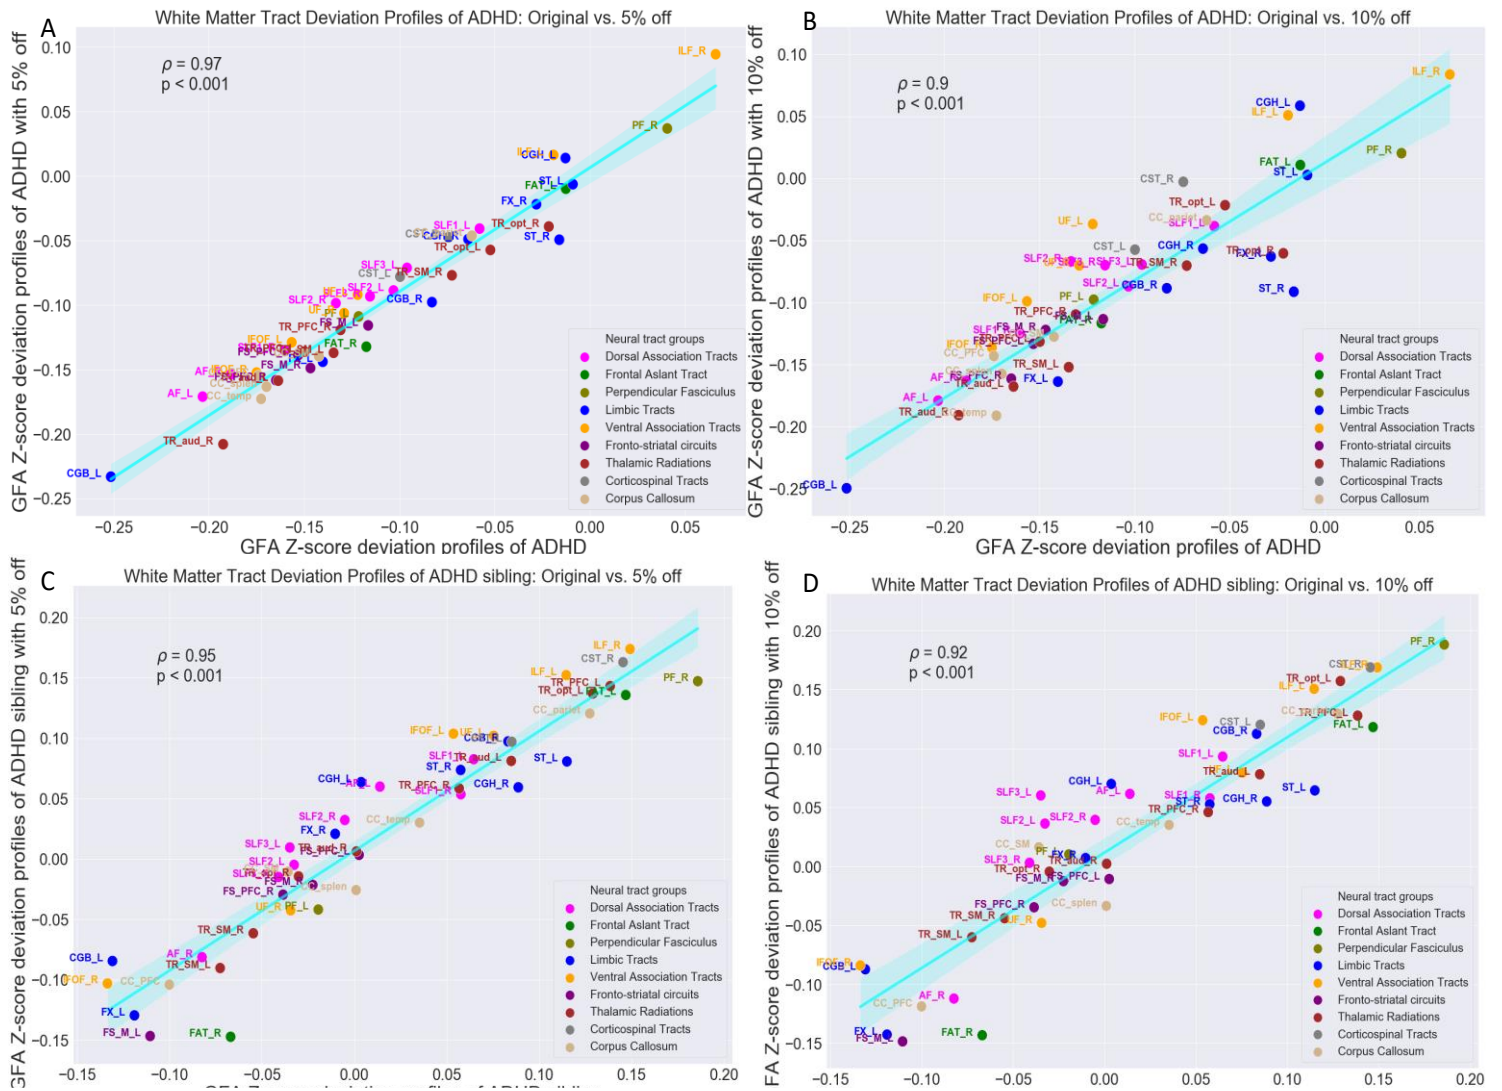



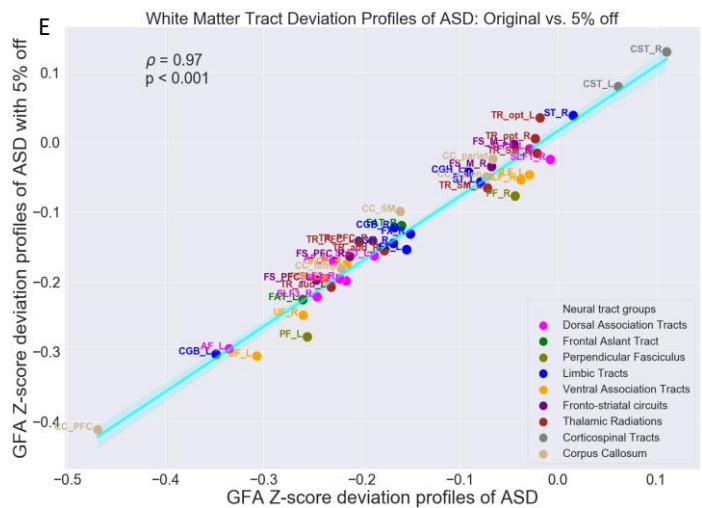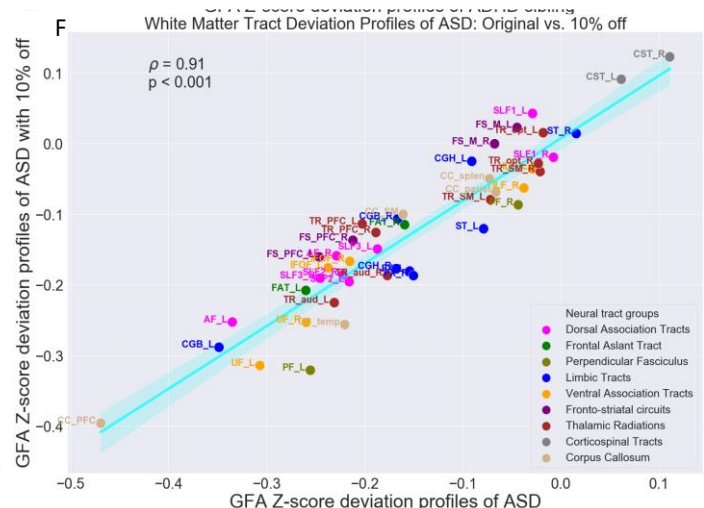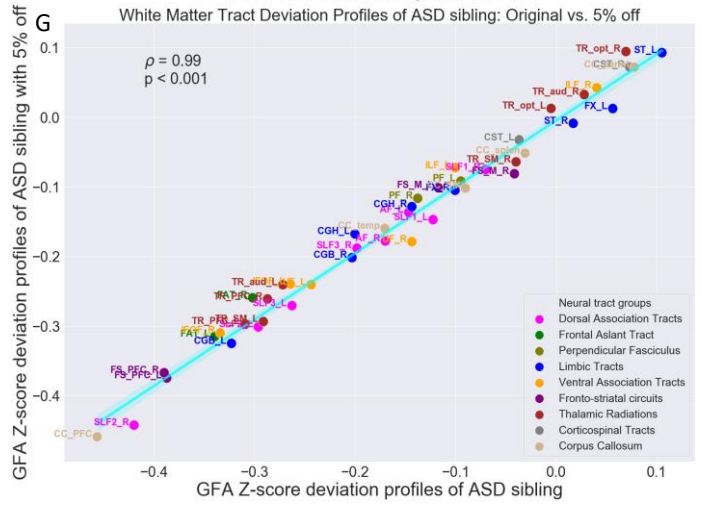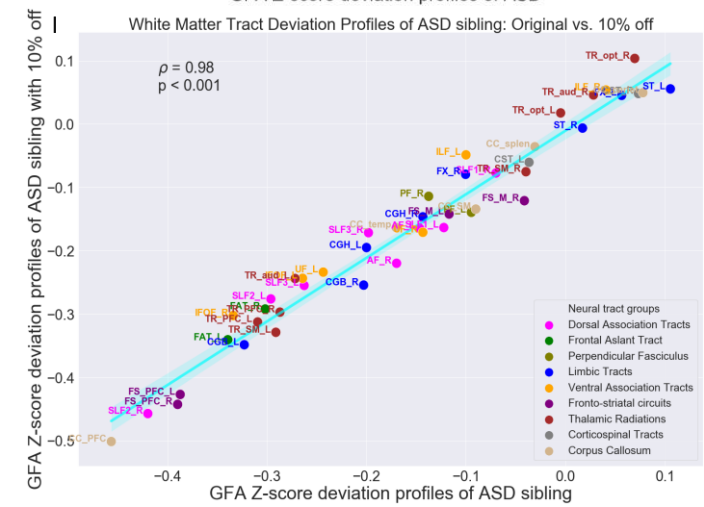

### Figure S13. The impact of image quality on the idiosyncrasy pattern

All images included in the analysis have passed the stringent quality control procedure in this study. Of those images which passed quality assurance, the 5% and 10% images with the worst quality (lowest SNR or largest signal dropout counts) were removed. The Z-score idiosyncrasy pattern was calculated for each clinical group and compared with the original values calculated with the full sample. The results were highly correlated with the original ones with a correlation of over 0.80.

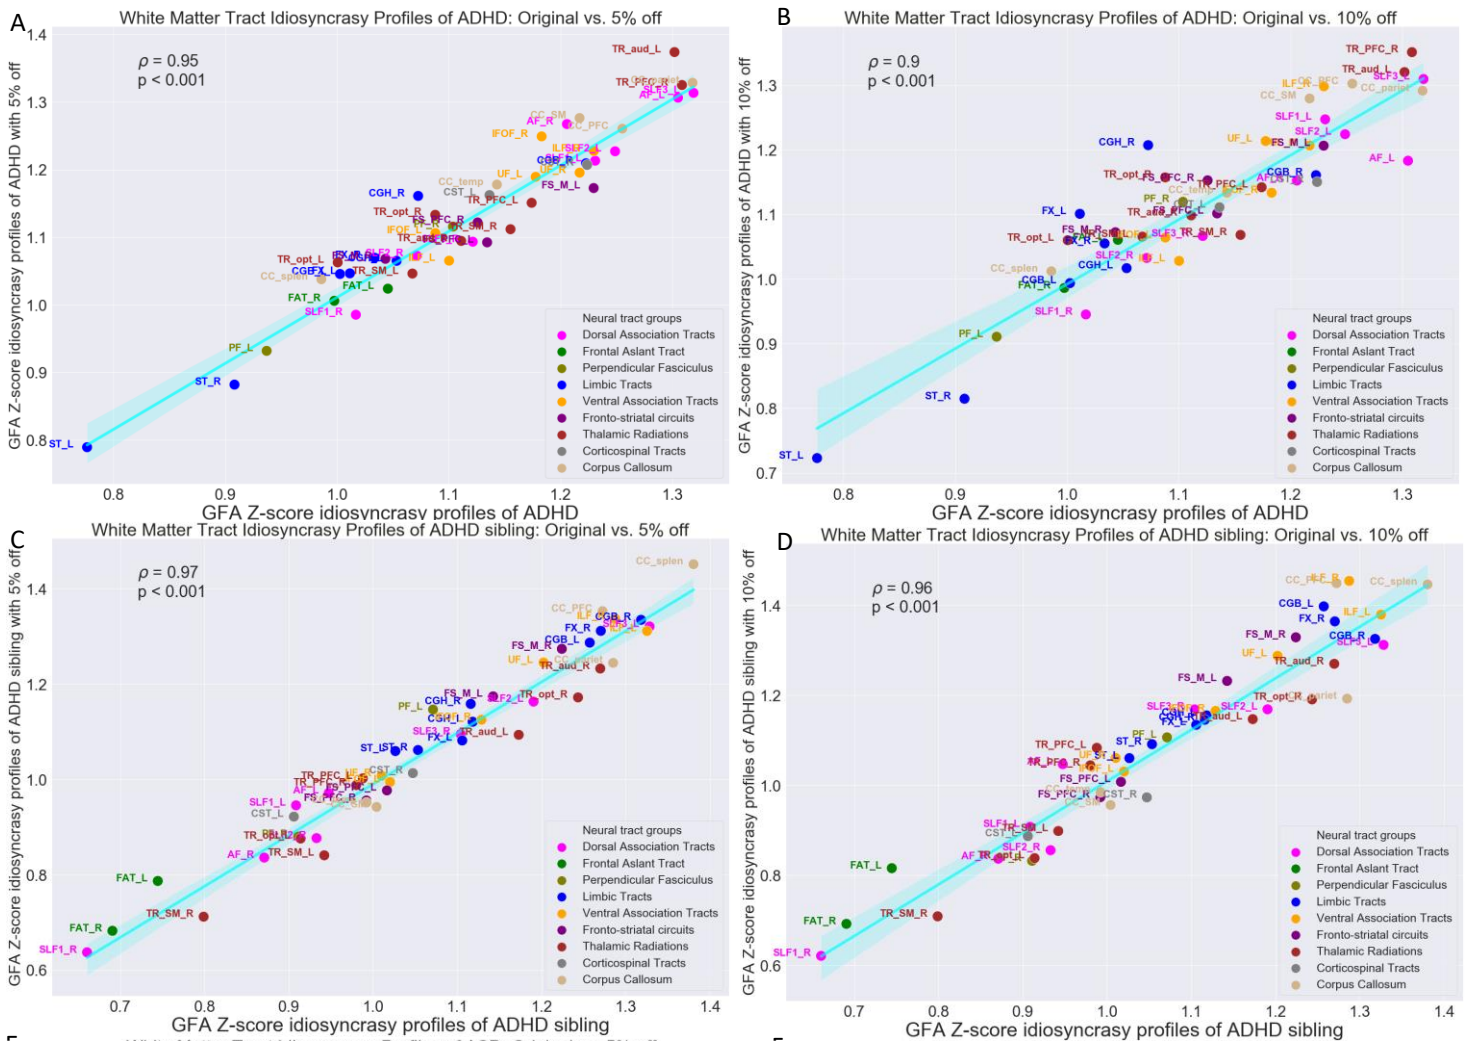

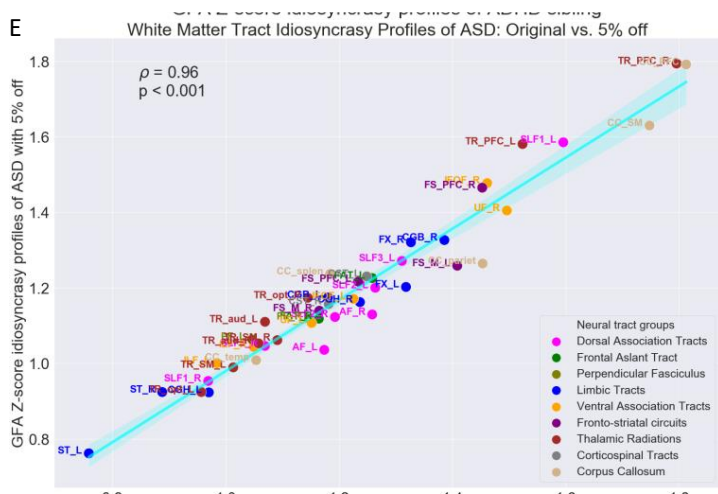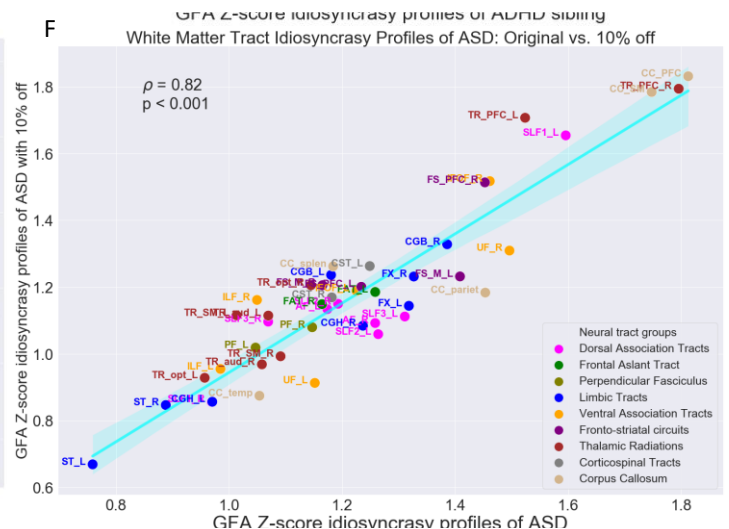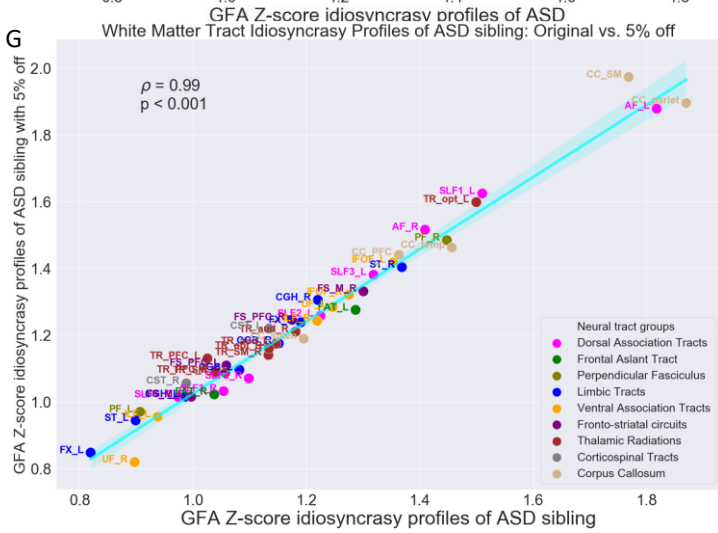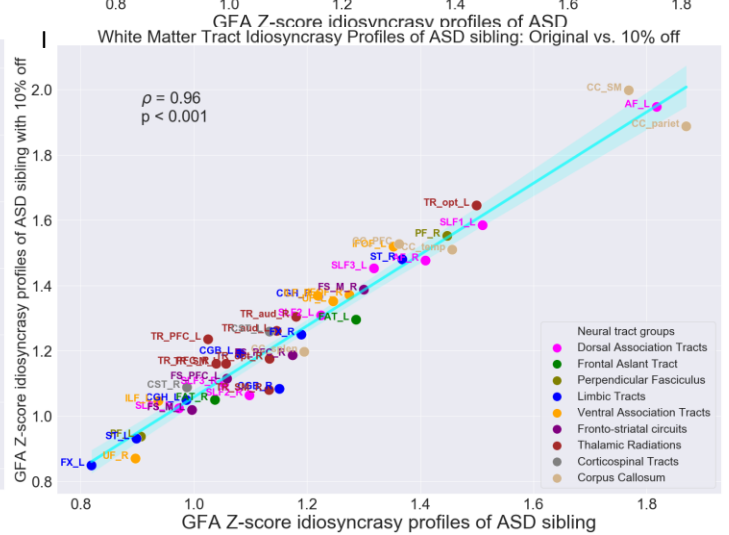

**Figure S14. GFA Z-score deviation profiles of people with autism spectrum disorder with or without comorbid attention-deficit/hyperactivity disorder.**

Scores that did not pass multiple testing using the Benjamini–Hochberg procedure (FDR = 0.05) were masked. The color gradient encodes Z-score effect size; cyan indicates a negative effect size, and red indicates a positive effect size. For complete tract names, please refer to Table S1.

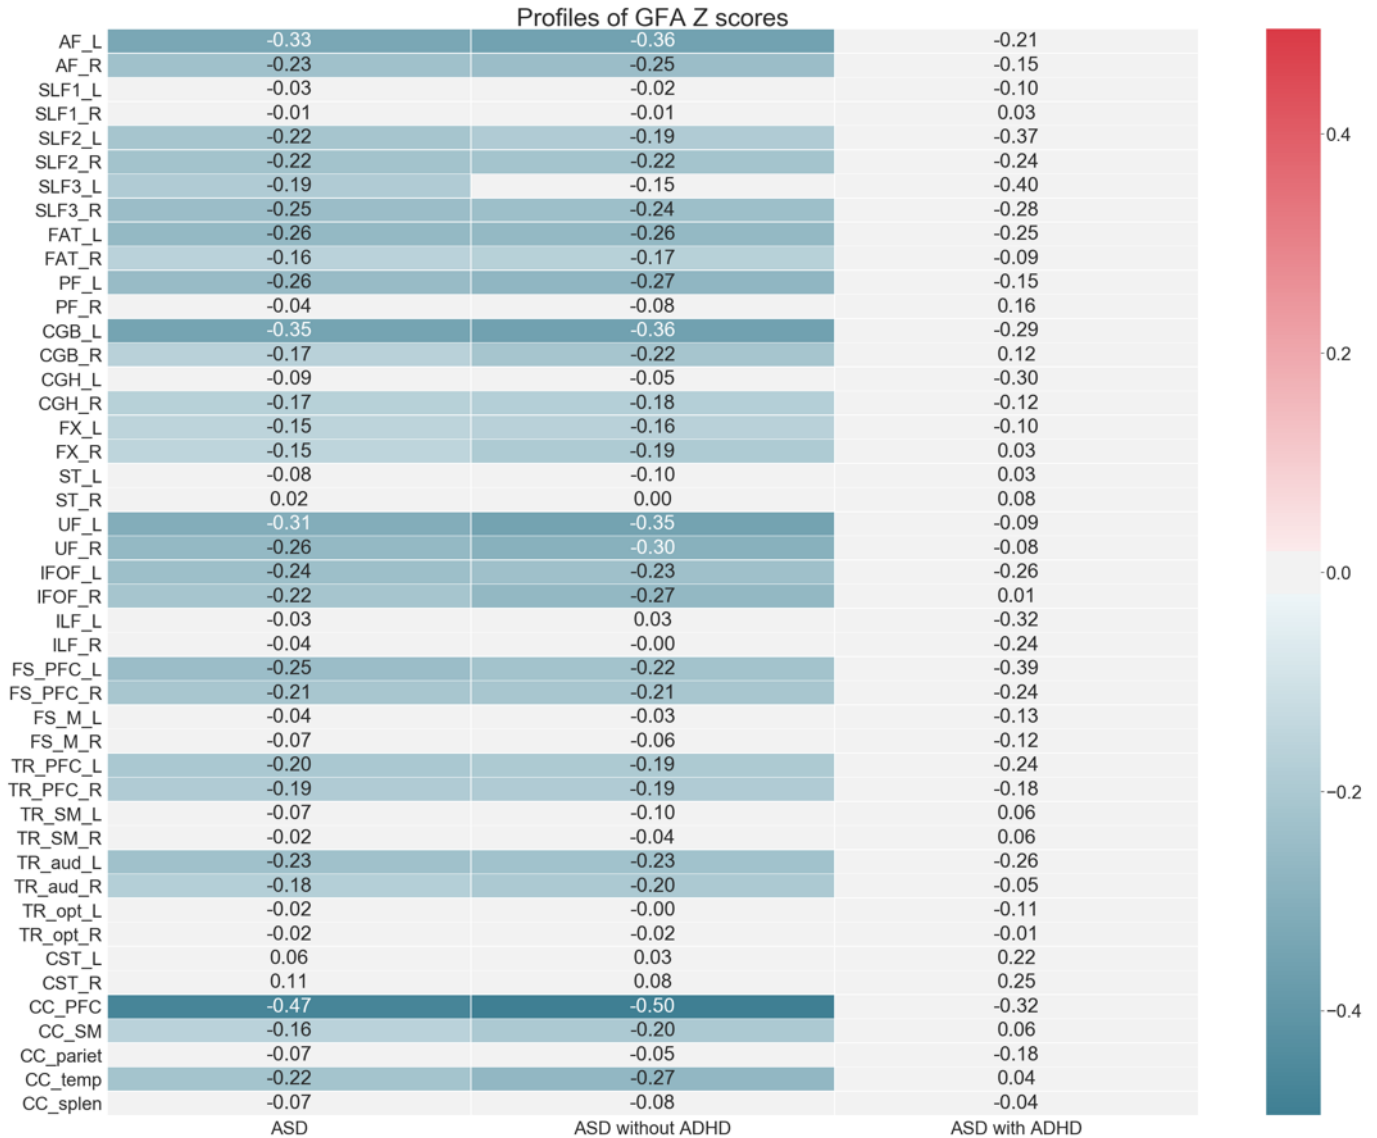

**Figure S15. GFA Z-score idiosyncrasy profiles of people with autism spectrum disorder with or without comorbid attention-deficit/hyperactivity disorder.**

Scores that did not pass multiple testing using the Benjamini–Hochberg procedure (FDR = 0.05) were masked. The color gradient encodes Z-score effect size; cyan indicates a negative effect size, and red indicates a positive effect size. For complete tract names, please refer to Table S1.

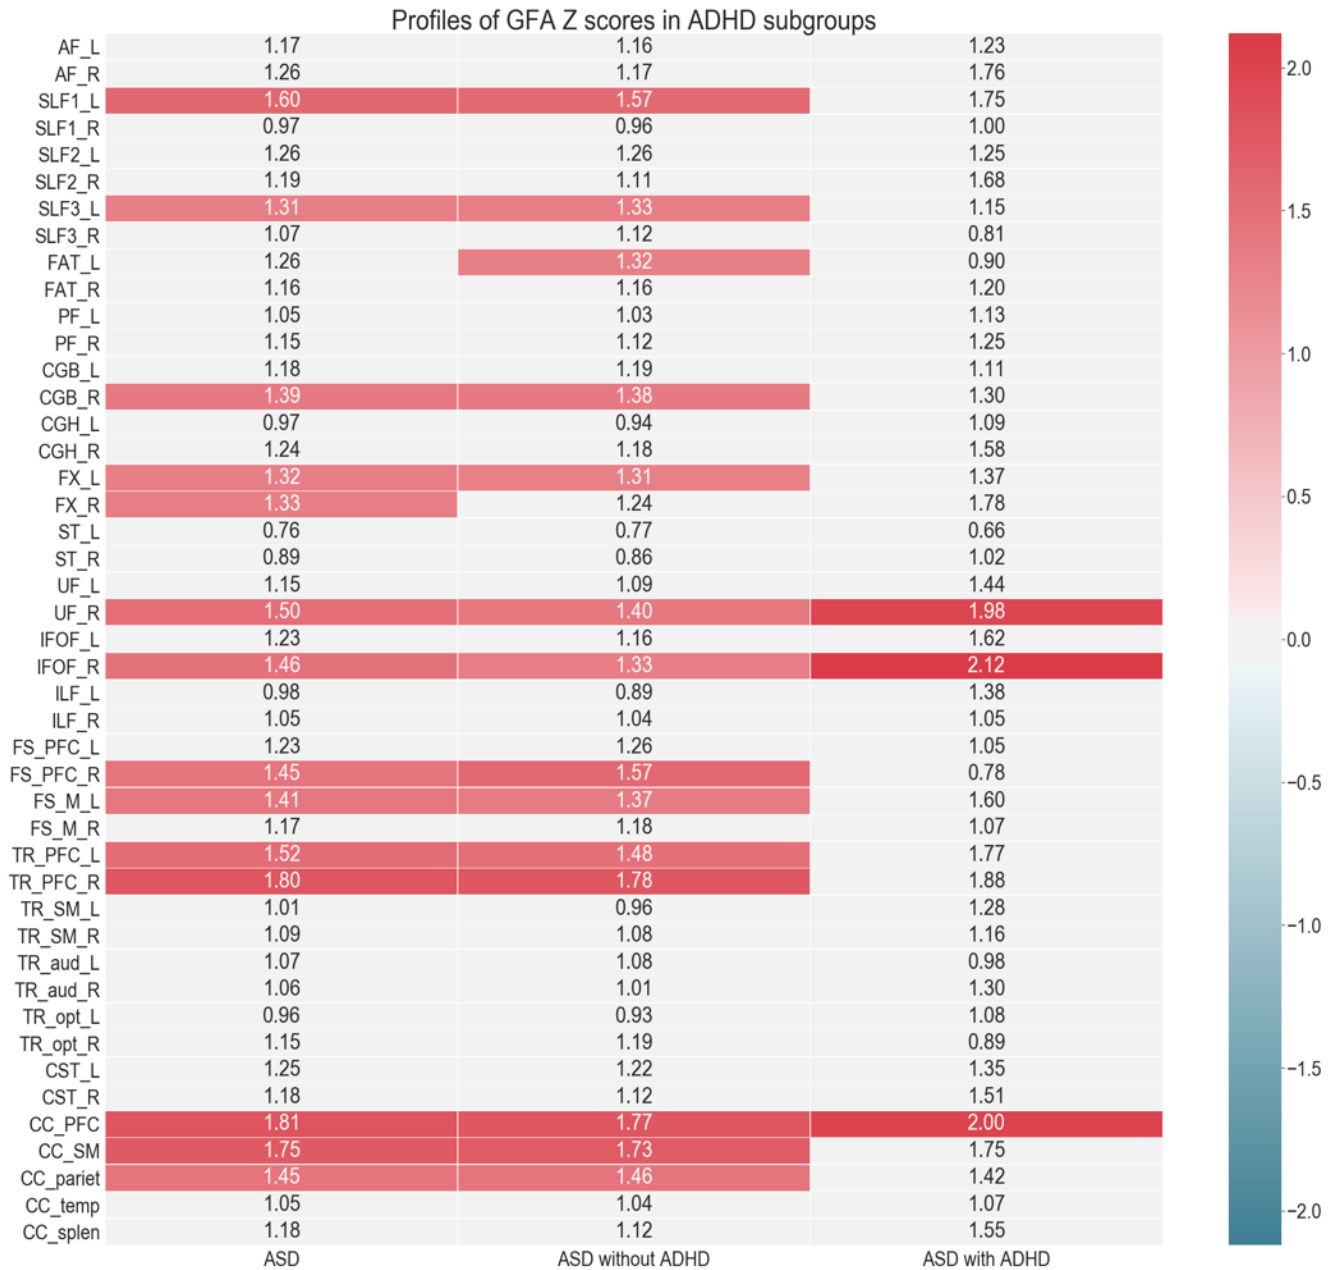



**Figure S16. High correlation between people with autism spectrum disorder with or without comorbid attention-deficit/hyperactivity disorder in terms of GFA Z-score deviation and idiosyncrasy profile.**

A high correlation between all people with ASD and those with comorbid ADHD in terms of (A) deviation profile ( $\rho=0.54$ ) and (B) idiosyncrasy profile ( $\rho=0.66$ ). A very high correlation between all people with ASD and those without comorbid ADHD in terms of (C) deviation profile ( $\rho=0.96$ ) and (D) idiosyncrasy profile ( $\rho=0.96$ ). A high correlation between people with ASD with and without comorbid ADHD in terms of (E) deviation profile ( $\rho=0.31$ ) and (F) idiosyncrasy profile ( $\rho=0.48$ ).

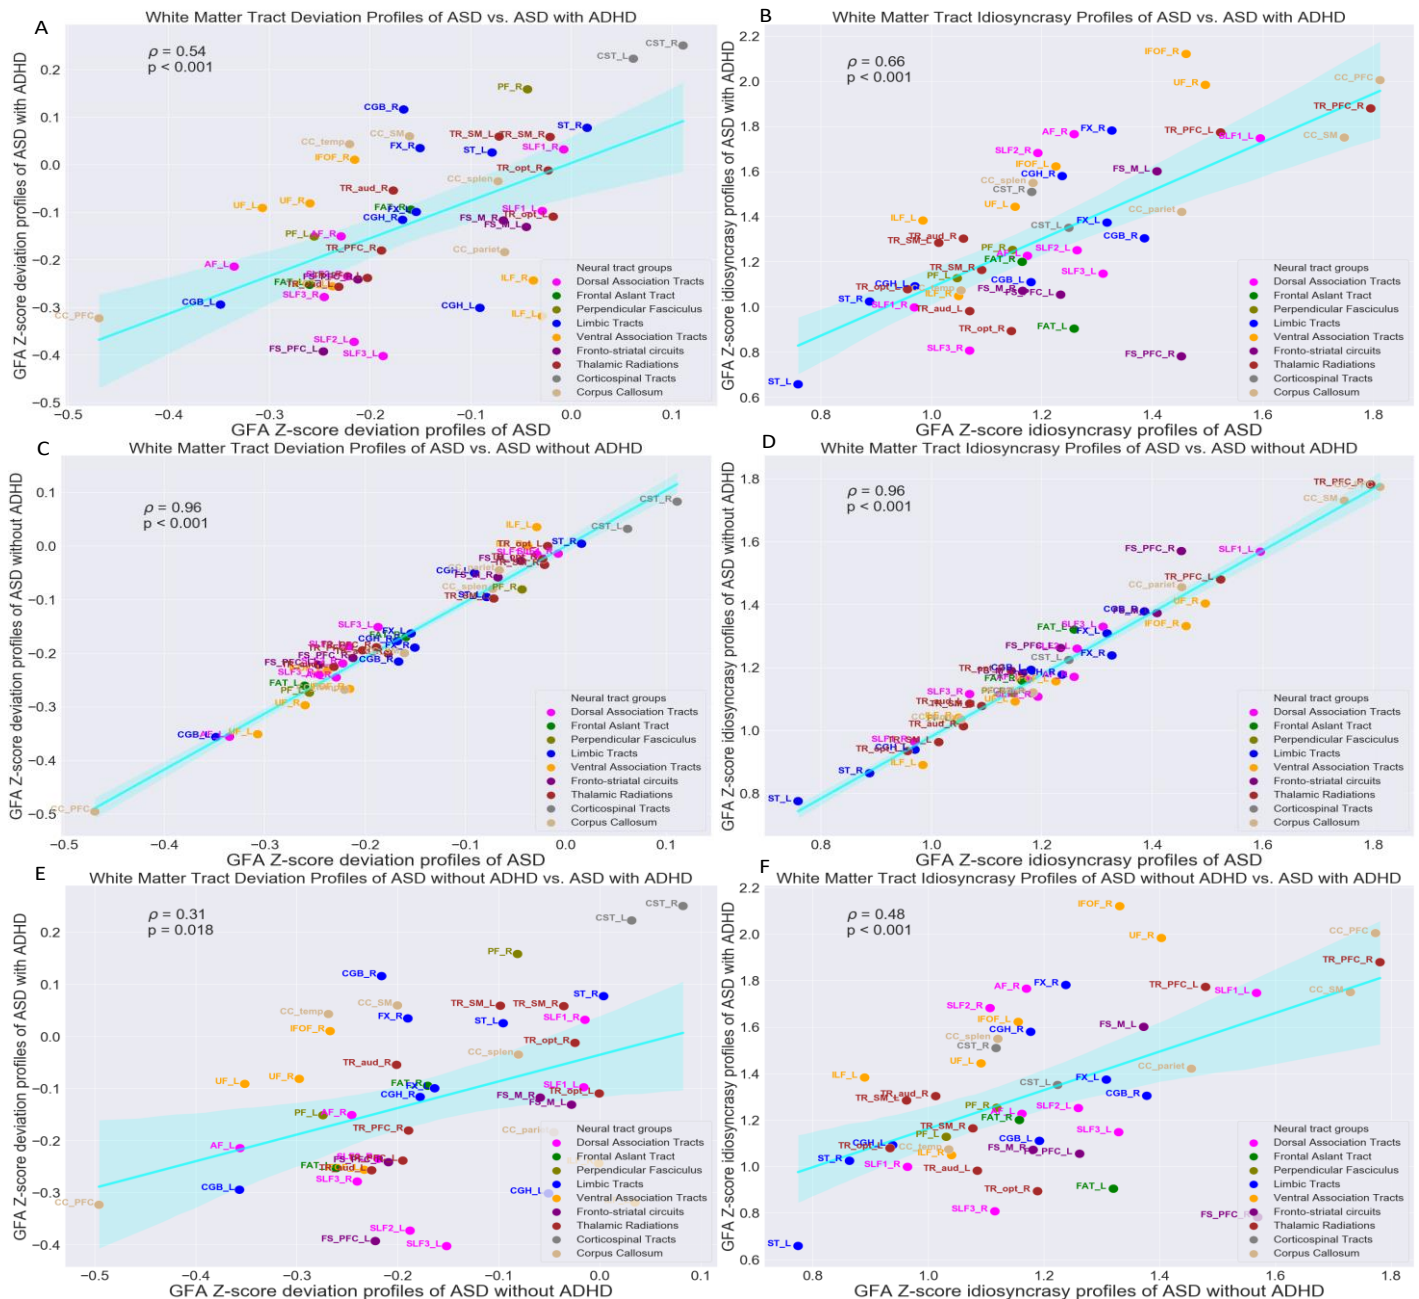

## Figure S17. Symptom-based clustering of probands and siblings.

(A) Ward's hierarchical clustering yield two clusters, cluster 1 (M/F) (ADHD: 156/53; ADHD sibling: 40/53; ASD: 84/6; ASD sib: 36/34) and cluster 2 (M/F) (ADHD: 49/21; ADHD sibling: 16/12; ASD: 74/11; ASD sib: 2/0). (B) The optimal number of clusters has been validated by Silhouette's width. Silhouette's width of K-means, K-medoids also indicate 2 as the optimal cluster number. (C) The deviation profile and (D) idiosyncrasy profile of the two clusters. High correlation between the two clusters in terms of (E) the deviation profile ( $\rho=0.68$ ) and (F) idiosyncrasy profile ( $\rho=0.49$ ).

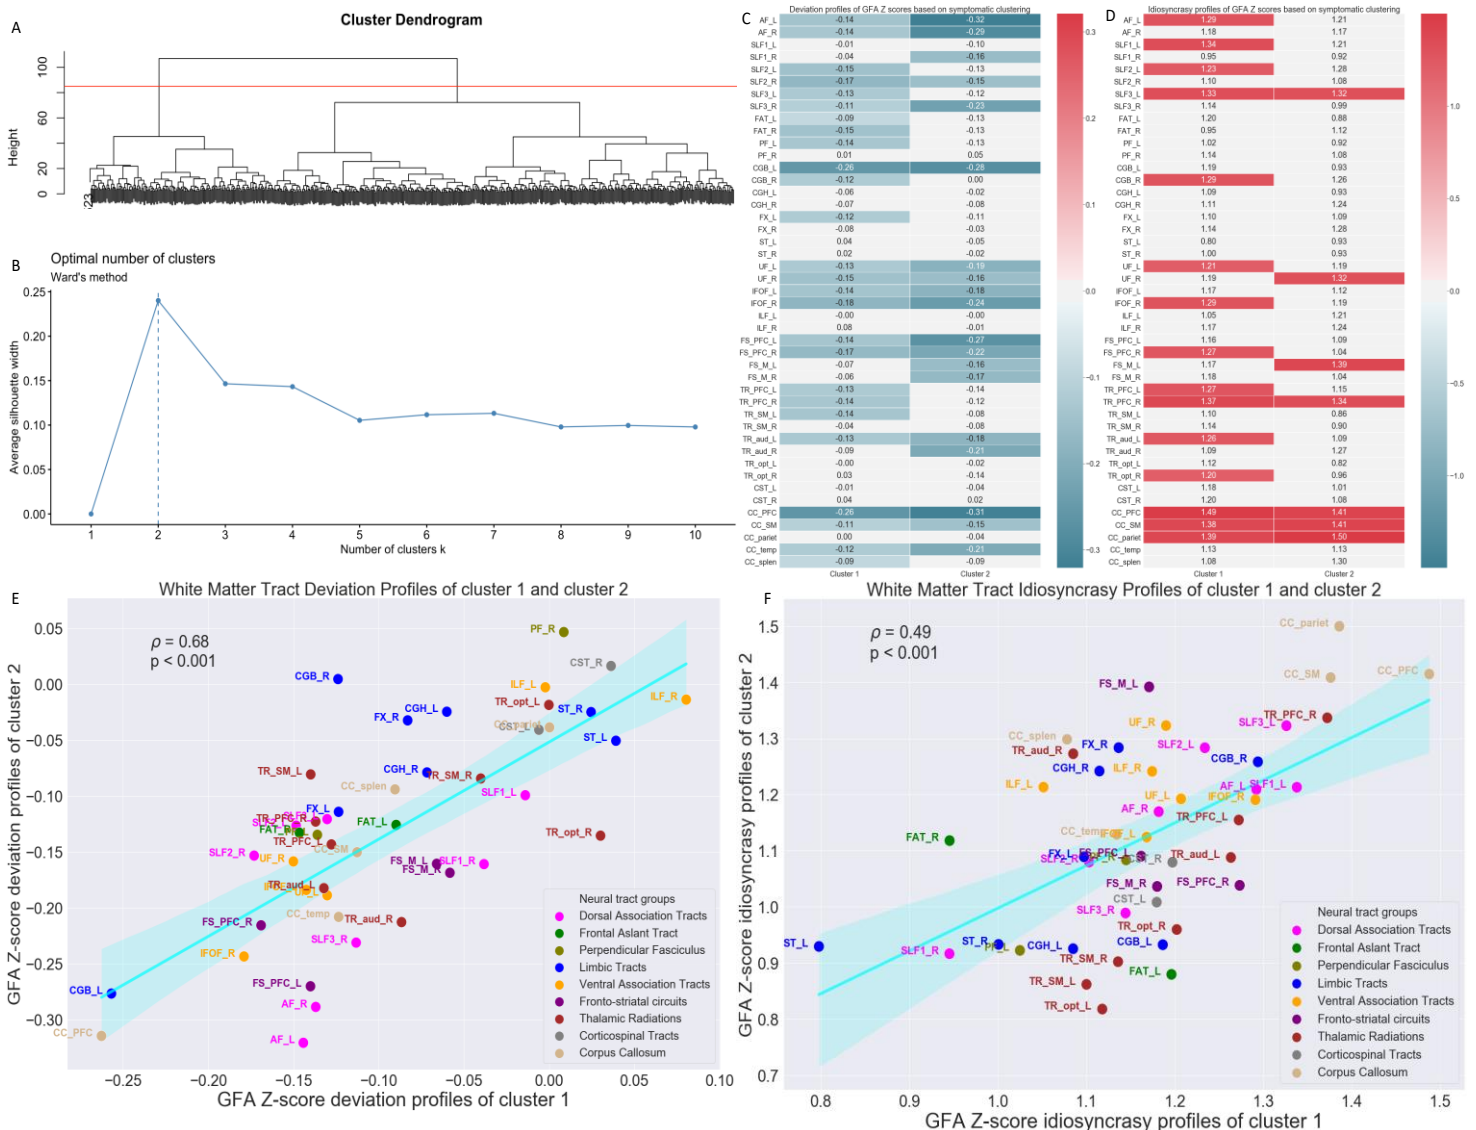

### Figure S18. Canonical correlation analysis (CCA) between GFA Z-scores and symptom assessment (2<sup>nd</sup> mode; 1<sup>st</sup> mode in Figure 3A)

Canonical correlation analysis (CCA) between GFA Z-scores and symptom assessment, including Autism Spectrum Quotient (AQ), Social Response Scale (SRS), and the Swanson, Nolan, and Pelham Teacher and Parent Rating Scale-IV (SNAP-IV). For complete white matter tract names, please refer to Table S1.

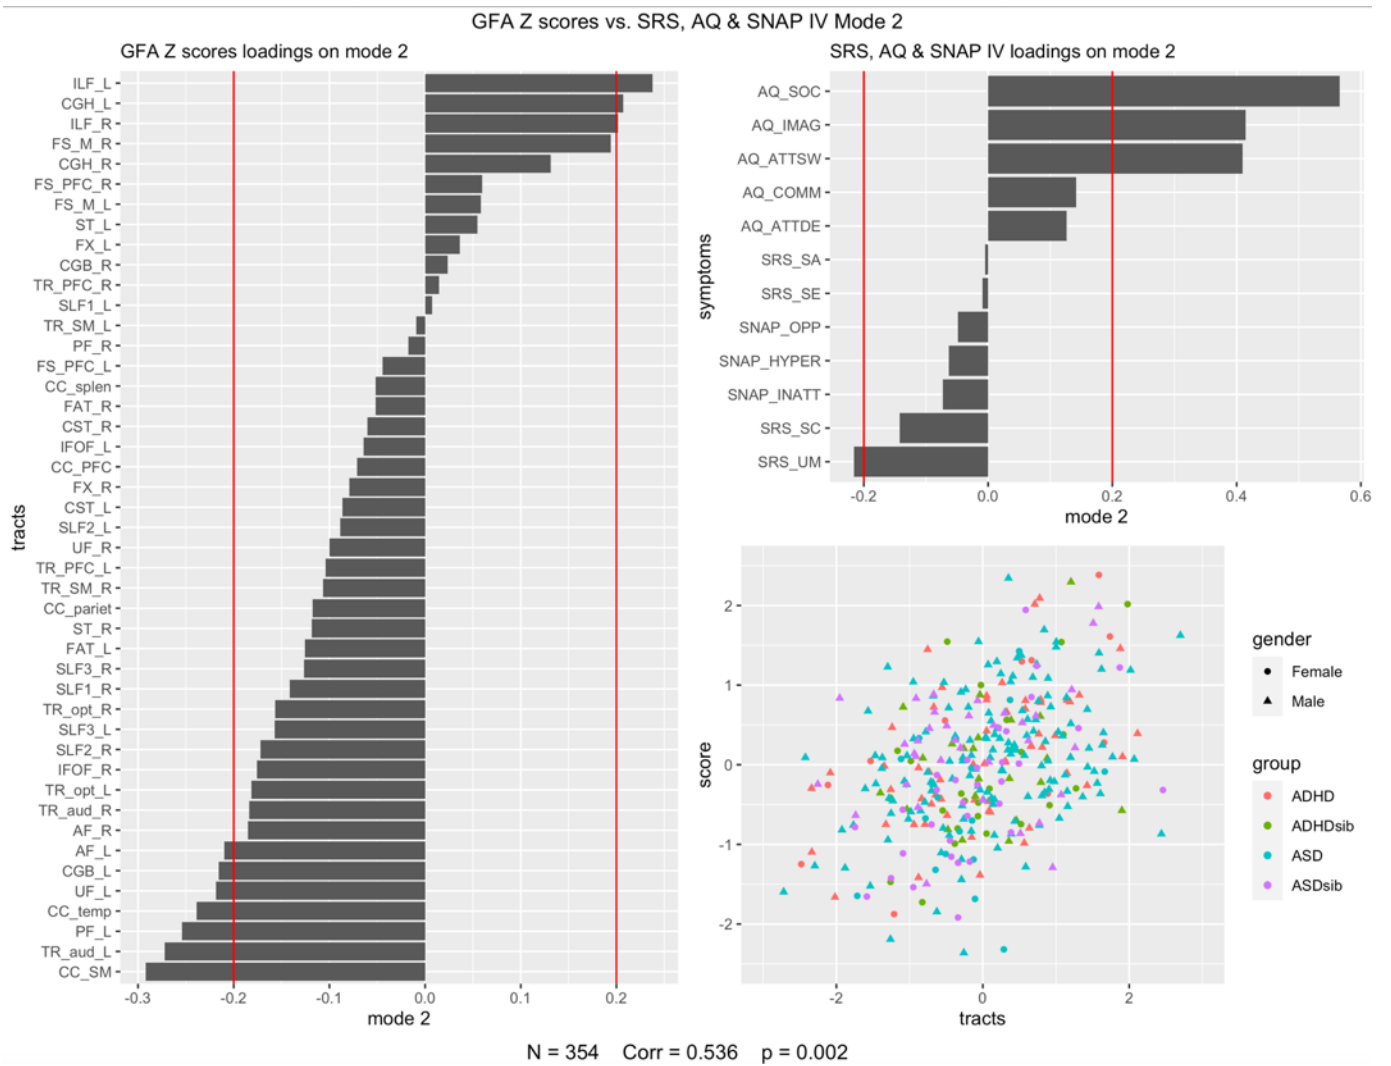



**Figure S19. Canonical correlation analysis (CCA) between GFA Z-scores and neuropsychological assessment (the remaining 4 modes in addition to the 1<sup>st</sup> mode shown in Figure 3B).**

Canonical correlation analysis (CCA) between diffusion indices Z-scores and neuropsychological assessment, including Cambridge Neuropsychological Test Automated Battery (CANTAB) and Conner’s continuous performance test (CCPT). Wechsler Intelligence Scales were also included. Because of the orthogonality of CCA, each mode exhibited a distinct correlation with different cognitive aspects and white matter tracts. For complete white matter tract names, please refer to Table S1. For a complete list of CCPT and CANTAB items, please refer to Table S3 and Table S4, respectively.

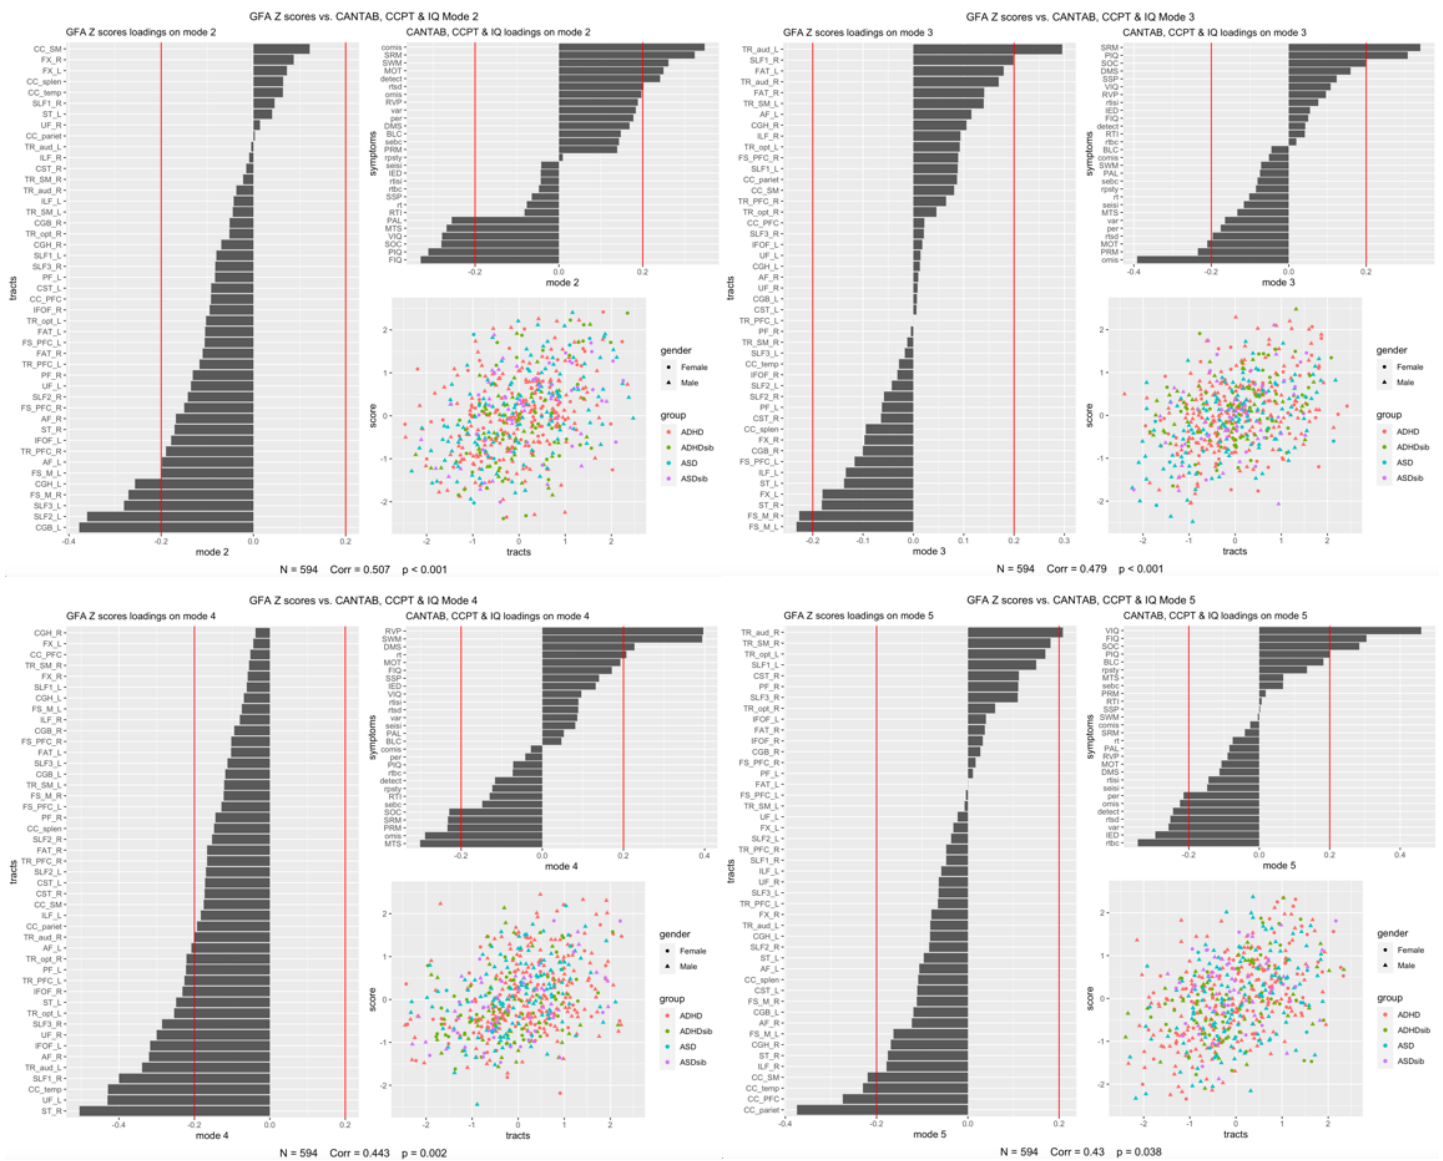

**Figure S20. Permutation test of each mode in canonical correlation analysis.**

The parametric test for significance of CCA modes with Wilks' lambda (122), and checked with permutation tests as your suggestion (123). We used a strict policy for determining the significance that each mode should pass both parametric and permutation significance tests. The permutation test was done with 999 permutations, and the p-value was determined by (number of permutation more significant than real value + 1) / (999 + 1). A p-value of 0.001 means that no permutation was more significant than the real value.

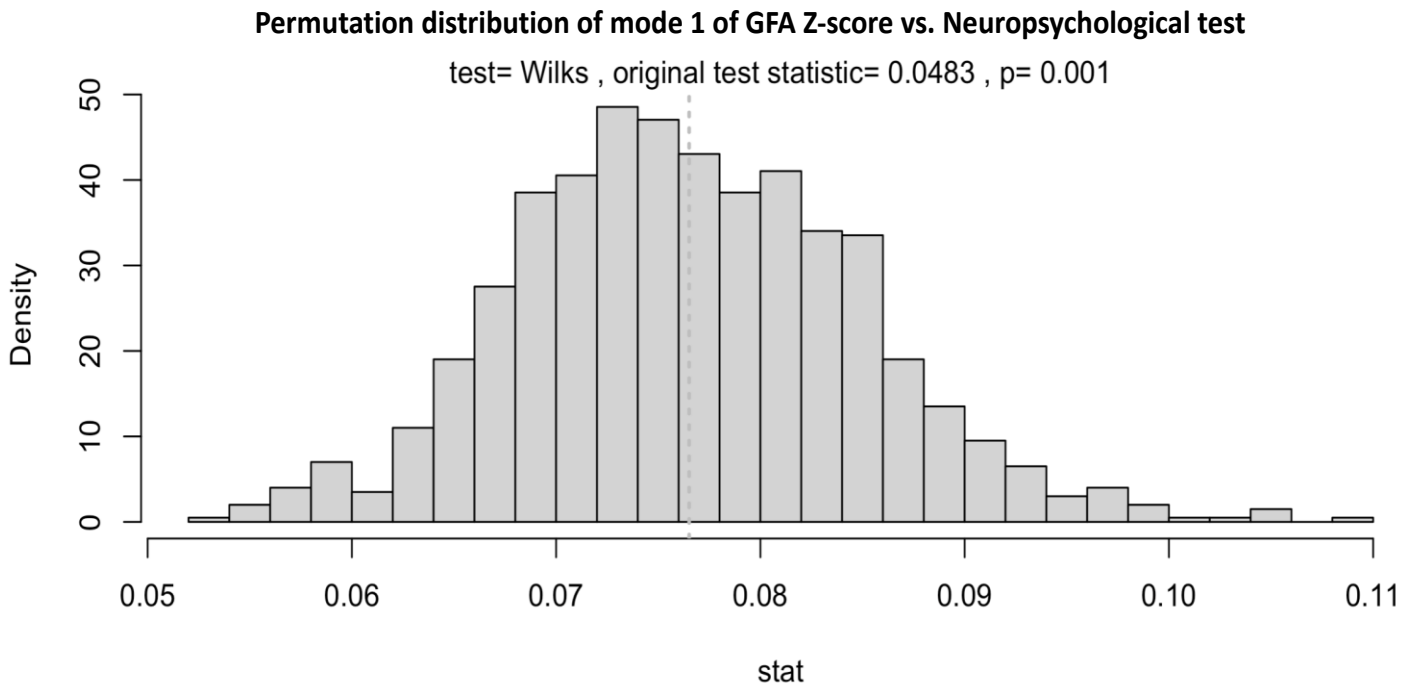

| Symptoms or NPT | Mode | P-value | Permutation p-value |
|-----------------|------|---------|---------------------|
| Symptoms        | 1    | <0.001  | 0.003               |
| Symptoms        | 2    | 0.002   | 0.004               |
| NPT             | 1    | <0.001  | 0.001               |
| NPT             | 2    | <0.001  | 0.001               |
| NPT             | 3    | <0.001  | 0.001               |
| NPT             | 4    | 0.002   | 0.001               |
| NPT             | 5    | 0.038   | 0.001               |

**Figure S21. Diffusion indices Z-score profiles of people with attention-deficit/hyperactivity disorder, autism spectrum disorder, and their unaffected siblings.**

(A) mean diffusivity (MD), (B) radial diffusivity (RD), and (C) axial diffusivity (AD). Scores that did not pass multiple testing using the Benjamini–Hochberg procedure (FDR = 0.05) were masked. The color gradient encodes Z-score effect size; cyan indicates a negative effect size, and red indicates a positive effect size. For complete tract names, please refer to Table S1

**(A) MD Z-score profiles**

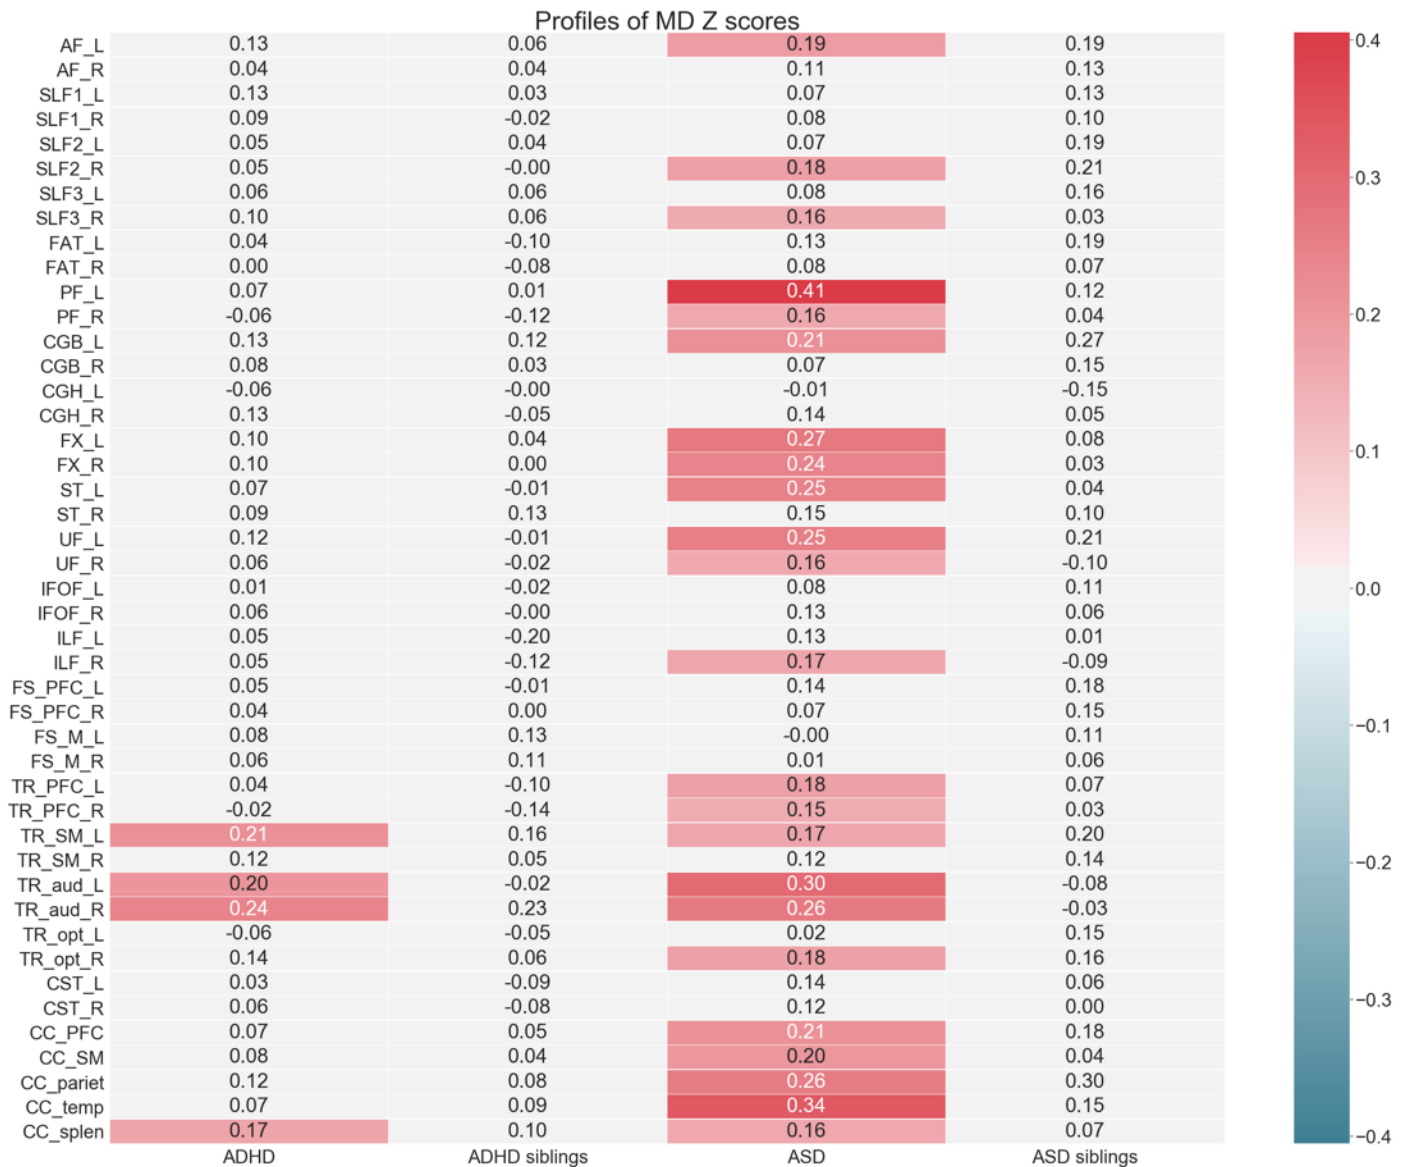

**(B) RD Z-score profiles**

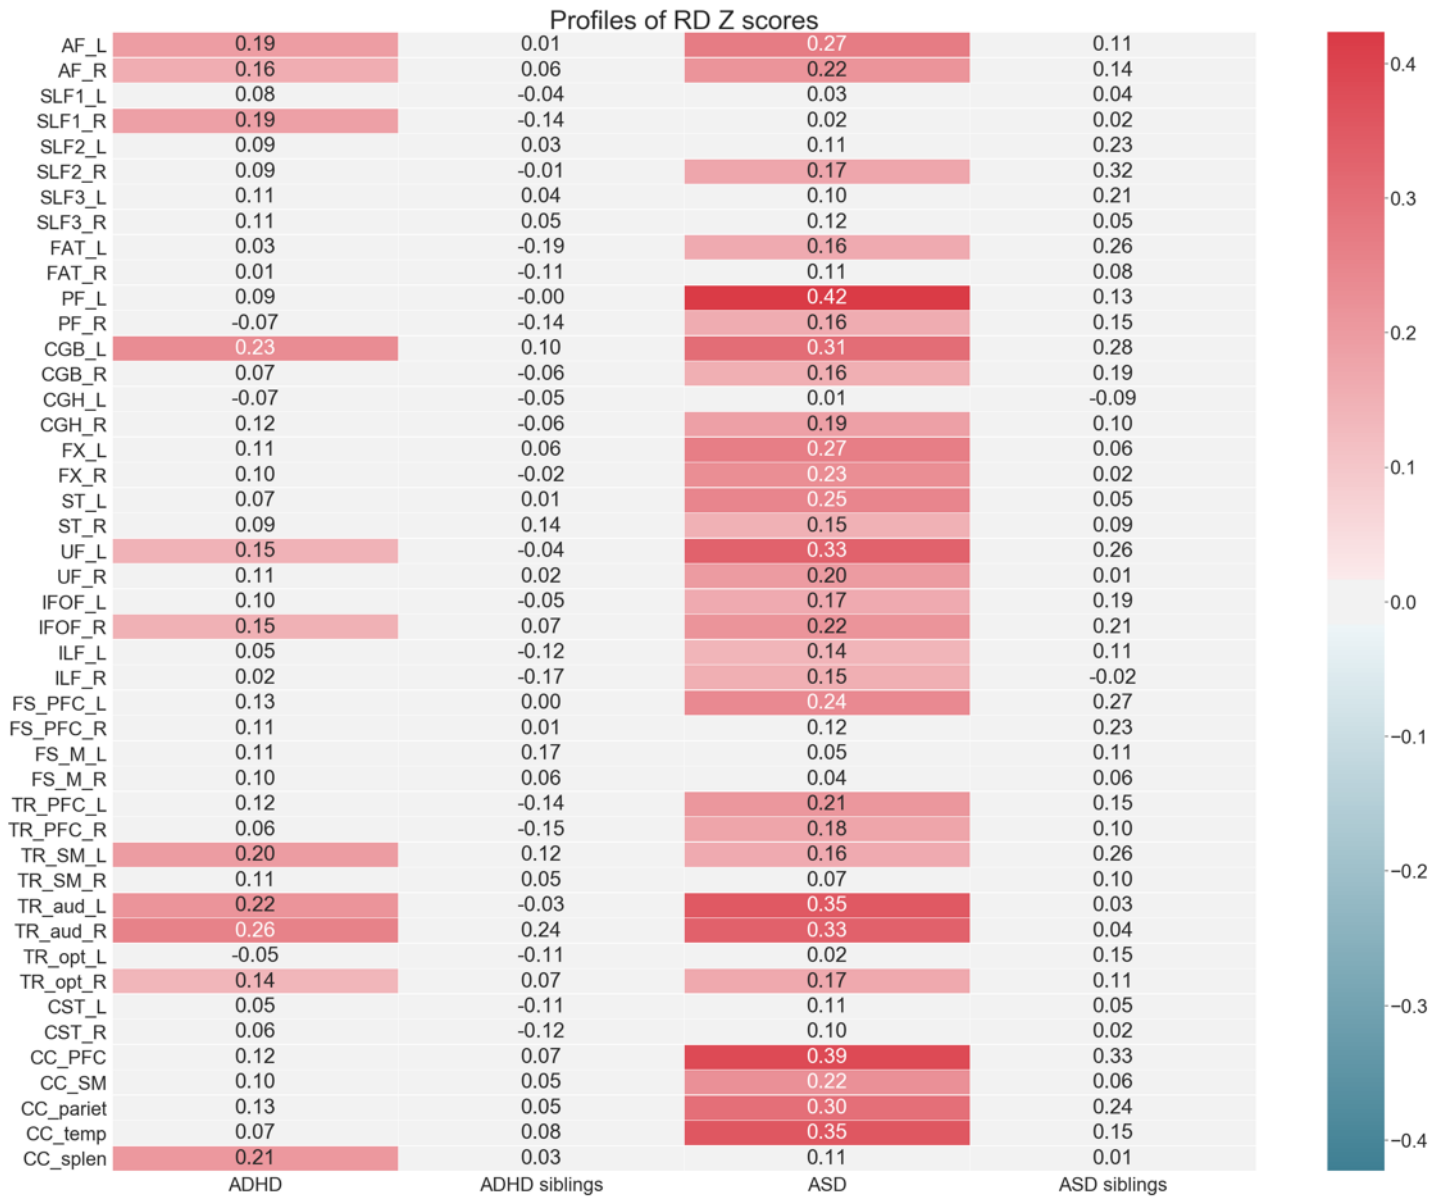

(C) AD Z-score profiles

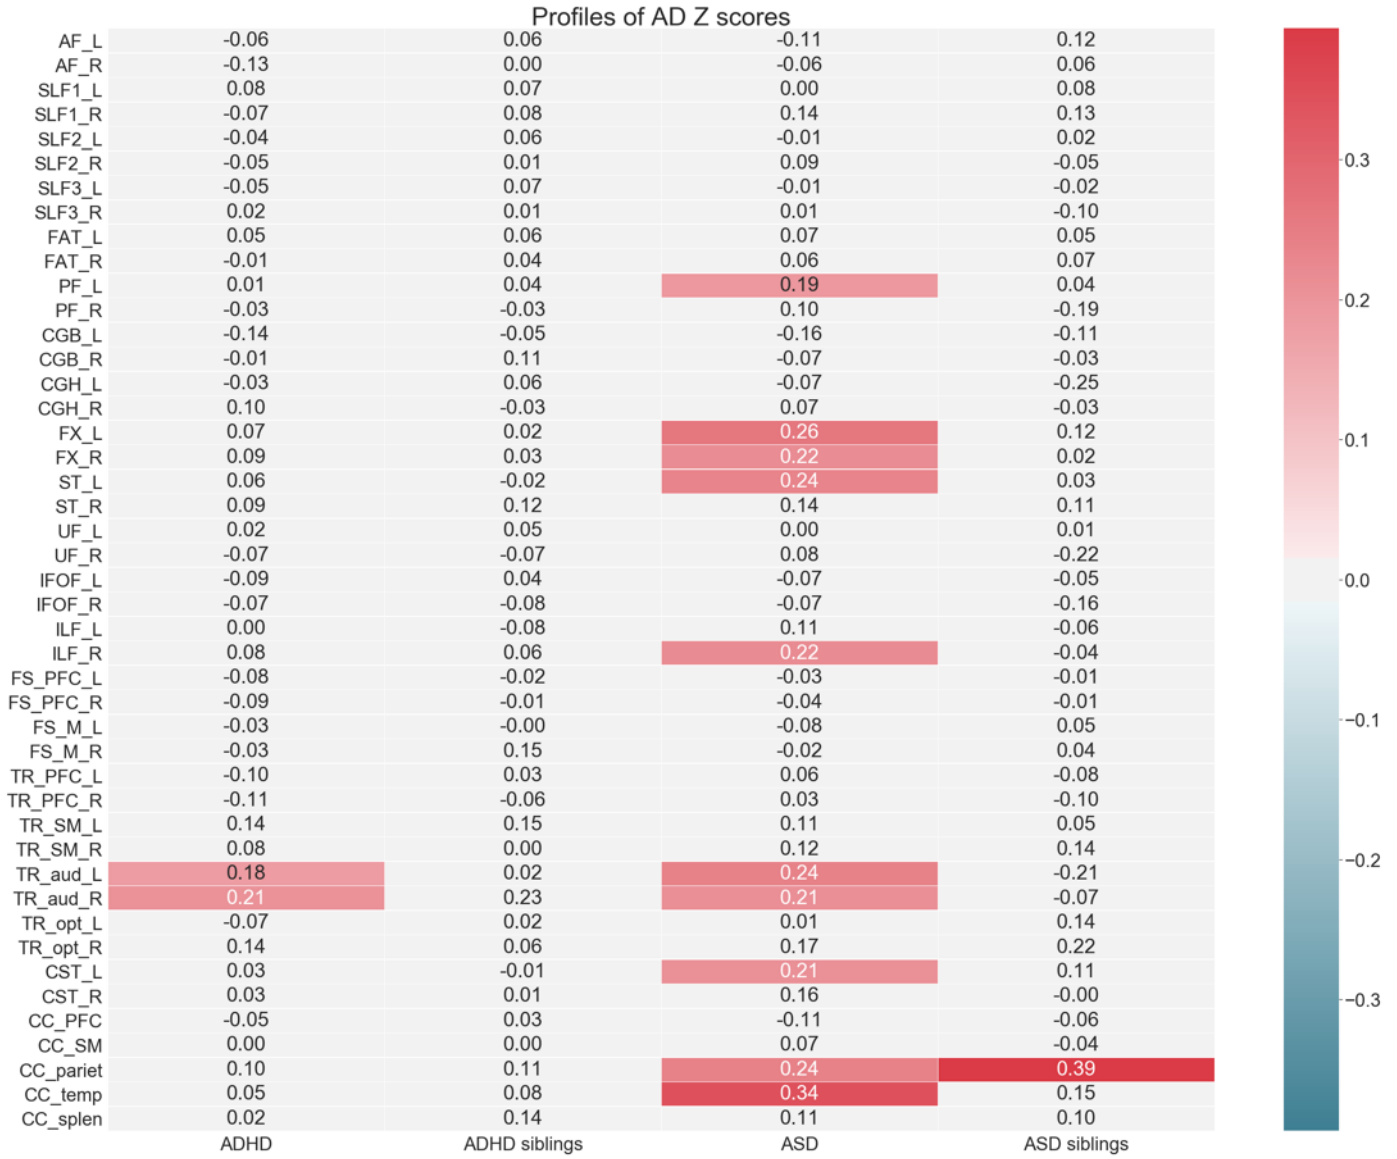

**Figure S22. Diffusion Z-score profiles of children and adults with attention-deficit/hyperactivity disorder or autism spectrum disorder.**

(A) mean diffusivity (MD). (B) radial diffusivity (RD). (C) axial diffusivity (AD). Scores that did not pass multiple testing using the Benjamini–Hochberg procedure (FDR = 0.05) were masked. The color gradient encodes the Z-score effect size; cyan indicates a negative effect size, and red indicates a positive effect size. For complete tract names, please refer to Table S1.

**(A) MD Z-score profiles**

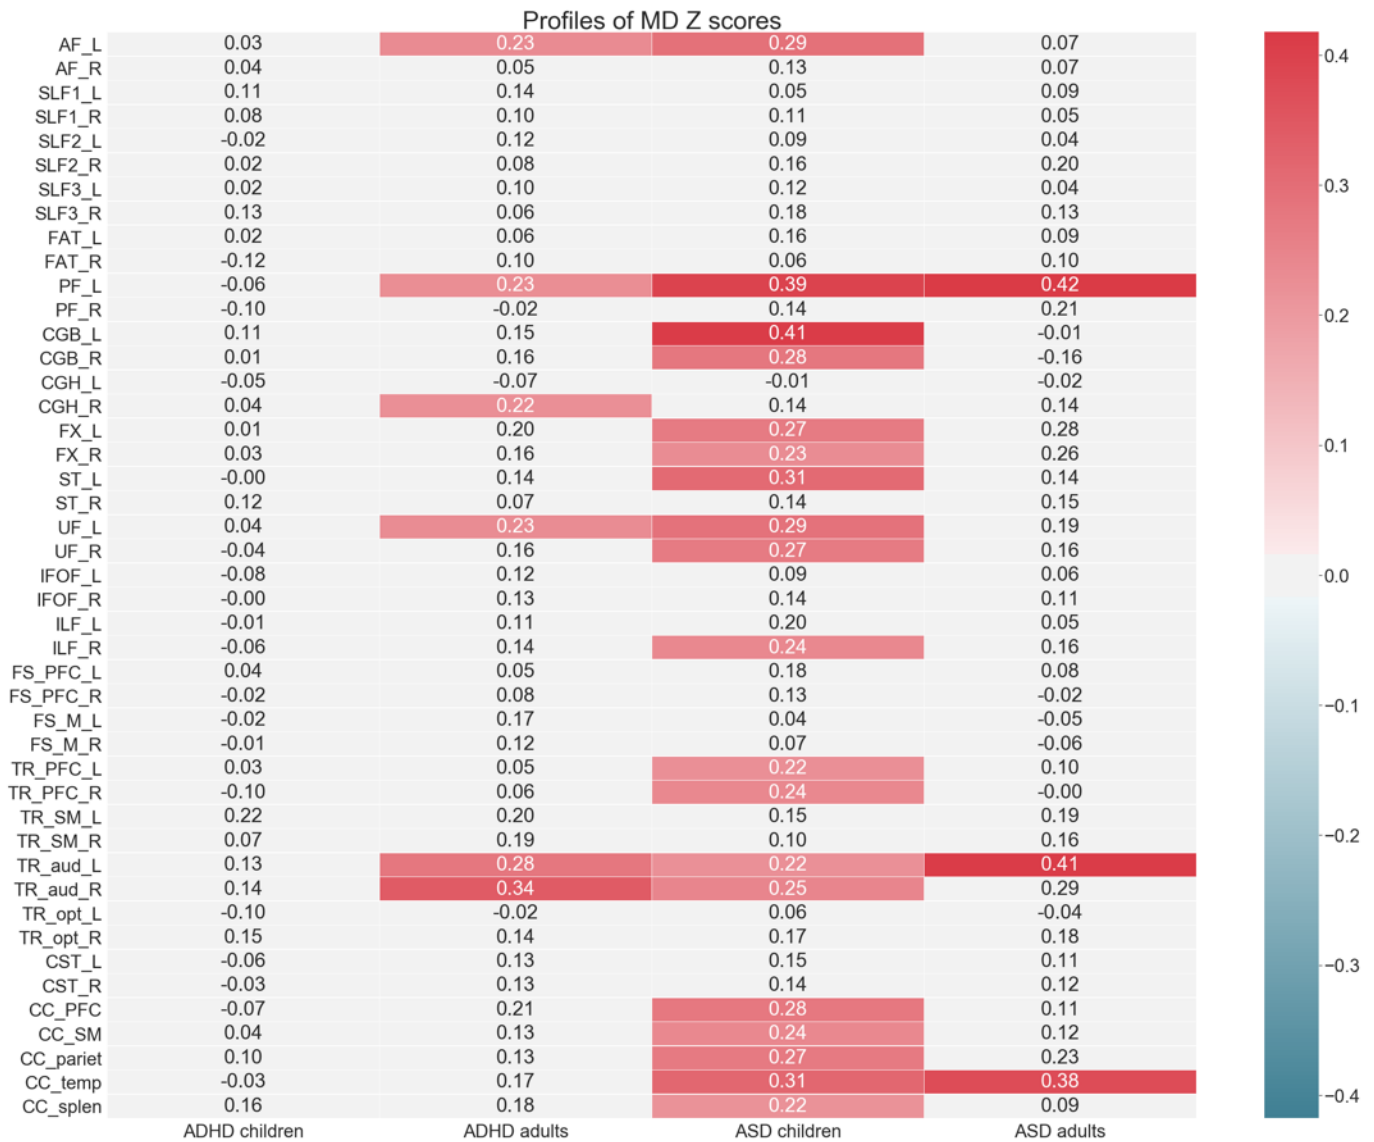

## (B) RD Z-score profiles

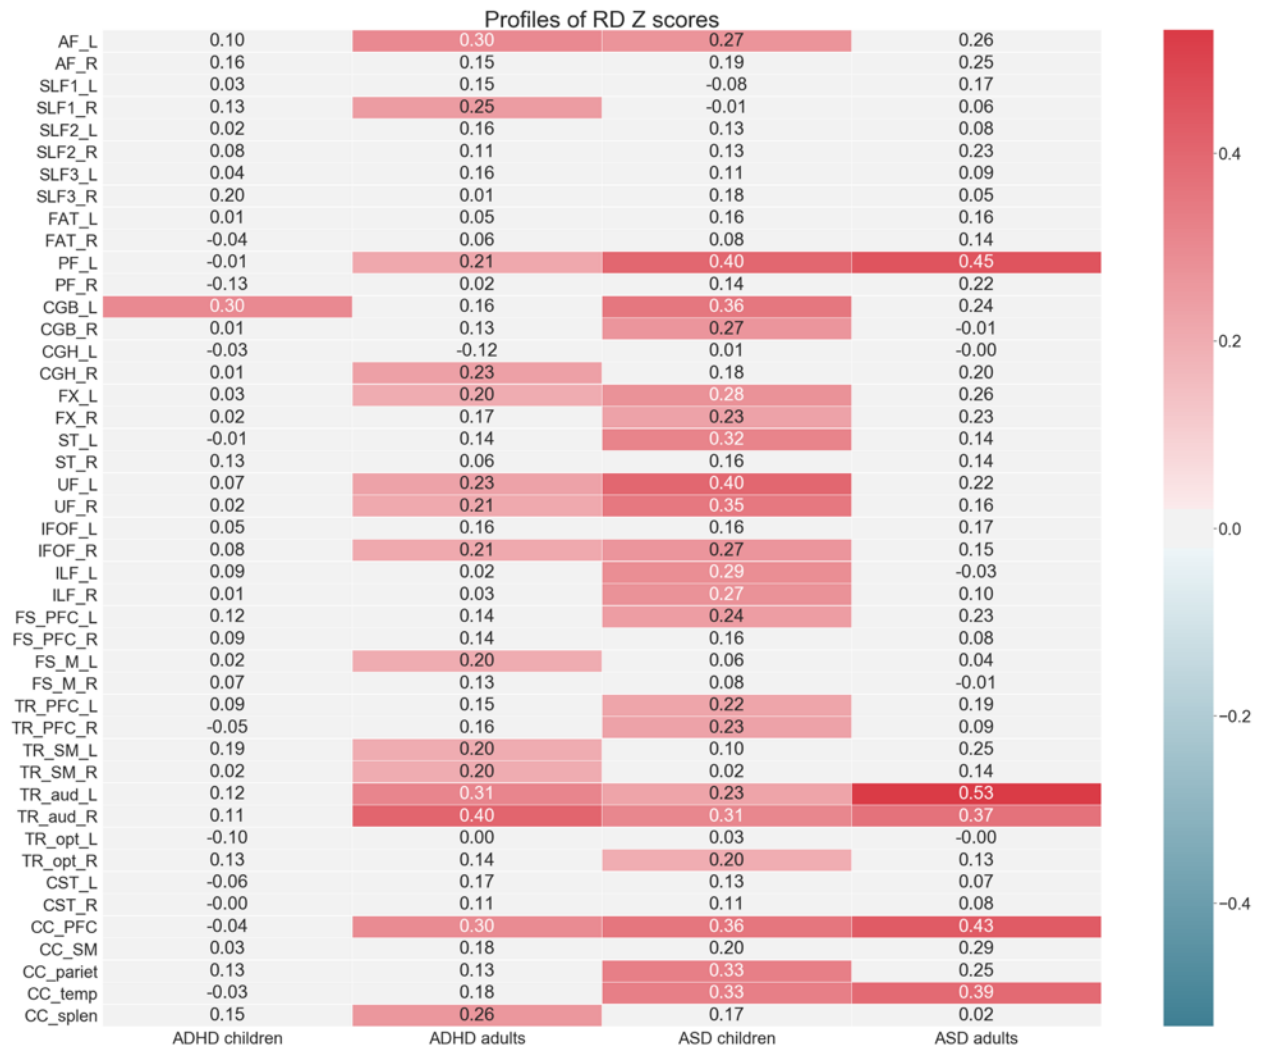

### (C) AD Z-score profiles

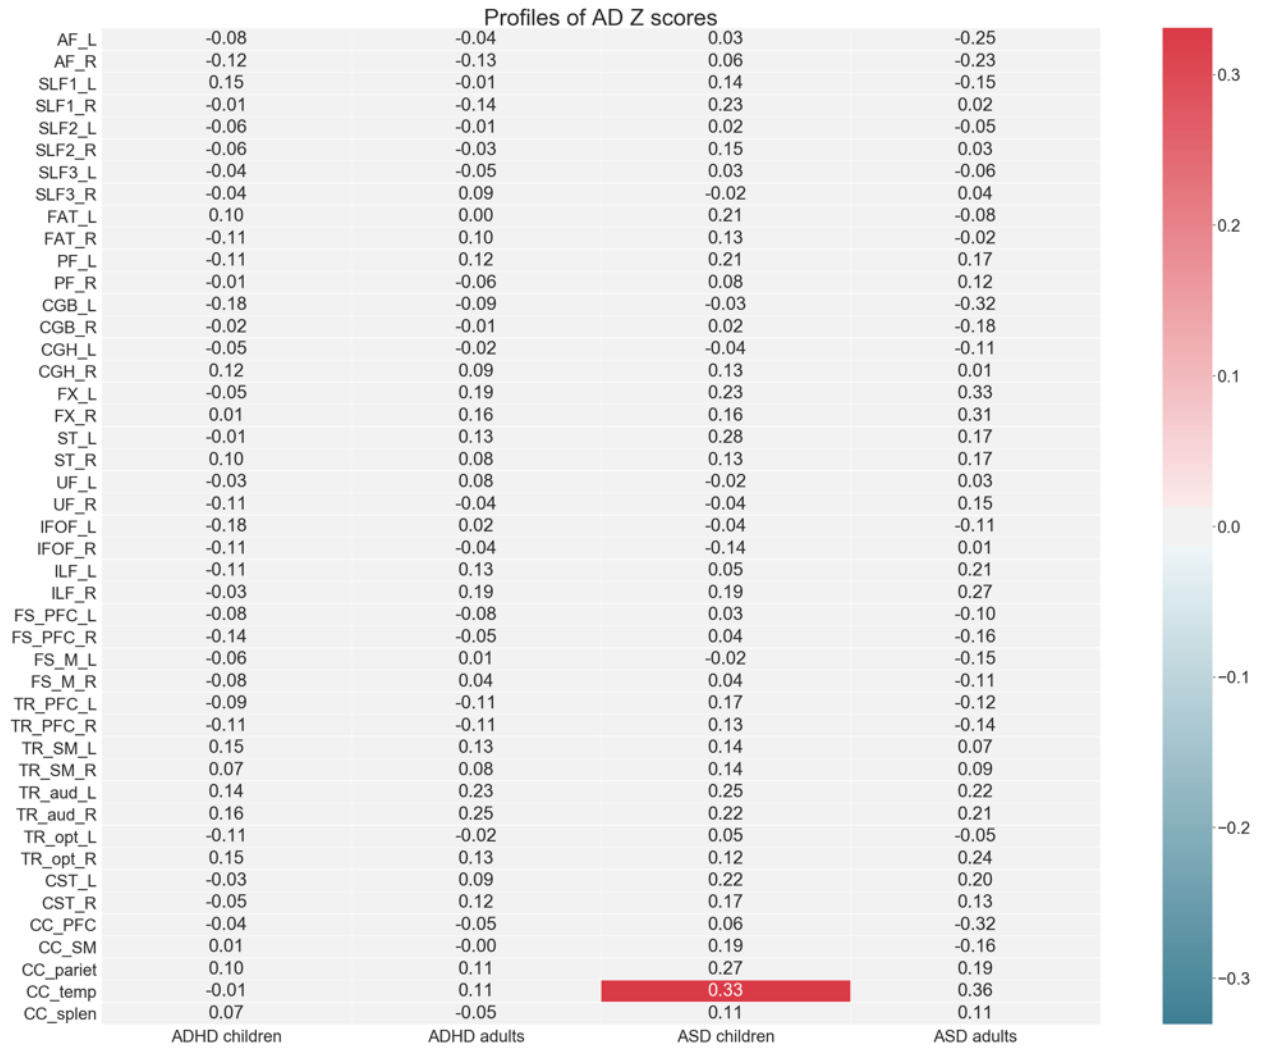



## Figure S23. Sex-specific diffusion Z-score profiles.

Scores that did not pass multiple testing using the Benjamini–Hochberg procedure (FDR = 0.05) were masked. The color gradient encodes the Z-score effect size; cyan indicates a negative effect size, and red indicates a positive effect size. For complete tract names, please refer to Table S1.

(A) MD (B) RD (C) AD

(A) MD

### A. Profiles of MD Z scores for male

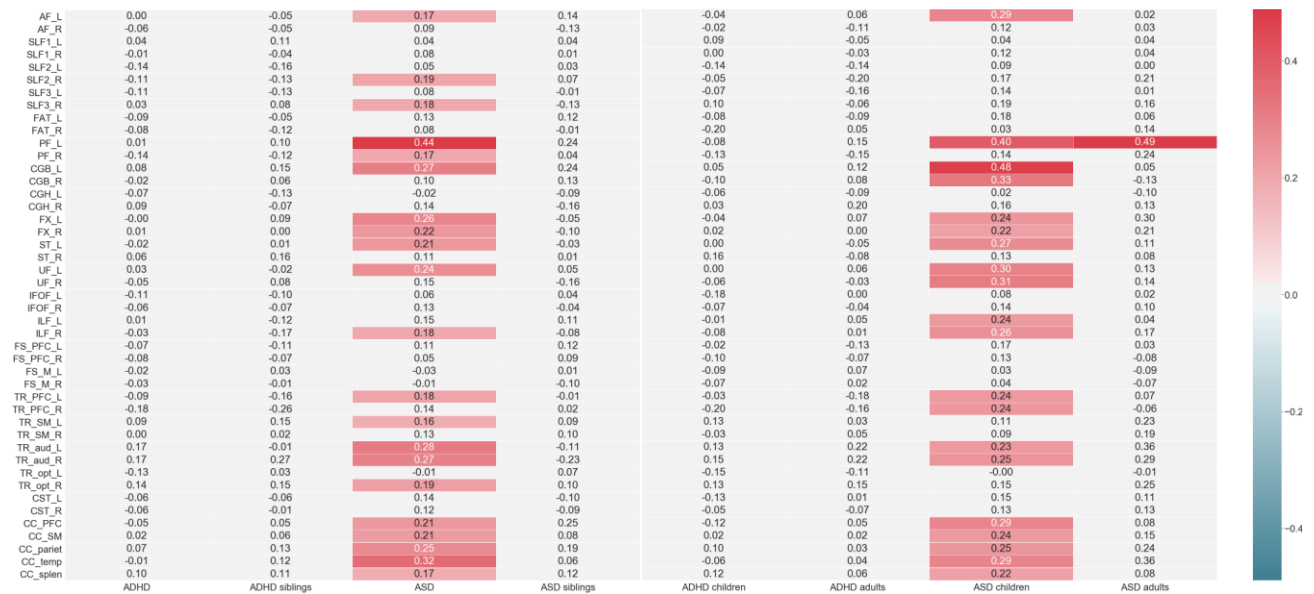

### B. Profiles of MD Z scores for female

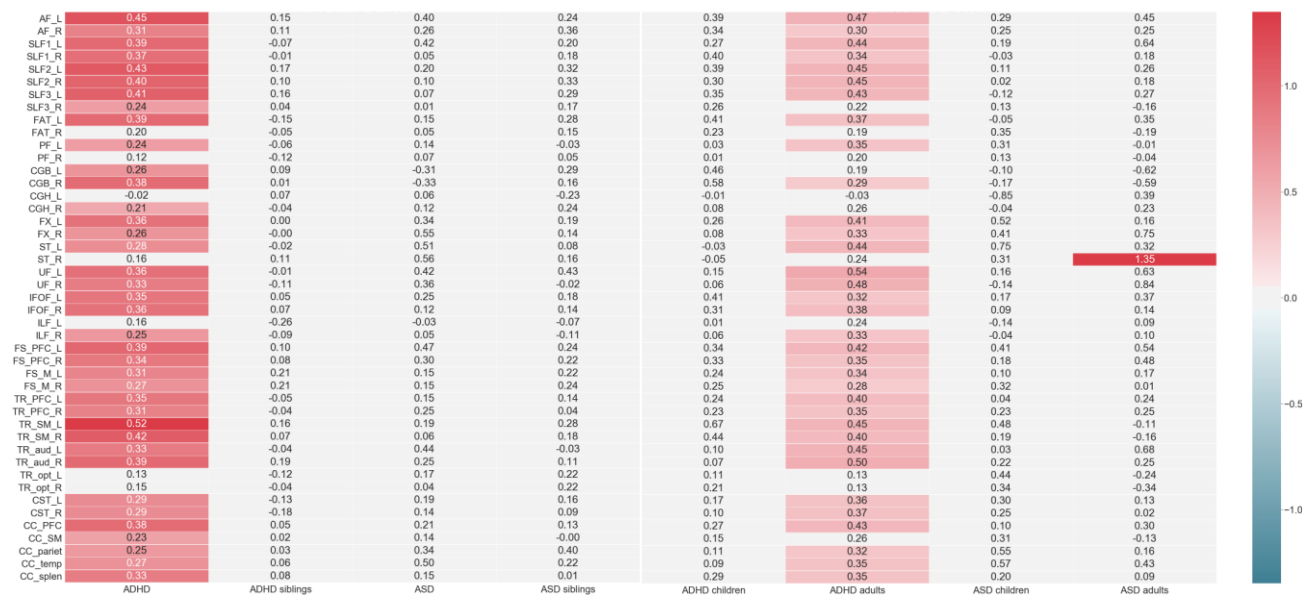

## (B) RD

### A. Profiles of RD Z scores for male

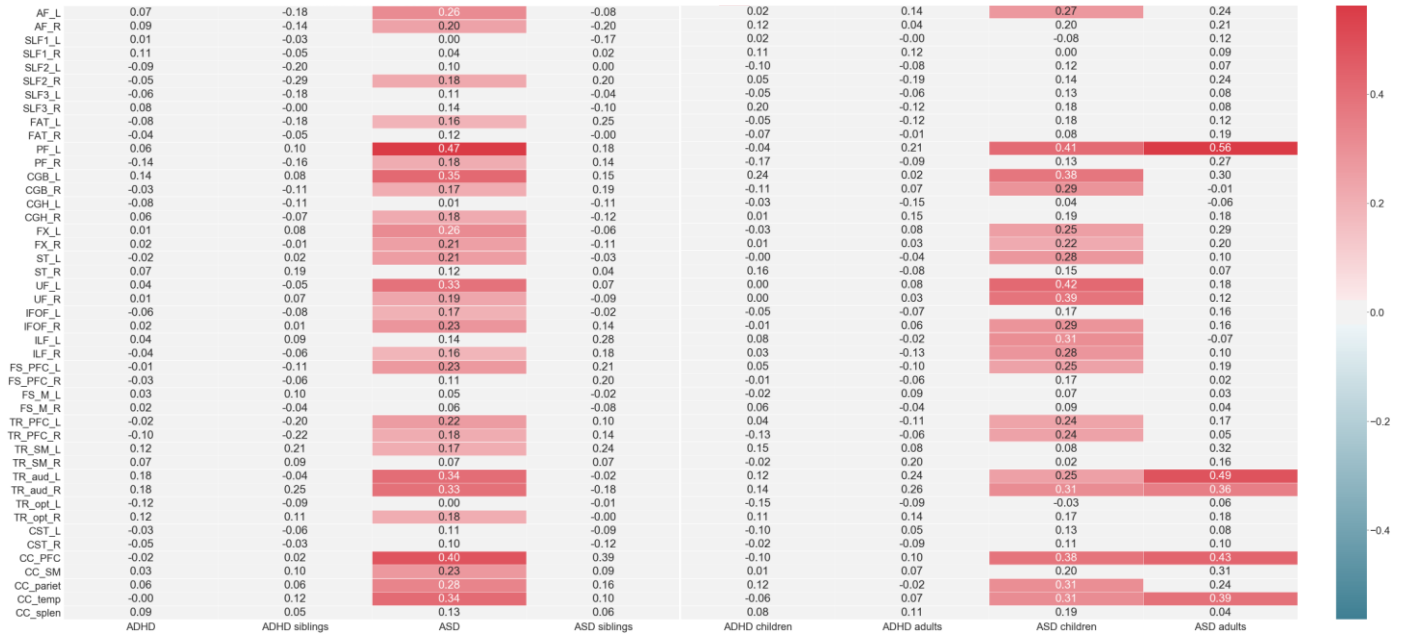

### B. Profiles of RD Z scores for female

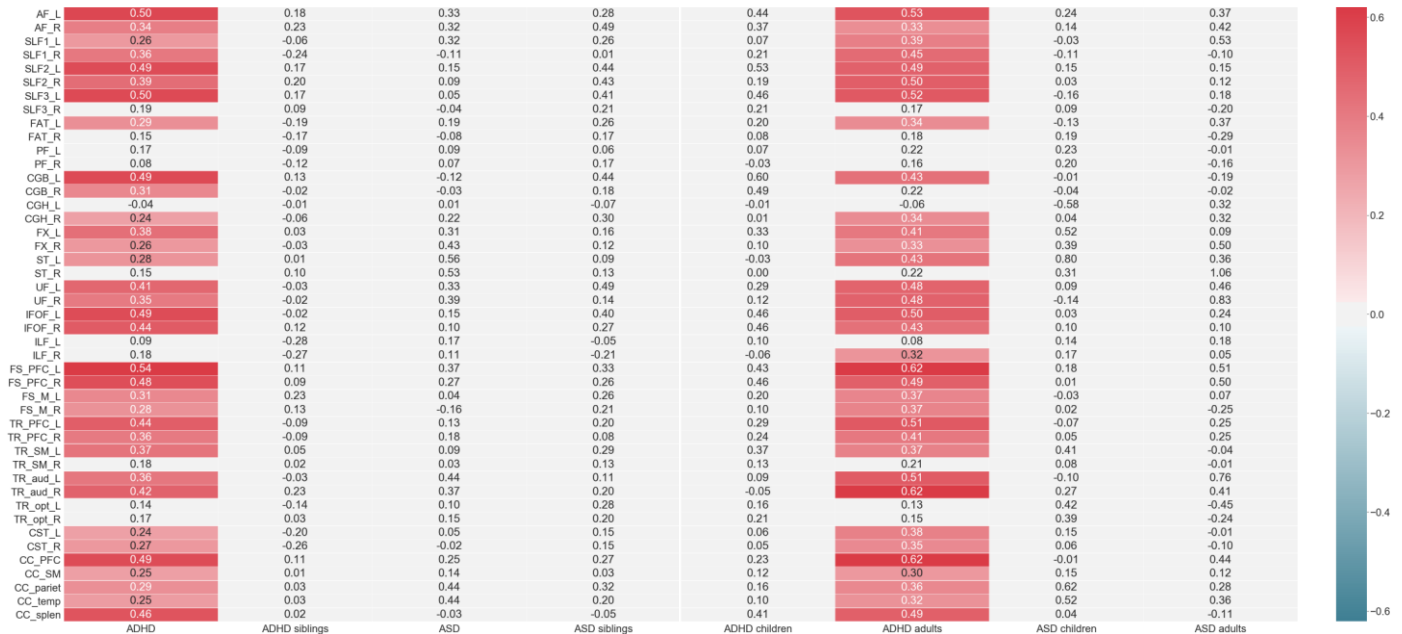

# (C) AD

## A. Profiles of AD Z scores for male

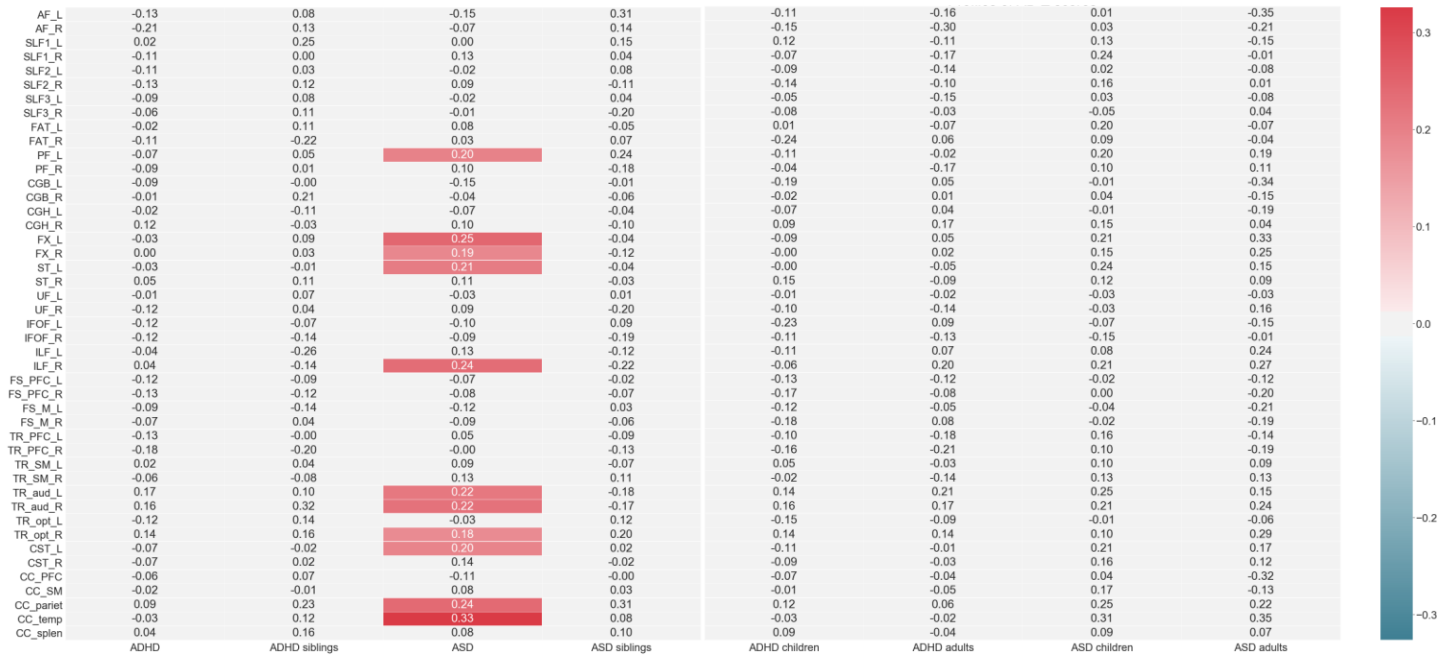

## B. Profiles of AD Z scores for female

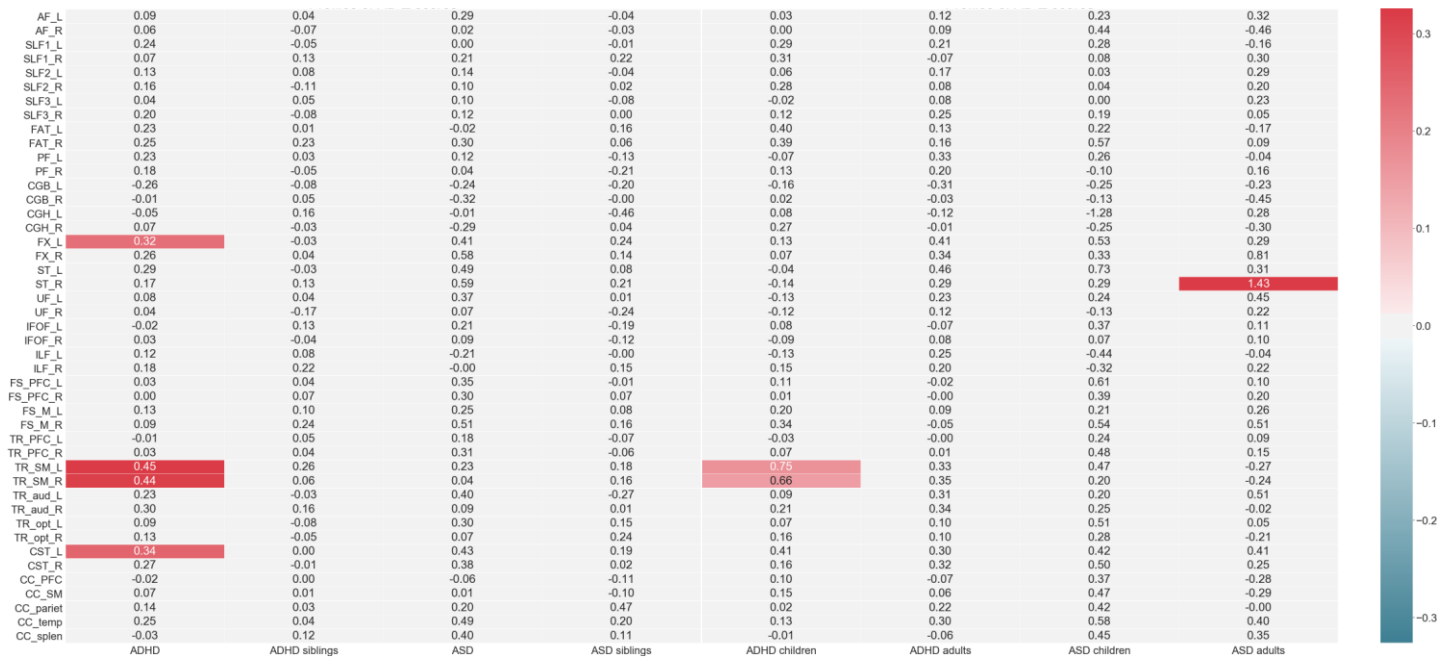

## Figure S24. Canonical correlation analysis (CCA) between diffusion Z-scores and symptom assessment

Canonical correlation analysis (CCA) between diffusion indices Z-scores and symptom assessment, including Autism Spectrum Quotient (AQ), Social Response Scale (SRS), and the Swanson, Nolan, and Pelham Teacher and Parent Rating Scale-IV (SNAP-IV). For complete white matter tract names, please refer to Table S1. The following figures show the CCA between symptom scores and (A) MD (mode 1, 2), and (B) RD (mode 1-3) (C) AD (mode 1-3) Z-scores.

### (A) MD

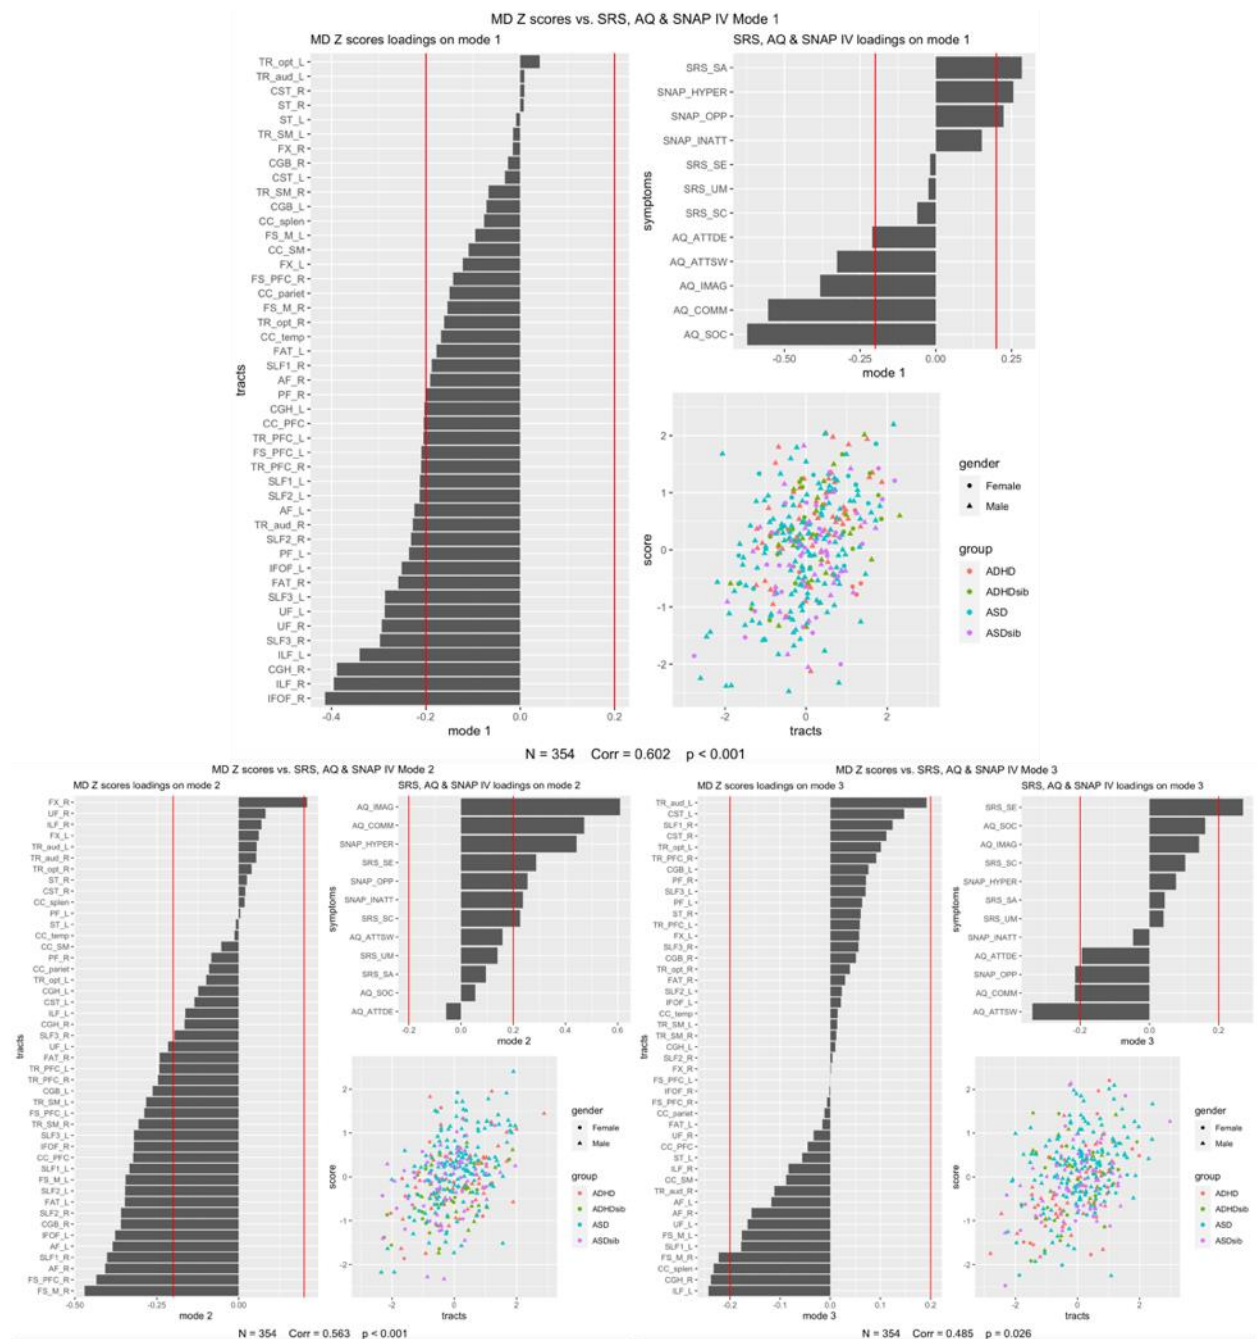

**(B) RD**

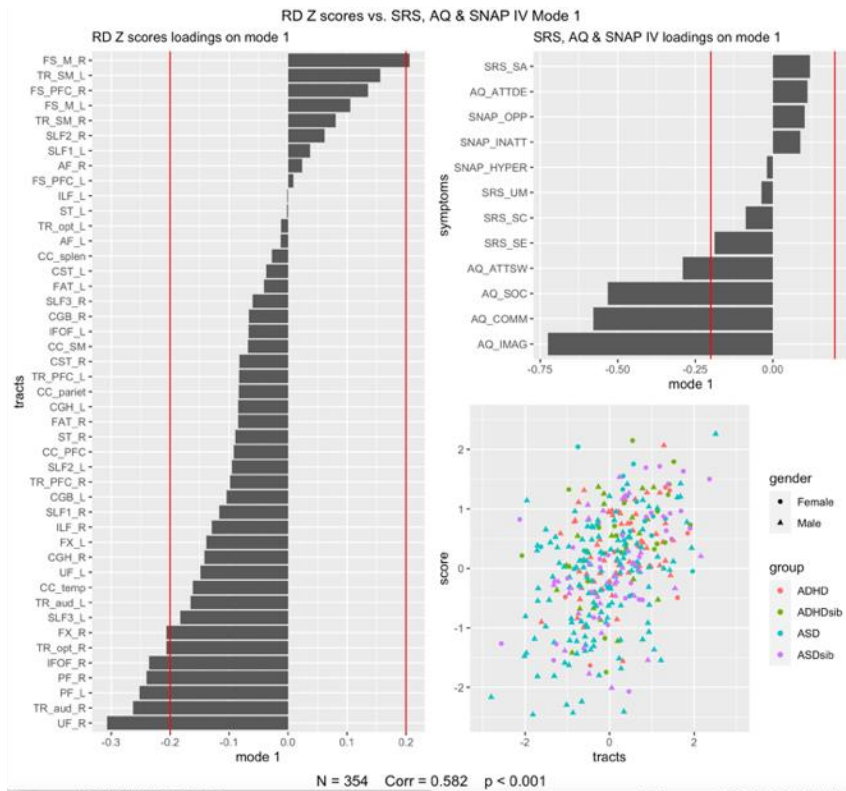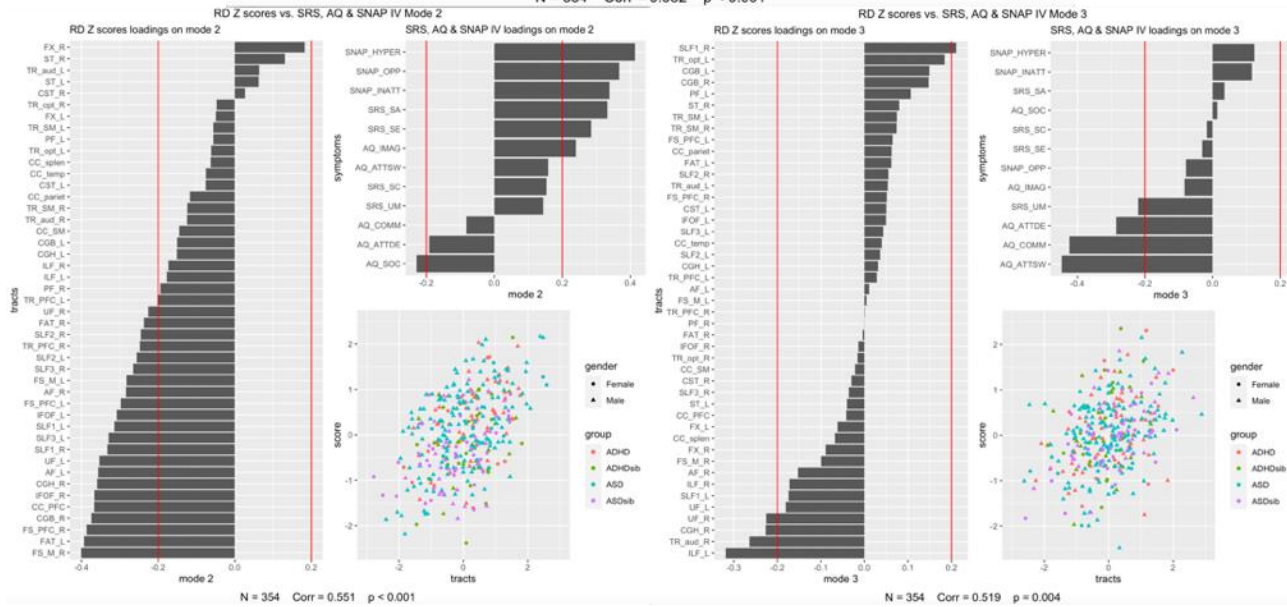

(C)AD

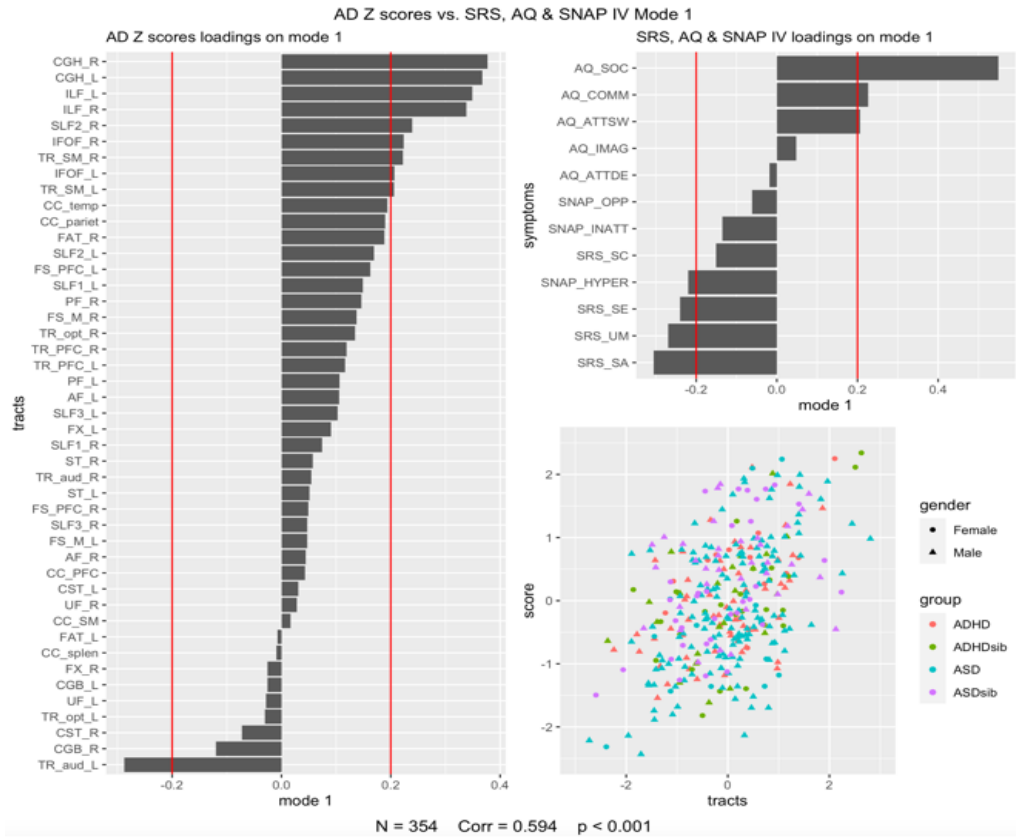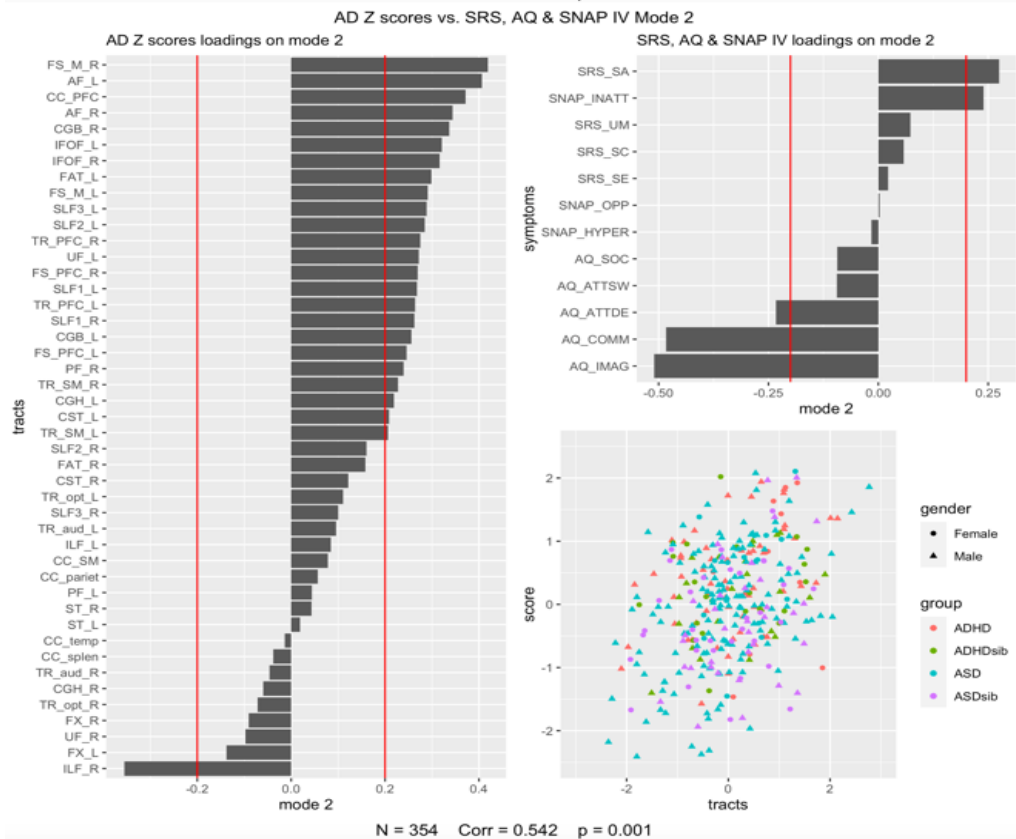



**Figure S25. Canonical correlation analysis (CCA) between diffusion indices Z-scores and neuropsychological assessment.**

Canonical correlation analysis (CCA) between diffusion indices Z-scores and neuropsychological assessment, including the Cambridge Neuropsychological Test Automated Battery (CANTAB) and Conner's continuous performance test (CCPT). Because of the orthogonality of CCA, each mode exhibited a distinct correlation with different CANTAB items and white matter tracts. For complete white matter tract names, please refer to Table S1. For a full list of CCPT and CANTAB items, please refer to Table S3 and Table S4, respectively. Here list the results of CCA between neuropsychological items and (A) MD (mode 1-3) and (B) RD (mode 1-4) (C) AD (mode 1-3) Z-scores.





**(B) RD**

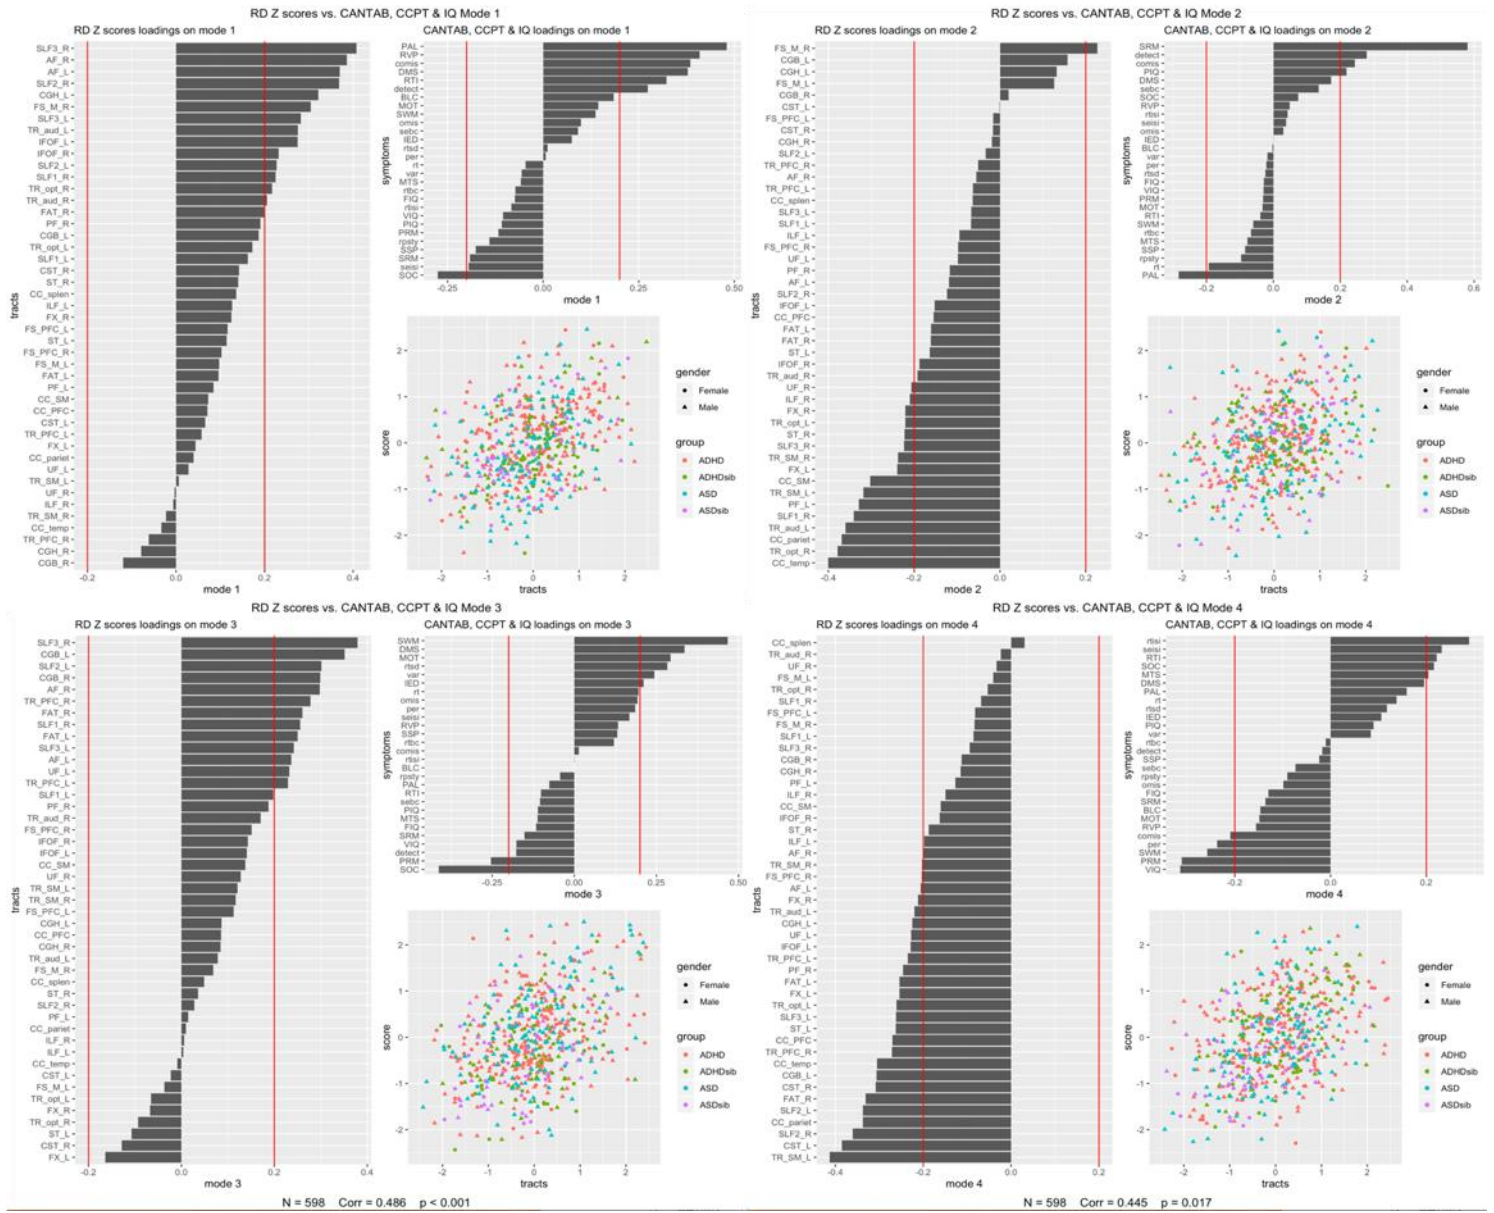

(C) AD

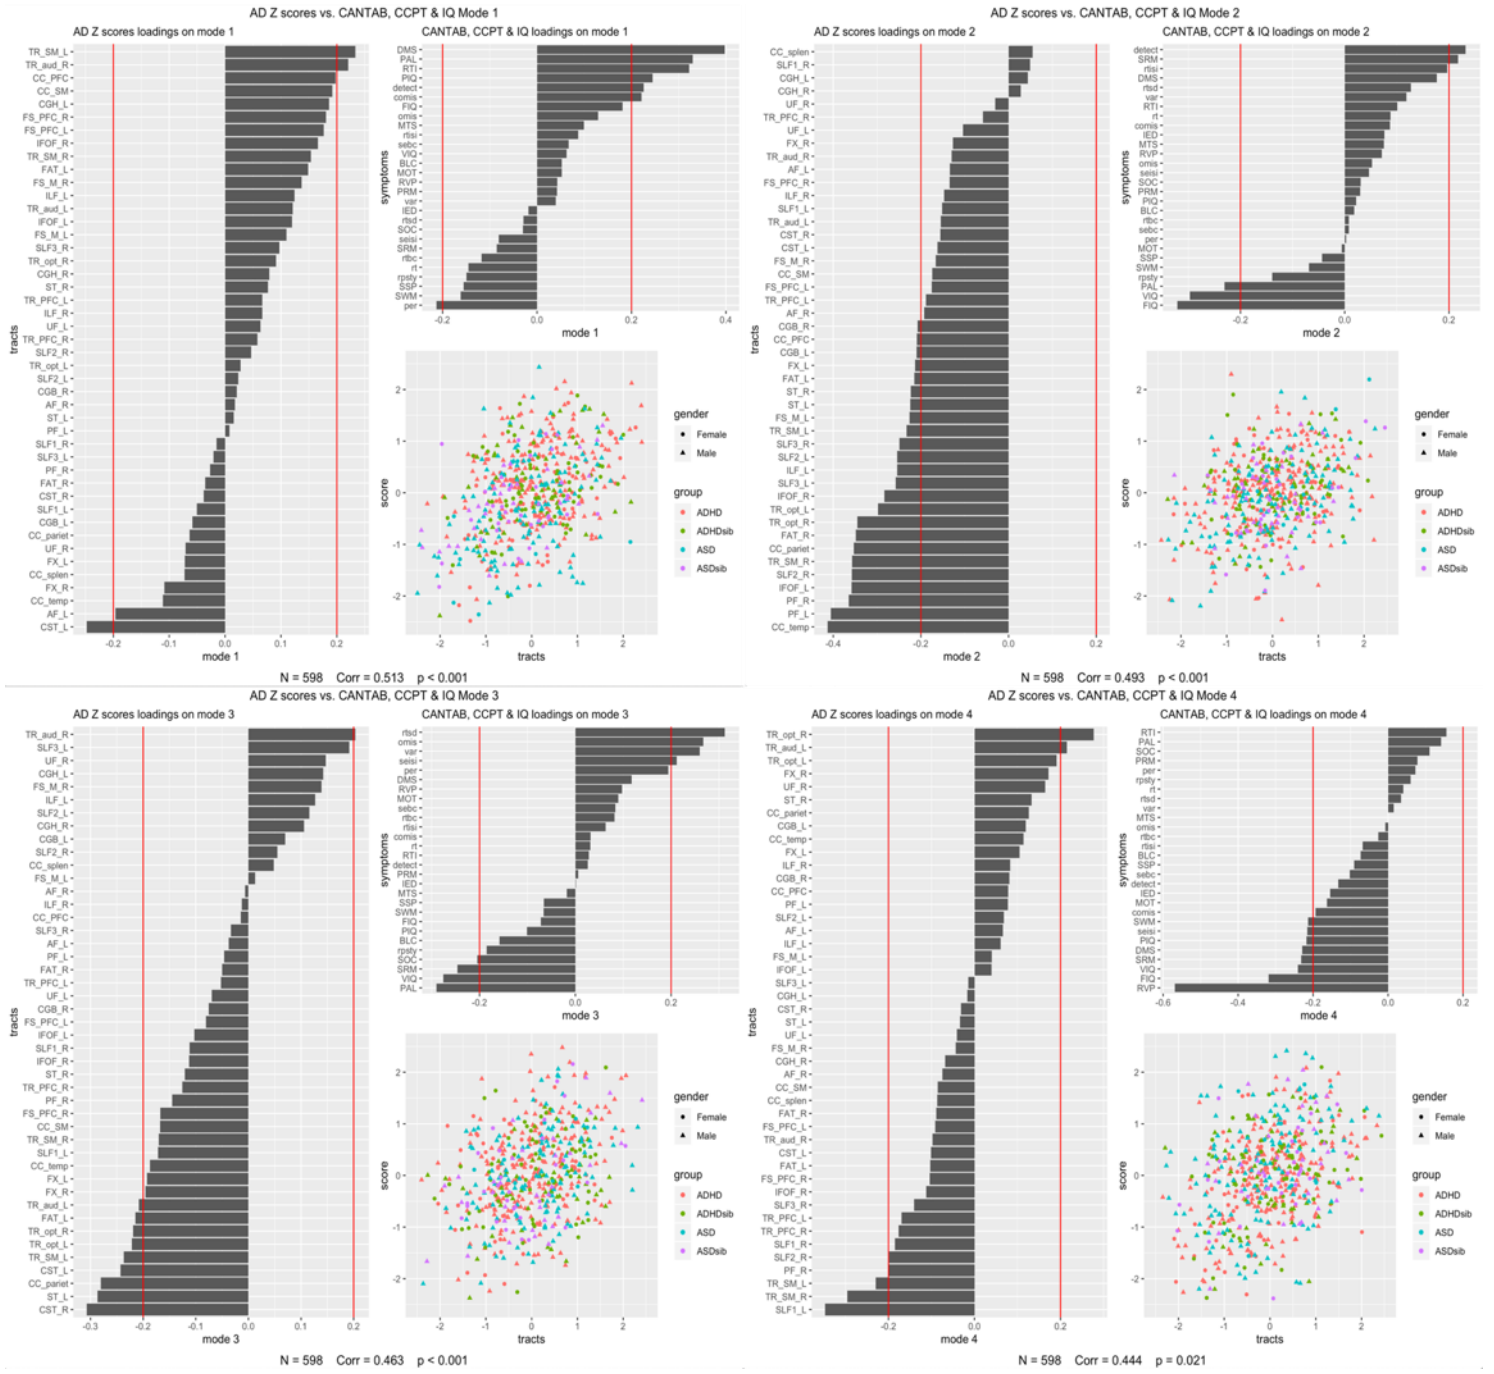

**Figure S26: Circos plots of brain-behavior relationships revealed by canonical correlation analysis (CCA).**

Potential associations between diffusion index Z-scores of white matter tracts and symptom scores. (A) CCA of MD Z-scores and symptom scores, (B) CCA of RD Z-scores and symptom scores, (C) CCA of AD Z-scores, and symptom scores. The associations were identified in significant modes of CCA results. Items with high loadings (>0.2) on the significant modes ( $p < 0.05$ ) were selected. The plots showed the underlying brain-behavior relationship beyond diagnostic boundaries.

**(A) CCA of MD Z-scores and symptom scores**

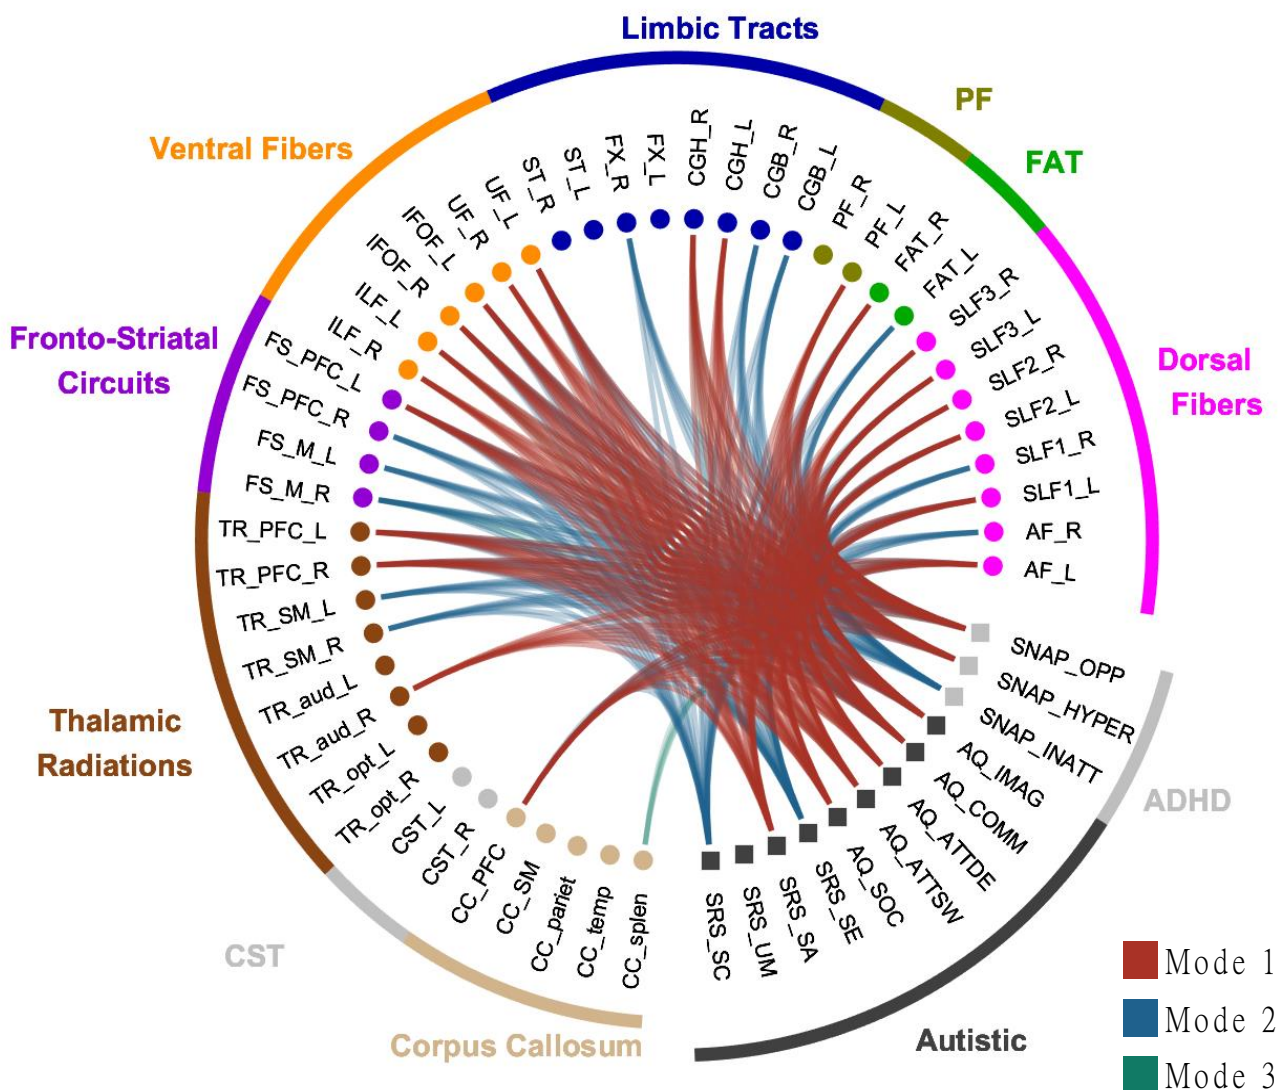





(C) CCA of AD Z-scores and symptom scores

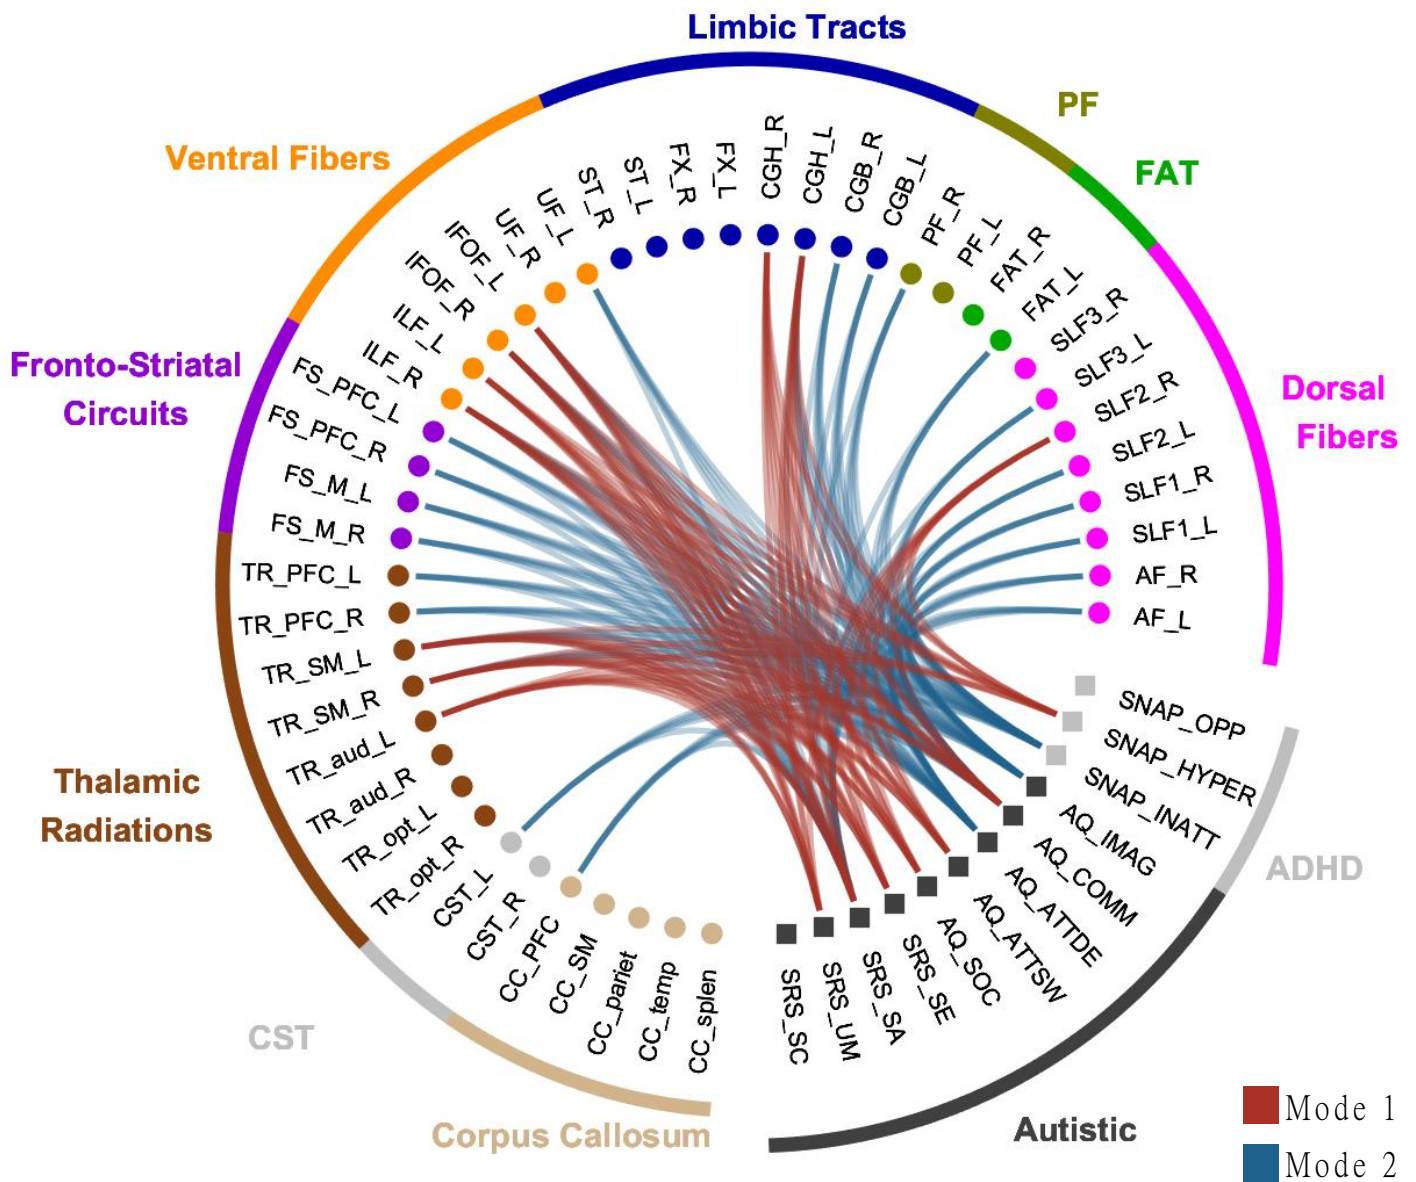

**Figure S27: Circos plots of brain-function relationships revealed by canonical correlation analysis (CCA).**

Potential associations between neuropsychological tests and diffusion index Z-scores of white matter tracts. (A) CCA of MD Z-scores and neuropsychological assessment, (B) CCA of RD Z-scores and neuropsychological assessment, (C) CCA of AD Z-scores and neuropsychological assessment.

**(A) CCA of MD Z-scores and neuropsychological assessment**

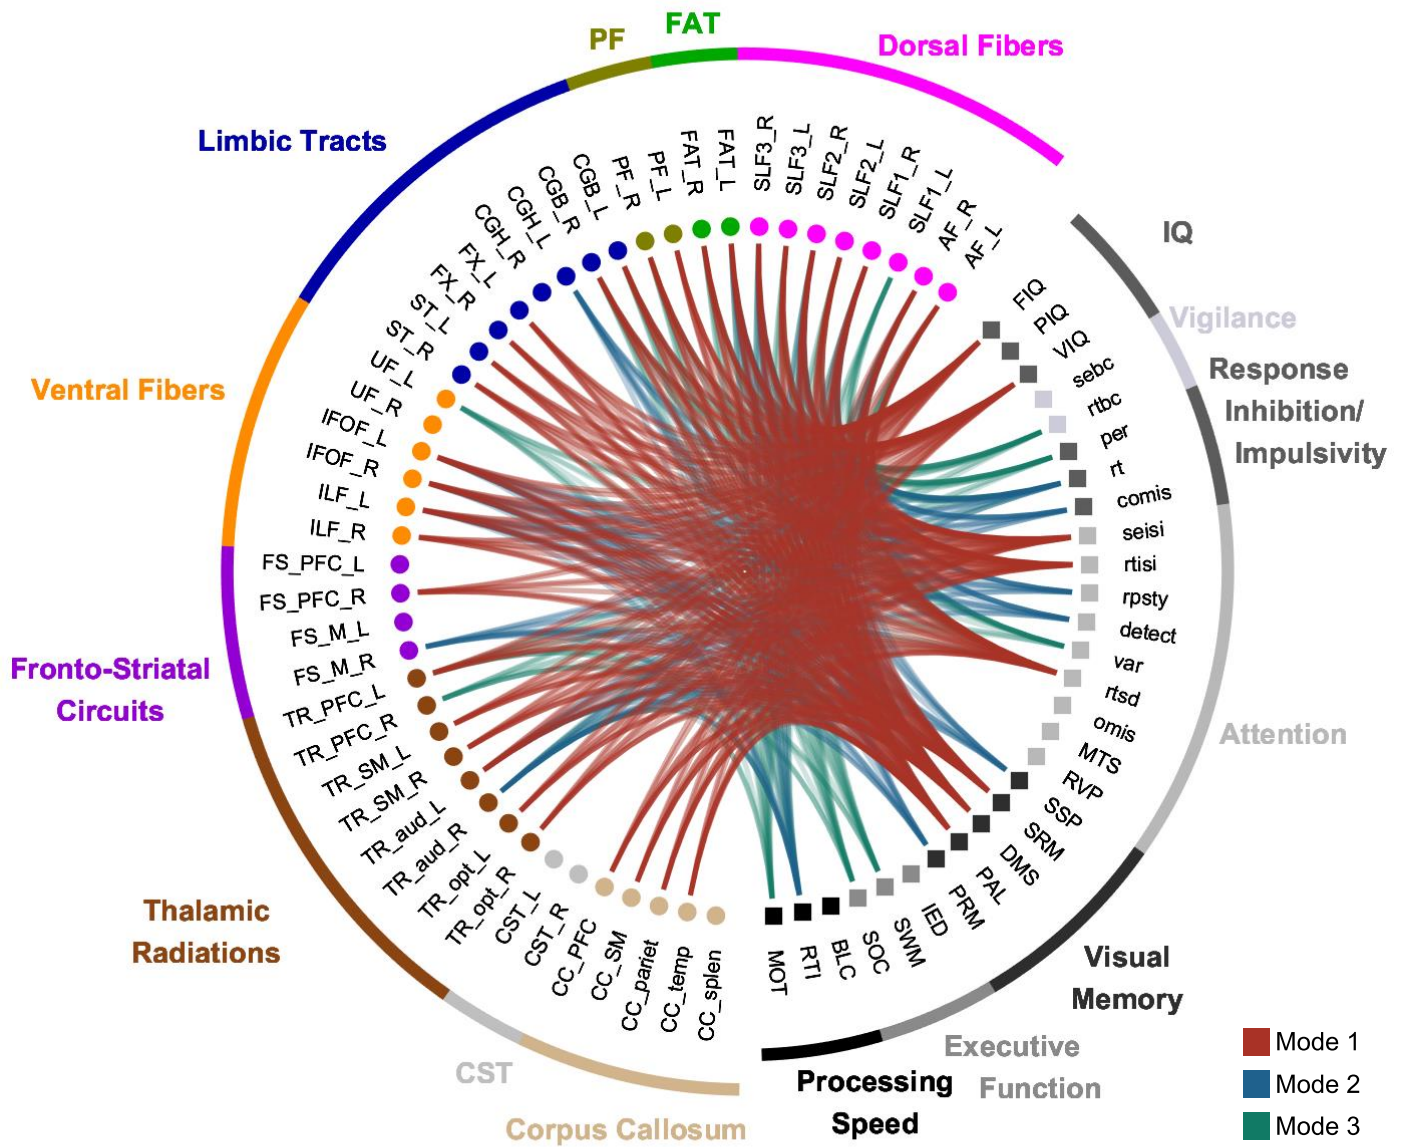



(B) CCA of RD Z-scores and neuropsychological assessment

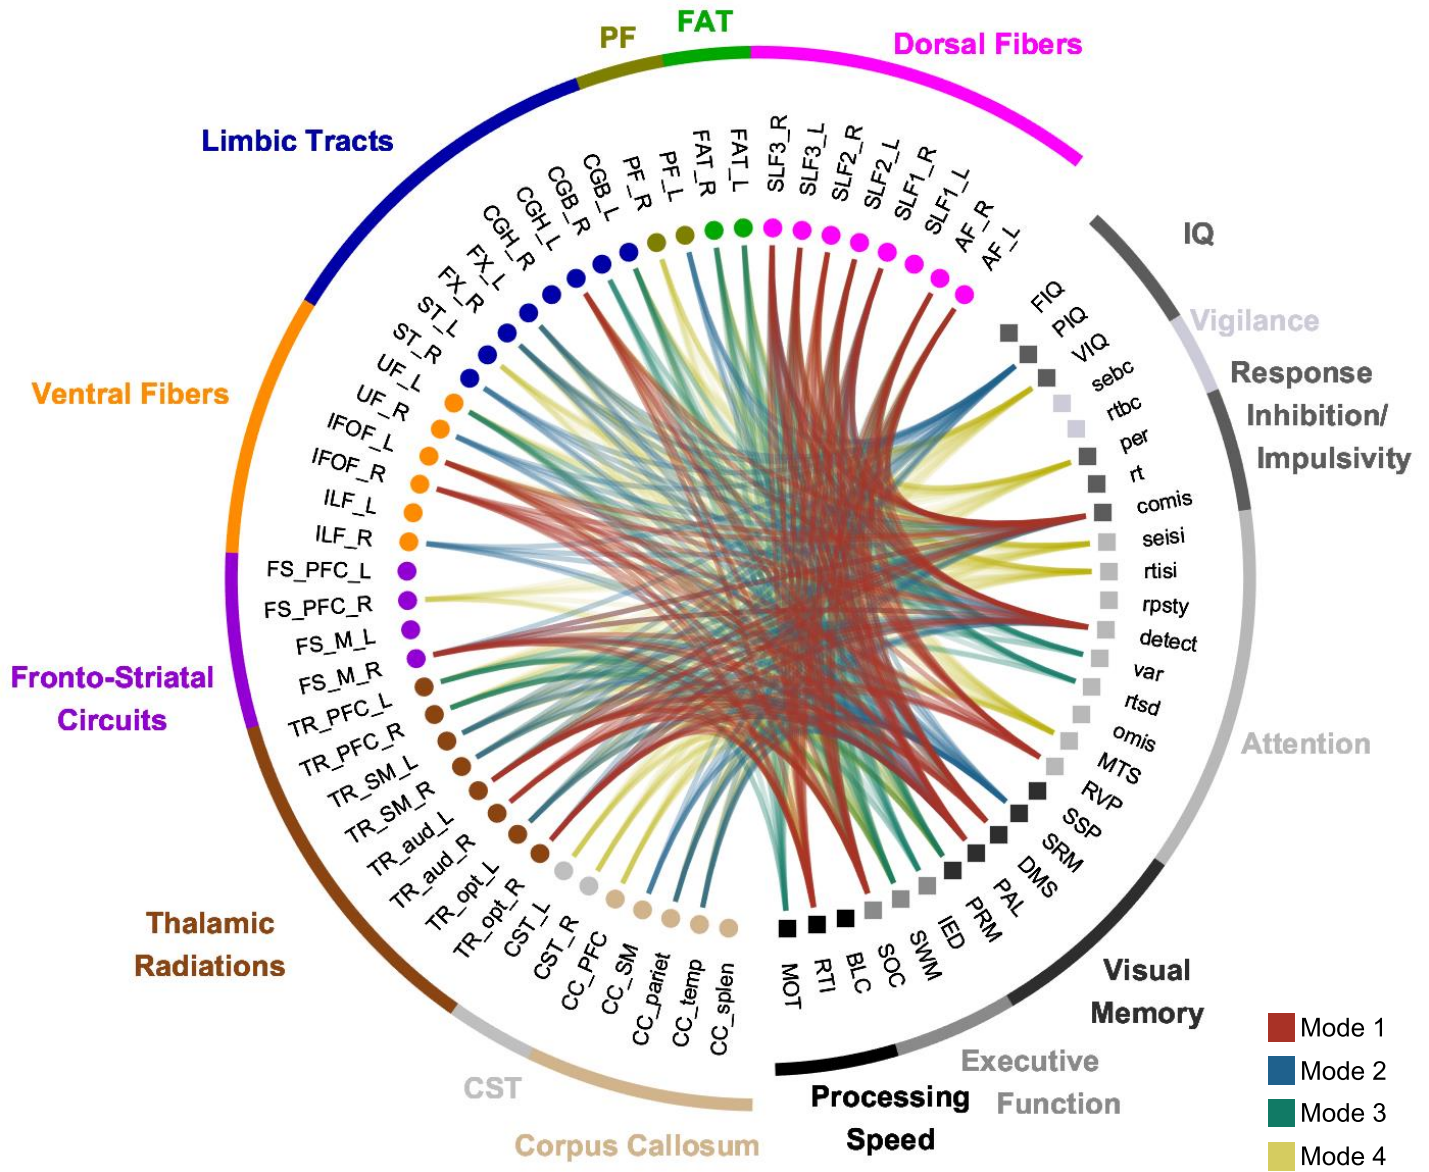

(C) CCA of AD Z-scores and neuropsychological assessment

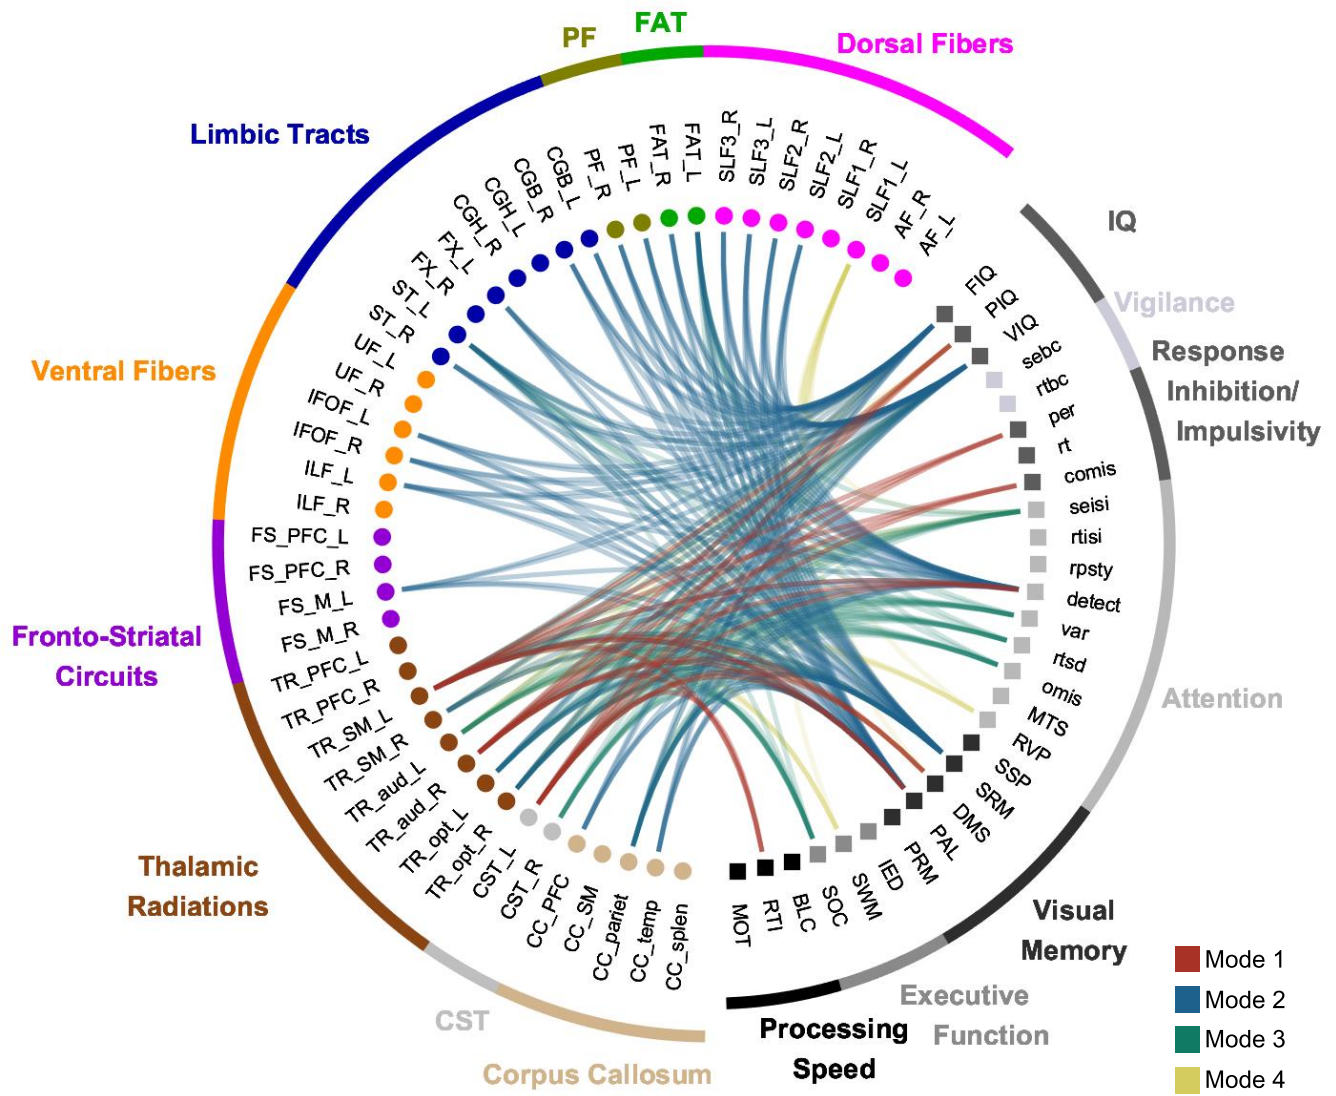



## Supplementary Results

### Result S1-1: Mean deviation effect size of people with ADHD

The effect size (ES) of mean deviation of people with ADHD, lower and upper bound of the confidence interval (CI). The t-statistics, p-value, and adjusted p-value by Benjamini correction (FDR  $q=0.05$ ), the rank of p-value, and whether the tract is significant after multiple corrections.

|          | ES    | CI_low | CI_up | t     | p      | p_adj | rank | Significance |
|----------|-------|--------|-------|-------|--------|-------|------|--------------|
| AF_L     | -0.20 | -0.32  | -0.08 | -3.40 | 0.000  | 0.009 | 2    | Yes          |
| AF_R     | -0.19 | -0.31  | -0.07 | -3.15 | 0.001  | 0.010 | 4    | Yes          |
| SLF1_L   | -0.06 | -0.18  | 0.06  | -0.97 | 0.167  | 0.209 | 36   | No           |
| SLF1_R   | -0.16 | -0.28  | -0.04 | -2.68 | 0.004  | 0.016 | 11   | Yes          |
| SLF2_L   | -0.10 | -0.22  | 0.01  | -1.72 | 0.043  | 0.072 | 27   | No           |
| SLF2_R   | -0.13 | -0.25  | -0.02 | -2.23 | 0.013  | 0.032 | 19   | Yes          |
| SLF3_L   | -0.10 | -0.21  | 0.02  | -1.60 | 0.055  | 0.085 | 29   | No           |
| SLF3_R   | -0.12 | -0.23  | 0.00  | -1.93 | 0.027  | 0.047 | 26   | Yes          |
| FAT_L    | -0.01 | -0.13  | 0.10  | -0.21 | 0.416  | 0.426 | 44   | No           |
| FAT_R    | -0.12 | -0.24  | 0.00  | -1.96 | 0.025  | 0.048 | 24   | Yes          |
| PF_L     | -0.12 | -0.24  | 0.00  | -2.03 | 0.022  | 0.043 | 23   | Yes          |
| PF_R     | 0.04  | -0.08  | 0.16  | 0.68  | 0.249  | 0.295 | 38   | No           |
| CGB_L    | -0.25 | -0.37  | -0.13 | -4.20 | <0.001 | 0.001 | 1    | Yes          |
| CGB_R    | -0.08 | -0.20  | 0.03  | -1.39 | 0.083  | 0.125 | 30   | No           |
| CGH_L    | -0.01 | -0.13  | 0.10  | -0.22 | 0.415  | 0.434 | 43   | No           |
| CGH_R    | -0.06 | -0.18  | 0.05  | -1.07 | 0.143  | 0.190 | 34   | No           |
| FX_L     | -0.14 | -0.26  | -0.02 | -2.34 | 0.010  | 0.026 | 17   | Yes          |
| FX_R     | -0.03 | -0.15  | 0.09  | -0.47 | 0.319  | 0.368 | 39   | No           |
| ST_L     | -0.01 | -0.13  | 0.11  | -0.15 | 0.440  | 0.440 | 45   | No           |
| ST_R     | -0.02 | -0.13  | 0.10  | -0.27 | 0.394  | 0.422 | 42   | No           |
| UF_L     | -0.12 | -0.24  | 0.00  | -2.04 | 0.021  | 0.044 | 22   | Yes          |
| UF_R     | -0.13 | -0.25  | -0.01 | -2.16 | 0.016  | 0.034 | 21   | Yes          |
| IFOF_L   | -0.16 | -0.27  | -0.04 | -2.62 | 0.005  | 0.018 | 12   | Yes          |
| IFOF_R   | -0.18 | -0.29  | -0.06 | -2.92 | 0.002  | 0.017 | 5    | Yes          |
| ILF_L    | -0.02 | -0.14  | 0.10  | -0.32 | 0.375  | 0.411 | 41   | No           |
| ILF_R    | 0.07  | -0.05  | 0.18  | 1.10  | 0.136  | 0.185 | 33   | No           |
| FS_PFC_L | -0.15 | -0.27  | -0.04 | -2.56 | 0.006  | 0.019 | 13   | Yes          |

|                  |       |       |       |       |       |       |    |     |
|------------------|-------|-------|-------|-------|-------|-------|----|-----|
| <b>FS_PFC_R</b>  | -0.16 | -0.28 | -0.05 | -2.75 | 0.003 | 0.016 | 9  | Yes |
| <b>FS_M_L</b>    | -0.12 | -0.23 | 0.00  | -1.95 | 0.026 | 0.047 | 25 | Yes |
| <b>FS_M_R</b>    | -0.15 | -0.26 | -0.03 | -2.45 | 0.007 | 0.022 | 15 | Yes |
| <b>TR_PFC_L</b>  | -0.15 | -0.27 | -0.03 | -2.50 | 0.006 | 0.021 | 14 | Yes |
| <b>TR_PFC_R</b>  | -0.13 | -0.25 | -0.01 | -2.19 | 0.015 | 0.033 | 20 | Yes |
| <b>TR_SM_L</b>   | -0.13 | -0.25 | -0.02 | -2.25 | 0.013 | 0.032 | 18 | Yes |
| <b>TR_SM_R</b>   | -0.07 | -0.19 | 0.05  | -1.21 | 0.114 | 0.160 | 32 | No  |
| <b>TR_aud_L</b>  | -0.16 | -0.28 | -0.05 | -2.73 | 0.003 | 0.015 | 10 | Yes |
| <b>TR_aud_R</b>  | -0.19 | -0.31 | -0.07 | -3.22 | 0.001 | 0.011 | 3  | Yes |
| <b>TR_opt_L</b>  | -0.05 | -0.17 | 0.07  | -0.87 | 0.192 | 0.233 | 37 | No  |
| <b>TR_opt_R</b>  | -0.02 | -0.14 | 0.10  | -0.36 | 0.359 | 0.404 | 40 | No  |
| <b>CST_L</b>     | -0.10 | -0.22 | 0.02  | -1.67 | 0.048 | 0.078 | 28 | No  |
| <b>CST_R</b>     | -0.07 | -0.19 | 0.04  | -1.24 | 0.108 | 0.157 | 31 | No  |
| <b>CC_PFC</b>    | -0.17 | -0.29 | -0.06 | -2.91 | 0.002 | 0.015 | 6  | Yes |
| <b>CC_SM</b>     | -0.14 | -0.26 | -0.02 | -2.38 | 0.009 | 0.025 | 16 | Yes |
| <b>CC_pariet</b> | -0.06 | -0.18 | 0.06  | -1.04 | 0.151 | 0.194 | 35 | No  |
| <b>CC_temp</b>   | -0.17 | -0.29 | -0.05 | -2.88 | 0.002 | 0.014 | 7  | Yes |
| <b>CC_splen</b>  | -0.17 | -0.29 | -0.05 | -2.84 | 0.002 | 0.014 | 8  | Yes |

## Result S1-2: Mean deviation effect size of people with ASD

The effect size (ES) of the mean deviation of people with ASD, lower and upper bound of the confidence interval (CI). The t-statistics, p-value, and adjusted p-value by Benjamini correction (FDR  $q=0.05$ ), the rank of the p-value, and whether the tract is significant after multiple corrections.

|          | ES    | CI_low | CI_up | t     | p      | p_adj  | rank | Significance |
|----------|-------|--------|-------|-------|--------|--------|------|--------------|
| AF_L     | -0.33 | -0.49  | -0.18 | -4.43 | <0.001 | <0.001 | 3    | Yes          |
| AF_R     | -0.23 | -0.38  | -0.08 | -3.02 | 0.001  | 0.005  | 12   | Yes          |
| SLF1_L   | -0.03 | -0.18  | 0.12  | -0.38 | 0.352  | 0.396  | 40   | No           |
| SLF1_R   | -0.01 | -0.16  | 0.14  | -0.10 | 0.460  | 0.460  | 45   | No           |
| SLF2_L   | -0.22 | -0.37  | -0.07 | -2.85 | 0.002  | 0.007  | 15   | Yes          |
| SLF2_R   | -0.22 | -0.37  | -0.07 | -2.94 | 0.002  | 0.006  | 13   | Yes          |
| SLF3_L   | -0.19 | -0.34  | -0.04 | -2.47 | 0.007  | 0.016  | 20   | Yes          |
| SLF3_R   | -0.25 | -0.40  | -0.09 | -3.25 | 0.001  | 0.004  | 9    | Yes          |
| FAT_L    | -0.26 | -0.41  | -0.11 | -3.44 | <0.001 | 0.003  | 5    | Yes          |
| FAT_R    | -0.16 | -0.31  | -0.01 | -2.11 | 0.018  | 0.033  | 25   | Yes          |
| PF_L     | -0.26 | -0.41  | -0.10 | -3.38 | <0.001 | 0.003  | 7    | Yes          |
| PF_R     | -0.04 | -0.19  | 0.10  | -0.58 | 0.283  | 0.344  | 37   | No           |
| CGB_L    | -0.35 | -0.50  | -0.20 | -4.61 | <0.001 | <0.001 | 2    | Yes          |
| CGB_R    | -0.17 | -0.32  | -0.02 | -2.20 | 0.014  | 0.028  | 23   | Yes          |
| CGH_L    | -0.09 | -0.24  | 0.06  | -1.20 | 0.116  | 0.180  | 29   | No           |
| CGH_R    | -0.17 | -0.32  | -0.02 | -2.22 | 0.014  | 0.029  | 22   | Yes          |
| FX_L     | -0.15 | -0.30  | 0.00  | -2.04 | 0.022  | 0.037  | 26   | Yes          |
| FX_R     | -0.15 | -0.30  | 0.00  | -1.99 | 0.024  | 0.040  | 27   | Yes          |
| ST_L     | -0.08 | -0.23  | 0.07  | -1.04 | 0.150  | 0.224  | 30   | No           |
| ST_R     | 0.02  | -0.13  | 0.16  | 0.21  | 0.418  | 0.427  | 44   | No           |
| UF_L     | -0.31 | -0.46  | -0.16 | -4.06 | <0.001 | <0.001 | 4    | Yes          |
| UF_R     | -0.26 | -0.41  | -0.11 | -3.43 | <0.001 | 0.003  | 6    | Yes          |
| IFOF_L   | -0.24 | -0.39  | -0.09 | -3.14 | 0.001  | 0.004  | 10   | Yes          |
| IFOF_R   | -0.22 | -0.36  | -0.07 | -2.85 | 0.002  | 0.007  | 16   | Yes          |
| ILF_L    | -0.03 | -0.18  | 0.12  | -0.38 | 0.352  | 0.406  | 39   | No           |
| ILF_R    | -0.04 | -0.19  | 0.11  | -0.50 | 0.309  | 0.366  | 38   | No           |
| FS_PFC_L | -0.25 | -0.40  | -0.10 | -3.26 | 0.001  | 0.004  | 8    | Yes          |
| FS_PFC_R | -0.21 | -0.36  | -0.06 | -2.80 | 0.003  | 0.007  | 17   | Yes          |

|                  |       |       |       |       |        |        |    |     |
|------------------|-------|-------|-------|-------|--------|--------|----|-----|
| <b>FS_M_L</b>    | -0.04 | -0.19 | 0.10  | -0.59 | 0.278  | 0.347  | 36 | No  |
| <b>FS_M_R</b>    | -0.07 | -0.22 | 0.08  | -0.89 | 0.187  | 0.254  | 33 | No  |
| <b>TR_PFC_L</b>  | -0.20 | -0.35 | -0.05 | -2.68 | 0.004  | 0.010  | 18 | Yes |
| <b>TR_PFC_R</b>  | -0.19 | -0.34 | -0.04 | -2.49 | 0.007  | 0.016  | 19 | Yes |
| <b>TR_SM_L</b>   | -0.07 | -0.22 | 0.08  | -0.95 | 0.172  | 0.242  | 32 | No  |
| <b>TR_SM_R</b>   | -0.02 | -0.17 | 0.13  | -0.28 | 0.390  | 0.418  | 42 | No  |
| <b>TR_aud_L</b>  | -0.23 | -0.38 | -0.08 | -3.05 | 0.001  | 0.005  | 11 | Yes |
| <b>TR_aud_R</b>  | -0.18 | -0.33 | -0.03 | -2.34 | 0.010  | 0.022  | 21 | Yes |
| <b>TR_opt_L</b>  | -0.02 | -0.17 | 0.13  | -0.24 | 0.406  | 0.425  | 43 | No  |
| <b>TR_opt_R</b>  | -0.02 | -0.17 | 0.13  | -0.30 | 0.381  | 0.418  | 41 | No  |
| <b>CST_L</b>     | 0.06  | -0.09 | 0.21  | 0.81  | 0.208  | 0.268  | 35 | No  |
| <b>CST_R</b>     | 0.11  | -0.04 | 0.26  | 1.47  | 0.072  | 0.116  | 28 | No  |
| <b>CC_PFC</b>    | -0.47 | -0.63 | -0.31 | -6.20 | <0.001 | <0.001 | 1  | Yes |
| <b>CC_SM</b>     | -0.16 | -0.31 | -0.01 | -2.13 | 0.017  | 0.033  | 24 | Yes |
| <b>CC_pariet</b> | -0.07 | -0.21 | 0.08  | -0.88 | 0.191  | 0.253  | 34 | No  |
| <b>CC_temp</b>   | -0.22 | -0.37 | -0.07 | -2.91 | 0.002  | 0.007  | 14 | Yes |
| <b>CC_splen</b>  | -0.07 | -0.22 | 0.08  | -0.96 | 0.169  | 0.245  | 31 | No  |

### Result S1-3: Mean deviation effect size of siblings of people with ADHD

The effect size (ES) of the mean deviation of siblings of people with ADHD, lower and upper bound of confidence interval (CI). The t-statistics, p-value, and adjusted p-value by Benjamini correction (FDR  $q=0.05$ ), the rank of p-value and whether the tract is significant after multiple corrections.

|          | ES    | CI_low | CI_up | t     | p     | p_adj | rank | Significance |
|----------|-------|--------|-------|-------|-------|-------|------|--------------|
| AF_L     | 0.01  | -0.16  | 0.19  | 0.15  | 0.440 | 0.507 | 39   | No           |
| AF_R     | -0.08 | -0.26  | 0.10  | -0.91 | 0.183 | 0.435 | 19   | No           |
| SLF1_L   | 0.06  | -0.11  | 0.24  | 0.71  | 0.239 | 0.468 | 23   | No           |
| SLF1_R   | 0.06  | -0.12  | 0.24  | 0.63  | 0.264 | 0.494 | 24   | No           |
| SLF2_L   | -0.03 | -0.21  | 0.15  | -0.36 | 0.360 | 0.463 | 35   | No           |
| SLF2_R   | -0.01 | -0.18  | 0.17  | -0.06 | 0.478 | 0.524 | 41   | No           |
| SLF3_L   | -0.03 | -0.21  | 0.14  | -0.38 | 0.351 | 0.479 | 33   | No           |
| SLF3_R   | -0.04 | -0.22  | 0.14  | -0.45 | 0.326 | 0.506 | 29   | No           |
| FAT_L    | 0.15  | -0.03  | 0.33  | 1.61  | 0.054 | 0.817 | 3    | No           |
| FAT_R    | -0.07 | -0.25  | 0.11  | -0.74 | 0.232 | 0.474 | 22   | No           |
| PF_L     | -0.02 | -0.20  | 0.16  | -0.21 | 0.415 | 0.492 | 38   | No           |
| PF_R     | 0.19  | 0.01   | 0.37  | 2.04  | 0.022 | 0.973 | 1    | No           |
| CGB_L    | -0.13 | -0.31  | 0.05  | -1.44 | 0.076 | 0.491 | 7    | No           |
| CGB_R    | 0.08  | -0.10  | 0.26  | 0.91  | 0.181 | 0.453 | 18   | No           |
| CGH_L    | 0.00  | -0.17  | 0.18  | 0.04  | 0.484 | 0.518 | 42   | No           |
| CGH_R    | 0.09  | -0.09  | 0.27  | 0.98  | 0.166 | 0.497 | 15   | No           |
| FX_L     | -0.12 | -0.30  | 0.06  | -1.31 | 0.097 | 0.435 | 10   | No           |
| FX_R     | -0.01 | -0.19  | 0.17  | -0.11 | 0.455 | 0.512 | 40   | No           |
| ST_L     | 0.11  | -0.06  | 0.29  | 1.26  | 0.104 | 0.426 | 11   | No           |
| ST_R     | 0.06  | -0.12  | 0.24  | 0.63  | 0.264 | 0.475 | 25   | No           |
| UF_L     | 0.08  | -0.10  | 0.25  | 0.83  | 0.204 | 0.460 | 20   | No           |
| UF_R     | -0.03 | -0.21  | 0.14  | -0.38 | 0.353 | 0.467 | 34   | No           |
| IFOF_L   | 0.05  | -0.12  | 0.23  | 0.59  | 0.278 | 0.447 | 28   | No           |
| IFOF_R   | -0.13 | -0.31  | 0.05  | -1.47 | 0.072 | 0.542 | 6    | No           |
| ILF_L    | 0.11  | -0.06  | 0.29  | 1.26  | 0.105 | 0.394 | 12   | No           |
| ILF_R    | 0.15  | -0.03  | 0.33  | 1.64  | 0.052 | 1.000 | 2    | No           |
| FS_PFC_L | 0.00  | -0.18  | 0.18  | 0.03  | 0.489 | 0.512 | 43   | No           |
| FS_PFC_R | -0.04 | -0.22  | 0.14  | -0.42 | 0.336 | 0.504 | 30   | No           |

|                  |       |       |      |       |       |       |    |    |
|------------------|-------|-------|------|-------|-------|-------|----|----|
| <b>FS_M_L</b>    | -0.11 | -0.29 | 0.07 | -1.21 | 0.113 | 0.393 | 13 | No |
| <b>FS_M_R</b>    | -0.02 | -0.20 | 0.16 | -0.25 | 0.403 | 0.490 | 37 | No |
| <b>TR_PFC_L</b>  | 0.14  | -0.04 | 0.32 | 1.52  | 0.065 | 0.588 | 5  | No |
| <b>TR_PFC_R</b>  | 0.06  | -0.12 | 0.24 | 0.62  | 0.267 | 0.462 | 26 | No |
| <b>TR_SM_L</b>   | -0.07 | -0.25 | 0.11 | -0.80 | 0.213 | 0.457 | 21 | No |
| <b>TR_SM_R</b>   | -0.05 | -0.23 | 0.12 | -0.60 | 0.275 | 0.458 | 27 | No |
| <b>TR_aud_L</b>  | 0.08  | -0.09 | 0.26 | 0.93  | 0.176 | 0.466 | 17 | No |
| <b>TR_aud_R</b>  | 0.00  | -0.18 | 0.18 | 0.01  | 0.495 | 0.506 | 44 | No |
| <b>TR_opt_L</b>  | 0.13  | -0.05 | 0.31 | 1.42  | 0.079 | 0.446 | 8  | No |
| <b>TR_opt_R</b>  | -0.03 | -0.21 | 0.15 | -0.33 | 0.370 | 0.463 | 36 | No |
| <b>CST_L</b>     | 0.09  | -0.09 | 0.26 | 0.94  | 0.175 | 0.493 | 16 | No |
| <b>CST_R</b>     | 0.15  | -0.03 | 0.32 | 1.60  | 0.056 | 0.633 | 4  | No |
| <b>CC_PFC</b>    | -0.10 | -0.28 | 0.08 | -1.10 | 0.137 | 0.439 | 14 | No |
| <b>CC_SM</b>     | -0.04 | -0.21 | 0.14 | -0.39 | 0.347 | 0.504 | 31 | No |
| <b>CC_pariet</b> | 0.13  | -0.05 | 0.31 | 1.40  | 0.082 | 0.410 | 9  | No |
| <b>CC_temp</b>   | 0.04  | -0.14 | 0.21 | 0.39  | 0.349 | 0.491 | 32 | No |
| <b>CC_splen</b>  | 0.00  | -0.18 | 0.18 | 0.01  | 0.496 | 0.496 | 45 | No |

### Result S1-4: Mean deviation effect size of siblings of people with ASD

The effect size (ES) of the mean deviation of siblings of people with ASD, lower and upper bound of the confidence interval (CI). The t-statistics, p-value, and adjusted p-value by Benjamini correction (FDR  $q=0.05$ ), the rank of p-value, and whether the tract is significant after multiple corrections.

|          | ES    | CI_low | CI_up | t     | p      | p_adj | rank | Significance |
|----------|-------|--------|-------|-------|--------|-------|------|--------------|
| AF_L     | -0.15 | -0.38  | 0.09  | -1.24 | 0.109  | 0.223 | 22   | No           |
| AF_R     | -0.17 | -0.40  | 0.06  | -1.44 | 0.077  | 0.165 | 21   | No           |
| SLF1_L   | -0.12 | -0.35  | 0.11  | -1.04 | 0.152  | 0.262 | 26   | No           |
| SLF1_R   | -0.07 | -0.30  | 0.16  | -0.59 | 0.277  | 0.357 | 35   | No           |
| SLF2_L   | -0.30 | -0.53  | -0.06 | -2.51 | 0.007  | 0.032 | 10   | Yes          |
| SLF2_R   | -0.42 | -0.66  | -0.18 | -3.56 | <0.001 | 0.008 | 2    | Yes          |
| SLF3_L   | -0.26 | -0.50  | -0.03 | -2.23 | 0.015  | 0.044 | 15   | Yes          |
| SLF3_R   | -0.20 | -0.43  | 0.04  | -1.68 | 0.049  | 0.115 | 19   | No           |
| FAT_L    | -0.34 | -0.58  | -0.10 | -2.88 | 0.003  | 0.024 | 5    | Yes          |
| FAT_R    | -0.30 | -0.54  | -0.07 | -2.56 | 0.006  | 0.031 | 9    | Yes          |
| PF_L     | -0.09 | -0.33  | 0.14  | -0.80 | 0.212  | 0.308 | 31   | No           |
| PF_R     | -0.14 | -0.37  | 0.09  | -1.17 | 0.124  | 0.223 | 25   | No           |
| CGB_L    | -0.32 | -0.56  | -0.09 | -2.74 | 0.004  | 0.025 | 7    | Yes          |
| CGB_R    | -0.20 | -0.44  | 0.03  | -1.72 | 0.045  | 0.119 | 17   | No           |
| CGH_L    | -0.20 | -0.43  | 0.03  | -1.70 | 0.047  | 0.118 | 18   | No           |
| CGH_R    | -0.14 | -0.38  | 0.09  | -1.22 | 0.114  | 0.223 | 23   | No           |
| FX_L     | 0.06  | -0.17  | 0.29  | 0.48  | 0.317  | 0.386 | 37   | No           |
| FX_R     | -0.10 | -0.33  | 0.13  | -0.85 | 0.199  | 0.308 | 29   | No           |
| ST_L     | 0.11  | -0.13  | 0.34  | 0.89  | 0.187  | 0.301 | 28   | No           |
| ST_R     | 0.02  | -0.21  | 0.25  | 0.14  | 0.443  | 0.453 | 44   | No           |
| UF_L     | -0.24 | -0.48  | -0.01 | -2.07 | 0.021  | 0.060 | 16   | No           |
| UF_R     | -0.14 | -0.38  | 0.09  | -1.22 | 0.114  | 0.214 | 24   | No           |
| IFOF_L   | -0.26 | -0.50  | -0.03 | -2.24 | 0.014  | 0.045 | 14   | Yes          |
| IFOF_R   | -0.33 | -0.57  | -0.10 | -2.83 | 0.003  | 0.023 | 6    | Yes          |
| ILF_L    | -0.10 | -0.33  | 0.13  | -0.85 | 0.199  | 0.299 | 30   | No           |
| ILF_R    | 0.04  | -0.19  | 0.27  | 0.34  | 0.366  | 0.422 | 39   | No           |
| FS_PFC_L | -0.39 | -0.63  | -0.15 | -3.28 | 0.001  | 0.009 | 4    | Yes          |
| FS_PFC_R | -0.39 | -0.63  | -0.15 | -3.31 | 0.001  | 0.011 | 3    | Yes          |

|                  |       |       |       |       |        |       |    |     |
|------------------|-------|-------|-------|-------|--------|-------|----|-----|
| <b>FS_M_L</b>    | -0.12 | -0.35 | 0.11  | -0.99 | 0.162  | 0.270 | 27 | No  |
| <b>FS_M_R</b>    | -0.04 | -0.27 | 0.19  | -0.35 | 0.363  | 0.430 | 38 | No  |
| <b>TR_PFC_L</b>  | -0.31 | -0.55 | -0.07 | -2.62 | 0.005  | 0.030 | 8  | Yes |
| <b>TR_PFC_R</b>  | -0.29 | -0.52 | -0.05 | -2.43 | 0.009  | 0.033 | 12 | Yes |
| <b>TR_SM_L</b>   | -0.29 | -0.53 | -0.06 | -2.47 | 0.008  | 0.033 | 11 | Yes |
| <b>TR_SM_R</b>   | -0.04 | -0.27 | 0.19  | -0.34 | 0.368  | 0.414 | 40 | No  |
| <b>TR_aud_L</b>  | -0.27 | -0.51 | -0.04 | -2.30 | 0.012  | 0.042 | 13 | Yes |
| <b>TR_aud_R</b>  | 0.03  | -0.20 | 0.26  | 0.24  | 0.406  | 0.425 | 43 | No  |
| <b>TR_opt_L</b>  | 0.00  | -0.24 | 0.23  | -0.04 | 0.483  | 0.483 | 45 | No  |
| <b>TR_opt_R</b>  | 0.07  | -0.16 | 0.30  | 0.59  | 0.279  | 0.348 | 36 | No  |
| <b>CST_L</b>     | -0.04 | -0.27 | 0.19  | -0.31 | 0.378  | 0.415 | 41 | No  |
| <b>CST_R</b>     | 0.07  | -0.16 | 0.30  | 0.62  | 0.269  | 0.355 | 34 | No  |
| <b>CC_PFC</b>    | -0.46 | -0.70 | -0.21 | -3.87 | <0.001 | 0.005 | 1  | Yes |
| <b>CC_SM</b>     | -0.09 | -0.32 | 0.14  | -0.76 | 0.223  | 0.314 | 32 | No  |
| <b>CC_pariet</b> | 0.08  | -0.15 | 0.31  | 0.66  | 0.256  | 0.349 | 33 | No  |
| <b>CC_temp</b>   | -0.17 | -0.40 | 0.06  | -1.44 | 0.077  | 0.172 | 20 | No  |
| <b>CC_splen</b>  | -0.03 | -0.26 | 0.20  | -0.26 | 0.397  | 0.426 | 42 | No  |



### Result S2-1: Mean deviation effect size of children with ADHD

The effect size of the mean deviation of children with ADHD, lower and upper bound of the confidence interval. The t-statistics, p-value, and adjusted p-value by Benjamini correction (FDR  $q=0.05$ ), the rank of p-value and whether the tract is significant after multiple corrections.

|          | ES    | CI_low | CI_up | t     | p      | p_adj | rank | Significance |
|----------|-------|--------|-------|-------|--------|-------|------|--------------|
| AF_L     | -0.19 | -0.35  | -0.03 | -2.29 | 0.012  | 0.052 | 10   | Yes          |
| AF_R     | -0.29 | -0.45  | -0.12 | -3.51 | <0.001 | 0.007 | 2    | Yes          |
| SLF1_L   | -0.06 | -0.22  | 0.10  | -0.75 | 0.228  | 0.278 | 37   | No           |
| SLF1_R   | -0.10 | -0.26  | 0.06  | -1.19 | 0.119  | 0.178 | 30   | No           |
| SLF2_L   | -0.15 | -0.32  | 0.01  | -1.87 | 0.032  | 0.062 | 23   | No           |
| SLF2_R   | -0.19 | -0.35  | -0.02 | -2.25 | 0.013  | 0.054 | 11   | Yes          |
| SLF3_L   | -0.13 | -0.29  | 0.03  | -1.55 | 0.062  | 0.107 | 26   | No           |
| SLF3_R   | -0.21 | -0.38  | -0.05 | -2.57 | 0.006  | 0.042 | 6    | Yes          |
| FAT_L    | -0.03 | -0.19  | 0.14  | -0.32 | 0.374  | 0.391 | 43   | No           |
| FAT_R    | -0.18 | -0.35  | -0.02 | -2.22 | 0.014  | 0.052 | 12   | Yes          |
| PF_L     | -0.18 | -0.34  | -0.02 | -2.19 | 0.015  | 0.049 | 14   | Yes          |
| PF_R     | 0.05  | -0.11  | 0.21  | 0.65  | 0.260  | 0.308 | 38   | No           |
| CGB_L    | -0.33 | -0.50  | -0.16 | -4.01 | <0.001 | 0.002 | 1    | Yes          |
| CGB_R    | -0.03 | -0.19  | 0.13  | -0.33 | 0.370  | 0.396 | 42   | No           |
| CGH_L    | -0.17 | -0.33  | -0.01 | -2.09 | 0.019  | 0.051 | 17   | Yes          |
| CGH_R    | -0.03 | -0.19  | 0.13  | -0.40 | 0.346  | 0.380 | 41   | No           |
| FX_L     | -0.11 | -0.28  | 0.05  | -1.37 | 0.086  | 0.144 | 27   | No           |
| FX_R     | 0.00  | -0.16  | 0.17  | 0.04  | 0.482  | 0.482 | 45   | No           |
| ST_L     | -0.05 | -0.21  | 0.12  | -0.55 | 0.292  | 0.328 | 40   | No           |
| ST_R     | -0.18 | -0.34  | -0.01 | -2.16 | 0.016  | 0.049 | 15   | Yes          |
| UF_L     | -0.17 | -0.34  | -0.01 | -2.10 | 0.019  | 0.053 | 16   | Yes          |
| UF_R     | -0.14 | -0.30  | 0.03  | -1.65 | 0.050  | 0.091 | 25   | No           |
| IFOF_L   | -0.24 | -0.40  | -0.07 | -2.87 | 0.002  | 0.026 | 4    | Yes          |
| IFOF_R   | -0.20 | -0.37  | -0.04 | -2.47 | 0.007  | 0.047 | 7    | Yes          |
| ILF_L    | -0.14 | -0.30  | 0.02  | -1.73 | 0.043  | 0.081 | 24   | No           |
| ILF_R    | -0.01 | -0.17  | 0.15  | -0.10 | 0.460  | 0.470 | 44   | No           |
| FS_PFC_L | -0.22 | -0.38  | -0.06 | -2.67 | 0.004  | 0.038 | 5    | Yes          |
| FS_PFC_R | -0.18 | -0.35  | -0.02 | -2.22 | 0.014  | 0.048 | 13   | Yes          |
| FS_M_L   | -0.11 | -0.27  | 0.05  | -1.33 | 0.094  | 0.150 | 28   | No           |

|                  |       |       |       |       |       |       |    |     |
|------------------|-------|-------|-------|-------|-------|-------|----|-----|
| <b>FS_M_R</b>    | -0.25 | -0.41 | -0.09 | -3.04 | 0.001 | 0.021 | 3  | Yes |
| <b>TR_PFC_L</b>  | -0.17 | -0.33 | -0.01 | -2.06 | 0.020 | 0.048 | 19 | Yes |
| <b>TR_PFC_R</b>  | -0.08 | -0.24 | 0.08  | -0.94 | 0.176 | 0.232 | 34 | No  |
| <b>TR_SM_L</b>   | -0.17 | -0.33 | -0.01 | -2.07 | 0.020 | 0.051 | 18 | Yes |
| <b>TR_SM_R</b>   | -0.08 | -0.24 | 0.08  | -0.95 | 0.171 | 0.233 | 33 | No  |
| <b>TR_aud_L</b>  | -0.20 | -0.36 | -0.04 | -2.44 | 0.008 | 0.040 | 9  | Yes |
| <b>TR_aud_R</b>  | -0.20 | -0.36 | -0.04 | -2.44 | 0.008 | 0.045 | 8  | Yes |
| <b>TR_opt_L</b>  | -0.16 | -0.32 | 0.01  | -1.91 | 0.029 | 0.060 | 22 | No  |
| <b>TR_opt_R</b>  | -0.05 | -0.21 | 0.11  | -0.63 | 0.266 | 0.307 | 39 | No  |
| <b>CST_L</b>     | -0.06 | -0.23 | 0.10  | -0.78 | 0.218 | 0.272 | 36 | No  |
| <b>CST_R</b>     | -0.11 | -0.27 | 0.05  | -1.31 | 0.096 | 0.150 | 29 | No  |
| <b>CC_PFC</b>    | -0.08 | -0.24 | 0.09  | -0.91 | 0.182 | 0.234 | 35 | No  |
| <b>CC_SM</b>     | -0.10 | -0.26 | 0.06  | -1.19 | 0.119 | 0.172 | 31 | No  |
| <b>CC_pariet</b> | -0.08 | -0.24 | 0.08  | -0.96 | 0.169 | 0.238 | 32 | No  |
| <b>CC_temp</b>   | -0.16 | -0.32 | 0.00  | -1.95 | 0.026 | 0.060 | 20 | No  |
| <b>CC_splen</b>  | -0.16 | -0.32 | 0.00  | -1.95 | 0.027 | 0.057 | 21 | No  |

## Result S2-2: Mean deviation effect size of adults with ADHD

The effect size of the mean deviation of adults with ADHD, lower and upper bound of confidence interval. The t-statistics, p-value, and adjusted p value by Benjamini correction (FDR  $q=0.05$ ), the rank of p-value and whether the tract is significant after multiple corrections.

|          | ES    | CI_low | CI_up | t     | p     | p_adj | rank | Significance |
|----------|-------|--------|-------|-------|-------|-------|------|--------------|
| AF_L     | -0.22 | -0.39  | -0.05 | -2.51 | 0.007 | 0.099 | 3    | No           |
| AF_R     | -0.08 | -0.25  | 0.09  | -0.95 | 0.172 | 0.298 | 26   | No           |
| SLF1_L   | -0.05 | -0.22  | 0.12  | -0.61 | 0.270 | 0.328 | 37   | No           |
| SLF1_R   | -0.23 | -0.40  | -0.05 | -2.59 | 0.005 | 0.120 | 2    | No           |
| SLF2_L   | -0.05 | -0.22  | 0.12  | -0.61 | 0.270 | 0.320 | 38   | No           |
| SLF2_R   | -0.08 | -0.25  | 0.09  | -0.92 | 0.181 | 0.301 | 27   | No           |
| SLF3_L   | -0.06 | -0.24  | 0.11  | -0.74 | 0.231 | 0.324 | 32   | No           |
| SLF3_R   | -0.01 | -0.18  | 0.16  | -0.14 | 0.443 | 0.464 | 43   | No           |
| FAT_L    | 0.00  | -0.17  | 0.17  | 0.01  | 0.495 | 0.495 | 45   | No           |
| FAT_R    | -0.06 | -0.23  | 0.11  | -0.69 | 0.245 | 0.334 | 33   | No           |
| PF_L     | -0.06 | -0.23  | 0.11  | -0.66 | 0.255 | 0.328 | 35   | No           |
| PF_R     | 0.03  | -0.14  | 0.20  | 0.30  | 0.382 | 0.409 | 42   | No           |
| CGB_L    | -0.18 | -0.35  | 0.00  | -2.01 | 0.023 | 0.115 | 9    | No           |
| CGB_R    | -0.14 | -0.31  | 0.03  | -1.64 | 0.051 | 0.154 | 15   | No           |
| CGH_L    | 0.15  | -0.02  | 0.32  | 1.69  | 0.047 | 0.151 | 14   | No           |
| CGH_R    | -0.09 | -0.26  | 0.08  | -1.06 | 0.146 | 0.273 | 24   | No           |
| FX_L     | -0.17 | -0.34  | 0.00  | -1.96 | 0.026 | 0.118 | 10   | No           |
| FX_R     | -0.07 | -0.24  | 0.10  | -0.76 | 0.224 | 0.335 | 30   | No           |
| ST_L     | 0.03  | -0.14  | 0.20  | 0.31  | 0.377 | 0.414 | 41   | No           |
| ST_R     | 0.15  | -0.02  | 0.32  | 1.75  | 0.041 | 0.169 | 11   | No           |
| UF_L     | -0.07 | -0.24  | 0.10  | -0.82 | 0.207 | 0.321 | 29   | No           |
| UF_R     | -0.12 | -0.29  | 0.05  | -1.39 | 0.084 | 0.180 | 21   | No           |
| IFOF_L   | -0.08 | -0.25  | 0.09  | -0.90 | 0.185 | 0.297 | 28   | No           |
| IFOF_R   | -0.14 | -0.31  | 0.03  | -1.63 | 0.052 | 0.147 | 16   | No           |
| ILF_L    | 0.11  | -0.06  | 0.28  | 1.22  | 0.112 | 0.230 | 22   | No           |
| ILF_R    | 0.15  | -0.02  | 0.32  | 1.70  | 0.046 | 0.158 | 13   | No           |
| FS_PFC_L | -0.09 | -0.26  | 0.08  | -1.01 | 0.156 | 0.281 | 25   | No           |
| FS_PFC_R | -0.15 | -0.32  | 0.02  | -1.71 | 0.045 | 0.169 | 12   | No           |
| FS_M_L   | -0.12 | -0.30  | 0.05  | -1.42 | 0.079 | 0.186 | 19   | No           |

|                  |       |       |       |       |       |       |    |     |
|------------------|-------|-------|-------|-------|-------|-------|----|-----|
| <b>FS_M_R</b>    | -0.06 | -0.23 | 0.11  | -0.69 | 0.246 | 0.325 | 34 | No  |
| <b>TR_PFC_L</b>  | -0.13 | -0.30 | 0.04  | -1.47 | 0.071 | 0.179 | 18 | No  |
| <b>TR_PFC_R</b>  | -0.19 | -0.36 | -0.01 | -2.13 | 0.017 | 0.156 | 5  | No  |
| <b>TR_SM_L</b>   | -0.10 | -0.27 | 0.08  | -1.09 | 0.138 | 0.271 | 23 | No  |
| <b>TR_SM_R</b>   | -0.07 | -0.24 | 0.10  | -0.76 | 0.225 | 0.327 | 31 | No  |
| <b>TR_aud_L</b>  | -0.12 | -0.29 | 0.05  | -1.42 | 0.079 | 0.178 | 20 | No  |
| <b>TR_aud_R</b>  | -0.18 | -0.36 | -0.01 | -2.11 | 0.018 | 0.119 | 7  | No  |
| <b>TR_opt_L</b>  | 0.06  | -0.12 | 0.23  | 0.63  | 0.264 | 0.330 | 36 | No  |
| <b>TR_opt_R</b>  | 0.01  | -0.16 | 0.18  | 0.10  | 0.461 | 0.472 | 44 | No  |
| <b>CST_L</b>     | -0.13 | -0.31 | 0.04  | -1.54 | 0.063 | 0.167 | 17 | No  |
| <b>CST_R</b>     | -0.05 | -0.22 | 0.13  | -0.52 | 0.302 | 0.339 | 40 | No  |
| <b>CC_PFC</b>    | -0.28 | -0.45 | -0.11 | -3.23 | 0.001 | 0.035 | 1  | Yes |
| <b>CC_SM</b>     | -0.19 | -0.36 | -0.01 | -2.14 | 0.017 | 0.191 | 4  | No  |
| <b>CC_pariet</b> | -0.05 | -0.22 | 0.13  | -0.52 | 0.301 | 0.348 | 39 | No  |
| <b>CC_temp</b>   | -0.18 | -0.36 | -0.01 | -2.12 | 0.018 | 0.135 | 6  | No  |
| <b>CC_splen</b>  | -0.18 | -0.35 | -0.01 | -2.06 | 0.021 | 0.117 | 8  | No  |

### Result S2-3: Mean deviation effect size of children with ASD

The effect size of the mean deviation of children with ASD, lower and upper bound of the confidence interval. The t-statistics, p-value, and adjusted p-value by Benjamini correction (FDR  $q=0.05$ ), the rank of p-value and whether the tract is significant after multiple corrections.

|          | ES    | CI_low | CI_up | t     | p      | p_adj  | rank | Significance |
|----------|-------|--------|-------|-------|--------|--------|------|--------------|
| AF_L     | -0.30 | -0.49  | -0.10 | -3.04 | 0.001  | 0.011  | 6    | Yes          |
| AF_R     | -0.23 | -0.42  | -0.03 | -2.30 | 0.012  | 0.035  | 15   | Yes          |
| SLF1_L   | 0.08  | -0.12  | 0.27  | 0.79  | 0.217  | 0.263  | 37   | No           |
| SLF1_R   | 0.07  | -0.12  | 0.27  | 0.74  | 0.229  | 0.271  | 38   | No           |
| SLF2_L   | -0.25 | -0.44  | -0.05 | -2.51 | 0.007  | 0.028  | 11   | Yes          |
| SLF2_R   | -0.20 | -0.40  | -0.01 | -2.08 | 0.020  | 0.048  | 19   | Yes          |
| SLF3_L   | -0.16 | -0.36  | 0.03  | -1.67 | 0.049  | 0.079  | 28   | No           |
| SLF3_R   | -0.24 | -0.43  | -0.04 | -2.41 | 0.009  | 0.033  | 12   | Yes          |
| FAT_L    | -0.22 | -0.41  | -0.02 | -2.22 | 0.014  | 0.040  | 16   | Yes          |
| FAT_R    | -0.16 | -0.36  | 0.03  | -1.66 | 0.050  | 0.077  | 29   | No           |
| PF_L     | -0.26 | -0.46  | -0.07 | -2.68 | 0.004  | 0.027  | 7    | Yes          |
| PF_R     | -0.11 | -0.30  | 0.08  | -1.10 | 0.137  | 0.186  | 33   | No           |
| CGB_L    | -0.31 | -0.51  | -0.11 | -3.16 | 0.001  | 0.009  | 5    | Yes          |
| CGB_R    | -0.19 | -0.38  | 0.01  | -1.92 | 0.029  | 0.054  | 24   | No           |
| CGH_L    | -0.11 | -0.31  | 0.08  | -1.16 | 0.125  | 0.181  | 31   | No           |
| CGH_R    | -0.17 | -0.36  | 0.02  | -1.74 | 0.043  | 0.071  | 27   | No           |
| FX_L     | -0.21 | -0.40  | -0.02 | -2.15 | 0.017  | 0.043  | 18   | Yes          |
| FX_R     | -0.20 | -0.39  | 0.00  | -2.00 | 0.024  | 0.051  | 21   | No           |
| ST_L     | -0.23 | -0.43  | -0.04 | -2.37 | 0.010  | 0.032  | 14   | Yes          |
| ST_R     | -0.10 | -0.30  | 0.09  | -1.06 | 0.145  | 0.192  | 34   | No           |
| UF_L     | -0.41 | -0.61  | -0.21 | -4.20 | <0.001 | <0.001 | 3    | Yes          |
| UF_R     | -0.42 | -0.62  | -0.22 | -4.30 | <0.001 | <0.001 | 2    | Yes          |
| IFOF_L   | -0.25 | -0.45  | -0.06 | -2.59 | 0.005  | 0.031  | 8    | Yes          |
| IFOF_R   | -0.33 | -0.53  | -0.13 | -3.37 | 0.001  | 0.006  | 4    | Yes          |
| ILF_L    | -0.19 | -0.39  | 0.00  | -1.95 | 0.027  | 0.053  | 23   | No           |
| ILF_R    | -0.18 | -0.37  | 0.02  | -1.79 | 0.038  | 0.066  | 26   | No           |
| FS_PFC_L | -0.25 | -0.45  | -0.06 | -2.57 | 0.006  | 0.029  | 9    | Yes          |
| FS_PFC_R | -0.22 | -0.41  | -0.02 | -2.20 | 0.015  | 0.040  | 17   | Yes          |
| FS_M_L   | -0.07 | -0.26  | 0.12  | -0.74 | 0.231  | 0.266  | 39   | No           |

|                  |       |       |       |       |        |        |    |     |
|------------------|-------|-------|-------|-------|--------|--------|----|-----|
| <b>FS_M_R</b>    | -0.14 | -0.34 | 0.05  | -1.47 | 0.072  | 0.108  | 30 | No  |
| <b>TR_PFC_L</b>  | -0.19 | -0.39 | 0.00  | -1.96 | 0.026  | 0.054  | 22 | No  |
| <b>TR_PFC_R</b>  | -0.23 | -0.43 | -0.04 | -2.39 | 0.009  | 0.032  | 13 | Yes |
| <b>TR_SM_L</b>   | -0.02 | -0.22 | 0.17  | -0.25 | 0.401  | 0.410  | 44 | No  |
| <b>TR_SM_R</b>   | -0.02 | -0.22 | 0.17  | -0.23 | 0.408  | 0.408  | 45 | No  |
| <b>TR_aud_L</b>  | -0.10 | -0.29 | 0.10  | -0.98 | 0.163  | 0.210  | 35 | No  |
| <b>TR_aud_R</b>  | -0.19 | -0.38 | 0.01  | -1.90 | 0.030  | 0.055  | 25 | No  |
| <b>TR_opt_L</b>  | -0.05 | -0.25 | 0.14  | -0.56 | 0.289  | 0.325  | 40 | No  |
| <b>TR_opt_R</b>  | -0.20 | -0.39 | 0.00  | -2.02 | 0.023  | 0.052  | 20 | No  |
| <b>CST_L</b>     | 0.05  | -0.15 | 0.24  | 0.46  | 0.323  | 0.355  | 41 | No  |
| <b>CST_R</b>     | 0.09  | -0.10 | 0.28  | 0.93  | 0.177  | 0.222  | 36 | No  |
| <b>CC_PFC</b>    | -0.43 | -0.63 | -0.23 | -4.37 | <0.001 | <0.001 | 1  | Yes |
| <b>CC_SM</b>     | -0.04 | -0.23 | 0.15  | -0.40 | 0.347  | 0.371  | 42 | No  |
| <b>CC_pariet</b> | -0.03 | -0.22 | 0.16  | -0.28 | 0.390  | 0.408  | 43 | No  |
| <b>CC_temp</b>   | -0.25 | -0.45 | -0.06 | -2.57 | 0.006  | 0.026  | 10 | Yes |
| <b>CC_splen</b>  | -0.11 | -0.30 | 0.08  | -1.14 | 0.128  | 0.181  | 32 | No  |

## Result S2-4: Mean deviation effect size of adults with ASD

The effect size of the mean deviation of adults with ASD, lower and upper bound of the confidence interval. The t-statistics, p-value, and adjusted p-value by Benjamini correction (FDR  $q=0.05$ ), the rank of p-value and whether the tract is significant after multiple corrections.

|          | ES    | CI_low | CI_up | t     | p     | p_adj | rank | Significance |
|----------|-------|--------|-------|-------|-------|-------|------|--------------|
| AF_L     | -0.39 | -0.63  | -0.15 | -3.29 | 0.001 | 0.009 | 4    | Yes          |
| AF_R     | -0.23 | -0.47  | 0.00  | -1.96 | 0.027 | 0.111 | 11   | No           |
| SLF1_L   | -0.16 | -0.40  | 0.07  | -1.36 | 0.088 | 0.166 | 24   | No           |
| SLF1_R   | -0.12 | -0.35  | 0.12  | -0.98 | 0.166 | 0.226 | 33   | No           |
| SLF2_L   | -0.17 | -0.41  | 0.06  | -1.46 | 0.074 | 0.166 | 20   | No           |
| SLF2_R   | -0.25 | -0.48  | -0.01 | -2.07 | 0.021 | 0.119 | 8    | No           |
| SLF3_L   | -0.22 | -0.45  | 0.02  | -1.83 | 0.036 | 0.115 | 14   | No           |
| SLF3_R   | -0.26 | -0.49  | -0.02 | -2.16 | 0.017 | 0.110 | 7    | No           |
| FAT_L    | -0.32 | -0.56  | -0.08 | -2.67 | 0.005 | 0.042 | 5    | Yes          |
| FAT_R    | -0.15 | -0.39  | 0.08  | -1.30 | 0.099 | 0.171 | 26   | No           |
| PF_L     | -0.24 | -0.48  | -0.01 | -2.04 | 0.023 | 0.113 | 9    | No           |
| PF_R     | 0.05  | -0.18  | 0.28  | 0.42  | 0.337 | 0.389 | 39   | No           |
| CGB_L    | -0.40 | -0.64  | -0.16 | -3.36 | 0.001 | 0.010 | 3    | Yes          |
| CGB_R    | -0.13 | -0.37  | 0.10  | -1.13 | 0.132 | 0.198 | 30   | No           |
| CGH_L    | -0.06 | -0.29  | 0.18  | -0.48 | 0.316 | 0.375 | 38   | No           |
| CGH_R    | -0.16 | -0.40  | 0.07  | -1.39 | 0.085 | 0.166 | 23   | No           |
| FX_L     | -0.06 | -0.29  | 0.17  | -0.52 | 0.304 | 0.380 | 36   | No           |
| FX_R     | -0.07 | -0.30  | 0.16  | -0.60 | 0.274 | 0.353 | 35   | No           |
| ST_L     | 0.14  | -0.09  | 0.38  | 1.21  | 0.115 | 0.192 | 27   | No           |
| ST_R     | 0.22  | -0.02  | 0.45  | 1.85  | 0.035 | 0.119 | 13   | No           |
| UF_L     | -0.18 | -0.41  | 0.06  | -1.50 | 0.069 | 0.163 | 19   | No           |
| UF_R     | -0.06 | -0.29  | 0.18  | -0.48 | 0.316 | 0.384 | 37   | No           |
| IFOF_L   | -0.21 | -0.44  | 0.03  | -1.77 | 0.041 | 0.108 | 17   | No           |
| IFOF_R   | -0.04 | -0.28  | 0.19  | -0.36 | 0.360 | 0.405 | 40   | No           |
| ILF_L    | 0.21  | -0.02  | 0.45  | 1.78  | 0.040 | 0.111 | 16   | No           |
| ILF_R    | 0.16  | -0.07  | 0.39  | 1.35  | 0.091 | 0.164 | 25   | No           |
| FS_PFC_L | -0.24 | -0.47  | 0.00  | -1.99 | 0.026 | 0.115 | 10   | No           |
| FS_PFC_R | -0.21 | -0.44  | 0.03  | -1.73 | 0.044 | 0.110 | 18   | No           |
| FS_M_L   | -0.01 | -0.24  | 0.22  | -0.08 | 0.469 | 0.469 | 45   | No           |

|                  |       |       |       |       |        |       |    |     |
|------------------|-------|-------|-------|-------|--------|-------|----|-----|
| <b>FS_M_R</b>    | 0.01  | -0.22 | 0.24  | 0.09  | 0.463  | 0.474 | 44 | No  |
| <b>TR_PFC_L</b>  | -0.22 | -0.45 | 0.02  | -1.81 | 0.037  | 0.111 | 15 | No  |
| <b>TR_PFC_R</b>  | -0.12 | -0.35 | 0.11  | -1.02 | 0.155  | 0.225 | 31 | No  |
| <b>TR_SM_L</b>   | -0.14 | -0.37 | 0.10  | -1.15 | 0.128  | 0.198 | 29 | No  |
| <b>TR_SM_R</b>   | -0.02 | -0.25 | 0.21  | -0.15 | 0.439  | 0.470 | 42 | No  |
| <b>TR_aud_L</b>  | -0.43 | -0.68 | -0.19 | -3.64 | <0.001 | 0.006 | 2  | Yes |
| <b>TR_aud_R</b>  | -0.17 | -0.40 | 0.07  | -1.40 | 0.083  | 0.169 | 22 | No  |
| <b>TR_opt_L</b>  | 0.04  | -0.19 | 0.27  | 0.34  | 0.368  | 0.404 | 41 | No  |
| <b>TR_opt_R</b>  | 0.22  | -0.01 | 0.46  | 1.87  | 0.033  | 0.123 | 12 | No  |
| <b>CST_L</b>     | 0.08  | -0.15 | 0.32  | 0.71  | 0.239  | 0.316 | 34 | No  |
| <b>CST_R</b>     | 0.14  | -0.09 | 0.37  | 1.18  | 0.122  | 0.196 | 28 | No  |
| <b>CC_PFC</b>    | -0.53 | -0.78 | -0.28 | -4.44 | <0.001 | 0.001 | 1  | Yes |
| <b>CC_SM</b>     | -0.32 | -0.55 | -0.08 | -2.66 | 0.005  | 0.036 | 6  | Yes |
| <b>CC_pariet</b> | -0.12 | -0.35 | 0.12  | -0.99 | 0.162  | 0.228 | 32 | No  |
| <b>CC_temp</b>   | -0.17 | -0.41 | 0.06  | -1.46 | 0.075  | 0.160 | 21 | No  |
| <b>CC_splen</b>  | -0.01 | -0.24 | 0.22  | -0.10 | 0.461  | 0.482 | 43 | No  |



### Result S3-1: Mean deviation effect size of men and boys with ADHD

Effect size of mean deviation of men and boys with ADHD, lower and upper bound of the confidence interval. The t-statistics, p-value, and adjusted p-value by Benjamini correction (FDR  $q=0.05$ ), the rank of p-value and whether the tract is significant after multiple correction.

|          | ES    | CI_low | CI_up | t     | p     | p_adj | rank | Significance |
|----------|-------|--------|-------|-------|-------|-------|------|--------------|
| AF_L     | -0.14 | -0.28  | 0.00  | -2.02 | 0.022 | 0.168 | 6    | No           |
| AF_R     | -0.17 | -0.31  | -0.03 | -2.42 | 0.008 | 0.124 | 3    | No           |
| SLF1_L   | -0.04 | -0.17  | 0.10  | -0.53 | 0.297 | 0.382 | 35   | No           |
| SLF1_R   | -0.13 | -0.27  | 0.00  | -1.92 | 0.028 | 0.159 | 8    | No           |
| SLF2_L   | 0.00  | -0.13  | 0.14  | 0.05  | 0.479 | 0.479 | 45   | No           |
| SLF2_R   | -0.07 | -0.21  | 0.07  | -0.99 | 0.161 | 0.329 | 22   | No           |
| SLF3_L   | 0.02  | -0.12  | 0.16  | 0.27  | 0.394 | 0.432 | 41   | No           |
| SLF3_R   | -0.12 | -0.26  | 0.02  | -1.69 | 0.047 | 0.191 | 11   | No           |
| FAT_L    | 0.07  | -0.07  | 0.21  | 1.00  | 0.159 | 0.340 | 21   | No           |
| FAT_R    | -0.11 | -0.25  | 0.02  | -1.62 | 0.053 | 0.200 | 12   | No           |
| PF_L     | -0.12 | -0.26  | 0.01  | -1.78 | 0.038 | 0.171 | 10   | No           |
| PF_R     | 0.04  | -0.09  | 0.18  | 0.61  | 0.272 | 0.360 | 34   | No           |
| CGB_L    | -0.18 | -0.32  | -0.04 | -2.55 | 0.006 | 0.261 | 1    | No           |
| CGB_R    | 0.00  | -0.14  | 0.13  | -0.07 | 0.473 | 0.483 | 44   | No           |
| CGH_L    | 0.03  | -0.11  | 0.17  | 0.41  | 0.343 | 0.395 | 39   | No           |
| CGH_R    | 0.01  | -0.12  | 0.15  | 0.19  | 0.425 | 0.445 | 43   | No           |
| FX_L     | -0.08 | -0.22  | 0.06  | -1.15 | 0.125 | 0.313 | 18   | No           |
| FX_R     | -0.03 | -0.17  | 0.11  | -0.44 | 0.329 | 0.390 | 38   | No           |
| ST_L     | -0.03 | -0.17  | 0.10  | -0.48 | 0.315 | 0.383 | 37   | No           |
| ST_R     | -0.04 | -0.18  | 0.09  | -0.62 | 0.267 | 0.375 | 32   | No           |
| UF_L     | -0.05 | -0.19  | 0.09  | -0.74 | 0.231 | 0.371 | 28   | No           |
| UF_R     | -0.08 | -0.22  | 0.05  | -1.19 | 0.117 | 0.330 | 16   | No           |
| IFOF_L   | -0.08 | -0.21  | 0.06  | -1.10 | 0.137 | 0.324 | 19   | No           |
| IFOF_R   | -0.09 | -0.23  | 0.05  | -1.27 | 0.103 | 0.357 | 13   | No           |
| ILF_L    | -0.03 | -0.17  | 0.11  | -0.40 | 0.343 | 0.386 | 40   | No           |
| ILF_R    | 0.08  | -0.05  | 0.22  | 1.19  | 0.117 | 0.352 | 15   | No           |
| FS_PFC_L | -0.05 | -0.19  | 0.09  | -0.72 | 0.235 | 0.365 | 29   | No           |
| FS_PFC_R | -0.07 | -0.21  | 0.07  | -1.01 | 0.158 | 0.355 | 20   | No           |
| FS_M_L   | -0.06 | -0.20  | 0.08  | -0.83 | 0.203 | 0.352 | 26   | No           |

|                  |       |       |       |       |       |       |    |    |
|------------------|-------|-------|-------|-------|-------|-------|----|----|
| <b>FS_M_R</b>    | -0.09 | -0.22 | 0.05  | -1.26 | 0.105 | 0.338 | 14 | No |
| <b>TR_PFC_L</b>  | -0.06 | -0.20 | 0.08  | -0.88 | 0.189 | 0.369 | 23 | No |
| <b>TR_PFC_R</b>  | -0.05 | -0.19 | 0.08  | -0.76 | 0.225 | 0.375 | 27 | No |
| <b>TR_SM_L</b>   | -0.16 | -0.29 | -0.02 | -2.23 | 0.013 | 0.152 | 4  | No |
| <b>TR_SM_R</b>   | -0.14 | -0.27 | 0.00  | -1.93 | 0.027 | 0.175 | 7  | No |
| <b>TR_aud_L</b>  | -0.15 | -0.29 | -0.01 | -2.12 | 0.018 | 0.160 | 5  | No |
| <b>TR_aud_R</b>  | -0.17 | -0.31 | -0.03 | -2.44 | 0.008 | 0.176 | 2  | No |
| <b>TR_opt_L</b>  | -0.04 | -0.17 | 0.10  | -0.53 | 0.300 | 0.374 | 36 | No |
| <b>TR_opt_R</b>  | -0.01 | -0.15 | 0.12  | -0.21 | 0.418 | 0.448 | 42 | No |
| <b>CST_L</b>     | -0.06 | -0.20 | 0.08  | -0.84 | 0.201 | 0.363 | 25 | No |
| <b>CST_R</b>     | -0.04 | -0.18 | 0.09  | -0.62 | 0.268 | 0.366 | 33 | No |
| <b>CC_PFC</b>    | -0.06 | -0.20 | 0.08  | -0.88 | 0.191 | 0.358 | 24 | No |
| <b>CC_SM</b>     | -0.08 | -0.22 | 0.05  | -1.19 | 0.118 | 0.312 | 17 | No |
| <b>CC_pariet</b> | 0.05  | -0.09 | 0.18  | 0.67  | 0.252 | 0.377 | 30 | No |
| <b>CC_temp</b>   | -0.13 | -0.27 | 0.01  | -1.84 | 0.034 | 0.169 | 9  | No |
| <b>CC_splen</b>  | -0.04 | -0.18 | 0.09  | -0.64 | 0.263 | 0.382 | 31 | No |

### Result S3-2: Mean deviation effect size of women and girls with ADHD

The effect size of mean deviation of women and girls with ADHD, lower and upper bound of the confidence interval. The t-statistics, p value, and adjusted p-value by Benjamini correction (FDR  $q=0.05$ ), the rank of p-value and whether the tract is significant after multiple corrections.

|          | ES    | CI_low | CI_up | t     | p      | p_adj | rank | Significance |
|----------|-------|--------|-------|-------|--------|-------|------|--------------|
| AF_L     | -0.34 | -0.58  | -0.11 | -2.94 | 0.002  | 0.010 | 10   | Yes          |
| AF_R     | -0.24 | -0.47  | -0.01 | -2.06 | 0.022  | 0.041 | 24   | Yes          |
| SLF1_L   | -0.11 | -0.34  | 0.12  | -0.95 | 0.173  | 0.222 | 35   | No           |
| SLF1_R   | -0.22 | -0.45  | 0.01  | -1.90 | 0.031  | 0.053 | 26   | No           |
| SLF2_L   | -0.38 | -0.61  | -0.14 | -3.23 | 0.001  | 0.006 | 7    | Yes          |
| SLF2_R   | -0.28 | -0.51  | -0.05 | -2.40 | 0.010  | 0.025 | 17   | Yes          |
| SLF3_L   | -0.41 | -0.65  | -0.17 | -3.54 | <0.001 | 0.003 | 5    | Yes          |
| SLF3_R   | -0.11 | -0.34  | 0.12  | -0.95 | 0.172  | 0.227 | 34   | No           |
| FAT_L    | -0.21 | -0.44  | 0.02  | -1.81 | 0.037  | 0.062 | 27   | No           |
| FAT_R    | -0.13 | -0.36  | 0.10  | -1.10 | 0.138  | 0.200 | 31   | No           |
| PF_L     | -0.12 | -0.35  | 0.11  | -1.01 | 0.159  | 0.217 | 33   | No           |
| PF_R     | 0.04  | -0.19  | 0.26  | 0.30  | 0.381  | 0.408 | 42   | No           |
| CGB_L    | -0.45 | -0.69  | -0.22 | -3.91 | <0.001 | 0.002 | 2    | Yes          |
| CGB_R    | -0.26 | -0.49  | -0.03 | -2.24 | 0.014  | 0.030 | 21   | Yes          |
| CGH_L    | -0.12 | -0.35  | 0.11  | -1.03 | 0.153  | 0.215 | 32   | No           |
| CGH_R    | -0.25 | -0.48  | -0.02 | -2.14 | 0.018  | 0.037 | 22   | Yes          |
| FX_L     | -0.30 | -0.53  | -0.06 | -2.54 | 0.007  | 0.021 | 14   | Yes          |
| FX_R     | -0.02 | -0.25  | 0.21  | -0.18 | 0.429  | 0.439 | 44   | No           |
| ST_L     | 0.04  | -0.18  | 0.27  | 0.37  | 0.355  | 0.400 | 40   | No           |
| ST_R     | 0.05  | -0.18  | 0.28  | 0.41  | 0.340  | 0.392 | 39   | No           |
| UF_L     | -0.28 | -0.51  | -0.05 | -2.43 | 0.009  | 0.027 | 15   | Yes          |
| UF_R     | -0.24 | -0.47  | -0.01 | -2.05 | 0.022  | 0.039 | 25   | Yes          |
| IFOF_L   | -0.33 | -0.56  | -0.09 | -2.81 | 0.003  | 0.013 | 11   | Yes          |
| IFOF_R   | -0.37 | -0.61  | -0.13 | -3.18 | 0.001  | 0.006 | 8    | Yes          |
| ILF_L    | 0.00  | -0.22  | 0.23  | 0.03  | 0.487  | 0.487 | 45   | No           |
| ILF_R    | 0.02  | -0.21  | 0.25  | 0.18  | 0.429  | 0.449 | 43   | No           |
| FS_PFC_L | -0.41 | -0.65  | -0.18 | -3.55 | <0.001 | 0.004 | 4    | Yes          |
| FS_PFC_R | -0.40 | -0.64  | -0.16 | -3.44 | <0.001 | 0.004 | 6    | Yes          |
| FS_M_L   | -0.26 | -0.49  | -0.03 | -2.26 | 0.013  | 0.030 | 20   | Yes          |

|                  |       |       |       |       |        |       |    |     |
|------------------|-------|-------|-------|-------|--------|-------|----|-----|
| <b>FS_M_R</b>    | -0.28 | -0.51 | -0.05 | -2.39 | 0.010  | 0.024 | 18 | Yes |
| <b>TR_PFC_L</b>  | -0.37 | -0.60 | -0.13 | -3.15 | 0.001  | 0.006 | 9  | Yes |
| <b>TR_PFC_R</b>  | -0.31 | -0.54 | -0.07 | -2.63 | 0.005  | 0.018 | 13 | Yes |
| <b>TR_SM_L</b>   | -0.10 | -0.33 | 0.13  | -0.85 | 0.200  | 0.250 | 36 | No  |
| <b>TR_SM_R</b>   | 0.05  | -0.18 | 0.28  | 0.43  | 0.335  | 0.397 | 38 | No  |
| <b>TR_aud_L</b>  | -0.21 | -0.44 | 0.02  | -1.77 | 0.040  | 0.065 | 28 | No  |
| <b>TR_aud_R</b>  | -0.25 | -0.48 | -0.01 | -2.11 | 0.019  | 0.037 | 23 | Yes |
| <b>TR_opt_L</b>  | -0.08 | -0.31 | 0.14  | -0.73 | 0.235  | 0.285 | 37 | No  |
| <b>TR_opt_R</b>  | -0.04 | -0.27 | 0.19  | -0.33 | 0.372  | 0.408 | 41 | No  |
| <b>CST_L</b>     | -0.19 | -0.42 | 0.04  | -1.65 | 0.052  | 0.081 | 29 | No  |
| <b>CST_R</b>     | -0.14 | -0.37 | 0.08  | -1.24 | 0.109  | 0.163 | 30 | No  |
| <b>CC_PFC</b>    | -0.44 | -0.68 | -0.20 | -3.80 | <0.001 | 0.002 | 3  | Yes |
| <b>CC_SM</b>     | -0.26 | -0.49 | -0.03 | -2.26 | 0.013  | 0.031 | 19 | Yes |
| <b>CC_pariet</b> | -0.31 | -0.54 | -0.07 | -2.64 | 0.005  | 0.019 | 12 | Yes |
| <b>CC_temp</b>   | -0.28 | -0.51 | -0.05 | -2.42 | 0.009  | 0.025 | 16 | Yes |
| <b>CC_splen</b>  | -0.46 | -0.70 | -0.22 | -3.96 | <0.001 | 0.004 | 1  | Yes |

### Result S3-3: Mean deviation effect size of male siblings of people with ADHD

Effect size of mean deviation of male siblings of people with ADHD, lower and upper bound of the confidence interval. The t-statistics, p-value, and adjusted p-value by Benjamini correction (FDR  $q=0.05$ ), the rank of p-value and whether the tract is significant after multiple corrections.

|          | ES    | CI_low | CI_up | t     | p     | p_adj | rank | Significance |
|----------|-------|--------|-------|-------|-------|-------|------|--------------|
| AF_L     | 0.24  | -0.03  | 0.51  | 1.80  | 0.039 | 0.434 | 4    | No           |
| AF_R     | 0.15  | -0.11  | 0.42  | 1.14  | 0.130 | 0.586 | 10   | No           |
| SLF1_L   | 0.13  | -0.13  | 0.40  | 1.00  | 0.161 | 0.556 | 13   | No           |
| SLF1_R   | 0.02  | -0.24  | 0.28  | 0.17  | 0.434 | 0.488 | 40   | No           |
| SLF2_L   | 0.14  | -0.12  | 0.40  | 1.04  | 0.152 | 0.571 | 12   | No           |
| SLF2_R   | 0.22  | -0.04  | 0.49  | 1.66  | 0.052 | 0.332 | 7    | No           |
| SLF3_L   | 0.13  | -0.13  | 0.39  | 0.98  | 0.165 | 0.531 | 14   | No           |
| SLF3_R   | -0.02 | -0.28  | 0.24  | -0.16 | 0.439 | 0.481 | 41   | No           |
| FAT_L    | 0.09  | -0.17  | 0.35  | 0.66  | 0.254 | 0.603 | 19   | No           |
| FAT_R    | -0.25 | -0.51  | 0.02  | -1.85 | 0.035 | 0.526 | 3    | No           |
| PF_L     | -0.06 | -0.32  | 0.20  | -0.44 | 0.332 | 0.554 | 27   | No           |
| PF_R     | 0.35  | 0.08   | 0.62  | 2.60  | 0.006 | 0.268 | 1    | No           |
| CGB_L    | -0.13 | -0.39  | 0.14  | -0.95 | 0.174 | 0.522 | 15   | No           |
| CGB_R    | 0.16  | -0.11  | 0.42  | 1.16  | 0.125 | 0.705 | 8    | No           |
| CGH_L    | -0.02 | -0.28  | 0.24  | -0.17 | 0.434 | 0.513 | 38   | No           |
| CGH_R    | 0.06  | -0.20  | 0.33  | 0.47  | 0.320 | 0.554 | 26   | No           |
| FX_L     | 0.01  | -0.26  | 0.27  | 0.04  | 0.483 | 0.483 | 45   | No           |
| FX_R     | -0.07 | -0.34  | 0.19  | -0.56 | 0.289 | 0.566 | 23   | No           |
| ST_L     | 0.04  | -0.22  | 0.30  | 0.30  | 0.382 | 0.506 | 34   | No           |
| ST_R     | 0.09  | -0.17  | 0.35  | 0.65  | 0.258 | 0.580 | 20   | No           |
| UF_L     | 0.10  | -0.17  | 0.36  | 0.72  | 0.239 | 0.632 | 17   | No           |
| UF_R     | 0.01  | -0.26  | 0.27  | 0.04  | 0.482 | 0.493 | 44   | No           |
| IFOF_L   | 0.02  | -0.24  | 0.28  | 0.15  | 0.442 | 0.473 | 42   | No           |
| IFOF_R   | -0.03 | -0.29  | 0.24  | -0.20 | 0.421 | 0.512 | 37   | No           |
| ILF_L    | -0.09 | -0.35  | 0.17  | -0.68 | 0.249 | 0.622 | 18   | No           |
| ILF_R    | -0.03 | -0.30  | 0.23  | -0.25 | 0.402 | 0.502 | 36   | No           |
| FS_PFC_L | 0.07  | -0.20  | 0.33  | 0.49  | 0.314 | 0.588 | 24   | No           |
| FS_PFC_R | -0.06 | -0.32  | 0.21  | -0.43 | 0.335 | 0.539 | 28   | No           |
| FS_M_L   | -0.04 | -0.30  | 0.23  | -0.28 | 0.392 | 0.504 | 35   | No           |

|                  |       |       |      |       |       |       |    |    |
|------------------|-------|-------|------|-------|-------|-------|----|----|
| <b>FS_M_R</b>    | 0.05  | -0.22 | 0.31 | 0.34  | 0.368 | 0.534 | 31 | No |
| <b>TR_PFC_L</b>  | 0.15  | -0.11 | 0.42 | 1.14  | 0.130 | 0.650 | 9  | No |
| <b>TR_PFC_R</b>  | 0.05  | -0.22 | 0.31 | 0.35  | 0.365 | 0.547 | 30 | No |
| <b>TR_SM_L</b>   | -0.23 | -0.49 | 0.04 | -1.71 | 0.047 | 0.420 | 5  | No |
| <b>TR_SM_R</b>   | -0.15 | -0.41 | 0.11 | -1.12 | 0.135 | 0.550 | 11 | No |
| <b>TR_aud_L</b>  | 0.08  | -0.19 | 0.34 | 0.58  | 0.283 | 0.579 | 22 | No |
| <b>TR_aud_R</b>  | 0.04  | -0.22 | 0.31 | 0.32  | 0.374 | 0.510 | 33 | No |
| <b>TR_opt_L</b>  | 0.33  | 0.07  | 0.60 | 2.50  | 0.008 | 0.172 | 2  | No |
| <b>TR_opt_R</b>  | 0.05  | -0.21 | 0.31 | 0.36  | 0.358 | 0.556 | 29 | No |
| <b>CST_L</b>     | 0.06  | -0.20 | 0.33 | 0.48  | 0.317 | 0.570 | 25 | No |
| <b>CST_R</b>     | 0.08  | -0.18 | 0.34 | 0.58  | 0.283 | 0.606 | 21 | No |
| <b>CC_PFC</b>    | -0.04 | -0.31 | 0.22 | -0.33 | 0.371 | 0.521 | 32 | No |
| <b>CC_SM</b>     | -0.12 | -0.38 | 0.15 | -0.87 | 0.194 | 0.546 | 16 | No |
| <b>CC_pariet</b> | 0.23  | -0.04 | 0.49 | 1.70  | 0.047 | 0.354 | 6  | No |
| <b>CC_temp</b>   | 0.02  | -0.24 | 0.28 | 0.17  | 0.434 | 0.500 | 39 | No |
| <b>CC_splen</b>  | 0.02  | -0.24 | 0.28 | 0.13  | 0.447 | 0.468 | 43 | No |

### Result S3-4: Mean deviation effect size of female siblings of people with ADHD

The effect size of the mean deviation of female siblings of people with ADHD, lower and upper bound of the confidence interval. The t-statistics, p-value, and adjusted p-value by Benjamini correction (FDR  $q=0.05$ ), the rank of p-value and whether the tract is significant after multiple corrections.

|          | ES    | CI_low | CI_up | t     | p     | p_adj | rank | Significance |
|----------|-------|--------|-------|-------|-------|-------|------|--------------|
| AF_L     | -0.15 | -0.40  | 0.09  | -1.22 | 0.113 | 0.362 | 14   | No           |
| AF_R     | -0.31 | -0.56  | -0.06 | -2.48 | 0.008 | 0.177 | 2    | No           |
| SLF1_L   | 0.00  | -0.24  | 0.24  | 0.01  | 0.495 | 0.495 | 45   | No           |
| SLF1_R   | 0.09  | -0.15  | 0.34  | 0.76  | 0.225 | 0.506 | 20   | No           |
| SLF2_L   | -0.15 | -0.40  | 0.09  | -1.23 | 0.112 | 0.388 | 13   | No           |
| SLF2_R   | -0.21 | -0.45  | 0.04  | -1.66 | 0.051 | 0.326 | 7    | No           |
| SLF3_L   | -0.16 | -0.40  | 0.09  | -1.26 | 0.106 | 0.433 | 11   | No           |
| SLF3_R   | -0.06 | -0.30  | 0.19  | -0.47 | 0.321 | 0.498 | 29   | No           |
| FAT_L    | 0.19  | -0.05  | 0.44  | 1.55  | 0.063 | 0.352 | 8    | No           |
| FAT_R    | 0.09  | -0.15  | 0.33  | 0.72  | 0.237 | 0.484 | 22   | No           |
| PF_L     | 0.01  | -0.23  | 0.25  | 0.08  | 0.467 | 0.478 | 44   | No           |
| PF_R     | 0.07  | -0.18  | 0.31  | 0.54  | 0.296 | 0.513 | 26   | No           |
| CGB_L    | -0.14 | -0.38  | 0.11  | -1.10 | 0.137 | 0.412 | 15   | No           |
| CGB_R    | 0.03  | -0.21  | 0.27  | 0.25  | 0.400 | 0.473 | 38   | No           |
| CGH_L    | 0.03  | -0.22  | 0.27  | 0.22  | 0.412 | 0.463 | 40   | No           |
| CGH_R    | 0.11  | -0.13  | 0.36  | 0.90  | 0.186 | 0.493 | 17   | No           |
| FX_L     | -0.22 | -0.47  | 0.03  | -1.78 | 0.040 | 0.358 | 5    | No           |
| FX_R     | 0.04  | -0.21  | 0.28  | 0.30  | 0.383 | 0.478 | 36   | No           |
| ST_L     | 0.18  | -0.07  | 0.42  | 1.43  | 0.079 | 0.357 | 10   | No           |
| ST_R     | 0.04  | -0.20  | 0.28  | 0.31  | 0.377 | 0.485 | 35   | No           |
| UF_L     | 0.06  | -0.19  | 0.30  | 0.45  | 0.325 | 0.472 | 31   | No           |
| UF_R     | -0.07 | -0.32  | 0.17  | -0.59 | 0.279 | 0.523 | 24   | No           |
| IFOF_L   | 0.08  | -0.16  | 0.32  | 0.66  | 0.257 | 0.503 | 23   | No           |
| IFOF_R   | -0.22 | -0.47  | 0.02  | -1.81 | 0.038 | 0.426 | 4    | No           |
| ILF_L    | 0.28  | 0.03   | 0.52  | 2.23  | 0.015 | 0.221 | 3    | No           |
| ILF_R    | 0.32  | 0.07   | 0.57  | 2.62  | 0.006 | 0.250 | 1    | No           |
| FS_PFC_L | -0.06 | -0.30  | 0.19  | -0.45 | 0.328 | 0.461 | 32   | No           |
| FS_PFC_R | -0.02 | -0.26  | 0.22  | -0.18 | 0.431 | 0.473 | 41   | No           |

|                  |       |       |      |       |       |       |    |    |
|------------------|-------|-------|------|-------|-------|-------|----|----|
| <b>FS_M_L</b>    | -0.18 | -0.42 | 0.07 | -1.43 | 0.079 | 0.394 | 9  | No |
| <b>FS_M_R</b>    | -0.07 | -0.31 | 0.17 | -0.58 | 0.283 | 0.509 | 25 | No |
| <b>TR_PFC_L</b>  | 0.13  | -0.12 | 0.37 | 1.01  | 0.158 | 0.445 | 16 | No |
| <b>TR_PFC_R</b>  | 0.07  | -0.18 | 0.31 | 0.53  | 0.300 | 0.500 | 27 | No |
| <b>TR_SM_L</b>   | 0.06  | -0.19 | 0.30 | 0.47  | 0.321 | 0.515 | 28 | No |
| <b>TR_SM_R</b>   | 0.03  | -0.21 | 0.27 | 0.24  | 0.407 | 0.470 | 39 | No |
| <b>TR_aud_L</b>  | 0.09  | -0.15 | 0.33 | 0.73  | 0.233 | 0.498 | 21 | No |
| <b>TR_aud_R</b>  | -0.04 | -0.28 | 0.21 | -0.30 | 0.384 | 0.467 | 37 | No |
| <b>TR_opt_L</b>  | 0.01  | -0.23 | 0.25 | 0.09  | 0.466 | 0.488 | 43 | No |
| <b>TR_opt_R</b>  | -0.10 | -0.34 | 0.14 | -0.80 | 0.213 | 0.505 | 19 | No |
| <b>CST_L</b>     | 0.10  | -0.14 | 0.35 | 0.84  | 0.201 | 0.503 | 18 | No |
| <b>CST_R</b>     | 0.21  | -0.04 | 0.46 | 1.69  | 0.047 | 0.356 | 6  | No |
| <b>CC_PFC</b>    | -0.15 | -0.40 | 0.09 | -1.23 | 0.112 | 0.420 | 12 | No |
| <b>CC_SM</b>     | 0.04  | -0.20 | 0.28 | 0.33  | 0.369 | 0.489 | 34 | No |
| <b>CC_pariet</b> | 0.06  | -0.19 | 0.30 | 0.46  | 0.324 | 0.486 | 30 | No |
| <b>CC_temp</b>   | 0.05  | -0.20 | 0.29 | 0.37  | 0.358 | 0.488 | 33 | No |
| <b>CC_splen</b>  | -0.01 | -0.26 | 0.23 | -0.10 | 0.462 | 0.495 | 42 | No |



### Result S3-5: Mean deviation effect size of men and boys with ASD

The effect size of the mean deviation of men and boys with ASD, lower and upper bound of the confidence interval. The t-statistics, p-value, and adjusted p-value by Benjamini correction (FDR  $q=0.05$ ), the rank of p-value and whether the tract is significant after multiple corrections.

|          | ES    | CI_low | CI_up | t     | pvalue | p_corrected | rank | Significance |
|----------|-------|--------|-------|-------|--------|-------------|------|--------------|
| AF_L     | -0.34 | -0.50  | -0.18 | -4.30 | <0.001 | <0.001      | 3    | Yes          |
| AF_R     | -0.22 | -0.38  | -0.06 | -2.75 | 0.003  | 0.008       | 18   | Yes          |
| SLF1_L   | -0.01 | -0.17  | 0.15  | -0.12 | 0.454  | 0.475       | 43   | No           |
| SLF1_R   | 0.00  | -0.16  | 0.15  | -0.04 | 0.483  | 0.494       | 44   | No           |
| SLF2_L   | -0.23 | -0.39  | -0.07 | -2.92 | 0.002  | 0.006       | 14   | Yes          |
| SLF2_R   | -0.23 | -0.38  | -0.07 | -2.83 | 0.003  | 0.008       | 15   | Yes          |
| SLF3_L   | -0.21 | -0.36  | -0.05 | -2.59 | 0.005  | 0.013       | 19   | Yes          |
| SLF3_R   | -0.26 | -0.42  | -0.10 | -3.29 | 0.001  | 0.004       | 7    | Yes          |
| FAT_L    | -0.26 | -0.42  | -0.10 | -3.26 | 0.001  | 0.004       | 8    | Yes          |
| FAT_R    | -0.19 | -0.35  | -0.04 | -2.43 | 0.008  | 0.017       | 21   | Yes          |
| PF_L     | -0.31 | -0.47  | -0.15 | -3.86 | 0.000  | 0.001       | 5    | Yes          |
| PF_R     | -0.07 | -0.23  | 0.08  | -0.93 | 0.177  | 0.242       | 33   | No           |
| CGB_L    | -0.40 | -0.56  | -0.24 | -5.03 | <0.001 | <0.001      | 2    | Yes          |
| CGB_R    | -0.18 | -0.34  | -0.02 | -2.28 | 0.012  | 0.022       | 24   | Yes          |
| CGH_L    | -0.10 | -0.25  | 0.06  | -1.20 | 0.115  | 0.173       | 30   | No           |
| CGH_R    | -0.16 | -0.32  | -0.01 | -2.07 | 0.020  | 0.033       | 27   | Yes          |
| FX_L     | -0.18 | -0.34  | -0.02 | -2.28 | 0.012  | 0.022       | 25   | Yes          |
| FX_R     | -0.17 | -0.33  | -0.01 | -2.15 | 0.016  | 0.028       | 26   | Yes          |
| ST_L     | -0.07 | -0.22  | 0.09  | -0.86 | 0.197  | 0.261       | 34   | No           |
| ST_R     | 0.00  | -0.15  | 0.16  | 0.02  | 0.490  | 0.490       | 45   | No           |
| UF_L     | -0.34 | -0.50  | -0.18 | -4.29 | <0.001 | <0.001      | 4    | Yes          |
| UF_R     | -0.26 | -0.42  | -0.10 | -3.26 | 0.001  | 0.003       | 9    | Yes          |
| IFOF_L   | -0.27 | -0.43  | -0.11 | -3.38 | <0.001 | 0.003       | 6    | Yes          |
| IFOF_R   | -0.24 | -0.40  | -0.08 | -3.02 | 0.001  | 0.005       | 13   | Yes          |
| ILF_L    | -0.02 | -0.18  | 0.14  | -0.25 | 0.401  | 0.429       | 42   | No           |
| ILF_R    | -0.03 | -0.18  | 0.13  | -0.36 | 0.359  | 0.404       | 40   | No           |
| FS_PFC_L | -0.26 | -0.42  | -0.10 | -3.25 | 0.001  | 0.003       | 10   | Yes          |
| FS_PFC_R | -0.22 | -0.38  | -0.07 | -2.81 | 0.003  | 0.008       | 16   | Yes          |
| FS_M_L   | -0.05 | -0.20  | 0.11  | -0.58 | 0.282  | 0.352       | 36   | No           |

|                  |       |       |       |       |        |        |    |     |
|------------------|-------|-------|-------|-------|--------|--------|----|-----|
| <b>FS_M_R</b>    | -0.13 | -0.28 | 0.03  | -1.61 | 0.055  | 0.088  | 28 | No  |
| <b>TR_PFC_L</b>  | -0.22 | -0.38 | -0.06 | -2.78 | 0.003  | 0.008  | 17 | Yes |
| <b>TR_PFC_R</b>  | -0.21 | -0.36 | -0.05 | -2.59 | 0.005  | 0.012  | 20 | Yes |
| <b>TR_SM_L</b>   | -0.09 | -0.24 | 0.07  | -1.11 | 0.135  | 0.195  | 31 | No  |
| <b>TR_SM_R</b>   | -0.03 | -0.19 | 0.12  | -0.39 | 0.347  | 0.400  | 39 | No  |
| <b>TR_aud_L</b>  | -0.24 | -0.40 | -0.08 | -3.05 | 0.001  | 0.005  | 12 | Yes |
| <b>TR_aud_R</b>  | -0.19 | -0.35 | -0.03 | -2.41 | 0.009  | 0.018  | 22 | Yes |
| <b>TR_opt_L</b>  | -0.04 | -0.19 | 0.12  | -0.47 | 0.320  | 0.379  | 38 | No  |
| <b>TR_opt_R</b>  | -0.04 | -0.20 | 0.11  | -0.53 | 0.297  | 0.361  | 37 | No  |
| <b>CST_L</b>     | 0.05  | -0.11 | 0.20  | 0.58  | 0.280  | 0.360  | 35 | No  |
| <b>CST_R</b>     | 0.08  | -0.07 | 0.24  | 1.07  | 0.144  | 0.203  | 32 | No  |
| <b>CC_PFC</b>    | -0.50 | -0.66 | -0.33 | -6.23 | <0.001 | <0.001 | 1  | Yes |
| <b>CC_SM</b>     | -0.18 | -0.34 | -0.03 | -2.31 | 0.011  | 0.022  | 23 | Yes |
| <b>CC_pariet</b> | -0.03 | -0.18 | 0.13  | -0.32 | 0.374  | 0.411  | 41 | No  |
| <b>CC_temp</b>   | -0.25 | -0.41 | -0.09 | -3.16 | 0.001  | 0.004  | 11 | Yes |
| <b>CC_splen</b>  | -0.10 | -0.25 | 0.06  | -1.23 | 0.111  | 0.172  | 29 | No  |

### Result S3-6: Mean deviation effect size of women and girls with ASD

The effect size of the mean deviation of women and girls with ASD, lower and upper bound of the confidence interval. The t-statistics, p-value, and adjusted p-value by Benjamini correction (FDR  $q=0.05$ ), the rank of p-value and whether the tract is significant after multiple corrections.

|          | ES    | CI_low | CI_up | t     | p     | p_adj | rank | Significance |
|----------|-------|--------|-------|-------|-------|-------|------|--------------|
| AF_L     | -0.26 | -0.74  | 0.23  | -1.05 | 0.154 | 1.000 | 6    | No           |
| AF_R     | -0.30 | -0.79  | 0.18  | -1.24 | 0.116 | 1.000 | 4    | No           |
| SLF1_L   | -0.23 | -0.71  | 0.26  | -0.93 | 0.182 | 0.912 | 9    | No           |
| SLF1_R   | -0.04 | -0.52  | 0.43  | -0.17 | 0.433 | 0.573 | 34   | No           |
| SLF2_L   | -0.08 | -0.56  | 0.39  | -0.34 | 0.368 | 0.637 | 26   | No           |
| SLF2_R   | -0.19 | -0.67  | 0.29  | -0.78 | 0.225 | 0.778 | 13   | No           |
| SLF3_L   | 0.00  | -0.47  | 0.48  | 0.02  | 0.493 | 0.493 | 45   | No           |
| SLF3_R   | -0.07 | -0.55  | 0.41  | -0.28 | 0.390 | 0.585 | 30   | No           |
| FAT_L    | -0.26 | -0.74  | 0.23  | -1.06 | 0.152 | 1.000 | 5    | No           |
| FAT_R    | 0.19  | -0.29  | 0.67  | 0.79  | 0.220 | 0.991 | 10   | No           |
| PF_L     | 0.08  | -0.40  | 0.55  | 0.31  | 0.379 | 0.610 | 28   | No           |
| PF_R     | 0.15  | -0.32  | 0.63  | 0.64  | 0.267 | 0.751 | 16   | No           |
| CGB_L    | 0.14  | -0.34  | 0.62  | 0.59  | 0.282 | 0.748 | 17   | No           |
| CGB_R    | -0.04 | -0.51  | 0.44  | -0.16 | 0.438 | 0.563 | 35   | No           |
| CGH_L    | -0.03 | -0.51  | 0.44  | -0.14 | 0.445 | 0.541 | 37   | No           |
| CGH_R    | -0.19 | -0.67  | 0.29  | -0.78 | 0.224 | 0.839 | 12   | No           |
| FX_L     | 0.04  | -0.44  | 0.51  | 0.15  | 0.440 | 0.550 | 36   | No           |
| FX_R     | -0.01 | -0.49  | 0.46  | -0.05 | 0.482 | 0.504 | 43   | No           |
| ST_L     | -0.16 | -0.63  | 0.32  | -0.64 | 0.266 | 0.797 | 15   | No           |
| ST_R     | 0.16  | -0.32  | 0.64  | 0.65  | 0.261 | 0.840 | 14   | No           |
| UF_L     | -0.06 | -0.54  | 0.41  | -0.27 | 0.397 | 0.576 | 31   | No           |
| UF_R     | -0.26 | -0.74  | 0.23  | -1.05 | 0.154 | 0.990 | 7    | No           |
| IFOF_L   | -0.02 | -0.50  | 0.45  | -0.10 | 0.461 | 0.531 | 39   | No           |
| IFOF_R   | -0.05 | -0.53  | 0.42  | -0.21 | 0.418 | 0.570 | 33   | No           |
| ILF_L    | -0.10 | -0.57  | 0.38  | -0.40 | 0.346 | 0.650 | 24   | No           |
| ILF_R    | -0.12 | -0.60  | 0.35  | -0.52 | 0.307 | 0.690 | 20   | No           |
| FS_PFC_L | -0.13 | -0.61  | 0.35  | -0.54 | 0.300 | 0.710 | 19   | No           |
| FS_PFC_R | -0.08 | -0.56  | 0.40  | -0.33 | 0.374 | 0.623 | 27   | No           |
| FS_M_L   | -0.03 | -0.51  | 0.44  | -0.13 | 0.448 | 0.531 | 38   | No           |

|                  |       |       |      |       |       |       |    |    |
|------------------|-------|-------|------|-------|-------|-------|----|----|
| <b>FS_M_R</b>    | 0.45  | -0.05 | 0.95 | 1.84  | 0.042 | 1.000 | 1  | No |
| <b>TR_PFC_L</b>  | -0.02 | -0.50 | 0.45 | -0.10 | 0.462 | 0.520 | 40 | No |
| <b>TR_PFC_R</b>  | -0.01 | -0.49 | 0.46 | -0.06 | 0.478 | 0.512 | 42 | No |
| <b>TR_SM_L</b>   | 0.07  | -0.40 | 0.55 | 0.30  | 0.386 | 0.598 | 29 | No |
| <b>TR_SM_R</b>   | 0.06  | -0.42 | 0.53 | 0.23  | 0.409 | 0.575 | 32 | No |
| <b>TR_aud_L</b>  | -0.14 | -0.61 | 0.34 | -0.56 | 0.292 | 0.730 | 18 | No |
| <b>TR_aud_R</b>  | -0.09 | -0.56 | 0.39 | -0.36 | 0.363 | 0.654 | 25 | No |
| <b>TR_opt_L</b>  | 0.11  | -0.37 | 0.58 | 0.44  | 0.334 | 0.654 | 23 | No |
| <b>TR_opt_R</b>  | 0.12  | -0.35 | 0.60 | 0.51  | 0.308 | 0.659 | 21 | No |
| <b>CST_L</b>     | 0.19  | -0.29 | 0.67 | 0.78  | 0.223 | 0.913 | 11 | No |
| <b>CST_R</b>     | 0.32  | -0.16 | 0.81 | 1.34  | 0.100 | 1.000 | 3  | No |
| <b>CC_PFC</b>    | -0.23 | -0.71 | 0.25 | -0.94 | 0.182 | 1.000 | 8  | No |
| <b>CC_SM</b>     | 0.02  | -0.46 | 0.49 | 0.07  | 0.471 | 0.517 | 41 | No |
| <b>CC_pariet</b> | -0.41 | -0.90 | 0.09 | -1.68 | 0.056 | 1.000 | 2  | No |
| <b>CC_temp</b>   | -0.01 | -0.48 | 0.47 | -0.03 | 0.490 | 0.501 | 44 | No |
| <b>CC_splen</b>  | 0.11  | -0.37 | 0.59 | 0.46  | 0.327 | 0.668 | 22 | No |

### Result S3-7: Mean deviation effect size of male siblings of people with ASD

The effect size of the mean deviation of male siblings of people with ASD, lower and upper bound of the confidence interval. The t-statistics, p-value, and adjusted p-value by Benjamini correction (FDR  $q=0.05$ ), the rank of p-value and whether the tract is significant after multiple corrections.

|          | ES    | CI_low | CI_up | t     | p     | p_adj | rank | Significance |
|----------|-------|--------|-------|-------|-------|-------|------|--------------|
| AF_L     | 0.15  | -0.17  | 0.47  | 0.94  | 0.177 | 0.379 | 21   | No           |
| AF_R     | 0.18  | -0.14  | 0.50  | 1.13  | 0.133 | 0.353 | 17   | No           |
| SLF1_L   | 0.04  | -0.28  | 0.36  | 0.25  | 0.403 | 0.503 | 36   | No           |
| SLF1_R   | -0.15 | -0.46  | 0.17  | -0.90 | 0.188 | 0.368 | 23   | No           |
| SLF2_L   | -0.08 | -0.39  | 0.24  | -0.46 | 0.323 | 0.469 | 31   | No           |
| SLF2_R   | -0.31 | -0.64  | 0.02  | -1.91 | 0.032 | 0.179 | 8    | No           |
| SLF3_L   | -0.02 | -0.33  | 0.30  | -0.09 | 0.463 | 0.521 | 40   | No           |
| SLF3_R   | -0.10 | -0.42  | 0.22  | -0.62 | 0.271 | 0.452 | 27   | No           |
| FAT_L    | -0.42 | -0.75  | -0.08 | -2.56 | 0.007 | 0.110 | 3    | No           |
| FAT_R    | -0.31 | -0.63  | 0.02  | -1.88 | 0.034 | 0.169 | 9    | No           |
| PF_L     | 0.00  | -0.32  | 0.32  | 0.01  | 0.497 | 0.497 | 45   | No           |
| PF_R     | -0.13 | -0.45  | 0.19  | -0.80 | 0.214 | 0.402 | 24   | No           |
| CGB_L    | -0.20 | -0.52  | 0.12  | -1.23 | 0.113 | 0.317 | 16   | No           |
| CGB_R    | -0.18 | -0.50  | 0.14  | -1.09 | 0.141 | 0.352 | 18   | No           |
| CGH_L    | 0.01  | -0.31  | 0.33  | 0.08  | 0.470 | 0.491 | 43   | No           |
| CGH_R    | 0.07  | -0.25  | 0.38  | 0.41  | 0.342 | 0.481 | 32   | No           |
| FX_L     | -0.05 | -0.37  | 0.27  | -0.31 | 0.380 | 0.489 | 35   | No           |
| FX_R     | -0.03 | -0.35  | 0.28  | -0.21 | 0.419 | 0.496 | 38   | No           |
| ST_L     | 0.01  | -0.30  | 0.33  | 0.08  | 0.467 | 0.500 | 42   | No           |
| ST_R     | -0.04 | -0.36  | 0.28  | -0.24 | 0.407 | 0.495 | 37   | No           |
| UF_L     | -0.09 | -0.41  | 0.23  | -0.56 | 0.289 | 0.434 | 30   | No           |
| UF_R     | -0.10 | -0.41  | 0.22  | -0.59 | 0.281 | 0.436 | 29   | No           |
| IFOF_L   | -0.05 | -0.37  | 0.26  | -0.34 | 0.369 | 0.488 | 34   | No           |
| IFOF_R   | -0.27 | -0.59  | 0.05  | -1.66 | 0.053 | 0.238 | 10   | No           |
| ILF_L    | -0.26 | -0.59  | 0.06  | -1.62 | 0.057 | 0.232 | 11   | No           |
| ILF_R    | -0.15 | -0.47  | 0.17  | -0.91 | 0.184 | 0.377 | 22   | No           |
| FS_PFC_L | -0.37 | -0.70  | -0.04 | -2.29 | 0.014 | 0.157 | 4    | No           |
| FS_PFC_R | -0.45 | -0.78  | -0.11 | -2.75 | 0.005 | 0.103 | 2    | No           |

|                  |       |       |       |       |       |       |    |     |
|------------------|-------|-------|-------|-------|-------|-------|----|-----|
| <b>FS_M_L</b>    | 0.10  | -0.22 | 0.41  | 0.59  | 0.278 | 0.447 | 28 | No  |
| <b>FS_M_R</b>    | 0.06  | -0.26 | 0.38  | 0.39  | 0.351 | 0.479 | 33 | No  |
| <b>TR_PFC_L</b>  | -0.32 | -0.64 | 0.01  | -1.96 | 0.029 | 0.184 | 7  | No  |
| <b>TR_PFC_R</b>  | -0.36 | -0.69 | -0.04 | -2.24 | 0.016 | 0.140 | 5  | No  |
| <b>TR_SM_L</b>   | -0.26 | -0.58 | 0.07  | -1.58 | 0.061 | 0.230 | 12 | No  |
| <b>TR_SM_R</b>   | 0.02  | -0.30 | 0.34  | 0.13  | 0.449 | 0.518 | 39 | No  |
| <b>TR_aud_L</b>  | -0.13 | -0.45 | 0.19  | -0.78 | 0.220 | 0.395 | 25 | No  |
| <b>TR_aud_R</b>  | 0.21  | -0.11 | 0.53  | 1.29  | 0.103 | 0.330 | 14 | No  |
| <b>TR_opt_L</b>  | 0.20  | -0.12 | 0.52  | 1.24  | 0.112 | 0.335 | 15 | No  |
| <b>TR_opt_R</b>  | 0.16  | -0.16 | 0.48  | 0.96  | 0.172 | 0.388 | 20 | No  |
| <b>CST_L</b>     | 0.11  | -0.21 | 0.43  | 0.68  | 0.251 | 0.434 | 26 | No  |
| <b>CST_R</b>     | 0.34  | 0.01  | 0.67  | 2.10  | 0.022 | 0.161 | 6  | No  |
| <b>CC_PFC</b>    | -0.55 | -0.89 | -0.21 | -3.41 | 0.001 | 0.036 | 1  | Yes |
| <b>CC_SM</b>     | -0.01 | -0.33 | 0.30  | -0.09 | 0.466 | 0.512 | 41 | No  |
| <b>CC_pariet</b> | 0.23  | -0.09 | 0.56  | 1.45  | 0.078 | 0.271 | 13 | No  |
| <b>CC_temp</b>   | -0.17 | -0.49 | 0.15  | -1.04 | 0.153 | 0.362 | 19 | No  |
| <b>CC_splen</b>  | 0.00  | -0.32 | 0.32  | -0.01 | 0.496 | 0.507 | 44 | No  |

### Result S3-8: Mean deviation effect size of female siblings of people with ASD

The effect size of mean deviation of female siblings of people with ASD, lower and upper bound of the confidence interval. The t-statistics, p-value, and adjusted p value by Benjamini correction (FDR  $q=0.05$ ), the rank of p-value and whether the tract is significant after multiple corrections.

|          | ES    | CI_low | CI_up | t     | p     | p_adj | rank | Sig |
|----------|-------|--------|-------|-------|-------|-------|------|-----|
| AF_L     | -0.41 | -0.76  | -0.06 | -2.41 | 0.011 | 0.055 | 9    | No  |
| AF_R     | -0.57 | -0.93  | -0.20 | -3.30 | 0.001 | 0.026 | 2    | Yes |
| SLF1_L   | -0.31 | -0.66  | 0.03  | -1.83 | 0.038 | 0.095 | 18   | No  |
| SLF1_R   | 0.01  | -0.32  | 0.35  | 0.07  | 0.474 | 0.474 | 45   | No  |
| SLF2_L   | -0.57 | -0.93  | -0.20 | -3.30 | 0.001 | 0.052 | 1    | Yes |
| SLF2_R   | -0.53 | -0.89  | -0.18 | -3.12 | 0.002 | 0.021 | 4    | Yes |
| SLF3_L   | -0.54 | -0.90  | -0.18 | -3.17 | 0.002 | 0.025 | 3    | Yes |
| SLF3_R   | -0.30 | -0.65  | 0.04  | -1.77 | 0.043 | 0.096 | 20   | No  |
| FAT_L    | -0.26 | -0.61  | 0.08  | -1.54 | 0.066 | 0.135 | 22   | No  |
| FAT_R    | -0.30 | -0.64  | 0.05  | -1.73 | 0.046 | 0.099 | 21   | No  |
| PF_L     | -0.20 | -0.54  | 0.14  | -1.18 | 0.124 | 0.199 | 28   | No  |
| PF_R     | -0.14 | -0.48  | 0.19  | -0.84 | 0.204 | 0.255 | 36   | No  |
| CGB_L    | -0.45 | -0.81  | -0.10 | -2.65 | 0.006 | 0.040 | 7    | Yes |
| CGB_R    | -0.23 | -0.57  | 0.11  | -1.32 | 0.098 | 0.176 | 25   | No  |
| CGH_L    | -0.52 | -0.88  | -0.16 | -3.04 | 0.002 | 0.021 | 5    | Yes |
| CGH_R    | -0.35 | -0.69  | 0.00  | -2.02 | 0.026 | 0.072 | 16   | No  |
| FX_L     | 0.18  | -0.16  | 0.52  | 1.04  | 0.153 | 0.230 | 30   | No  |
| FX_R     | -0.16 | -0.50  | 0.18  | -0.94 | 0.176 | 0.248 | 32   | No  |
| ST_L     | 0.18  | -0.15  | 0.52  | 1.08  | 0.145 | 0.224 | 29   | No  |
| ST_R     | 0.07  | -0.26  | 0.41  | 0.43  | 0.336 | 0.369 | 41   | No  |
| UF_L     | -0.39 | -0.74  | -0.04 | -2.29 | 0.014 | 0.054 | 12   | No  |
| UF_R     | -0.21 | -0.55  | 0.13  | -1.24 | 0.112 | 0.187 | 27   | No  |
| IFOF_L   | -0.47 | -0.82  | -0.11 | -2.73 | 0.005 | 0.038 | 6    | Yes |
| IFOF_R   | -0.39 | -0.74  | -0.05 | -2.30 | 0.014 | 0.057 | 11   | No  |
| ILF_L    | 0.09  | -0.24  | 0.43  | 0.55  | 0.294 | 0.330 | 40   | No  |
| ILF_R    | 0.25  | -0.09  | 0.59  | 1.46  | 0.077 | 0.150 | 23   | No  |
| FS_PFC_L | -0.40 | -0.75  | -0.05 | -2.35 | 0.012 | 0.055 | 10   | No  |
| FS_PFC_R | -0.36 | -0.71  | -0.01 | -2.09 | 0.022 | 0.066 | 15   | No  |
| FS_M_L   | -0.39 | -0.74  | -0.04 | -2.28 | 0.015 | 0.050 | 13   | No  |

|                  |       |       |       |       |       |       |    |    |
|------------------|-------|-------|-------|-------|-------|-------|----|----|
| <b>FS_M_R</b>    | -0.16 | -0.50 | 0.18  | -0.92 | 0.181 | 0.240 | 34 | No |
| <b>TR_PFC_L</b>  | -0.31 | -0.65 | 0.04  | -1.79 | 0.041 | 0.097 | 19 | No |
| <b>TR_PFC_R</b>  | -0.23 | -0.57 | 0.11  | -1.34 | 0.095 | 0.179 | 24 | No |
| <b>TR_SM_L</b>   | -0.33 | -0.67 | 0.02  | -1.91 | 0.033 | 0.086 | 17 | No |
| <b>TR_SM_R</b>   | -0.11 | -0.45 | 0.23  | -0.64 | 0.263 | 0.304 | 39 | No |
| <b>TR_aud_L</b>  | -0.42 | -0.77 | -0.07 | -2.43 | 0.010 | 0.059 | 8  | No |
| <b>TR_aud_R</b>  | -0.14 | -0.48 | 0.20  | -0.81 | 0.211 | 0.256 | 37 | No |
| <b>TR_opt_L</b>  | -0.21 | -0.55 | 0.13  | -1.24 | 0.112 | 0.194 | 26 | No |
| <b>TR_opt_R</b>  | -0.02 | -0.36 | 0.31  | -0.14 | 0.444 | 0.454 | 44 | No |
| <b>CST_L</b>     | -0.16 | -0.50 | 0.18  | -0.94 | 0.177 | 0.242 | 33 | No |
| <b>CST_R</b>     | -0.14 | -0.47 | 0.20  | -0.80 | 0.216 | 0.256 | 38 | No |
| <b>CC_PFC</b>    | -0.38 | -0.72 | -0.03 | -2.19 | 0.018 | 0.058 | 14 | No |
| <b>CC_SM</b>     | -0.16 | -0.50 | 0.18  | -0.92 | 0.183 | 0.236 | 35 | No |
| <b>CC_pariet</b> | -0.05 | -0.39 | 0.29  | -0.30 | 0.384 | 0.402 | 43 | No |
| <b>CC_temp</b>   | -0.17 | -0.51 | 0.17  | -0.99 | 0.165 | 0.239 | 31 | No |
| <b>CC_splen</b>  | -0.06 | -0.40 | 0.28  | -0.35 | 0.366 | 0.392 | 42 | No |



### Result S3-9: Mean deviation effect size of boys with ADHD

The effect size of the mean deviation of boys with ADHD, lower and upper bound of the confidence interval. The t-statistics, p-value, and adjusted p-value by Benjamini correction (FDR  $q=0.05$ ), the rank of p-value and whether the tract is significant after multiple corrections.

|          | ES    | CI_low | CI_up | t     | p     | p_adj | rank | Significance |
|----------|-------|--------|-------|-------|-------|-------|------|--------------|
| AF_L     | -0.16 | -0.34  | 0.02  | -1.79 | 0.038 | 0.141 | 12   | No           |
| AF_R     | -0.26 | -0.45  | -0.08 | -2.90 | 0.002 | 0.033 | 3    | Yes          |
| SLF1_L   | -0.06 | -0.24  | 0.12  | -0.62 | 0.267 | 0.364 | 33   | No           |
| SLF1_R   | -0.12 | -0.30  | 0.06  | -1.34 | 0.092 | 0.197 | 21   | No           |
| SLF2_L   | -0.08 | -0.26  | 0.09  | -0.93 | 0.178 | 0.276 | 29   | No           |
| SLF2_R   | -0.17 | -0.35  | 0.01  | -1.89 | 0.031 | 0.125 | 11   | No           |
| SLF3_L   | -0.06 | -0.24  | 0.12  | -0.66 | 0.255 | 0.359 | 32   | No           |
| SLF3_R   | -0.21 | -0.39  | -0.03 | -2.29 | 0.012 | 0.108 | 5    | No           |
| FAT_L    | -0.01 | -0.19  | 0.17  | -0.14 | 0.443 | 0.453 | 44   | No           |
| FAT_R    | -0.19 | -0.37  | -0.01 | -2.12 | 0.018 | 0.116 | 7    | No           |
| PF_L     | -0.15 | -0.33  | 0.03  | -1.68 | 0.048 | 0.154 | 14   | No           |
| PF_R     | 0.04  | -0.14  | 0.22  | 0.46  | 0.322 | 0.381 | 38   | No           |
| CGB_L    | -0.28 | -0.46  | -0.10 | -3.07 | 0.001 | 0.059 | 1    | Yes          |
| CGB_R    | 0.06  | -0.12  | 0.24  | 0.66  | 0.254 | 0.369 | 31   | No           |
| CGH_L    | -0.16 | -0.34  | 0.02  | -1.79 | 0.038 | 0.132 | 13   | No           |
| CGH_R    | -0.02 | -0.20  | 0.16  | -0.20 | 0.421 | 0.441 | 43   | No           |
| FX_L     | -0.02 | -0.20  | 0.16  | -0.24 | 0.407 | 0.436 | 42   | No           |
| FX_R     | 0.03  | -0.15  | 0.20  | 0.29  | 0.386 | 0.435 | 40   | No           |
| ST_L     | -0.09 | -0.27  | 0.09  | -1.00 | 0.160 | 0.267 | 27   | No           |
| ST_R     | -0.14 | -0.32  | 0.04  | -1.56 | 0.061 | 0.160 | 17   | No           |
| UF_L     | -0.12 | -0.30  | 0.06  | -1.30 | 0.098 | 0.201 | 22   | No           |
| UF_R     | -0.13 | -0.31  | 0.05  | -1.44 | 0.076 | 0.179 | 19   | No           |
| IFOF_L   | -0.18 | -0.36  | 0.00  | -1.97 | 0.026 | 0.115 | 10   | No           |
| IFOF_R   | -0.11 | -0.29  | 0.07  | -1.20 | 0.116 | 0.217 | 24   | No           |
| ILF_L    | -0.15 | -0.33  | 0.03  | -1.67 | 0.048 | 0.145 | 15   | No           |
| ILF_R    | -0.04 | -0.22  | 0.14  | -0.47 | 0.320 | 0.389 | 37   | No           |
| FS_PFC_L | -0.18 | -0.36  | 0.00  | -2.01 | 0.023 | 0.130 | 8    | No           |
| FS_PFC_R | -0.13 | -0.31  | 0.05  | -1.46 | 0.073 | 0.182 | 18   | No           |
| FS_M_L   | -0.09 | -0.26  | 0.09  | -0.94 | 0.173 | 0.279 | 28   | No           |

|                  |       |       |       |       |       |       |    |     |
|------------------|-------|-------|-------|-------|-------|-------|----|-----|
| <b>FS_M_R</b>    | -0.28 | -0.46 | -0.10 | -3.07 | 0.001 | 0.030 | 2  | Yes |
| <b>TR_PFC_L</b>  | -0.12 | -0.30 | 0.05  | -1.37 | 0.087 | 0.196 | 20 | No  |
| <b>TR_PFC_R</b>  | -0.03 | -0.21 | 0.15  | -0.32 | 0.376 | 0.433 | 39 | No  |
| <b>TR_SM_L</b>   | -0.18 | -0.36 | 0.00  | -1.97 | 0.026 | 0.128 | 9  | No  |
| <b>TR_SM_R</b>   | -0.10 | -0.28 | 0.08  | -1.12 | 0.133 | 0.239 | 25 | No  |
| <b>TR_aud_L</b>  | -0.21 | -0.39 | -0.03 | -2.30 | 0.012 | 0.130 | 4  | No  |
| <b>TR_aud_R</b>  | -0.20 | -0.38 | -0.02 | -2.21 | 0.015 | 0.110 | 6  | No  |
| <b>TR_opt_L</b>  | -0.11 | -0.29 | 0.07  | -1.21 | 0.114 | 0.223 | 23 | No  |
| <b>TR_opt_R</b>  | -0.02 | -0.20 | 0.16  | -0.24 | 0.407 | 0.446 | 41 | No  |
| <b>CST_L</b>     | -0.05 | -0.23 | 0.13  | -0.53 | 0.300 | 0.385 | 35 | No  |
| <b>CST_R</b>     | -0.10 | -0.28 | 0.08  | -1.11 | 0.135 | 0.233 | 26 | No  |
| <b>CC_PFC</b>    | -0.05 | -0.22 | 0.13  | -0.50 | 0.310 | 0.387 | 36 | No  |
| <b>CC_SM</b>     | -0.05 | -0.23 | 0.13  | -0.58 | 0.280 | 0.371 | 34 | No  |
| <b>CC_pariet</b> | 0.00  | -0.18 | 0.18  | 0.00  | 0.499 | 0.499 | 45 | No  |
| <b>CC_temp</b>   | -0.15 | -0.33 | 0.03  | -1.62 | 0.054 | 0.153 | 16 | No  |
| <b>CC_splen</b>  | -0.07 | -0.25 | 0.11  | -0.78 | 0.219 | 0.328 | 30 | No  |

### Result S3-10: Mean deviation effect size of girls with ADHD

The effect size of mean deviation of girls with ADHD, lower and upper bound of the confidence interval. The t-statistics, p-value, and adjusted p-value by Benjamini correction (FDR  $q=0.05$ ), the rank of p-value and whether the tract is significant after multiple corrections.

|          | ES    | CI_low | CI_up | t     | p     | p_adj | rank | Significance |
|----------|-------|--------|-------|-------|-------|-------|------|--------------|
| AF_L     | -0.29 | -0.68  | 0.10  | -1.49 | 0.075 | 0.198 | 17   | No           |
| AF_R     | -0.42 | -0.82  | -0.02 | -2.13 | 0.021 | 0.107 | 9    | No           |
| SLF1_L   | -0.08 | -0.46  | 0.31  | -0.40 | 0.346 | 0.370 | 42   | No           |
| SLF1_R   | -0.01 | -0.39  | 0.37  | -0.05 | 0.480 | 0.480 | 45   | No           |
| SLF2_L   | -0.55 | -0.96  | -0.14 | -2.81 | 0.005 | 0.072 | 3    | No           |
| SLF2_R   | -0.24 | -0.63  | 0.15  | -1.22 | 0.118 | 0.252 | 21   | No           |
| SLF3_L   | -0.52 | -0.93  | -0.11 | -2.67 | 0.007 | 0.059 | 5    | No           |
| SLF3_R   | -0.23 | -0.61  | 0.16  | -1.15 | 0.131 | 0.268 | 22   | No           |
| FAT_L    | -0.07 | -0.46  | 0.31  | -0.38 | 0.355 | 0.372 | 43   | No           |
| FAT_R    | -0.15 | -0.53  | 0.24  | -0.74 | 0.232 | 0.317 | 33   | No           |
| PF_L     | -0.28 | -0.67  | 0.11  | -1.44 | 0.081 | 0.203 | 18   | No           |
| PF_R     | 0.10  | -0.29  | 0.48  | 0.51  | 0.309 | 0.347 | 40   | No           |
| CGB_L    | -0.55 | -0.97  | -0.14 | -2.82 | 0.005 | 0.104 | 2    | No           |
| CGB_R    | -0.42 | -0.82  | -0.02 | -2.14 | 0.021 | 0.119 | 8    | No           |
| CGH_L    | -0.21 | -0.60  | 0.18  | -1.06 | 0.150 | 0.281 | 24   | No           |
| CGH_R    | -0.10 | -0.49  | 0.29  | -0.51 | 0.307 | 0.354 | 39   | No           |
| FX_L     | -0.54 | -0.95  | -0.13 | -2.75 | 0.005 | 0.062 | 4    | No           |
| FX_R     | -0.11 | -0.49  | 0.28  | -0.55 | 0.292 | 0.346 | 38   | No           |
| ST_L     | 0.11  | -0.27  | 0.50  | 0.57  | 0.287 | 0.349 | 37   | No           |
| ST_R     | -0.31 | -0.71  | 0.08  | -1.59 | 0.062 | 0.174 | 16   | No           |
| UF_L     | -0.37 | -0.77  | 0.03  | -1.88 | 0.036 | 0.135 | 12   | No           |
| UF_R     | -0.16 | -0.54  | 0.23  | -0.80 | 0.217 | 0.315 | 31   | No           |
| IFOF_L   | -0.46 | -0.86  | -0.05 | -2.33 | 0.014 | 0.090 | 7    | No           |
| IFOF_R   | -0.56 | -0.98  | -0.15 | -2.88 | 0.004 | 0.182 | 1    | No           |
| ILF_L    | -0.09 | -0.48  | 0.29  | -0.48 | 0.318 | 0.349 | 41   | No           |
| ILF_R    | 0.12  | -0.26  | 0.51  | 0.62  | 0.270 | 0.347 | 35   | No           |
| FS_PFC_L | -0.36 | -0.75  | 0.04  | -1.81 | 0.041 | 0.142 | 13   | No           |
| FS_PFC_R | -0.37 | -0.77  | 0.02  | -1.91 | 0.034 | 0.138 | 11   | No           |
| FS_M_L   | -0.21 | -0.60  | 0.18  | -1.05 | 0.151 | 0.272 | 25   | No           |

|                  |       |       |       |       |       |       |    |    |
|------------------|-------|-------|-------|-------|-------|-------|----|----|
| <b>FS_M_R</b>    | -0.18 | -0.57 | 0.21  | -0.91 | 0.186 | 0.289 | 29 | No |
| <b>TR_PFC_L</b>  | -0.34 | -0.73 | 0.06  | -1.72 | 0.049 | 0.158 | 14 | No |
| <b>TR_PFC_R</b>  | -0.26 | -0.65 | 0.13  | -1.33 | 0.098 | 0.231 | 19 | No |
| <b>TR_SM_L</b>   | -0.16 | -0.54 | 0.23  | -0.81 | 0.214 | 0.321 | 30 | No |
| <b>TR_SM_R</b>   | -0.02 | -0.40 | 0.37  | -0.08 | 0.469 | 0.480 | 44 | No |
| <b>TR_aud_L</b>  | -0.16 | -0.54 | 0.23  | -0.79 | 0.218 | 0.306 | 32 | No |
| <b>TR_aud_R</b>  | -0.20 | -0.59 | 0.19  | -1.04 | 0.155 | 0.268 | 26 | No |
| <b>TR_opt_L</b>  | -0.34 | -0.73 | 0.06  | -1.71 | 0.050 | 0.149 | 15 | No |
| <b>TR_opt_R</b>  | -0.19 | -0.57 | 0.20  | -0.94 | 0.177 | 0.295 | 27 | No |
| <b>CST_L</b>     | -0.12 | -0.51 | 0.27  | -0.61 | 0.273 | 0.341 | 36 | No |
| <b>CST_R</b>     | -0.13 | -0.52 | 0.25  | -0.68 | 0.251 | 0.332 | 34 | No |
| <b>CC_PFC</b>    | -0.18 | -0.57 | 0.20  | -0.93 | 0.180 | 0.289 | 28 | No |
| <b>CC_SM</b>     | -0.26 | -0.65 | 0.13  | -1.33 | 0.098 | 0.221 | 20 | No |
| <b>CC_pariet</b> | -0.39 | -0.79 | 0.01  | -1.98 | 0.029 | 0.132 | 10 | No |
| <b>CC_temp</b>   | -0.22 | -0.61 | 0.17  | -1.12 | 0.137 | 0.268 | 23 | No |
| <b>CC_splen</b>  | -0.51 | -0.92 | -0.10 | -2.61 | 0.008 | 0.057 | 6  | No |

### Result S3-11: Mean deviation effect size of men with ADHD

Effect size of mean deviation of men with ADHD, lower and upper bound of confidence interval. The t-statistics, p-value, and adjusted p-value by Benjamini correction (FDR  $q=0.05$ ), the rank of p-value and whether the tract is significant after multiple correction.

|          | ES    | CI_low | CI_up | t     | p     | p_adj | rank | Significance |
|----------|-------|--------|-------|-------|-------|-------|------|--------------|
| AF_L     | -0.10 | -0.32  | 0.11  | -0.94 | 0.174 | 0.435 | 18   | No           |
| AF_R     | -0.03 | -0.24  | 0.18  | -0.28 | 0.389 | 0.501 | 35   | No           |
| SLF1_L   | -0.01 | -0.22  | 0.21  | -0.07 | 0.473 | 0.519 | 41   | No           |
| SLF1_R   | -0.15 | -0.37  | 0.06  | -1.38 | 0.086 | 0.644 | 6    | No           |
| SLF2_L   | 0.13  | -0.08  | 0.35  | 1.20  | 0.116 | 0.653 | 8    | No           |
| SLF2_R   | 0.09  | -0.13  | 0.30  | 0.80  | 0.212 | 0.478 | 20   | No           |
| SLF3_L   | 0.13  | -0.08  | 0.35  | 1.20  | 0.116 | 0.582 | 9    | No           |
| SLF3_R   | 0.02  | -0.20  | 0.23  | 0.17  | 0.433 | 0.487 | 40   | No           |
| FAT_L    | 0.17  | -0.04  | 0.39  | 1.60  | 0.057 | 0.637 | 4    | No           |
| FAT_R    | -0.03 | -0.24  | 0.19  | -0.23 | 0.408 | 0.497 | 37   | No           |
| PF_L     | -0.08 | -0.30  | 0.13  | -0.75 | 0.227 | 0.426 | 24   | No           |
| PF_R     | 0.04  | -0.17  | 0.26  | 0.39  | 0.348 | 0.490 | 32   | No           |
| CGB_L    | -0.06 | -0.27  | 0.16  | -0.51 | 0.305 | 0.458 | 30   | No           |
| CGB_R    | -0.11 | -0.32  | 0.11  | -1.00 | 0.161 | 0.454 | 16   | No           |
| CGH_L    | 0.26  | 0.04   | 0.48  | 2.39  | 0.010 | 0.435 | 1    | No           |
| CGH_R    | 0.05  | -0.16  | 0.27  | 0.48  | 0.317 | 0.460 | 31   | No           |
| FX_L     | -0.17 | -0.38  | 0.05  | -1.54 | 0.064 | 0.577 | 5    | No           |
| FX_R     | -0.13 | -0.34  | 0.08  | -1.19 | 0.118 | 0.531 | 10   | No           |
| ST_L     | 0.04  | -0.17  | 0.26  | 0.39  | 0.350 | 0.477 | 33   | No           |
| ST_R     | 0.08  | -0.13  | 0.30  | 0.76  | 0.223 | 0.437 | 23   | No           |
| UF_L     | 0.03  | -0.18  | 0.25  | 0.29  | 0.387 | 0.513 | 34   | No           |
| UF_R     | -0.01 | -0.22  | 0.21  | -0.06 | 0.476 | 0.510 | 42   | No           |
| IFOF_L   | 0.07  | -0.15  | 0.28  | 0.61  | 0.273 | 0.456 | 27   | No           |
| IFOF_R   | -0.06 | -0.27  | 0.16  | -0.53 | 0.300 | 0.466 | 29   | No           |
| ILF_L    | 0.14  | -0.07  | 0.36  | 1.32  | 0.096 | 0.615 | 7    | No           |
| ILF_R    | 0.26  | 0.04   | 0.48  | 2.37  | 0.010 | 0.228 | 2    | No           |
| FS_PFC_L | 0.10  | -0.11  | 0.32  | 0.95  | 0.172 | 0.454 | 17   | No           |
| FS_PFC_R | 0.00  | -0.21  | 0.22  | 0.02  | 0.493 | 0.493 | 45   | No           |
| FS_M_L   | -0.03 | -0.24  | 0.19  | -0.24 | 0.406 | 0.507 | 36   | No           |

|                  |       |       |      |       |       |       |    |    |
|------------------|-------|-------|------|-------|-------|-------|----|----|
| <b>FS_M_R</b>    | 0.11  | -0.10 | 0.32 | 1.01  | 0.158 | 0.506 | 14 | No |
| <b>TR_PFC_L</b>  | 0.02  | -0.20 | 0.23 | 0.17  | 0.432 | 0.499 | 39 | No |
| <b>TR_PFC_R</b>  | -0.09 | -0.30 | 0.13 | -0.79 | 0.215 | 0.461 | 21 | No |
| <b>TR_SM_L</b>   | -0.12 | -0.34 | 0.09 | -1.12 | 0.133 | 0.459 | 13 | No |
| <b>TR_SM_R</b>   | -0.18 | -0.39 | 0.04 | -1.64 | 0.053 | 0.788 | 3  | No |
| <b>TR_aud_L</b>  | -0.06 | -0.27 | 0.16 | -0.53 | 0.297 | 0.478 | 28 | No |
| <b>TR_aud_R</b>  | -0.13 | -0.34 | 0.09 | -1.19 | 0.119 | 0.488 | 11 | No |
| <b>TR_opt_L</b>  | 0.07  | -0.14 | 0.29 | 0.67  | 0.251 | 0.452 | 25 | No |
| <b>TR_opt_R</b>  | 0.00  | -0.22 | 0.21 | -0.04 | 0.485 | 0.508 | 43 | No |
| <b>CST_L</b>     | -0.07 | -0.29 | 0.14 | -0.66 | 0.257 | 0.444 | 26 | No |
| <b>CST_R</b>     | 0.02  | -0.19 | 0.24 | 0.20  | 0.423 | 0.500 | 38 | No |
| <b>CC_PFC</b>    | -0.08 | -0.30 | 0.13 | -0.77 | 0.223 | 0.455 | 22 | No |
| <b>CC_SM</b>     | -0.13 | -0.34 | 0.09 | -1.17 | 0.124 | 0.464 | 12 | No |
| <b>CC_pariet</b> | 0.11  | -0.11 | 0.32 | 1.00  | 0.160 | 0.481 | 15 | No |
| <b>CC_temp</b>   | -0.10 | -0.32 | 0.11 | -0.94 | 0.175 | 0.415 | 19 | No |
| <b>CC_splen</b>  | 0.00  | -0.22 | 0.21 | -0.03 | 0.487 | 0.498 | 44 | No |

### Result S3-12: Mean deviation effect size of women with ADHD

The effect size of the mean deviation of women with ADHD, lower and upper bound of the confidence interval. The t-statistics, p-value, and adjusted p-value by Benjamini correction (FDR  $q=0.05$ ), the rank of p-value and whether the tract is significant after multiple corrections.

|          | ES    | CI_low | CI_up | t     | p     | p_adj | rank | Significance |
|----------|-------|--------|-------|-------|-------|-------|------|--------------|
| AF_L     | -0.36 | -0.66  | -0.07 | -2.52 | 0.008 | 0.043 | 8    | Yes          |
| AF_R     | -0.16 | -0.45  | 0.12  | -1.12 | 0.135 | 0.203 | 30   | No           |
| SLF1_L   | -0.14 | -0.43  | 0.14  | -0.98 | 0.166 | 0.234 | 32   | No           |
| SLF1_R   | -0.34 | -0.63  | -0.05 | -2.33 | 0.012 | 0.060 | 9    | No           |
| SLF2_L   | -0.32 | -0.61  | -0.03 | -2.19 | 0.017 | 0.063 | 12   | No           |
| SLF2_R   | -0.30 | -0.59  | -0.01 | -2.05 | 0.023 | 0.069 | 15   | No           |
| SLF3_L   | -0.37 | -0.66  | -0.08 | -2.58 | 0.007 | 0.042 | 7    | Yes          |
| SLF3_R   | -0.05 | -0.34  | 0.23  | -0.38 | 0.353 | 0.430 | 37   | No           |
| FAT_L    | -0.29 | -0.58  | 0.00  | -2.03 | 0.024 | 0.068 | 16   | No           |
| FAT_R    | -0.12 | -0.40  | 0.17  | -0.82 | 0.209 | 0.285 | 33   | No           |
| PF_L     | -0.03 | -0.31  | 0.26  | -0.18 | 0.429 | 0.471 | 41   | No           |
| PF_R     | 0.00  | -0.28  | 0.28  | 0.00  | 0.498 | 0.498 | 45   | No           |
| CGB_L    | -0.40 | -0.69  | -0.10 | -2.76 | 0.004 | 0.037 | 5    | Yes          |
| CGB_R    | -0.19 | -0.48  | 0.10  | -1.31 | 0.098 | 0.157 | 28   | No           |
| CGH_L    | -0.06 | -0.35  | 0.22  | -0.44 | 0.332 | 0.427 | 35   | No           |
| CGH_R    | -0.31 | -0.60  | -0.02 | -2.16 | 0.018 | 0.062 | 13   | No           |
| FX_L     | -0.17 | -0.46  | 0.11  | -1.20 | 0.117 | 0.182 | 29   | No           |
| FX_R     | 0.02  | -0.26  | 0.30  | 0.15  | 0.440 | 0.460 | 43   | No           |
| ST_L     | 0.01  | -0.28  | 0.29  | 0.05  | 0.481 | 0.492 | 44   | No           |
| ST_R     | 0.27  | -0.02  | 0.56  | 1.86  | 0.035 | 0.082 | 19   | No           |
| UF_L     | -0.23 | -0.52  | 0.06  | -1.60 | 0.058 | 0.105 | 25   | No           |
| UF_R     | -0.28 | -0.57  | 0.01  | -1.92 | 0.031 | 0.076 | 18   | No           |
| IFOF_L   | -0.26 | -0.55  | 0.03  | -1.82 | 0.038 | 0.074 | 23   | No           |
| IFOF_R   | -0.26 | -0.55  | 0.03  | -1.81 | 0.038 | 0.071 | 24   | No           |
| ILF_L    | 0.05  | -0.23  | 0.33  | 0.34  | 0.369 | 0.438 | 38   | No           |
| ILF_R    | -0.04 | -0.33  | 0.24  | -0.31 | 0.381 | 0.439 | 39   | No           |
| FS_PFC_L | -0.45 | -0.75  | -0.15 | -3.11 | 0.002 | 0.036 | 2    | Yes          |
| FS_PFC_R | -0.41 | -0.70  | -0.11 | -2.84 | 0.003 | 0.038 | 4    | Yes          |
| FS_M_L   | -0.29 | -0.58  | 0.00  | -2.00 | 0.026 | 0.069 | 17   | No           |

|                  |       |       |       |       |        |       |    |     |
|------------------|-------|-------|-------|-------|--------|-------|----|-----|
| <b>FS_M_R</b>    | -0.33 | -0.62 | -0.04 | -2.30 | 0.013  | 0.058 | 10 | No  |
| <b>TR_PFC_L</b>  | -0.38 | -0.67 | -0.09 | -2.65 | 0.006  | 0.041 | 6  | Yes |
| <b>TR_PFC_R</b>  | -0.33 | -0.62 | -0.04 | -2.26 | 0.014  | 0.059 | 11 | No  |
| <b>TR_SM_L</b>   | -0.06 | -0.34 | 0.22  | -0.41 | 0.343  | 0.429 | 36 | No  |
| <b>TR_SM_R</b>   | 0.09  | -0.19 | 0.37  | 0.62  | 0.268  | 0.355 | 34 | No  |
| <b>TR_aud_L</b>  | -0.23 | -0.52 | 0.06  | -1.58 | 0.060  | 0.100 | 27 | No  |
| <b>TR_aud_R</b>  | -0.27 | -0.56 | 0.02  | -1.85 | 0.035  | 0.079 | 20 | No  |
| <b>TR_opt_L</b>  | 0.04  | -0.25 | 0.32  | 0.24  | 0.404  | 0.455 | 40 | No  |
| <b>TR_opt_R</b>  | 0.03  | -0.26 | 0.31  | 0.18  | 0.430  | 0.461 | 42 | No  |
| <b>CST_L</b>     | -0.23 | -0.52 | 0.06  | -1.60 | 0.058  | 0.101 | 26 | No  |
| <b>CST_R</b>     | -0.15 | -0.43 | 0.14  | -1.03 | 0.154  | 0.224 | 31 | No  |
| <b>CC_PFC</b>    | -0.61 | -0.91 | -0.30 | -4.20 | <0.001 | 0.003 | 1  | Yes |
| <b>CC_SM</b>     | -0.26 | -0.55 | 0.02  | -1.82 | 0.037  | 0.076 | 22 | No  |
| <b>CC_pariet</b> | -0.27 | -0.55 | 0.02  | -1.84 | 0.036  | 0.077 | 21 | No  |
| <b>CC_temp</b>   | -0.31 | -0.60 | -0.02 | -2.15 | 0.018  | 0.059 | 14 | No  |
| <b>CC_splen</b>  | -0.43 | -0.72 | -0.13 | -2.96 | 0.002  | 0.036 | 3  | Yes |



### Result S3-13: Mean deviation effect size of boys with ASD

The effect size of the mean deviation of boys with ASD, lower and upper bound of the confidence interval. The t-statistics, p-value, and adjusted p-value by Benjamini correction (FDR  $q=0.05$ ), the rank of p-value and whether the tract is significant after multiple corrections.

|          | ES    | CI_low | CI_up | t     | p      | p_adj  | rank | Significance |
|----------|-------|--------|-------|-------|--------|--------|------|--------------|
| AF_L     | -0.30 | -0.50  | -0.10 | -2.95 | 0.002  | 0.015  | 6    | Yes          |
| AF_R     | -0.23 | -0.43  | -0.03 | -2.27 | 0.013  | 0.034  | 17   | Yes          |
| SLF1_L   | 0.08  | -0.12  | 0.28  | 0.80  | 0.214  | 0.260  | 37   | No           |
| SLF1_R   | 0.09  | -0.11  | 0.29  | 0.89  | 0.187  | 0.234  | 36   | No           |
| SLF2_L   | -0.25 | -0.45  | -0.04 | -2.41 | 0.009  | 0.028  | 14   | Yes          |
| SLF2_R   | -0.20 | -0.40  | 0.00  | -1.94 | 0.028  | 0.052  | 24   | No           |
| SLF3_L   | -0.18 | -0.38  | 0.02  | -1.75 | 0.041  | 0.067  | 28   | No           |
| SLF3_R   | -0.25 | -0.45  | -0.05 | -2.47 | 0.008  | 0.029  | 12   | Yes          |
| FAT_L    | -0.24 | -0.44  | -0.04 | -2.37 | 0.010  | 0.030  | 15   | Yes          |
| FAT_R    | -0.18 | -0.38  | 0.02  | -1.77 | 0.040  | 0.070  | 26   | No           |
| PF_L     | -0.29 | -0.49  | -0.08 | -2.82 | 0.003  | 0.016  | 8    | Yes          |
| PF_R     | -0.12 | -0.32  | 0.08  | -1.16 | 0.124  | 0.165  | 34   | No           |
| CGB_L    | -0.34 | -0.55  | -0.14 | -3.40 | <0.001 | 0.004  | 5    | Yes          |
| CGB_R    | -0.21 | -0.41  | -0.01 | -2.08 | 0.020  | 0.046  | 20   | Yes          |
| CGH_L    | -0.13 | -0.33  | 0.07  | -1.31 | 0.096  | 0.131  | 33   | No           |
| CGH_R    | -0.19 | -0.39  | 0.01  | -1.84 | 0.035  | 0.062  | 25   | No           |
| FX_L     | -0.20 | -0.40  | 0.00  | -1.96 | 0.026  | 0.051  | 23   | No           |
| FX_R     | -0.18 | -0.38  | 0.02  | -1.76 | 0.041  | 0.069  | 27   | No           |
| ST_L     | -0.24 | -0.44  | -0.03 | -2.32 | 0.011  | 0.031  | 16   | Yes          |
| ST_R     | -0.11 | -0.31  | 0.09  | -1.10 | 0.137  | 0.176  | 35   | No           |
| UF_L     | -0.46 | -0.67  | -0.25 | -4.51 | <0.001 | <0.001 | 3    | Yes          |
| UF_R     | -0.46 | -0.67  | -0.25 | -4.57 | <0.001 | <0.001 | 2    | Yes          |
| IFOF_L   | -0.28 | -0.49  | -0.08 | -2.80 | 0.003  | 0.015  | 9    | Yes          |
| IFOF_R   | -0.35 | -0.56  | -0.15 | -3.48 | <0.001 | 0.004  | 4    | Yes          |
| ILF_L    | -0.21 | -0.41  | 0.00  | -2.02 | 0.023  | 0.049  | 21   | Yes          |
| ILF_R    | -0.17 | -0.37  | 0.03  | -1.72 | 0.045  | 0.069  | 29   | No           |
| FS_PFC_L | -0.29 | -0.50  | -0.09 | -2.88 | 0.002  | 0.016  | 7    | Yes          |
| FS_PFC_R | -0.25 | -0.45  | -0.04 | -2.42 | 0.009  | 0.030  | 13   | Yes          |
| FS_M_L   | -0.07 | -0.27  | 0.13  | -0.69 | 0.245  | 0.290  | 38   | No           |

|                  |       |       |       |       |        |        |    |     |
|------------------|-------|-------|-------|-------|--------|--------|----|-----|
| <b>FS_M_R</b>    | -0.17 | -0.37 | 0.03  | -1.66 | 0.050  | 0.075  | 30 | No  |
| <b>TR_PFC_L</b>  | -0.22 | -0.42 | -0.02 | -2.20 | 0.015  | 0.038  | 18 | Yes |
| <b>TR_PFC_R</b>  | -0.26 | -0.46 | -0.06 | -2.55 | 0.006  | 0.025  | 11 | Yes |
| <b>TR_SM_L</b>   | -0.02 | -0.22 | 0.18  | -0.22 | 0.413  | 0.422  | 44 | No  |
| <b>TR_SM_R</b>   | -0.03 | -0.23 | 0.17  | -0.27 | 0.394  | 0.412  | 43 | No  |
| <b>TR_aud_L</b>  | -0.14 | -0.34 | 0.06  | -1.34 | 0.092  | 0.129  | 32 | No  |
| <b>TR_aud_R</b>  | -0.22 | -0.42 | -0.02 | -2.15 | 0.017  | 0.040  | 19 | Yes |
| <b>TR_opt_L</b>  | -0.04 | -0.24 | 0.16  | -0.36 | 0.359  | 0.385  | 42 | No  |
| <b>TR_opt_R</b>  | -0.20 | -0.40 | 0.00  | -1.97 | 0.026  | 0.052  | 22 | No  |
| <b>CST_L</b>     | 0.04  | -0.16 | 0.24  | 0.37  | 0.356  | 0.390  | 41 | No  |
| <b>CST_R</b>     | 0.06  | -0.14 | 0.26  | 0.63  | 0.264  | 0.305  | 39 | No  |
| <b>CC_PFC</b>    | -0.47 | -0.68 | -0.26 | -4.65 | <0.001 | <0.001 | 1  | Yes |
| <b>CC_SM</b>     | -0.05 | -0.25 | 0.15  | -0.48 | 0.317  | 0.357  | 40 | No  |
| <b>CC_pariet</b> | 0.01  | -0.19 | 0.20  | 0.06  | 0.477  | 0.477  | 45 | No  |
| <b>CC_temp</b>   | -0.28 | -0.49 | -0.08 | -2.79 | 0.003  | 0.015  | 10 | Yes |
| <b>CC_splen</b>  | -0.14 | -0.34 | 0.06  | -1.41 | 0.080  | 0.117  | 31 | No  |

### Result S3-14: Mean deviation effect size of girls with ASD

The effect size of mean deviation of girls with ASD, lower and upper bound of confidence interval.

The t-statistics, p-value, and adjusted p-value by Benjamini correction (FDR  $q=0.05$ ), the rank of p-value and whether the tract is significant after multiple corrections.

|          | ES    | CI_low | CI_up | t     | p     | p_adj | rank | Significance |
|----------|-------|--------|-------|-------|-------|-------|------|--------------|
| AF_L     | -0.28 | -1.03  | 0.48  | -0.73 | 0.247 | 1.000 | 8    | No           |
| AF_R     | -0.15 | -0.90  | 0.59  | -0.41 | 0.348 | 0.746 | 21   | No           |
| SLF1_L   | 0.01  | -0.73  | 0.75  | 0.02  | 0.492 | 0.503 | 44   | No           |
| SLF1_R   | -0.14 | -0.89  | 0.60  | -0.37 | 0.361 | 0.706 | 23   | No           |
| SLF2_L   | -0.24 | -0.99  | 0.51  | -0.64 | 0.274 | 1.000 | 10   | No           |
| SLF2_R   | -0.28 | -1.03  | 0.48  | -0.74 | 0.244 | 1.000 | 6    | No           |
| SLF3_L   | 0.08  | -0.66  | 0.83  | 0.22  | 0.416 | 0.604 | 31   | No           |
| SLF3_R   | -0.01 | -0.75  | 0.73  | -0.03 | 0.490 | 0.513 | 43   | No           |
| FAT_L    | 0.13  | -0.61  | 0.87  | 0.34  | 0.371 | 0.668 | 25   | No           |
| FAT_R    | 0.08  | -0.66  | 0.83  | 0.22  | 0.417 | 0.586 | 32   | No           |
| PF_L     | -0.04 | -0.78  | 0.70  | -0.11 | 0.457 | 0.542 | 38   | No           |
| PF_R     | -0.03 | -0.77  | 0.71  | -0.08 | 0.470 | 0.542 | 39   | No           |
| CGB_L    | 0.20  | -0.55  | 0.95  | 0.52  | 0.309 | 0.928 | 15   | No           |
| CGB_R    | 0.09  | -0.65  | 0.83  | 0.24  | 0.410 | 0.636 | 29   | No           |
| CGH_L    | 0.17  | -0.57  | 0.92  | 0.46  | 0.330 | 0.783 | 19   | No           |
| CGH_R    | 0.06  | -0.68  | 0.80  | 0.15  | 0.443 | 0.553 | 36   | No           |
| FX_L     | -0.33 | -1.09  | 0.43  | -0.86 | 0.210 | 1.000 | 4    | No           |
| FX_R     | -0.39 | -1.15  | 0.38  | -1.02 | 0.174 | 1.000 | 2    | No           |
| ST_L     | -0.18 | -0.92  | 0.57  | -0.47 | 0.327 | 0.921 | 16   | No           |
| ST_R     | 0.02  | -0.72  | 0.76  | 0.05  | 0.482 | 0.516 | 42   | No           |
| UF_L     | 0.20  | -0.54  | 0.95  | 0.54  | 0.304 | 0.979 | 14   | No           |
| UF_R     | 0.13  | -0.61  | 0.87  | 0.34  | 0.371 | 0.696 | 24   | No           |
| IFOF_L   | 0.05  | -0.69  | 0.79  | 0.13  | 0.450 | 0.547 | 37   | No           |
| IFOF_R   | -0.12 | -0.87  | 0.62  | -0.33 | 0.377 | 0.653 | 26   | No           |
| ILF_L    | 0.00  | -0.74  | 0.74  | 0.00  | 0.499 | 0.499 | 45   | No           |
| ILF_R    | -0.17 | -0.92  | 0.57  | -0.46 | 0.330 | 0.825 | 18   | No           |
| FS_PFC_L | 0.31  | -0.45  | 1.06  | 0.81  | 0.225 | 1.000 | 5    | No           |
| FS_PFC_R | 0.21  | -0.54  | 0.95  | 0.54  | 0.303 | 1.000 | 13   | No           |
| FS_M_L   | -0.11 | -0.85  | 0.63  | -0.29 | 0.391 | 0.628 | 28   | No           |

|                  |       |       |      |       |       |       |    |    |
|------------------|-------|-------|------|-------|-------|-------|----|----|
| <b>FS_M_R</b>    | 0.27  | -0.49 | 1.02 | 0.71  | 0.253 | 1.000 | 9  | No |
| <b>TR_PFC_L</b>  | 0.28  | -0.48 | 1.03 | 0.73  | 0.246 | 1.000 | 7  | No |
| <b>TR_PFC_R</b>  | 0.15  | -0.60 | 0.89 | 0.39  | 0.356 | 0.729 | 22 | No |
| <b>TR_SM_L</b>   | -0.06 | -0.80 | 0.68 | -0.15 | 0.441 | 0.567 | 35 | No |
| <b>TR_SM_R</b>   | 0.03  | -0.71 | 0.77 | 0.07  | 0.472 | 0.531 | 40 | No |
| <b>TR_aud_L</b>  | 0.24  | -0.51 | 0.99 | 0.63  | 0.275 | 1.000 | 11 | No |
| <b>TR_aud_R</b>  | 0.03  | -0.71 | 0.77 | 0.07  | 0.473 | 0.519 | 41 | No |
| <b>TR_opt_L</b>  | -0.21 | -0.96 | 0.54 | -0.55 | 0.300 | 1.000 | 12 | No |
| <b>TR_opt_R</b>  | -0.16 | -0.90 | 0.59 | -0.42 | 0.344 | 0.774 | 20 | No |
| <b>CST_L</b>     | 0.12  | -0.62 | 0.86 | 0.31  | 0.382 | 0.637 | 27 | No |
| <b>CST_R</b>     | 0.35  | -0.41 | 1.11 | 0.93  | 0.194 | 1.000 | 3  | No |
| <b>CC_PFC</b>    | 0.09  | -0.65 | 0.83 | 0.23  | 0.412 | 0.618 | 30 | No |
| <b>CC_SM</b>     | 0.07  | -0.67 | 0.82 | 0.19  | 0.426 | 0.581 | 33 | No |
| <b>CC_pariet</b> | -0.40 | -1.17 | 0.37 | -1.06 | 0.166 | 1.000 | 1  | No |
| <b>CC_temp</b>   | 0.07  | -0.67 | 0.81 | 0.19  | 0.428 | 0.566 | 34 | No |
| <b>CC_splen</b>  | 0.18  | -0.57 | 0.92 | 0.47  | 0.328 | 0.868 | 17 | No |

### Result S3-15: Mean deviation effect size of men with ASD

The effect size of the mean deviation of men with ASD, lower and upper bound of confidence interval. The t-statistics, p-value, and adjusted p-value by Benjamini correction (FDR  $q=0.05$ ), the rank of p-value and whether the tract is significant after multiple corrections.

|          | ES    | CI_low | CI_up | t     | p      | p_adj | rank | Significance |
|----------|-------|--------|-------|-------|--------|-------|------|--------------|
| AF_L     | -0.42 | -0.68  | -0.16 | -3.26 | 0.001  | 0.014 | 3    | Yes          |
| AF_R     | -0.20 | -0.45  | 0.06  | -1.55 | 0.064  | 0.137 | 21   | No           |
| SLF1_L   | -0.13 | -0.38  | 0.12  | -1.04 | 0.152  | 0.214 | 32   | No           |
| SLF1_R   | -0.14 | -0.39  | 0.11  | -1.11 | 0.136  | 0.211 | 29   | No           |
| SLF2_L   | -0.21 | -0.46  | 0.04  | -1.64 | 0.053  | 0.148 | 16   | No           |
| SLF2_R   | -0.26 | -0.52  | -0.01 | -2.06 | 0.022  | 0.099 | 10   | No           |
| SLF3_L   | -0.25 | -0.50  | 0.01  | -1.92 | 0.030  | 0.122 | 11   | No           |
| SLF3_R   | -0.28 | -0.53  | -0.02 | -2.15 | 0.018  | 0.088 | 9    | No           |
| FAT_L    | -0.29 | -0.54  | -0.03 | -2.24 | 0.014  | 0.080 | 8    | No           |
| FAT_R    | -0.21 | -0.47  | 0.04  | -1.66 | 0.051  | 0.164 | 14   | No           |
| PF_L     | -0.35 | -0.60  | -0.09 | -2.71 | 0.004  | 0.033 | 6    | Yes          |
| PF_R     | -0.01 | -0.26  | 0.25  | -0.04 | 0.484  | 0.484 | 45   | No           |
| CGB_L    | -0.48 | -0.74  | -0.21 | -3.75 | <0.001 | 0.005 | 2    | Yes          |
| CGB_R    | -0.13 | -0.39  | 0.12  | -1.05 | 0.150  | 0.217 | 31   | No           |
| CGH_L    | -0.04 | -0.29  | 0.21  | -0.29 | 0.385  | 0.433 | 40   | No           |
| CGH_R    | -0.14 | -0.39  | 0.12  | -1.06 | 0.147  | 0.220 | 30   | No           |
| FX_L     | -0.15 | -0.40  | 0.10  | -1.15 | 0.127  | 0.204 | 28   | No           |
| FX_R     | -0.16 | -0.41  | 0.09  | -1.24 | 0.109  | 0.182 | 27   | No           |
| ST_L     | 0.21  | -0.05  | 0.46  | 1.62  | 0.055  | 0.145 | 17   | No           |
| ST_R     | 0.21  | -0.04  | 0.47  | 1.66  | 0.051  | 0.154 | 15   | No           |
| UF_L     | -0.18 | -0.43  | 0.07  | -1.39 | 0.085  | 0.152 | 25   | No           |
| UF_R     | 0.01  | -0.24  | 0.26  | 0.09  | 0.464  | 0.486 | 43   | No           |
| IFOF_L   | -0.24 | -0.49  | 0.01  | -1.87 | 0.033  | 0.124 | 12   | No           |
| IFOF_R   | -0.05 | -0.31  | 0.20  | -0.43 | 0.335  | 0.396 | 38   | No           |
| ILF_L    | 0.30  | 0.04   | 0.55  | 2.32  | 0.012  | 0.076 | 7    | No           |
| ILF_R    | 0.19  | -0.06  | 0.44  | 1.50  | 0.070  | 0.143 | 22   | No           |
| FS_PFC_L | -0.20 | -0.46  | 0.05  | -1.58 | 0.059  | 0.148 | 18   | No           |
| FS_PFC_R | -0.19 | -0.44  | 0.07  | -1.45 | 0.076  | 0.142 | 24   | No           |
| FS_M_L   | -0.01 | -0.26  | 0.24  | -0.08 | 0.468  | 0.479 | 44   | No           |

|                  |       |       |       |       |        |       |    |     |
|------------------|-------|-------|-------|-------|--------|-------|----|-----|
| <b>FS_M_R</b>    | -0.08 | -0.33 | 0.17  | -0.64 | 0.261  | 0.336 | 35 | No  |
| <b>TR_PFC_L</b>  | -0.22 | -0.47 | 0.03  | -1.71 | 0.046  | 0.159 | 13 | No  |
| <b>TR_PFC_R</b>  | -0.12 | -0.37 | 0.13  | -0.95 | 0.173  | 0.236 | 33 | No  |
| <b>TR_SM_L</b>   | -0.19 | -0.44 | 0.06  | -1.49 | 0.071  | 0.138 | 23 | No  |
| <b>TR_SM_R</b>   | -0.04 | -0.29 | 0.21  | -0.29 | 0.385  | 0.423 | 41 | No  |
| <b>TR_aud_L</b>  | -0.40 | -0.66 | -0.14 | -3.15 | 0.001  | 0.014 | 4  | Yes |
| <b>TR_aud_R</b>  | -0.16 | -0.41 | 0.09  | -1.25 | 0.107  | 0.186 | 26 | No  |
| <b>TR_opt_L</b>  | -0.04 | -0.29 | 0.21  | -0.30 | 0.384  | 0.443 | 39 | No  |
| <b>TR_opt_R</b>  | 0.20  | -0.05 | 0.46  | 1.58  | 0.060  | 0.142 | 19 | No  |
| <b>CST_L</b>     | 0.06  | -0.19 | 0.31  | 0.46  | 0.323  | 0.392 | 37 | No  |
| <b>CST_R</b>     | 0.12  | -0.14 | 0.37  | 0.91  | 0.184  | 0.244 | 34 | No  |
| <b>CC_PFC</b>    | -0.53 | -0.80 | -0.26 | -4.13 | <0.001 | 0.003 | 1  | Yes |
| <b>CC_SM</b>     | -0.38 | -0.63 | -0.12 | -2.93 | 0.002  | 0.022 | 5  | Yes |
| <b>CC_pariet</b> | -0.07 | -0.32 | 0.18  | -0.55 | 0.292  | 0.364 | 36 | No  |
| <b>CC_temp</b>   | -0.20 | -0.45 | 0.05  | -1.56 | 0.062  | 0.140 | 20 | No  |
| <b>CC_splen</b>  | -0.02 | -0.27 | 0.23  | -0.17 | 0.432  | 0.463 | 42 | No  |

### Result S3-16: Mean deviation effect size of women with ASD

The effect size of mean deviation of women with ASD, lower and upper bound of confidence interval. The t-statistics, p-value, and adjusted p value by Benjamini correction (FDR  $q=0.05$ ), the rank of p-value and whether the tract is significant after multiple corrections.

|          | ES    | CI_low | CI_up | t     | p     | p_adj | rank | Significance |
|----------|-------|--------|-------|-------|-------|-------|------|--------------|
| AF_L     | -0.24 | -0.87  | 0.39  | -0.75 | 0.236 | 0.507 | 21   | No           |
| AF_R     | -0.39 | -1.03  | 0.26  | -1.22 | 0.126 | 0.567 | 10   | No           |
| SLF1_L   | -0.34 | -0.98  | 0.30  | -1.08 | 0.154 | 0.630 | 11   | No           |
| SLF1_R   | 0.02  | -0.59  | 0.64  | 0.08  | 0.469 | 0.515 | 41   | No           |
| SLF2_L   | -0.02 | -0.64  | 0.60  | -0.06 | 0.479 | 0.513 | 42   | No           |
| SLF2_R   | -0.12 | -0.74  | 0.50  | -0.39 | 0.354 | 0.514 | 31   | No           |
| SLF3_L   | -0.04 | -0.66  | 0.58  | -0.11 | 0.456 | 0.513 | 40   | No           |
| SLF3_R   | -0.11 | -0.73  | 0.51  | -0.34 | 0.370 | 0.505 | 33   | No           |
| FAT_L    | -0.46 | -1.11  | 0.19  | -1.45 | 0.090 | 0.809 | 5    | No           |
| FAT_R    | 0.26  | -0.37  | 0.89  | 0.81  | 0.218 | 0.546 | 18   | No           |
| PF_L     | 0.17  | -0.45  | 0.80  | 0.55  | 0.298 | 0.516 | 26   | No           |
| PF_R     | 0.33  | -0.31  | 0.96  | 1.03  | 0.164 | 0.568 | 13   | No           |
| CGB_L    | 0.10  | -0.52  | 0.72  | 0.33  | 0.376 | 0.497 | 34   | No           |
| CGB_R    | -0.13 | -0.75  | 0.50  | -0.40 | 0.351 | 0.526 | 30   | No           |
| CGH_L    | -0.21 | -0.84  | 0.41  | -0.68 | 0.258 | 0.527 | 22   | No           |
| CGH_R    | -0.33 | -0.97  | 0.30  | -1.05 | 0.160 | 0.600 | 12   | No           |
| FX_L     | 0.30  | -0.34  | 0.93  | 0.94  | 0.187 | 0.560 | 15   | No           |
| FX_R     | 0.27  | -0.36  | 0.90  | 0.86  | 0.207 | 0.548 | 17   | No           |
| ST_L     | -0.13 | -0.75  | 0.49  | -0.41 | 0.344 | 0.534 | 29   | No           |
| ST_R     | 0.25  | -0.38  | 0.88  | 0.79  | 0.224 | 0.531 | 19   | No           |
| UF_L     | -0.18 | -0.80  | 0.45  | -0.56 | 0.294 | 0.529 | 25   | No           |
| UF_R     | -0.53 | -1.19  | 0.14  | -1.66 | 0.066 | 0.983 | 3    | No           |
| IFOF_L   | -0.08 | -0.70  | 0.54  | -0.25 | 0.405 | 0.521 | 35   | No           |
| IFOF_R   | 0.01  | -0.61  | 0.63  | 0.04  | 0.486 | 0.497 | 44   | No           |
| ILF_L    | -0.15 | -0.77  | 0.47  | -0.48 | 0.322 | 0.536 | 27   | No           |
| ILF_R    | -0.07 | -0.69  | 0.55  | -0.23 | 0.413 | 0.502 | 37   | No           |
| FS_PFC_L | -0.43 | -1.07  | 0.22  | -1.35 | 0.105 | 0.790 | 6    | No           |
| FS_PFC_R | -0.40 | -1.04  | 0.25  | -1.26 | 0.120 | 0.675 | 8    | No           |
| FS_M_L   | 0.00  | -0.62  | 0.61  | -0.02 | 0.494 | 0.494 | 45   | No           |

|                  |       |       |      |       |       |       |    |    |
|------------------|-------|-------|------|-------|-------|-------|----|----|
| <b>FS_M_R</b>    | 0.54  | -0.12 | 1.20 | 1.71  | 0.061 | 1.368 | 2  | No |
| <b>TR_PFC_L</b>  | -0.18 | -0.80 | 0.45 | -0.57 | 0.292 | 0.547 | 24 | No |
| <b>TR_PFC_R</b>  | -0.11 | -0.74 | 0.51 | -0.36 | 0.364 | 0.512 | 32 | No |
| <b>TR_SM_L</b>   | 0.13  | -0.49 | 0.76 | 0.42  | 0.341 | 0.548 | 28 | No |
| <b>TR_SM_R</b>   | 0.08  | -0.55 | 0.70 | 0.24  | 0.408 | 0.511 | 36 | No |
| <b>TR_aud_L</b>  | -0.66 | -1.35 | 0.02 | -2.09 | 0.033 | 1.488 | 1  | No |
| <b>TR_aud_R</b>  | -0.19 | -0.81 | 0.44 | -0.60 | 0.282 | 0.552 | 23 | No |
| <b>TR_opt_L</b>  | 0.42  | -0.22 | 1.07 | 1.34  | 0.107 | 0.688 | 7  | No |
| <b>TR_opt_R</b>  | 0.32  | -0.32 | 0.95 | 1.00  | 0.172 | 0.554 | 14 | No |
| <b>CST_L</b>     | 0.25  | -0.38 | 0.88 | 0.78  | 0.226 | 0.509 | 20 | No |
| <b>CST_R</b>     | 0.29  | -0.34 | 0.92 | 0.92  | 0.192 | 0.540 | 16 | No |
| <b>CC_PFC</b>    | -0.49 | -1.15 | 0.16 | -1.55 | 0.077 | 0.870 | 4  | No |
| <b>CC_SM</b>     | -0.02 | -0.64 | 0.60 | -0.05 | 0.480 | 0.502 | 43 | No |
| <b>CC_pariet</b> | -0.39 | -1.03 | 0.25 | -1.23 | 0.124 | 0.621 | 9  | No |
| <b>CC_temp</b>   | -0.06 | -0.68 | 0.56 | -0.19 | 0.428 | 0.507 | 38 | No |
| <b>CC_splen</b>  | 0.04  | -0.58 | 0.66 | 0.14  | 0.447 | 0.516 | 39 | No |



### Result S4-1: Idiosyncrasy of people with ADHD

F-ratio of people with ADHD, lower and upper bound of the confidence interval. The p-value, and adjusted p-value by Benjamini correction (FDR  $q=0.05$ ), the rank of p-value and whether the tract is significant after multiple corrections.

|                 | <b>F-ratio</b> | <b>CI_low</b> | <b>CI_up</b> | <b>p</b> | <b>p_adj</b> | <b>rank</b> | <b>Significance</b> |
|-----------------|----------------|---------------|--------------|----------|--------------|-------------|---------------------|
| <b>AF_L</b>     | 1.31           | 1.07          | 1.60         | 0.004    | 0.041        | 4           | Yes                 |
| <b>AF_R</b>     | 1.21           | 0.99          | 1.48         | 0.029    | 0.088        | 15          | No                  |
| <b>SLF1_L</b>   | 1.23           | 1.01          | 1.51         | 0.018    | 0.101        | 8           | No                  |
| <b>SLF1_R</b>   | 1.02           | 0.84          | 1.25         | 0.422    | 0.513        | 37          | No                  |
| <b>SLF2_L</b>   | 1.25           | 1.03          | 1.53         | 0.012    | 0.080        | 7           | No                  |
| <b>SLF2_R</b>   | 1.07           | 0.88          | 1.32         | 0.238    | 0.346        | 31          | No                  |
| <b>SLF3_L</b>   | 1.32           | 1.09          | 1.62         | 0.003    | 0.117        | 1           | Yes                 |
| <b>SLF3_R</b>   | 1.12           | 0.92          | 1.38         | 0.122    | 0.229        | 24          | No                  |
| <b>FAT_L</b>    | 1.05           | 0.86          | 1.28         | 0.319    | 0.422        | 34          | No                  |
| <b>FAT_R</b>    | 1.00           | 0.82          | 1.23         | 0.497    | 0.545        | 41          | No                  |
| <b>PF_L</b>     | 0.94           | 0.77          | 1.15         | 0.727    | 0.760        | 43          | No                  |
| <b>PF_R</b>     | 1.11           | 0.91          | 1.36         | 0.157    | 0.272        | 26          | No                  |
| <b>CGB_L</b>    | 1.00           | 0.83          | 1.23         | 0.477    | 0.550        | 39          | No                  |
| <b>CGB_R</b>    | 1.23           | 1.01          | 1.50         | 0.021    | 0.080        | 12          | No                  |
| <b>CGH_L</b>    | 1.06           | 0.87          | 1.29         | 0.293    | 0.400        | 33          | No                  |
| <b>CGH_R</b>    | 1.07           | 0.88          | 1.32         | 0.235    | 0.352        | 30          | No                  |
| <b>FX_L</b>     | 1.01           | 0.83          | 1.24         | 0.442    | 0.524        | 38          | No                  |
| <b>FX_R</b>     | 1.04           | 0.85          | 1.27         | 0.360    | 0.450        | 36          | No                  |
| <b>ST_L</b>     | 0.78           | 0.64          | 0.95         | 0.992    | 0.992        | 45          | No                  |
| <b>ST_R</b>     | 0.91           | 0.75          | 1.12         | 0.817    | 0.836        | 44          | No                  |
| <b>UF_L</b>     | 1.18           | 0.97          | 1.45         | 0.049    | 0.130        | 17          | No                  |
| <b>UF_R</b>     | 1.22           | 1.00          | 1.50         | 0.024    | 0.082        | 13          | No                  |
| <b>IFOF_L</b>   | 1.09           | 0.90          | 1.34         | 0.194    | 0.311        | 28          | No                  |
| <b>IFOF_R</b>   | 1.19           | 0.97          | 1.45         | 0.045    | 0.126        | 16          | No                  |
| <b>ILF_L</b>    | 1.10           | 0.91          | 1.35         | 0.165    | 0.274        | 27          | No                  |
| <b>ILF_R</b>    | 1.23           | 1.01          | 1.51         | 0.018    | 0.092        | 9           | No                  |
| <b>FS_PFC_L</b> | 1.14           | 0.93          | 1.39         | 0.101    | 0.206        | 22          | No                  |
| <b>FS_PFC_R</b> | 1.13           | 0.93          | 1.38         | 0.114    | 0.224        | 23          | No                  |
| <b>FS_M_L</b>   | 1.23           | 1.01          | 1.51         | 0.018    | 0.083        | 10          | No                  |

|                  |      |      |      |       |       |    |     |
|------------------|------|------|------|-------|-------|----|-----|
| <b>FS_M_R</b>    | 1.05 | 0.86 | 1.28 | 0.327 | 0.420 | 35 | No  |
| <b>TR_PFC_L</b>  | 1.18 | 0.97 | 1.44 | 0.052 | 0.131 | 18 | No  |
| <b>TR_PFC_R</b>  | 1.31 | 1.08 | 1.61 | 0.003 | 0.050 | 3  | Yes |
| <b>TR_SM_L</b>   | 1.07 | 0.88 | 1.31 | 0.250 | 0.351 | 32 | No  |
| <b>TR_SM_R</b>   | 1.16 | 0.95 | 1.42 | 0.072 | 0.171 | 19 | No  |
| <b>TR_aud_L</b>  | 1.30 | 1.07 | 1.60 | 0.004 | 0.035 | 5  | Yes |
| <b>TR_aud_R</b>  | 1.11 | 0.91 | 1.37 | 0.142 | 0.255 | 25 | No  |
| <b>TR_opt_L</b>  | 1.00 | 0.82 | 1.23 | 0.485 | 0.545 | 40 | No  |
| <b>TR_opt_R</b>  | 1.09 | 0.90 | 1.34 | 0.194 | 0.301 | 29 | No  |
| <b>CST_L</b>     | 1.14 | 0.94 | 1.40 | 0.097 | 0.208 | 21 | No  |
| <b>CST_R</b>     | 1.23 | 1.01 | 1.50 | 0.021 | 0.085 | 11 | No  |
| <b>CC_PFC</b>    | 1.26 | 1.03 | 1.54 | 0.011 | 0.082 | 6  | No  |
| <b>CC_SM</b>     | 1.22 | 1.00 | 1.50 | 0.024 | 0.076 | 14 | No  |
| <b>CC_pariet</b> | 1.32 | 1.09 | 1.62 | 0.003 | 0.060 | 2  | Yes |
| <b>CC_temp</b>   | 1.15 | 0.94 | 1.40 | 0.088 | 0.197 | 20 | No  |
| <b>CC_splen</b>  | 0.99 | 0.81 | 1.21 | 0.542 | 0.581 | 42 | No  |

## Result S4-2: Idiosyncrasy of people with ASD

F-ratio of people with ASD, lower and upper bound of the confidence interval. The p value, and adjusted p value by Benjamini correction (FDR  $q=0.05$ ), the rank of p value and whether the tract is significant after multiple corrections.

|                 | <b>F-ratio</b> | <b>CI_low</b> | <b>CI_up</b> | <b>p</b> | <b>p_adj</b> | <b>rank</b> | <b>Significance</b> |
|-----------------|----------------|---------------|--------------|----------|--------------|-------------|---------------------|
| <b>AF_L</b>     | 1.18           | 0.94          | 1.51         | 0.081    | 0.140        | 26          | No                  |
| <b>AF_R</b>     | 1.26           | 1.00          | 1.62         | 0.023    | 0.061        | 17          | No                  |
| <b>SLF1_L</b>   | 1.60           | 1.27          | 2.05         | <0.001   | <0.001       | 4           | Yes                 |
| <b>SLF1_R</b>   | 0.97           | 0.77          | 1.25         | 0.579    | 0.620        | 42          | No                  |
| <b>SLF2_L</b>   | 1.27           | 1.01          | 1.62         | 0.021    | 0.063        | 15          | No                  |
| <b>SLF2_R</b>   | 1.20           | 0.95          | 1.53         | 0.062    | 0.127        | 22          | No                  |
| <b>SLF3_L</b>   | 1.32           | 1.05          | 1.68         | 0.009    | 0.030        | 14          | Yes                 |
| <b>SLF3_R</b>   | 1.07           | 0.85          | 1.37         | 0.270    | 0.357        | 34          | No                  |
| <b>FAT_L</b>    | 1.26           | 1.00          | 1.62         | 0.023    | 0.065        | 16          | No                  |
| <b>FAT_R</b>    | 1.17           | 0.93          | 1.50         | 0.092    | 0.147        | 28          | No                  |
| <b>PF_L</b>     | 1.05           | 0.84          | 1.34         | 0.331    | 0.392        | 38          | No                  |
| <b>PF_R</b>     | 1.15           | 0.92          | 1.47         | 0.114    | 0.171        | 30          | No                  |
| <b>CGB_L</b>    | 1.19           | 0.94          | 1.52         | 0.074    | 0.133        | 25          | No                  |
| <b>CGB_R</b>    | 1.39           | 1.11          | 1.78         | 0.002    | 0.010        | 11          | Yes                 |
| <b>CGH_L</b>    | 0.97           | 0.77          | 1.25         | 0.575    | 0.631        | 41          | No                  |
| <b>CGH_R</b>    | 1.24           | 0.99          | 1.59         | 0.032    | 0.077        | 19          | No                  |
| <b>FX_L</b>     | 1.32           | 1.05          | 1.69         | 0.008    | 0.029        | 13          | Yes                 |
| <b>FX_R</b>     | 1.33           | 1.06          | 1.70         | 0.007    | 0.027        | 12          | Yes                 |
| <b>ST_L</b>     | 0.76           | 0.61          | 0.97         | 0.985    | 0.985        | 45          | No                  |
| <b>ST_R</b>     | 0.89           | 0.71          | 1.14         | 0.819    | 0.837        | 44          | No                  |
| <b>UF_L</b>     | 1.16           | 0.92          | 1.48         | 0.108    | 0.167        | 29          | No                  |
| <b>UF_R</b>     | 1.50           | 1.19          | 1.92         | <0.001   | 0.002        | 6           | Yes                 |
| <b>IFOF_L</b>   | 1.23           | 0.98          | 1.57         | 0.039    | 0.083        | 21          | No                  |
| <b>IFOF_R</b>   | 1.47           | 1.17          | 1.88         | <0.001   | 0.003        | 7           | Yes                 |
| <b>ILF_L</b>    | 0.99           | 0.79          | 1.27         | 0.527    | 0.593        | 40          | No                  |
| <b>ILF_R</b>    | 1.05           | 0.84          | 1.35         | 0.324    | 0.394        | 37          | No                  |
| <b>FS_PFC_L</b> | 1.24           | 0.98          | 1.59         | 0.034    | 0.076        | 20          | No                  |
| <b>FS_PFC_R</b> | 1.46           | 1.16          | 1.87         | 0.001    | 0.003        | 9           | Yes                 |
| <b>FS_M_L</b>   | 1.41           | 1.12          | 1.81         | 0.001    | 0.007        | 10          | Yes                 |

|                  |      |      |      |        |        |    |     |
|------------------|------|------|------|--------|--------|----|-----|
| <b>FS_M_R</b>    | 1.17 | 0.93 | 1.50 | 0.091  | 0.151  | 27 | No  |
| <b>TR_PFC_L</b>  | 1.53 | 1.22 | 1.96 | <0.001 | 0.001  | 5  | Yes |
| <b>TR_PFC_R</b>  | 1.80 | 1.43 | 2.31 | <0.001 | <0.001 | 2  | Yes |
| <b>TR_SM_L</b>   | 1.02 | 0.81 | 1.30 | 0.433  | 0.500  | 39 | No  |
| <b>TR_SM_R</b>   | 1.10 | 0.87 | 1.40 | 0.217  | 0.305  | 32 | No  |
| <b>TR_aud_L</b>  | 1.07 | 0.85 | 1.37 | 0.269  | 0.367  | 33 | No  |
| <b>TR_aud_R</b>  | 1.06 | 0.84 | 1.36 | 0.299  | 0.385  | 35 | No  |
| <b>TR_opt_L</b>  | 0.96 | 0.76 | 1.23 | 0.619  | 0.648  | 43 | No  |
| <b>TR_opt_R</b>  | 1.15 | 0.91 | 1.47 | 0.117  | 0.170  | 31 | No  |
| <b>CST_L</b>     | 1.25 | 1.00 | 1.60 | 0.027  | 0.067  | 18 | No  |
| <b>CST_R</b>     | 1.19 | 0.94 | 1.52 | 0.073  | 0.136  | 24 | No  |
| <b>CC_PFC</b>    | 1.82 | 1.45 | 2.33 | <0.001 | <0.001 | 1  | Yes |
| <b>CC_SM</b>     | 1.76 | 1.39 | 2.25 | <0.001 | <0.001 | 3  | Yes |
| <b>CC_pariet</b> | 1.46 | 1.16 | 1.87 | 0.001  | 0.003  | 8  | Yes |
| <b>CC_temp</b>   | 1.06 | 0.84 | 1.35 | 0.311  | 0.389  | 36 | No  |
| <b>CC_splen</b>  | 1.19 | 0.94 | 1.52 | 0.070  | 0.138  | 23 | No  |

### Result S4-3: Idiosyncrasy of siblings of people with ADHD

F-ratio of siblings of people with ADHD, lower and upper bound of confidence interval. The p-value, and adjusted p-value by Benjamini correction (FDR  $q=0.05$ ), the rank of p-value, and whether the tract is significant after multiple corrections.

|          | <b>F-ratio</b> | <b>CI_low</b> | <b>CI_up</b> | <b>p</b> | <b>p_adj</b> | <b>rank</b> | <b>Significance</b> |
|----------|----------------|---------------|--------------|----------|--------------|-------------|---------------------|
| AF_L     | 0.95           | 0.73          | 1.28         | 0.619    | 0.819        | 34          | No                  |
| AF_R     | 0.88           | 0.67          | 1.17         | 0.813    | 0.892        | 41          | No                  |
| SLF1_L   | 0.91           | 0.70          | 1.22         | 0.724    | 0.835        | 39          | No                  |
| SLF1_R   | 0.66           | 0.51          | 0.89         | 0.997    | 0.997        | 45          | No                  |
| SLF2_L   | 1.20           | 0.92          | 1.60         | 0.090    | 0.289        | 14          | No                  |
| SLF2_R   | 0.94           | 0.72          | 1.26         | 0.659    | 0.824        | 36          | No                  |
| SLF3_L   | 1.34           | 1.03          | 1.79         | 0.015    | 0.347        | 2           | No                  |
| SLF3_R   | 1.11           | 0.85          | 1.49         | 0.215    | 0.460        | 21          | No                  |
| FAT_L    | 0.75           | 0.58          | 1.00         | 0.974    | 1.000        | 43          | No                  |
| FAT_R    | 0.70           | 0.53          | 0.93         | 0.993    | 1.000        | 44          | No                  |
| PF_L     | 1.08           | 0.83          | 1.44         | 0.284    | 0.581        | 22          | No                  |
| PF_R     | 0.92           | 0.70          | 1.23         | 0.717    | 0.850        | 38          | No                  |
| CGB_L    | 1.27           | 0.97          | 1.69         | 0.040    | 0.182        | 10          | No                  |
| CGB_R    | 1.33           | 1.02          | 1.77         | 0.018    | 0.200        | 4           | No                  |
| CGH_L    | 1.13           | 0.86          | 1.51         | 0.189    | 0.472        | 18          | No                  |
| CGH_R    | 1.12           | 0.86          | 1.50         | 0.193    | 0.456        | 19          | No                  |
| FX_L     | 1.11           | 0.85          | 1.49         | 0.211    | 0.475        | 20          | No                  |
| FX_R     | 1.28           | 0.98          | 1.71         | 0.034    | 0.192        | 8           | No                  |
| ST_L     | 1.03           | 0.79          | 1.38         | 0.395    | 0.711        | 25          | No                  |
| ST_R     | 1.06           | 0.81          | 1.42         | 0.326    | 0.638        | 23          | No                  |
| UF_L     | 1.21           | 0.93          | 1.62         | 0.079    | 0.272        | 13          | No                  |
| UF_R     | 1.02           | 0.78          | 1.36         | 0.440    | 0.707        | 28          | No                  |
| IFOF_L   | 1.03           | 0.79          | 1.37         | 0.412    | 0.714        | 26          | No                  |
| IFOF_R   | 1.14           | 0.87          | 1.52         | 0.171    | 0.452        | 17          | No                  |
| ILF_L    | 1.33           | 1.02          | 1.78         | 0.016    | 0.242        | 3           | No                  |
| ILF_R    | 1.30           | 1.00          | 1.73         | 0.027    | 0.244        | 5           | No                  |
| FS_PFC_L | 1.02           | 0.79          | 1.37         | 0.422    | 0.704        | 27          | No                  |
| FS_PFC_R | 1.00           | 0.77          | 1.34         | 0.491    | 0.713        | 31          | No                  |
| FS_M_L   | 1.15           | 0.88          | 1.54         | 0.149    | 0.420        | 16          | No                  |

|                  |      |      |      |       |       |    |    |
|------------------|------|------|------|-------|-------|----|----|
| <b>FS_M_R</b>    | 1.23 | 0.95 | 1.65 | 0.061 | 0.228 | 12 | No |
| <b>TR_PFC_L</b>  | 0.99 | 0.76 | 1.33 | 0.503 | 0.707 | 32 | No |
| <b>TR_PFC_R</b>  | 0.99 | 0.76 | 1.32 | 0.525 | 0.716 | 33 | No |
| <b>TR_SM_L</b>   | 0.95 | 0.73 | 1.27 | 0.634 | 0.815 | 35 | No |
| <b>TR_SM_R</b>   | 0.80 | 0.62 | 1.08 | 0.930 | 0.996 | 42 | No |
| <b>TR_aud_L</b>  | 1.18 | 0.91 | 1.58 | 0.109 | 0.327 | 15 | No |
| <b>TR_aud_R</b>  | 1.28 | 0.98 | 1.71 | 0.034 | 0.172 | 9  | No |
| <b>TR_opt_L</b>  | 0.92 | 0.71 | 1.23 | 0.710 | 0.863 | 37 | No |
| <b>TR_opt_R</b>  | 1.25 | 0.96 | 1.67 | 0.048 | 0.197 | 11 | No |
| <b>CST_L</b>     | 0.91 | 0.70 | 1.22 | 0.730 | 0.822 | 40 | No |
| <b>CST_R</b>     | 1.05 | 0.81 | 1.41 | 0.341 | 0.640 | 24 | No |
| <b>CC_PFC</b>    | 1.28 | 0.98 | 1.71 | 0.033 | 0.213 | 7  | No |
| <b>CC_SM</b>     | 1.01 | 0.78 | 1.35 | 0.457 | 0.708 | 29 | No |
| <b>CC_pariet</b> | 1.29 | 0.99 | 1.73 | 0.028 | 0.211 | 6  | No |
| <b>CC_temp</b>   | 1.00 | 0.77 | 1.34 | 0.490 | 0.736 | 30 | No |
| <b>CC_splen</b>  | 1.39 | 1.07 | 1.86 | 0.007 | 0.320 | 1  | No |

### Result S4-4: Idiosyncrasy of siblings of people with ASD

F-ratio of siblings of people with ASD, lower and upper bound of the confidence interval. The p-value, and adjusted p-value by Benjamini correction (FDR  $q=0.05$ ), the rank of p-value, and whether the tract is significant after multiple corrections.

|                 | <b>F-ratio</b> | <b>CI_low</b> | <b>CI_up</b> | <b>p</b> | <b>p_adj</b> | <b>rank</b> | <b>Significance</b> |
|-----------------|----------------|---------------|--------------|----------|--------------|-------------|---------------------|
| <b>AF_L</b>     | 1.84           | 1.33          | 2.68         | <0.001   | 0.002        | 2           | Yes                 |
| <b>AF_R</b>     | 1.43           | 1.03          | 2.07         | 0.016    | 0.089        | 8           | No                  |
| <b>SLF1_L</b>   | 1.53           | 1.10          | 2.22         | 0.005    | 0.055        | 4           | No                  |
| <b>SLF1_R</b>   | 0.99           | 0.71          | 1.43         | 0.513    | 0.577        | 40          | No                  |
| <b>SLF2_L</b>   | 1.24           | 0.90          | 1.80         | 0.098    | 0.258        | 17          | No                  |
| <b>SLF2_R</b>   | 1.11           | 0.80          | 1.62         | 0.257    | 0.398        | 29          | No                  |
| <b>SLF3_L</b>   | 1.33           | 0.96          | 1.94         | 0.041    | 0.154        | 12          | No                  |
| <b>SLF3_R</b>   | 1.07           | 0.77          | 1.55         | 0.339    | 0.462        | 33          | No                  |
| <b>FAT_L</b>    | 1.30           | 0.94          | 1.89         | 0.056    | 0.179        | 14          | No                  |
| <b>FAT_R</b>    | 1.05           | 0.76          | 1.53         | 0.373    | 0.479        | 35          | No                  |
| <b>PF_L</b>     | 0.92           | 0.66          | 1.33         | 0.667    | 0.715        | 42          | No                  |
| <b>PF_R</b>     | 1.47           | 1.06          | 2.13         | 0.010    | 0.066        | 7           | No                  |
| <b>CGB_L</b>    | 1.10           | 0.79          | 1.59         | 0.286    | 0.429        | 30          | No                  |
| <b>CGB_R</b>    | 1.17           | 0.84          | 1.69         | 0.176    | 0.331        | 24          | No                  |
| <b>CGH_L</b>    | 1.00           | 0.72          | 1.45         | 0.483    | 0.558        | 39          | No                  |
| <b>CGH_R</b>    | 1.24           | 0.89          | 1.80         | 0.102    | 0.254        | 18          | No                  |
| <b>FX_L</b>     | 0.83           | 0.60          | 1.21         | 0.837    | 0.837        | 45          | No                  |
| <b>FX_R</b>     | 1.20           | 0.87          | 1.75         | 0.131    | 0.280        | 21          | No                  |
| <b>ST_L</b>     | 0.91           | 0.66          | 1.32         | 0.684    | 0.716        | 43          | No                  |
| <b>ST_R</b>     | 1.39           | 1.00          | 2.01         | 0.025    | 0.123        | 9           | No                  |
| <b>UF_L</b>     | 1.26           | 0.91          | 1.83         | 0.081    | 0.227        | 16          | No                  |
| <b>UF_R</b>     | 0.91           | 0.66          | 1.32         | 0.688    | 0.704        | 44          | No                  |
| <b>IFOF_L</b>   | 1.37           | 0.99          | 1.99         | 0.029    | 0.118        | 11          | No                  |
| <b>IFOF_R</b>   | 1.29           | 0.93          | 1.88         | 0.062    | 0.187        | 15          | No                  |
| <b>ILF_L</b>    | 0.95           | 0.69          | 1.38         | 0.597    | 0.655        | 41          | No                  |
| <b>ILF_R</b>    | 1.23           | 0.89          | 1.79         | 0.103    | 0.243        | 19          | No                  |
| <b>FS_PFC_L</b> | 1.07           | 0.77          | 1.56         | 0.329    | 0.478        | 31          | No                  |
| <b>FS_PFC_R</b> | 1.19           | 0.86          | 1.73         | 0.148    | 0.289        | 23          | No                  |
| <b>FS_M_L</b>   | 1.01           | 0.73          | 1.47         | 0.461    | 0.560        | 37          | No                  |

|                  |      |      |      |        |       |    |     |
|------------------|------|------|------|--------|-------|----|-----|
| <b>FS_M_R</b>    | 1.32 | 0.95 | 1.91 | 0.049  | 0.169 | 13 | No  |
| <b>TR_PFC_L</b>  | 1.04 | 0.75 | 1.51 | 0.398  | 0.498 | 36 | No  |
| <b>TR_PFC_R</b>  | 1.05 | 0.76 | 1.53 | 0.368  | 0.487 | 34 | No  |
| <b>TR_SM_L</b>   | 1.07 | 0.77 | 1.56 | 0.333  | 0.468 | 32 | No  |
| <b>TR_SM_R</b>   | 1.15 | 0.83 | 1.67 | 0.202  | 0.325 | 28 | No  |
| <b>TR_aud_L</b>  | 1.16 | 0.84 | 1.69 | 0.183  | 0.329 | 25 | No  |
| <b>TR_aud_R</b>  | 1.20 | 0.86 | 1.74 | 0.140  | 0.287 | 22 | No  |
| <b>TR_opt_L</b>  | 1.52 | 1.10 | 2.21 | 0.006  | 0.050 | 5  | No  |
| <b>TR_opt_R</b>  | 1.15 | 0.83 | 1.67 | 0.201  | 0.334 | 27 | No  |
| <b>CST_L</b>     | 1.15 | 0.83 | 1.67 | 0.201  | 0.347 | 26 | No  |
| <b>CST_R</b>     | 1.00 | 0.72 | 1.45 | 0.481  | 0.569 | 38 | No  |
| <b>CC_PFC</b>    | 1.38 | 1.00 | 2.01 | 0.026  | 0.117 | 10 | No  |
| <b>CC_SM</b>     | 1.79 | 1.29 | 2.60 | <0.001 | 0.002 | 3  | Yes |
| <b>CC_pariet</b> | 1.89 | 1.37 | 2.75 | <0.001 | 0.002 | 1  | Yes |
| <b>CC_temp</b>   | 1.47 | 1.07 | 2.14 | 0.009  | 0.070 | 6  | No  |
| <b>CC_splen</b>  | 1.21 | 0.87 | 1.76 | 0.125  | 0.282 | 20 | No  |



### Result S5-1: Idiosyncrasy of children with ADHD

F-ratio of children with ADHD, lower and upper bound of the confidence interval. The p-value and adjusted p-value by Benjamini correction (FDR  $q=0.05$ ), the rank of p-value and whether the tract is significant after multiple corrections.

|                 | <b>F-ratio</b> | <b>CI_low</b> | <b>CI_up</b> | <b>p</b> | <b>p_adj</b> | <b>rank</b> | <b>Significance</b> |
|-----------------|----------------|---------------|--------------|----------|--------------|-------------|---------------------|
| <b>AF_L</b>     | 1.33           | 1.04          | 1.74         | 0.011    | 0.237        | 2           | No                  |
| <b>AF_R</b>     | 1.14           | 0.89          | 1.49         | 0.146    | 0.549        | 12          | No                  |
| <b>SLF1_L</b>   | 1.41           | 1.11          | 1.84         | 0.003    | 0.122        | 1           | No                  |
| <b>SLF1_R</b>   | 0.95           | 0.74          | 1.24         | 0.645    | 0.853        | 34          | No                  |
| <b>SLF2_L</b>   | 1.11           | 0.86          | 1.44         | 0.211    | 0.633        | 15          | No                  |
| <b>SLF2_R</b>   | 1.00           | 0.78          | 1.31         | 0.485    | 0.872        | 25          | No                  |
| <b>SLF3_L</b>   | 1.19           | 0.93          | 1.55         | 0.085    | 0.381        | 10          | No                  |
| <b>SLF3_R</b>   | 1.08           | 0.85          | 1.41         | 0.265    | 0.701        | 17          | No                  |
| <b>FAT_L</b>    | 0.94           | 0.73          | 1.22         | 0.680    | 0.875        | 35          | No                  |
| <b>FAT_R</b>    | 0.78           | 0.61          | 1.02         | 0.965    | 0.987        | 44          | No                  |
| <b>PF_L</b>     | 0.92           | 0.72          | 1.20         | 0.729    | 0.863        | 38          | No                  |
| <b>PF_R</b>     | 1.11           | 0.87          | 1.45         | 0.195    | 0.676        | 13          | No                  |
| <b>CGB_L</b>    | 0.88           | 0.69          | 1.15         | 0.825    | 0.928        | 40          | No                  |
| <b>CGB_R</b>    | 1.19           | 0.93          | 1.55         | 0.081    | 0.455        | 8           | No                  |
| <b>CGH_L</b>    | 0.93           | 0.73          | 1.22         | 0.692    | 0.865        | 36          | No                  |
| <b>CGH_R</b>    | 0.84           | 0.66          | 1.10         | 0.894    | 0.981        | 41          | No                  |
| <b>FX_L</b>     | 1.02           | 0.80          | 1.33         | 0.419    | 0.786        | 24          | No                  |
| <b>FX_R</b>     | 1.11           | 0.87          | 1.45         | 0.196    | 0.632        | 14          | No                  |
| <b>ST_L</b>     | 0.70           | 0.55          | 0.91         | 0.996    | 0.996        | 45          | No                  |
| <b>ST_R</b>     | 0.83           | 0.65          | 1.09         | 0.910    | 0.975        | 42          | No                  |
| <b>UF_L</b>     | 1.05           | 0.82          | 1.37         | 0.340    | 0.728        | 21          | No                  |
| <b>UF_R</b>     | 1.20           | 0.94          | 1.56         | 0.074    | 0.662        | 5           | No                  |
| <b>IFOF_L</b>   | 0.96           | 0.75          | 1.25         | 0.614    | 0.838        | 33          | No                  |
| <b>IFOF_R</b>   | 1.19           | 0.93          | 1.55         | 0.082    | 0.409        | 9           | No                  |
| <b>ILF_L</b>    | 1.00           | 0.78          | 1.30         | 0.494    | 0.855        | 26          | No                  |
| <b>ILF_R</b>    | 1.22           | 0.95          | 1.59         | 0.057    | 0.640        | 4           | No                  |
| <b>FS_PFC_L</b> | 0.99           | 0.78          | 1.29         | 0.512    | 0.853        | 27          | No                  |
| <b>FS_PFC_R</b> | 0.93           | 0.73          | 1.21         | 0.707    | 0.860        | 37          | No                  |
| <b>FS_M_L</b>   | 0.98           | 0.77          | 1.28         | 0.556    | 0.808        | 31          | No                  |

|                  |      |      |      |       |       |    |    |
|------------------|------|------|------|-------|-------|----|----|
| <b>FS_M_R</b>    | 0.79 | 0.62 | 1.03 | 0.959 | 1.000 | 43 | No |
| <b>TR_PFC_L</b>  | 1.10 | 0.86 | 1.44 | 0.219 | 0.616 | 16 | No |
| <b>TR_PFC_R</b>  | 1.20 | 0.94 | 1.56 | 0.077 | 0.495 | 7  | No |
| <b>TR_SM_L</b>   | 1.05 | 0.82 | 1.38 | 0.332 | 0.746 | 20 | No |
| <b>TR_SM_R</b>   | 1.08 | 0.84 | 1.40 | 0.275 | 0.686 | 18 | No |
| <b>TR_aud_L</b>  | 1.25 | 0.98 | 1.63 | 0.036 | 0.544 | 3  | No |
| <b>TR_aud_R</b>  | 1.03 | 0.81 | 1.34 | 0.400 | 0.783 | 23 | No |
| <b>TR_opt_L</b>  | 0.92 | 0.72 | 1.20 | 0.735 | 0.848 | 39 | No |
| <b>TR_opt_R</b>  | 0.99 | 0.77 | 1.29 | 0.533 | 0.800 | 30 | No |
| <b>CST_L</b>     | 0.99 | 0.77 | 1.29 | 0.525 | 0.815 | 29 | No |
| <b>CST_R</b>     | 0.96 | 0.75 | 1.26 | 0.605 | 0.851 | 32 | No |
| <b>CC_PFC</b>    | 1.20 | 0.94 | 1.56 | 0.075 | 0.559 | 6  | No |
| <b>CC_SM</b>     | 1.07 | 0.84 | 1.40 | 0.281 | 0.666 | 19 | No |
| <b>CC_pariet</b> | 1.15 | 0.90 | 1.50 | 0.133 | 0.544 | 11 | No |
| <b>CC_temp</b>   | 1.04 | 0.81 | 1.35 | 0.377 | 0.772 | 22 | No |
| <b>CC_splen</b>  | 0.99 | 0.77 | 1.29 | 0.524 | 0.842 | 28 | No |

## Result S5-2: Idiosyncrasy of adults with ADHD

F-ratio of adults with ADHD, lower and upper bound of the confidence interval. The p-value, and adjusted p-value by Benjamini correction (FDR  $q=0.05$ ), the rank of p-value, and whether the tract is significant after multiple corrections.

|                 | <b>F-ratio</b> | <b>CI_low</b> | <b>CI_up</b> | <b>p</b> | <b>p_adj</b> | <b>rank</b> | <b>Significance</b> |
|-----------------|----------------|---------------|--------------|----------|--------------|-------------|---------------------|
| <b>AF_L</b>     | 1.29           | 1.00          | 1.70         | 0.026    | 0.073        | 16          | No                  |
| <b>AF_R</b>     | 1.27           | 0.98          | 1.68         | 0.034    | 0.082        | 19          | No                  |
| <b>SLF1_L</b>   | 1.04           | 0.81          | 1.38         | 0.369    | 0.426        | 39          | No                  |
| <b>SLF1_R</b>   | 1.09           | 0.85          | 1.45         | 0.243    | 0.304        | 36          | No                  |
| <b>SLF2_L</b>   | 1.42           | 1.10          | 1.88         | 0.003    | 0.026        | 6           | Yes                 |
| <b>SLF2_R</b>   | 1.16           | 0.90          | 1.53         | 0.132    | 0.186        | 32          | No                  |
| <b>SLF3_L</b>   | 1.48           | 1.15          | 1.96         | 0.001    | 0.014        | 4           | Yes                 |
| <b>SLF3_R</b>   | 1.16           | 0.90          | 1.53         | 0.131    | 0.190        | 31          | No                  |
| <b>FAT_L</b>    | 1.18           | 0.91          | 1.56         | 0.104    | 0.157        | 30          | No                  |
| <b>FAT_R</b>    | 1.24           | 0.96          | 1.64         | 0.047    | 0.092        | 23          | No                  |
| <b>PF_L</b>     | 0.96           | 0.74          | 1.27         | 0.606    | 0.649        | 42          | No                  |
| <b>PF_R</b>     | 1.11           | 0.86          | 1.46         | 0.218    | 0.280        | 35          | No                  |
| <b>CGB_L</b>    | 1.14           | 0.88          | 1.51         | 0.154    | 0.203        | 34          | No                  |
| <b>CGB_R</b>    | 1.26           | 0.98          | 1.67         | 0.037    | 0.083        | 20          | No                  |
| <b>CGH_L</b>    | 1.14           | 0.89          | 1.51         | 0.150    | 0.205        | 33          | No                  |
| <b>CGH_R</b>    | 1.34           | 1.03          | 1.77         | 0.013    | 0.058        | 10          | No                  |
| <b>FX_L</b>     | 1.01           | 0.78          | 1.33         | 0.463    | 0.521        | 40          | No                  |
| <b>FX_R</b>     | 0.96           | 0.74          | 1.26         | 0.619    | 0.647        | 43          | No                  |
| <b>ST_L</b>     | 0.87           | 0.67          | 1.15         | 0.839    | 0.839        | 45          | No                  |
| <b>ST_R</b>     | 0.95           | 0.74          | 1.26         | 0.634    | 0.649        | 44          | No                  |
| <b>UF_L</b>     | 1.33           | 1.03          | 1.76         | 0.015    | 0.060        | 11          | No                  |
| <b>UF_R</b>     | 1.25           | 0.97          | 1.65         | 0.043    | 0.087        | 22          | No                  |
| <b>IFOF_L</b>   | 1.23           | 0.96          | 1.63         | 0.054    | 0.097        | 25          | No                  |
| <b>IFOF_R</b>   | 1.19           | 0.92          | 1.57         | 0.095    | 0.148        | 29          | No                  |
| <b>ILF_L</b>    | 1.19           | 0.92          | 1.58         | 0.090    | 0.144        | 28          | No                  |
| <b>ILF_R</b>    | 1.24           | 0.96          | 1.64         | 0.049    | 0.093        | 24          | No                  |
| <b>FS_PFC_L</b> | 1.30           | 1.01          | 1.72         | 0.023    | 0.068        | 15          | No                  |
| <b>FS_PFC_R</b> | 1.36           | 1.05          | 1.80         | 0.009    | 0.045        | 9           | Yes                 |
| <b>FS_M_L</b>   | 1.52           | 1.18          | 2.01         | 0.001    | 0.012        | 2           | Yes                 |

|                  |      |      |      |        |       |    |     |
|------------------|------|------|------|--------|-------|----|-----|
| <b>FS_M_R</b>    | 1.33 | 1.03 | 1.75 | 0.015  | 0.057 | 12 | No  |
| <b>TR_PFC_L</b>  | 1.27 | 0.98 | 1.68 | 0.034  | 0.085 | 18 | No  |
| <b>TR_PFC_R</b>  | 1.44 | 1.12 | 1.90 | 0.002  | 0.022 | 5  | Yes |
| <b>TR_SM_L</b>   | 1.09 | 0.85 | 1.44 | 0.248  | 0.301 | 37 | No  |
| <b>TR_SM_R</b>   | 1.26 | 0.97 | 1.66 | 0.040  | 0.086 | 21 | No  |
| <b>TR_aud_L</b>  | 1.37 | 1.06 | 1.81 | 0.008  | 0.043 | 8  | Yes |
| <b>TR_aud_R</b>  | 1.22 | 0.94 | 1.61 | 0.068  | 0.117 | 26 | No  |
| <b>TR_opt_L</b>  | 1.08 | 0.84 | 1.43 | 0.270  | 0.320 | 38 | No  |
| <b>TR_opt_R</b>  | 1.21 | 0.94 | 1.60 | 0.070  | 0.116 | 27 | No  |
| <b>CST_L</b>     | 1.31 | 1.02 | 1.73 | 0.019  | 0.065 | 13 | No  |
| <b>CST_R</b>     | 1.53 | 1.18 | 2.02 | <0.001 | 0.022 | 1  | Yes |
| <b>CC_PFC</b>    | 1.30 | 1.01 | 1.72 | 0.021  | 0.067 | 14 | No  |
| <b>CC_SM</b>     | 1.38 | 1.07 | 1.83 | 0.006  | 0.040 | 7  | Yes |
| <b>CC_pariet</b> | 1.52 | 1.18 | 2.01 | 0.001  | 0.008 | 3  | Yes |
| <b>CC_temp</b>   | 1.27 | 0.99 | 1.68 | 0.032  | 0.085 | 17 | No  |
| <b>CC_splen</b>  | 0.99 | 0.77 | 1.31 | 0.505  | 0.554 | 41 | No  |

### Result S5-3: Idiosyncrasy of children with ASD

F-ratio of children with ASD, lower and upper bound of the confidence interval. The p-value and adjusted p-value by Benjamini correction (FDR  $q=0.05$ ), the rank of p-value, and whether the tract is significant after multiple corrections.

|                 | <b>F-ratio</b> | <b>CI_low</b> | <b>CI_up</b> | <b>p</b> | <b>p_adj</b> | <b>rank</b> | <b>Significance</b> |
|-----------------|----------------|---------------|--------------|----------|--------------|-------------|---------------------|
| <b>AF_L</b>     | 1.25           | 0.94          | 1.70         | 0.062    | 0.154        | 18          | No                  |
| <b>AF_R</b>     | 1.35           | 1.02          | 1.85         | 0.017    | 0.071        | 11          | No                  |
| <b>SLF1_L</b>   | 1.38           | 1.04          | 1.89         | 0.012    | 0.059        | 9           | No                  |
| <b>SLF1_R</b>   | 0.90           | 0.68          | 1.23         | 0.735    | 0.788        | 42          | No                  |
| <b>SLF2_L</b>   | 1.21           | 0.91          | 1.65         | 0.095    | 0.203        | 21          | No                  |
| <b>SLF2_R</b>   | 1.04           | 0.79          | 1.42         | 0.378    | 0.532        | 32          | No                  |
| <b>SLF3_L</b>   | 1.22           | 0.92          | 1.67         | 0.079    | 0.179        | 20          | No                  |
| <b>SLF3_R</b>   | 1.06           | 0.80          | 1.45         | 0.337    | 0.505        | 30          | No                  |
| <b>FAT_L</b>    | 1.20           | 0.90          | 1.63         | 0.105    | 0.206        | 23          | No                  |
| <b>FAT_R</b>    | 1.04           | 0.79          | 1.42         | 0.383    | 0.522        | 33          | No                  |
| <b>PF_L</b>     | 1.16           | 0.88          | 1.59         | 0.146    | 0.273        | 24          | No                  |
| <b>PF_R</b>     | 1.14           | 0.86          | 1.56         | 0.172    | 0.310        | 25          | No                  |
| <b>CGB_L</b>    | 1.01           | 0.77          | 1.39         | 0.447    | 0.559        | 36          | No                  |
| <b>CGB_R</b>    | 1.39           | 1.05          | 1.90         | 0.010    | 0.059        | 8           | No                  |
| <b>CGH_L</b>    | 0.97           | 0.74          | 1.33         | 0.558    | 0.643        | 39          | No                  |
| <b>CGH_R</b>    | 1.07           | 0.81          | 1.46         | 0.318    | 0.512        | 28          | No                  |
| <b>FX_L</b>     | 1.45           | 1.10          | 1.99         | 0.004    | 0.027        | 7           | Yes                 |
| <b>FX_R</b>     | 1.51           | 1.14          | 2.06         | 0.002    | 0.021        | 4           | Yes                 |
| <b>ST_L</b>     | 0.74           | 0.56          | 1.01         | 0.970    | 0.970        | 45          | No                  |
| <b>ST_R</b>     | 0.98           | 0.74          | 1.33         | 0.551    | 0.652        | 38          | No                  |
| <b>UF_L</b>     | 1.00           | 0.76          | 1.37         | 0.486    | 0.591        | 37          | No                  |
| <b>UF_R</b>     | 1.32           | 1.00          | 1.80         | 0.026    | 0.091        | 13          | No                  |
| <b>IFOF_L</b>   | 1.29           | 0.97          | 1.76         | 0.038    | 0.121        | 14          | No                  |
| <b>IFOF_R</b>   | 1.50           | 1.13          | 2.05         | 0.002    | 0.019        | 5           | Yes                 |
| <b>ILF_L</b>    | 0.97           | 0.73          | 1.32         | 0.568    | 0.639        | 40          | No                  |
| <b>ILF_R</b>    | 1.02           | 0.77          | 1.39         | 0.435    | 0.560        | 35          | No                  |
| <b>FS_PFC_L</b> | 1.26           | 0.95          | 1.72         | 0.054    | 0.163        | 15          | No                  |
| <b>FS_PFC_R</b> | 1.57           | 1.19          | 2.15         | 0.001    | 0.010        | 3           | Yes                 |
| <b>FS_M_L</b>   | 1.25           | 0.95          | 1.71         | 0.058    | 0.164        | 16          | No                  |

|                  |      |      |      |        |        |    |     |
|------------------|------|------|------|--------|--------|----|-----|
| <b>FS_M_R</b>    | 0.84 | 0.64 | 1.15 | 0.857  | 0.876  | 44 | No  |
| <b>TR_PFC_L</b>  | 1.34 | 1.02 | 1.84 | 0.019  | 0.073  | 12 | No  |
| <b>TR_PFC_R</b>  | 1.80 | 1.36 | 2.45 | <0.001 | <0.001 | 2  | Yes |
| <b>TR_SM_L</b>   | 0.97 | 0.73 | 1.32 | 0.577  | 0.634  | 41 | No  |
| <b>TR_SM_R</b>   | 1.13 | 0.85 | 1.54 | 0.201  | 0.348  | 26 | No  |
| <b>TR_aud_L</b>  | 1.04 | 0.79 | 1.43 | 0.373  | 0.542  | 31 | No  |
| <b>TR_aud_R</b>  | 0.90 | 0.68 | 1.23 | 0.751  | 0.786  | 43 | No  |
| <b>TR_opt_L</b>  | 1.02 | 0.77 | 1.40 | 0.428  | 0.567  | 34 | No  |
| <b>TR_opt_R</b>  | 1.07 | 0.81 | 1.46 | 0.311  | 0.518  | 27 | No  |
| <b>CST_L</b>     | 1.23 | 0.93 | 1.68 | 0.074  | 0.176  | 19 | No  |
| <b>CST_R</b>     | 1.20 | 0.91 | 1.64 | 0.098  | 0.200  | 22 | No  |
| <b>CC_PFC</b>    | 1.88 | 1.42 | 2.56 | <0.001 | <0.001 | 1  | Yes |
| <b>CC_SM</b>     | 1.48 | 1.12 | 2.03 | 0.003  | 0.021  | 6  | Yes |
| <b>CC_pariet</b> | 1.36 | 1.02 | 1.85 | 0.016  | 0.074  | 10 | No  |
| <b>CC_temp</b>   | 1.06 | 0.80 | 1.45 | 0.329  | 0.510  | 29 | No  |
| <b>CC_splen</b>  | 1.25 | 0.94 | 1.71 | 0.060  | 0.158  | 17 | No  |

### Result S5-4: Idiosyncrasy of adults with ASD

F-ratio of adults with ASD, lower and upper bound of the confidence interval. The p value and adjusted p-value by Benjamini correction (FDR  $q=0.05$ ), the rank of p-value, and whether the tract is significant after multiple corrections.

|                 | <b>F-ratio</b> | <b>CI_low</b> | <b>CI_up</b> | <b>pvalue</b> | <b>p_corrected</b> | <b>rank</b> | <b>pass</b> |
|-----------------|----------------|---------------|--------------|---------------|--------------------|-------------|-------------|
| <b>AF_L</b>     | 1.09           | 0.79          | 1.59         | 0.292         | 0.398              | 33          | No          |
| <b>AF_R</b>     | 1.15           | 0.83          | 1.68         | 0.195         | 0.314              | 28          | No          |
| <b>SLF1_L</b>   | 1.89           | 1.36          | 2.76         | <0.001        | 0.001              | 2           | Yes         |
| <b>SLF1_R</b>   | 1.07           | 0.77          | 1.56         | 0.337         | 0.433              | 35          | No          |
| <b>SLF2_L</b>   | 1.38           | 0.99          | 2.01         | 0.028         | 0.078              | 16          | No          |
| <b>SLF2_R</b>   | 1.44           | 1.04          | 2.10         | 0.014         | 0.053              | 12          | No          |
| <b>SLF3_L</b>   | 1.47           | 1.06          | 2.14         | 0.010         | 0.043              | 11          | Yes         |
| <b>SLF3_R</b>   | 1.11           | 0.80          | 1.62         | 0.261         | 0.392              | 30          | No          |
| <b>FAT_L</b>    | 1.37           | 0.99          | 2.00         | 0.029         | 0.073              | 18          | No          |
| <b>FAT_R</b>    | 1.38           | 0.99          | 2.01         | 0.028         | 0.074              | 17          | No          |
| <b>PF_L</b>     | 0.90           | 0.65          | 1.31         | 0.702         | 0.752              | 42          | No          |
| <b>PF_R</b>     | 1.16           | 0.84          | 1.69         | 0.182         | 0.315              | 26          | No          |
| <b>CGB_L</b>    | 1.44           | 1.04          | 2.09         | 0.015         | 0.051              | 13          | No          |
| <b>CGB_R</b>    | 1.41           | 1.02          | 2.06         | 0.019         | 0.061              | 14          | No          |
| <b>CGH_L</b>    | 0.99           | 0.71          | 1.44         | 0.506         | 0.570              | 40          | No          |
| <b>CGH_R</b>    | 1.52           | 1.09          | 2.21         | 0.006         | 0.027              | 10          | Yes         |
| <b>FX_L</b>     | 1.13           | 0.82          | 1.65         | 0.228         | 0.354              | 29          | No          |
| <b>FX_R</b>     | 1.08           | 0.78          | 1.57         | 0.320         | 0.424              | 34          | No          |
| <b>ST_L</b>     | 0.74           | 0.53          | 1.08         | 0.942         | 0.964              | 44          | No          |
| <b>ST_R</b>     | 0.73           | 0.53          | 1.06         | 0.950         | 0.950              | 45          | No          |
| <b>UF_L</b>     | 1.38           | 0.99          | 2.01         | 0.027         | 0.081              | 15          | No          |
| <b>UF_R</b>     | 1.69           | 1.22          | 2.47         | 0.001         | 0.005              | 6           | Yes         |
| <b>IFOF_L</b>   | 1.16           | 0.84          | 1.69         | 0.187         | 0.311              | 27          | No          |
| <b>IFOF_R</b>   | 1.37           | 0.99          | 1.99         | 0.031         | 0.073              | 19          | No          |
| <b>ILF_L</b>    | 0.94           | 0.68          | 1.37         | 0.619         | 0.679              | 41          | No          |
| <b>ILF_R</b>    | 1.05           | 0.76          | 1.53         | 0.374         | 0.431              | 39          | No          |
| <b>FS_PFC_L</b> | 1.23           | 0.89          | 1.79         | 0.108         | 0.212              | 23          | No          |
| <b>FS_PFC_R</b> | 1.31           | 0.95          | 1.91         | 0.053         | 0.113              | 21          | No          |
| <b>FS_M_L</b>   | 1.67           | 1.21          | 2.44         | 0.001         | 0.006              | 7           | Yes         |

|                  |      |      |      |        |        |    |     |
|------------------|------|------|------|--------|--------|----|-----|
| <b>FS_M_R</b>    | 1.65 | 1.19 | 2.41 | 0.001  | 0.006  | 8  | Yes |
| <b>TR_PFC_L</b>  | 1.82 | 1.32 | 2.66 | <0.001 | 0.001  | 4  | Yes |
| <b>TR_PFC_R</b>  | 1.83 | 1.32 | 2.66 | <0.001 | 0.002  | 3  | Yes |
| <b>TR_SM_L</b>   | 1.10 | 0.79 | 1.60 | 0.277  | 0.390  | 32 | No  |
| <b>TR_SM_R</b>   | 1.07 | 0.77 | 1.55 | 0.340  | 0.426  | 36 | No  |
| <b>TR_aud_L</b>  | 1.06 | 0.77 | 1.55 | 0.351  | 0.416  | 38 | No  |
| <b>TR_aud_R</b>  | 1.32 | 0.95 | 1.93 | 0.048  | 0.107  | 20 | No  |
| <b>TR_opt_L</b>  | 0.88 | 0.63 | 1.28 | 0.745  | 0.780  | 43 | No  |
| <b>TR_opt_R</b>  | 1.16 | 0.84 | 1.70 | 0.181  | 0.325  | 25 | No  |
| <b>CST_L</b>     | 1.31 | 0.94 | 1.90 | 0.055  | 0.112  | 22 | No  |
| <b>CST_R</b>     | 1.18 | 0.85 | 1.72 | 0.163  | 0.305  | 24 | No  |
| <b>CC_PFC</b>    | 1.76 | 1.27 | 2.56 | <0.001 | 0.003  | 5  | Yes |
| <b>CC_SM</b>     | 2.08 | 1.50 | 3.03 | <0.001 | <0.001 | 1  | Yes |
| <b>CC_pariet</b> | 1.62 | 1.17 | 2.37 | 0.002  | 0.008  | 9  | Yes |
| <b>CC_temp</b>   | 1.06 | 0.77 | 1.55 | 0.348  | 0.423  | 37 | No  |
| <b>CC_splen</b>  | 1.11 | 0.80 | 1.62 | 0.262  | 0.381  | 31 | No  |



## Result S6-1: Mean deviation difference in people with ADHD and people with ASD

The effect size of two-sample t-test of deviation of people with ADHD and people with ASD, lower and upper bound of the confidence interval. The t-statistics, p-value, and adjusted p-value by Benjamini correction (FDR  $q=0.05$ ), the rank of p-value and whether the tract is significant after multiple corrections.

|          | ES    | CI_low | CI_up | t     | p     | p_adj | rank | Significance |
|----------|-------|--------|-------|-------|-------|-------|------|--------------|
| AF_L     | 0.12  | -0.07  | 0.31  | 1.21  | 0.226 | 0.849 | 12   | No           |
| AF_R     | 0.04  | -0.14  | 0.23  | 0.47  | 0.641 | 0.801 | 36   | No           |
| SLF1_L   | -0.02 | -0.21  | 0.17  | -0.25 | 0.805 | 0.884 | 41   | No           |
| SLF1_R   | -0.15 | -0.34  | 0.04  | -1.60 | 0.111 | 0.829 | 6    | No           |
| SLF2_L   | 0.11  | -0.08  | 0.30  | 1.18  | 0.239 | 0.826 | 13   | No           |
| SLF2_R   | 0.10  | -0.09  | 0.29  | 1.03  | 0.305 | 0.807 | 17   | No           |
| SLF3_L   | 0.09  | -0.10  | 0.28  | 0.94  | 0.348 | 0.783 | 20   | No           |
| SLF3_R   | 0.13  | -0.06  | 0.31  | 1.30  | 0.194 | 0.873 | 10   | No           |
| FAT_L    | 0.26  | 0.07   | 0.45  | 2.72  | 0.007 | 0.151 | 2    | No           |
| FAT_R    | 0.05  | -0.14  | 0.24  | 0.55  | 0.582 | 0.819 | 32   | No           |
| PF_L     | 0.15  | -0.04  | 0.33  | 1.51  | 0.132 | 0.744 | 8    | No           |
| PF_R     | 0.08  | -0.10  | 0.27  | 0.87  | 0.383 | 0.783 | 22   | No           |
| CGB_L    | 0.12  | -0.07  | 0.31  | 1.27  | 0.204 | 0.833 | 11   | No           |
| CGB_R    | 0.09  | -0.10  | 0.28  | 0.95  | 0.340 | 0.806 | 19   | No           |
| CGH_L    | 0.08  | -0.11  | 0.26  | 0.78  | 0.434 | 0.782 | 25   | No           |
| CGH_R    | 0.11  | -0.08  | 0.30  | 1.17  | 0.242 | 0.779 | 14   | No           |
| FX_L     | 0.03  | -0.16  | 0.22  | 0.35  | 0.726 | 0.838 | 39   | No           |
| FX_R     | 0.13  | -0.05  | 0.32  | 1.40  | 0.162 | 0.811 | 9    | No           |
| ST_L     | 0.07  | -0.12  | 0.26  | 0.72  | 0.474 | 0.761 | 28   | No           |
| ST_R     | -0.03 | -0.22  | 0.16  | -0.33 | 0.742 | 0.834 | 40   | No           |
| UF_L     | 0.18  | -0.01  | 0.37  | 1.89  | 0.059 | 0.666 | 4    | No           |
| UF_R     | 0.15  | -0.04  | 0.34  | 1.58  | 0.115 | 0.738 | 7    | No           |
| IFOF_L   | 0.09  | -0.10  | 0.28  | 0.97  | 0.334 | 0.836 | 18   | No           |
| IFOF_R   | 0.06  | -0.13  | 0.25  | 0.64  | 0.523 | 0.760 | 31   | No           |
| ILF_L    | 0.01  | -0.18  | 0.20  | 0.09  | 0.931 | 0.975 | 43   | No           |
| ILF_R    | 0.10  | -0.09  | 0.29  | 1.08  | 0.283 | 0.848 | 15   | No           |
| FS_PFC_L | 0.10  | -0.09  | 0.29  | 1.06  | 0.290 | 0.816 | 16   | No           |
| FS_PFC_R | 0.07  | -0.12  | 0.26  | 0.75  | 0.454 | 0.757 | 27   | No           |

|                  |       |       |      |       |        |       |    |     |
|------------------|-------|-------|------|-------|--------|-------|----|-----|
| <b>FS_M_L</b>    | -0.07 | -0.26 | 0.12 | -0.69 | 0.489  | 0.759 | 29 | No  |
| <b>FS_M_R</b>    | -0.07 | -0.26 | 0.12 | -0.76 | 0.446  | 0.771 | 26 | No  |
| <b>TR_PFC_L</b>  | 0.08  | -0.11 | 0.27 | 0.80  | 0.426  | 0.800 | 24 | No  |
| <b>TR_PFC_R</b>  | 0.08  | -0.10 | 0.27 | 0.87  | 0.383  | 0.749 | 23 | No  |
| <b>TR_SM_L</b>   | -0.07 | -0.25 | 0.12 | -0.68 | 0.499  | 0.748 | 30 | No  |
| <b>TR_SM_R</b>   | -0.05 | -0.24 | 0.14 | -0.54 | 0.586  | 0.799 | 33 | No  |
| <b>TR_aud_L</b>  | 0.05  | -0.14 | 0.24 | 0.49  | 0.623  | 0.824 | 34 | No  |
| <b>TR_aud_R</b>  | -0.02 | -0.21 | 0.17 | -0.21 | 0.835  | 0.895 | 42 | No  |
| <b>TR_opt_L</b>  | -0.03 | -0.22 | 0.15 | -0.36 | 0.717  | 0.849 | 38 | No  |
| <b>TR_opt_R</b>  | 0.00  | -0.19 | 0.19 | 0.02  | 0.984  | 0.984 | 45 | No  |
| <b>CST_L</b>     | -0.16 | -0.35 | 0.03 | -1.67 | 0.095  | 0.857 | 5  | No  |
| <b>CST_R</b>     | -0.18 | -0.37 | 0.00 | -1.91 | 0.056  | 0.844 | 3  | No  |
| <b>CC_PFC</b>    | 0.36  | 0.17  | 0.55 | 3.74  | <0.001 | 0.009 | 1  | Yes |
| <b>CC_SM</b>     | 0.05  | -0.14 | 0.24 | 0.48  | 0.629  | 0.808 | 35 | No  |
| <b>CC_pariet</b> | 0.01  | -0.18 | 0.20 | 0.08  | 0.939  | 0.960 | 44 | No  |
| <b>CC_temp</b>   | 0.04  | -0.15 | 0.23 | 0.41  | 0.682  | 0.829 | 37 | No  |
| <b>CC_splen</b>  | -0.09 | -0.28 | 0.10 | -0.90 | 0.369  | 0.791 | 21 | No  |

## Result S6-2: Mean deviation difference in people with ADHD and siblings of people with ADHD

The effect size of two-sample t-test of deviation of people with ADHD and siblings of people with ADHD, lower and upper bound of the confidence interval. The t-statistics, p-value, and adjusted p-value by Benjamini correction (FDR  $q=0.05$ ), the rank of p-value and whether the tract is significant after multiple corrections.

|          | ES    | CI_low | CI_up | t     | p     | p_adj | rank | Significance |
|----------|-------|--------|-------|-------|-------|-------|------|--------------|
| AF_L     | -0.22 | -0.44  | -0.01 | -2.06 | 0.040 | 0.597 | 3    | No           |
| AF_R     | -0.12 | -0.34  | 0.09  | -1.13 | 0.257 | 0.482 | 24   | No           |
| SLF1_L   | -0.12 | -0.33  | 0.10  | -1.09 | 0.278 | 0.481 | 26   | No           |
| SLF1_R   | -0.22 | -0.43  | 0.00  | -2.01 | 0.045 | 0.510 | 4    | No           |
| SLF2_L   | -0.07 | -0.29  | 0.14  | -0.66 | 0.510 | 0.656 | 35   | No           |
| SLF2_R   | -0.13 | -0.34  | 0.08  | -1.20 | 0.229 | 0.469 | 22   | No           |
| SLF3_L   | -0.06 | -0.27  | 0.15  | -0.56 | 0.576 | 0.683 | 38   | No           |
| SLF3_R   | -0.07 | -0.29  | 0.14  | -0.69 | 0.492 | 0.671 | 33   | No           |
| FAT_L    | -0.14 | -0.36  | 0.07  | -1.32 | 0.189 | 0.473 | 18   | No           |
| FAT_R    | -0.06 | -0.28  | 0.15  | -0.59 | 0.553 | 0.672 | 37   | No           |
| PF_L     | -0.10 | -0.31  | 0.12  | -0.90 | 0.367 | 0.550 | 30   | No           |
| PF_R     | -0.13 | -0.35  | 0.08  | -1.21 | 0.226 | 0.484 | 21   | No           |
| CGB_L    | -0.10 | -0.31  | 0.11  | -0.93 | 0.355 | 0.570 | 28   | No           |
| CGB_R    | -0.17 | -0.38  | 0.05  | -1.54 | 0.125 | 0.401 | 14   | No           |
| CGH_L    | -0.02 | -0.23  | 0.20  | -0.15 | 0.879 | 0.965 | 41   | No           |
| CGH_R    | -0.15 | -0.37  | 0.06  | -1.41 | 0.159 | 0.421 | 17   | No           |
| FX_L     | -0.02 | -0.23  | 0.20  | -0.14 | 0.887 | 0.929 | 43   | No           |
| FX_R     | -0.02 | -0.23  | 0.20  | -0.15 | 0.882 | 0.945 | 42   | No           |
| ST_L     | -0.14 | -0.35  | 0.08  | -1.24 | 0.216 | 0.485 | 20   | No           |
| ST_R     | -0.08 | -0.29  | 0.14  | -0.70 | 0.483 | 0.680 | 32   | No           |
| UF_L     | -0.20 | -0.41  | 0.02  | -1.81 | 0.070 | 0.396 | 8    | No           |
| UF_R     | -0.10 | -0.31  | 0.11  | -0.92 | 0.358 | 0.555 | 29   | No           |
| IFOF_L   | -0.21 | -0.42  | 0.00  | -1.93 | 0.054 | 0.404 | 6    | No           |
| IFOF_R   | -0.04 | -0.26  | 0.17  | -0.41 | 0.682 | 0.787 | 39   | No           |
| ILF_L    | -0.14 | -0.35  | 0.07  | -1.29 | 0.196 | 0.465 | 19   | No           |
| ILF_R    | -0.09 | -0.30  | 0.13  | -0.79 | 0.428 | 0.622 | 31   | No           |
| FS_PFC_L | -0.16 | -0.37  | 0.06  | -1.45 | 0.147 | 0.414 | 16   | No           |

|                  |       |       |       |       |       |       |    |    |
|------------------|-------|-------|-------|-------|-------|-------|----|----|
| <b>FS_PFC_R</b>  | -0.13 | -0.34 | 0.08  | -1.20 | 0.230 | 0.450 | 23 | No |
| <b>FS_M_L</b>    | -0.01 | -0.22 | 0.20  | -0.09 | 0.928 | 0.928 | 45 | No |
| <b>FS_M_R</b>    | -0.12 | -0.33 | 0.09  | -1.09 | 0.274 | 0.494 | 25 | No |
| <b>TR_PFC_L</b>  | -0.28 | -0.50 | -0.07 | -2.61 | 0.009 | 0.427 | 1  | No |
| <b>TR_PFC_R</b>  | -0.19 | -0.40 | 0.03  | -1.72 | 0.086 | 0.353 | 11 | No |
| <b>TR_SM_L</b>   | -0.07 | -0.28 | 0.15  | -0.62 | 0.536 | 0.670 | 36 | No |
| <b>TR_SM_R</b>   | -0.03 | -0.24 | 0.19  | -0.26 | 0.795 | 0.894 | 40 | No |
| <b>TR_aud_L</b>  | -0.25 | -0.46 | -0.03 | -2.28 | 0.023 | 0.523 | 2  | No |
| <b>TR_aud_R</b>  | -0.19 | -0.40 | 0.02  | -1.74 | 0.082 | 0.411 | 9  | No |
| <b>TR_opt_L</b>  | -0.18 | -0.39 | 0.04  | -1.64 | 0.103 | 0.355 | 13 | No |
| <b>TR_opt_R</b>  | 0.01  | -0.20 | 0.22  | 0.10  | 0.924 | 0.945 | 44 | No |
| <b>CST_L</b>     | -0.18 | -0.40 | 0.03  | -1.67 | 0.096 | 0.361 | 12 | No |
| <b>CST_R</b>     | -0.21 | -0.43 | 0.00  | -1.96 | 0.050 | 0.454 | 5  | No |
| <b>CC_PFC</b>    | -0.07 | -0.29 | 0.14  | -0.67 | 0.504 | 0.667 | 34 | No |
| <b>CC_SM</b>     | -0.11 | -0.33 | 0.10  | -1.03 | 0.301 | 0.502 | 27 | No |
| <b>CC_pariet</b> | -0.19 | -0.40 | 0.03  | -1.73 | 0.084 | 0.378 | 10 | No |
| <b>CC_temp</b>   | -0.21 | -0.42 | 0.00  | -1.93 | 0.055 | 0.352 | 7  | No |
| <b>CC_splen</b>  | -0.16 | -0.38 | 0.05  | -1.48 | 0.139 | 0.417 | 15 | No |

### Result S6-3: Mean deviation difference in people with ASD and siblings of people with ASD

The effect size of the two-sample t-test of deviation of people with ASD and siblings of people with ASD, lower and upper bound of the confidence interval. The t-statistics, p-value, and adjusted p-value by Benjamini correction (FDR  $q=0.05$ ), the rank of p-value, and whether the tract is significant after multiple corrections.

|          | ES    | CI_low | CI_up | t     | p     | p_adj | rank | Significance |
|----------|-------|--------|-------|-------|-------|-------|------|--------------|
| AF_L     | -0.14 | -0.42  | 0.13  | -1.01 | 0.316 | 1.000 | 10   | No           |
| AF_R     | -0.05 | -0.32  | 0.23  | -0.34 | 0.735 | 1.000 | 33   | No           |
| SLF1_L   | 0.09  | -0.18  | 0.37  | 0.65  | 0.515 | 1.000 | 18   | No           |
| SLF1_R   | 0.06  | -0.21  | 0.34  | 0.45  | 0.655 | 1.000 | 26   | No           |
| SLF2_L   | 0.08  | -0.20  | 0.35  | 0.55  | 0.582 | 1.000 | 22   | No           |
| SLF2_R   | 0.18  | -0.09  | 0.46  | 1.31  | 0.190 | 1.000 | 5    | No           |
| SLF3_L   | 0.08  | -0.20  | 0.35  | 0.55  | 0.581 | 1.000 | 21   | No           |
| SLF3_R   | -0.05 | -0.32  | 0.23  | -0.34 | 0.732 | 1.000 | 32   | No           |
| FAT_L    | 0.08  | -0.19  | 0.36  | 0.60  | 0.549 | 1.000 | 19   | No           |
| FAT_R    | 0.13  | -0.15  | 0.40  | 0.92  | 0.359 | 1.000 | 11   | No           |
| PF_L     | -0.17 | -0.44  | 0.10  | -1.21 | 0.226 | 1.000 | 6    | No           |
| PF_R     | 0.11  | -0.17  | 0.38  | 0.77  | 0.444 | 1.000 | 14   | No           |
| CGB_L    | -0.04 | -0.31  | 0.24  | -0.28 | 0.783 | 0.952 | 37   | No           |
| CGB_R    | 0.02  | -0.25  | 0.29  | 0.14  | 0.889 | 0.976 | 41   | No           |
| CGH_L    | 0.11  | -0.16  | 0.39  | 0.79  | 0.428 | 1.000 | 13   | No           |
| CGH_R    | -0.02 | -0.30  | 0.25  | -0.18 | 0.860 | 0.993 | 39   | No           |
| FX_L     | -0.21 | -0.49  | 0.06  | -1.50 | 0.134 | 1.000 | 2    | No           |
| FX_R     | -0.06 | -0.33  | 0.22  | -0.40 | 0.692 | 1.000 | 28   | No           |
| ST_L     | -0.19 | -0.46  | 0.09  | -1.35 | 0.179 | 1.000 | 4    | No           |
| ST_R     | -0.01 | -0.28  | 0.27  | -0.04 | 0.971 | 0.971 | 45   | No           |
| UF_L     | -0.05 | -0.33  | 0.22  | -0.37 | 0.711 | 1.000 | 30   | No           |
| UF_R     | -0.16 | -0.43  | 0.12  | -1.12 | 0.262 | 1.000 | 7    | No           |
| IFOF_L   | 0.04  | -0.23  | 0.32  | 0.29  | 0.771 | 0.964 | 36   | No           |
| IFOF_R   | 0.10  | -0.17  | 0.37  | 0.71  | 0.477 | 1.000 | 15   | No           |
| ILF_L    | 0.07  | -0.20  | 0.34  | 0.50  | 0.620 | 1.000 | 24   | No           |
| ILF_R    | -0.08 | -0.35  | 0.19  | -0.57 | 0.570 | 1.000 | 20   | No           |
| FS_PFC_L | 0.12  | -0.16  | 0.39  | 0.83  | 0.408 | 1.000 | 12   | No           |

|                  |       |       |      |       |       |       |    |    |
|------------------|-------|-------|------|-------|-------|-------|----|----|
| <b>FS_PFC_R</b>  | 0.14  | -0.13 | 0.42 | 1.03  | 0.306 | 1.000 | 9  | No |
| <b>FS_M_L</b>    | 0.06  | -0.22 | 0.33 | 0.40  | 0.687 | 1.000 | 27 | No |
| <b>FS_M_R</b>    | -0.02 | -0.30 | 0.25 | -0.17 | 0.868 | 0.977 | 40 | No |
| <b>TR_PFC_L</b>  | 0.05  | -0.22 | 0.33 | 0.39  | 0.696 | 1.000 | 29 | No |
| <b>TR_PFC_R</b>  | 0.03  | -0.24 | 0.31 | 0.23  | 0.815 | 0.966 | 38 | No |
| <b>TR_SM_L</b>   | 0.23  | -0.05 | 0.50 | 1.61  | 0.109 | 1.000 | 1  | No |
| <b>TR_SM_R</b>   | 0.02  | -0.25 | 0.29 | 0.14  | 0.889 | 0.953 | 42 | No |
| <b>TR_aud_L</b>  | 0.05  | -0.22 | 0.33 | 0.36  | 0.717 | 1.000 | 31 | No |
| <b>TR_aud_R</b>  | -0.20 | -0.48 | 0.07 | -1.45 | 0.149 | 1.000 | 3  | No |
| <b>TR_opt_L</b>  | -0.01 | -0.29 | 0.26 | -0.08 | 0.938 | 0.959 | 44 | No |
| <b>TR_opt_R</b>  | -0.09 | -0.37 | 0.18 | -0.66 | 0.510 | 1.000 | 17 | No |
| <b>CST_L</b>     | 0.10  | -0.18 | 0.37 | 0.70  | 0.485 | 1.000 | 16 | No |
| <b>CST_R</b>     | 0.04  | -0.23 | 0.32 | 0.32  | 0.749 | 0.991 | 34 | No |
| <b>CC_PFC</b>    | -0.07 | -0.35 | 0.20 | -0.53 | 0.596 | 1.000 | 23 | No |
| <b>CC_SM</b>     | -0.07 | -0.34 | 0.21 | -0.50 | 0.620 | 1.000 | 25 | No |
| <b>CC_pariet</b> | -0.15 | -0.42 | 0.13 | -1.06 | 0.290 | 1.000 | 8  | No |
| <b>CC_temp</b>   | -0.02 | -0.29 | 0.26 | -0.13 | 0.896 | 0.938 | 43 | No |
| <b>CC_splen</b>  | -0.04 | -0.32 | 0.23 | -0.30 | 0.767 | 0.986 | 35 | No |

### Result S6-4: Mean deviation difference in siblings of people with ADHD and siblings of people with ASD

The effect size of two-sample t-test of deviation of siblings of people with ADHD and siblings of people with ASD, lower and upper bound of the confidence interval. The t-statistics, p-value, and adjusted p-value by Benjamini correction (FDR  $q=0.05$ ), the rank of p-value, and whether the tract is significant after multiple corrections.

|          | ES    | CI_low | CI_up | t     | p     | p_adj | rank | Significance |
|----------|-------|--------|-------|-------|-------|-------|------|--------------|
| AF_L     | 0.19  | -0.10  | 0.48  | 1.26  | 0.210 | 0.410 | 23   | No           |
| AF_R     | 0.12  | -0.17  | 0.41  | 0.81  | 0.418 | 0.649 | 29   | No           |
| SLF1_L   | 0.20  | -0.09  | 0.49  | 1.34  | 0.182 | 0.391 | 21   | No           |
| SLF1_R   | 0.13  | -0.16  | 0.42  | 0.88  | 0.378 | 0.630 | 27   | No           |
| SLF2_L   | 0.27  | -0.03  | 0.56  | 1.79  | 0.075 | 0.240 | 14   | No           |
| SLF2_R   | 0.44  | 0.14   | 0.73  | 2.93  | 0.004 | 0.056 | 3    | No           |
| SLF3_L   | 0.23  | -0.07  | 0.52  | 1.53  | 0.128 | 0.339 | 17   | No           |
| SLF3_R   | 0.15  | -0.14  | 0.45  | 1.04  | 0.302 | 0.522 | 26   | No           |
| FAT_L    | 0.53  | 0.23   | 0.82  | 3.54  | 0.001 | 0.023 | 1    | Yes          |
| FAT_R    | 0.28  | -0.01  | 0.57  | 1.87  | 0.063 | 0.217 | 13   | No           |
| PF_L     | 0.07  | -0.22  | 0.36  | 0.47  | 0.640 | 0.778 | 37   | No           |
| PF_R     | 0.33  | 0.03   | 0.62  | 2.19  | 0.030 | 0.135 | 10   | No           |
| CGB_L    | 0.17  | -0.12  | 0.47  | 1.17  | 0.244 | 0.440 | 25   | No           |
| CGB_R    | 0.28  | -0.01  | 0.57  | 1.88  | 0.062 | 0.232 | 12   | No           |
| CGH_L    | 0.20  | -0.10  | 0.49  | 1.32  | 0.189 | 0.387 | 22   | No           |
| CGH_R    | 0.23  | -0.06  | 0.53  | 1.58  | 0.117 | 0.350 | 15   | No           |
| FX_L     | -0.18 | -0.47  | 0.12  | -1.18 | 0.238 | 0.447 | 24   | No           |
| FX_R     | 0.09  | -0.20  | 0.38  | 0.59  | 0.555 | 0.734 | 34   | No           |
| ST_L     | 0.02  | -0.28  | 0.31  | 0.11  | 0.911 | 0.954 | 43   | No           |
| ST_R     | 0.04  | -0.26  | 0.33  | 0.24  | 0.809 | 0.958 | 38   | No           |
| UF_L     | 0.32  | 0.03   | 0.61  | 2.16  | 0.032 | 0.131 | 11   | No           |
| UF_R     | 0.10  | -0.19  | 0.40  | 0.69  | 0.489 | 0.688 | 32   | No           |
| IFOF_L   | 0.34  | 0.04   | 0.63  | 2.27  | 0.024 | 0.121 | 9    | No           |
| IFOF_R   | 0.22  | -0.08  | 0.51  | 1.46  | 0.147 | 0.348 | 19   | No           |
| ILF_L    | 0.21  | -0.08  | 0.50  | 1.41  | 0.159 | 0.357 | 20   | No           |
| ILF_R    | 0.11  | -0.18  | 0.40  | 0.74  | 0.458 | 0.665 | 31   | No           |
| FS_PFC_L | 0.40  | 0.10   | 0.69  | 2.65  | 0.009 | 0.097 | 4    | No           |

|                  |       |       |      |       |       |       |    |    |
|------------------|-------|-------|------|-------|-------|-------|----|----|
| <b>FS_PFC_R</b>  | 0.37  | 0.08  | 0.67 | 2.51  | 0.013 | 0.116 | 5  | No |
| <b>FS_M_L</b>    | 0.00  | -0.29 | 0.29 | -0.01 | 0.995 | 0.995 | 45 | No |
| <b>FS_M_R</b>    | 0.02  | -0.27 | 0.31 | 0.13  | 0.893 | 0.957 | 42 | No |
| <b>TR_PFC_L</b>  | 0.45  | 0.16  | 0.75 | 3.03  | 0.003 | 0.063 | 2  | No |
| <b>TR_PFC_R</b>  | 0.35  | 0.05  | 0.64 | 2.34  | 0.020 | 0.113 | 8  | No |
| <b>TR_SM_L</b>   | 0.23  | -0.06 | 0.52 | 1.55  | 0.122 | 0.344 | 16 | No |
| <b>TR_SM_R</b>   | -0.01 | -0.30 | 0.29 | -0.04 | 0.965 | 0.987 | 44 | No |
| <b>TR_aud_L</b>  | 0.36  | 0.06  | 0.65 | 2.39  | 0.018 | 0.115 | 7  | No |
| <b>TR_aud_R</b>  | -0.03 | -0.32 | 0.27 | -0.18 | 0.860 | 0.944 | 41 | No |
| <b>TR_opt_L</b>  | 0.12  | -0.17 | 0.41 | 0.82  | 0.415 | 0.668 | 28 | No |
| <b>TR_opt_R</b>  | -0.10 | -0.39 | 0.19 | -0.66 | 0.510 | 0.696 | 33 | No |
| <b>CST_L</b>     | 0.12  | -0.17 | 0.41 | 0.81  | 0.419 | 0.628 | 30 | No |
| <b>CST_R</b>     | 0.07  | -0.22 | 0.37 | 0.50  | 0.616 | 0.792 | 35 | No |
| <b>CC_PFC</b>    | 0.37  | 0.07  | 0.66 | 2.47  | 0.014 | 0.107 | 6  | No |
| <b>CC_SM</b>     | 0.07  | -0.22 | 0.37 | 0.50  | 0.619 | 0.774 | 36 | No |
| <b>CC_pariet</b> | 0.03  | -0.26 | 0.32 | 0.21  | 0.837 | 0.965 | 39 | No |
| <b>CC_temp</b>   | 0.22  | -0.07 | 0.52 | 1.50  | 0.136 | 0.339 | 18 | No |
| <b>CC_splen</b>  | 0.03  | -0.26 | 0.32 | 0.20  | 0.838 | 0.943 | 40 | No |



**Result S7-1: Mean deviation difference in children with ADHD and adults with ADHD**

The effect size of two-sample t-test of deviation of children with ADHD and adults with ADHD, lower and upper bound of the confidence interval. The t-statistics, p-value, and adjusted p-value by Benjamini correction (FDR  $q=0.05$ ), the rank of p-value, and whether the tract is significant after multiple corrections.

|          | ES    | CI_low | CI_up | t     | p     | p_adj | rank | Significance |
|----------|-------|--------|-------|-------|-------|-------|------|--------------|
| AF_L     | 0.03  | -0.21  | 0.26  | 0.22  | 0.830 | 0.982 | 38   | No           |
| AF_R     | -0.20 | -0.43  | 0.04  | -1.65 | 0.101 | 0.754 | 6    | No           |
| SLF1_L   | -0.02 | -0.25  | 0.22  | -0.14 | 0.889 | 0.976 | 41   | No           |
| SLF1_R   | 0.14  | -0.10  | 0.37  | 1.16  | 0.247 | 1.000 | 10   | No           |
| SLF2_L   | -0.09 | -0.32  | 0.15  | -0.73 | 0.465 | 1.000 | 20   | No           |
| SLF2_R   | -0.10 | -0.33  | 0.14  | -0.80 | 0.424 | 1.000 | 18   | No           |
| SLF3_L   | -0.05 | -0.29  | 0.18  | -0.44 | 0.658 | 0.956 | 31   | No           |
| SLF3_R   | -0.20 | -0.43  | 0.04  | -1.63 | 0.104 | 0.668 | 7    | No           |
| FAT_L    | -0.03 | -0.26  | 0.21  | -0.22 | 0.827 | 1.000 | 37   | No           |
| FAT_R    | -0.09 | -0.33  | 0.14  | -0.79 | 0.429 | 1.000 | 19   | No           |
| PF_L     | -0.12 | -0.36  | 0.11  | -1.00 | 0.316 | 1.000 | 14   | No           |
| PF_R     | 0.03  | -0.21  | 0.26  | 0.23  | 0.822 | 1.000 | 36   | No           |
| CGB_L    | -0.12 | -0.36  | 0.11  | -1.02 | 0.307 | 1.000 | 12   | No           |
| CGB_R    | 0.12  | -0.12  | 0.35  | 0.99  | 0.325 | 0.976 | 15   | No           |
| CGH_L    | -0.32 | -0.55  | -0.08 | -2.65 | 0.008 | 0.190 | 2    | No           |
| CGH_R    | 0.07  | -0.16  | 0.31  | 0.62  | 0.539 | 1.000 | 23   | No           |
| FX_L     | 0.06  | -0.18  | 0.29  | 0.47  | 0.638 | 0.956 | 30   | No           |
| FX_R     | 0.07  | -0.17  | 0.30  | 0.56  | 0.574 | 0.957 | 27   | No           |
| ST_L     | -0.07 | -0.31  | 0.16  | -0.60 | 0.550 | 0.990 | 25   | No           |
| ST_R     | -0.33 | -0.57  | -0.09 | -2.75 | 0.006 | 0.286 | 1    | No           |
| UF_L     | -0.09 | -0.32  | 0.15  | -0.73 | 0.466 | 0.998 | 21   | No           |
| UF_R     | -0.01 | -0.25  | 0.22  | -0.11 | 0.915 | 0.981 | 42   | No           |
| IFOF_L   | -0.14 | -0.37  | 0.10  | -1.16 | 0.247 | 1.000 | 11   | No           |
| IFOF_R   | -0.06 | -0.30  | 0.17  | -0.52 | 0.605 | 0.973 | 28   | No           |
| ILF_L    | -0.25 | -0.48  | -0.01 | -2.06 | 0.040 | 0.601 | 3    | No           |
| ILF_R    | -0.16 | -0.39  | 0.08  | -1.31 | 0.191 | 1.000 | 8    | No           |
| FS_PFC_L | -0.11 | -0.35  | 0.12  | -0.93 | 0.352 | 0.991 | 16   | No           |

|                  |       |       |      |       |       |       |    |    |
|------------------|-------|-------|------|-------|-------|-------|----|----|
| <b>FS_PFC_R</b>  | 0.00  | -0.24 | 0.23 | -0.03 | 0.980 | 1.000 | 44 | No |
| <b>FS_M_L</b>    | 0.04  | -0.19 | 0.28 | 0.33  | 0.738 | 0.977 | 34 | No |
| <b>FS_M_R</b>    | -0.15 | -0.39 | 0.09 | -1.25 | 0.212 | 1.000 | 9  | No |
| <b>TR_PFC_L</b>  | -0.03 | -0.27 | 0.20 | -0.26 | 0.794 | 1.000 | 35 | No |
| <b>TR_PFC_R</b>  | 0.12  | -0.11 | 0.36 | 1.01  | 0.314 | 1.000 | 13 | No |
| <b>TR_SM_L</b>   | -0.07 | -0.31 | 0.16 | -0.61 | 0.543 | 1.000 | 24 | No |
| <b>TR_SM_R</b>   | -0.01 | -0.24 | 0.23 | -0.06 | 0.952 | 0.996 | 43 | No |
| <b>TR_aud_L</b>  | -0.07 | -0.31 | 0.16 | -0.59 | 0.559 | 0.967 | 26 | No |
| <b>TR_aud_R</b>  | 0.00  | -0.24 | 0.23 | -0.01 | 0.990 | 0.990 | 45 | No |
| <b>TR_opt_L</b>  | -0.21 | -0.44 | 0.03 | -1.74 | 0.083 | 0.749 | 5  | No |
| <b>TR_opt_R</b>  | -0.06 | -0.29 | 0.18 | -0.48 | 0.629 | 0.976 | 29 | No |
| <b>CST_L</b>     | 0.08  | -0.15 | 0.32 | 0.70  | 0.486 | 0.993 | 22 | No |
| <b>CST_R</b>     | -0.04 | -0.28 | 0.19 | -0.37 | 0.708 | 0.996 | 32 | No |
| <b>CC_PFC</b>    | 0.21  | -0.02 | 0.45 | 1.78  | 0.076 | 0.855 | 4  | No |
| <b>CC_SM</b>     | 0.11  | -0.13 | 0.34 | 0.89  | 0.374 | 0.989 | 17 | No |
| <b>CC_pariet</b> | -0.03 | -0.26 | 0.21 | -0.21 | 0.835 | 0.963 | 39 | No |
| <b>CC_temp</b>   | 0.04  | -0.19 | 0.28 | 0.34  | 0.732 | 0.998 | 33 | No |
| <b>CC_splen</b>  | 0.02  | -0.22 | 0.25 | 0.16  | 0.876 | 0.985 | 40 | No |

## Result S7-2: Mean deviation difference in children with ASD and adults with ASD

Effect size of two-sample t-test of deviation of children with ASD and adults with ASD, lower and upper bound of confidence interval. The t-statistics, p value, and adjusted p value by Benjamini correction (FDR  $q=0.05$ ), the rank of p value and whether the tract is significant after multiple corrections.

|          | ES    | CI_low | CI_up | t     | p     | p_adj | rank | pass |
|----------|-------|--------|-------|-------|-------|-------|------|------|
| AF_L     | 0.07  | -0.23  | 0.37  | 0.44  | 0.657 | 1.000 | 28   | No   |
| AF_R     | -0.01 | -0.31  | 0.29  | -0.08 | 0.940 | 0.961 | 44   | No   |
| SLF1_L   | 0.25  | -0.05  | 0.55  | 1.62  | 0.108 | 0.486 | 10   | No   |
| SLF1_R   | 0.19  | -0.11  | 0.49  | 1.25  | 0.213 | 0.872 | 11   | No   |
| SLF2_L   | -0.06 | -0.36  | 0.24  | -0.38 | 0.704 | 1.000 | 29   | No   |
| SLF2_R   | 0.08  | -0.22  | 0.38  | 0.51  | 0.609 | 1.000 | 25   | No   |
| SLF3_L   | 0.07  | -0.23  | 0.37  | 0.46  | 0.644 | 1.000 | 27   | No   |
| SLF3_R   | 0.03  | -0.28  | 0.33  | 0.16  | 0.870 | 1.000 | 39   | No   |
| FAT_L    | 0.12  | -0.18  | 0.42  | 0.77  | 0.441 | 1.000 | 18   | No   |
| FAT_R    | 0.01  | -0.29  | 0.32  | 0.09  | 0.929 | 0.973 | 43   | No   |
| PF_L     | -0.05 | -0.35  | 0.25  | -0.34 | 0.732 | 0.941 | 35   | No   |
| PF_R     | -0.16 | -0.46  | 0.14  | -1.03 | 0.306 | 0.983 | 14   | No   |
| CGB_L    | 0.15  | -0.15  | 0.45  | 0.99  | 0.324 | 0.972 | 15   | No   |
| CGB_R    | -0.05 | -0.36  | 0.25  | -0.35 | 0.729 | 0.965 | 34   | No   |
| CGH_L    | -0.06 | -0.36  | 0.25  | -0.36 | 0.716 | 1.000 | 32   | No   |
| CGH_R    | 0.02  | -0.28  | 0.33  | 0.16  | 0.876 | 0.986 | 40   | No   |
| FX_L     | -0.16 | -0.47  | 0.14  | -1.07 | 0.288 | 0.997 | 13   | No   |
| FX_R     | -0.14 | -0.45  | 0.16  | -0.94 | 0.349 | 0.981 | 16   | No   |
| ST_L     | -0.38 | -0.68  | -0.07 | -2.44 | 0.016 | 0.236 | 3    | No   |
| ST_R     | -0.31 | -0.61  | -0.01 | -2.01 | 0.046 | 0.256 | 8    | No   |
| UF_L     | -0.19 | -0.49  | 0.11  | -1.23 | 0.222 | 0.832 | 12   | No   |
| UF_R     | -0.34 | -0.64  | -0.03 | -2.20 | 0.029 | 0.329 | 4    | No   |
| IFOF_L   | -0.06 | -0.36  | 0.25  | -0.37 | 0.713 | 1.000 | 31   | No   |
| IFOF_R   | -0.29 | -0.60  | 0.01  | -1.92 | 0.057 | 0.285 | 9    | No   |
| ILF_L    | -0.40 | -0.71  | -0.10 | -2.61 | 0.010 | 0.221 | 2    | No   |
| ILF_R    | -0.34 | -0.64  | -0.03 | -2.18 | 0.031 | 0.229 | 6    | No   |
| FS_PFC_L | -0.02 | -0.32  | 0.28  | -0.13 | 0.900 | 0.988 | 41   | No   |
| FS_PFC_R | -0.03 | -0.33  | 0.27  | -0.19 | 0.850 | 1.000 | 38   | No   |

|                  |       |       |       |       |       |       |    |    |
|------------------|-------|-------|-------|-------|-------|-------|----|----|
| <b>FS_M_L</b>    | -0.06 | -0.36 | 0.24  | -0.38 | 0.708 | 1.000 | 30 | No |
| <b>FS_M_R</b>    | -0.14 | -0.44 | 0.17  | -0.88 | 0.380 | 1.000 | 17 | No |
| <b>TR_PFC_L</b>  | 0.05  | -0.25 | 0.36  | 0.35  | 0.724 | 0.987 | 33 | No |
| <b>TR_PFC_R</b>  | -0.11 | -0.41 | 0.19  | -0.73 | 0.469 | 1.000 | 20 | No |
| <b>TR_SM_L</b>   | 0.12  | -0.18 | 0.42  | 0.76  | 0.447 | 1.000 | 19 | No |
| <b>TR_SM_R</b>   | -0.01 | -0.31 | 0.30  | -0.03 | 0.974 | 0.974 | 45 | No |
| <b>TR_aud_L</b>  | 0.34  | 0.03  | 0.64  | 2.20  | 0.029 | 0.265 | 5  | No |
| <b>TR_aud_R</b>  | 0.01  | -0.29 | 0.32  | 0.10  | 0.924 | 0.990 | 42 | No |
| <b>TR_opt_L</b>  | -0.09 | -0.40 | 0.21  | -0.62 | 0.539 | 1.000 | 23 | No |
| <b>TR_opt_R</b>  | -0.42 | -0.73 | -0.12 | -2.74 | 0.007 | 0.302 | 1  | No |
| <b>CST_L</b>     | -0.04 | -0.34 | 0.26  | -0.27 | 0.787 | 0.957 | 37 | No |
| <b>CST_R</b>     | -0.05 | -0.35 | 0.25  | -0.31 | 0.760 | 0.950 | 36 | No |
| <b>CC_PFC</b>    | 0.08  | -0.22 | 0.38  | 0.53  | 0.594 | 1.000 | 24 | No |
| <b>CC_SM</b>     | 0.31  | 0.01  | 0.61  | 2.02  | 0.045 | 0.289 | 7  | No |
| <b>CC_pariet</b> | 0.10  | -0.20 | 0.40  | 0.63  | 0.527 | 1.000 | 22 | No |
| <b>CC_temp</b>   | -0.08 | -0.38 | 0.22  | -0.51 | 0.611 | 1.000 | 26 | No |
| <b>CC_splen</b>  | -0.10 | -0.41 | 0.20  | -0.67 | 0.504 | 1.000 | 21 | No |

### Result S8-1: Mean deviation difference of sex in people with ADHD

The effect size of the two-sample t-test of deviation of sex in people with ADHD (Male vs. Female), lower and upper bound of the confidence interval. The t-statistics, p-value, and adjusted p-value by Benjamini correction (FDR  $q=0.05$ ), the rank of p-value and whether the tract is significant after multiple corrections.

|          | ES    | CI_low | CI_up | t     | p     | p_adj | rank | Significance |
|----------|-------|--------|-------|-------|-------|-------|------|--------------|
| AF_L     | 0.29  | 0.02   | 0.56  | 2.13  | 0.034 | 0.096 | 16   | No           |
| AF_R     | 0.09  | -0.18  | 0.35  | 0.63  | 0.528 | 0.742 | 32   | No           |
| SLF1_L   | 0.08  | -0.18  | 0.35  | 0.60  | 0.547 | 0.724 | 34   | No           |
| SLF1_R   | 0.13  | -0.13  | 0.40  | 0.98  | 0.327 | 0.525 | 28   | No           |
| SLF2_L   | 0.41  | 0.14   | 0.68  | 3.01  | 0.003 | 0.032 | 4    | Yes          |
| SLF2_R   | 0.26  | -0.01  | 0.53  | 1.93  | 0.055 | 0.130 | 19   | No           |
| SLF3_L   | 0.44  | 0.17   | 0.71  | 3.23  | 0.001 | 0.020 | 3    | Yes          |
| SLF3_R   | 0.01  | -0.25  | 0.28  | 0.11  | 0.916 | 0.982 | 42   | No           |
| FAT_L    | 0.30  | 0.03   | 0.57  | 2.22  | 0.027 | 0.103 | 12   | No           |
| FAT_R    | 0.03  | -0.23  | 0.30  | 0.24  | 0.813 | 0.963 | 38   | No           |
| PF_L     | 0.03  | -0.24  | 0.29  | 0.20  | 0.844 | 0.926 | 41   | No           |
| PF_R     | 0.00  | -0.26  | 0.27  | 0.02  | 0.981 | 0.981 | 45   | No           |
| CGB_L    | 0.29  | 0.02   | 0.56  | 2.14  | 0.033 | 0.100 | 15   | No           |
| CGB_R    | 0.30  | 0.03   | 0.57  | 2.20  | 0.029 | 0.100 | 13   | No           |
| CGH_L    | 0.15  | -0.11  | 0.42  | 1.13  | 0.259 | 0.431 | 27   | No           |
| CGH_R    | 0.29  | 0.02   | 0.56  | 2.14  | 0.033 | 0.107 | 14   | No           |
| FX_L     | 0.23  | -0.03  | 0.50  | 1.73  | 0.086 | 0.183 | 21   | No           |
| FX_R     | -0.01 | -0.27  | 0.26  | -0.06 | 0.950 | 0.972 | 44   | No           |
| ST_L     | -0.08 | -0.35  | 0.18  | -0.61 | 0.542 | 0.739 | 33   | No           |
| ST_R     | -0.10 | -0.36  | 0.17  | -0.71 | 0.481 | 0.699 | 31   | No           |
| UF_L     | 0.28  | 0.01   | 0.55  | 2.07  | 0.039 | 0.103 | 17   | No           |
| UF_R     | 0.19  | -0.08  | 0.45  | 1.39  | 0.166 | 0.324 | 23   | No           |
| IFOF_L   | 0.34  | 0.07   | 0.60  | 2.47  | 0.014 | 0.063 | 10   | No           |
| IFOF_R   | 0.36  | 0.09   | 0.63  | 2.65  | 0.009 | 0.048 | 8    | Yes          |
| ILF_L    | -0.03 | -0.30  | 0.23  | -0.23 | 0.816 | 0.941 | 39   | No           |
| ILF_R    | 0.06  | -0.21  | 0.33  | 0.44  | 0.659 | 0.802 | 37   | No           |
| FS_PFC_L | 0.40  | 0.13   | 0.67  | 2.96  | 0.003 | 0.025 | 6    | Yes          |
| FS_PFC_R | 0.37  | 0.11   | 0.64  | 2.76  | 0.006 | 0.040 | 7    | Yes          |

|                  |       |       |      |       |        |       |    |     |
|------------------|-------|-------|------|-------|--------|-------|----|-----|
| <b>FS_M_L</b>    | 0.23  | -0.04 | 0.50 | 1.69  | 0.093  | 0.190 | 22 | No  |
| <b>FS_M_R</b>    | 0.25  | -0.02 | 0.52 | 1.85  | 0.066  | 0.148 | 20 | No  |
| <b>TR_PFC_L</b>  | 0.35  | 0.08  | 0.61 | 2.56  | 0.011  | 0.055 | 9  | No  |
| <b>TR_PFC_R</b>  | 0.31  | 0.05  | 0.58 | 2.31  | 0.022  | 0.089 | 11 | No  |
| <b>TR_SM_L</b>   | -0.01 | -0.28 | 0.25 | -0.10 | 0.922  | 0.964 | 43 | No  |
| <b>TR_SM_R</b>   | -0.18 | -0.45 | 0.08 | -1.35 | 0.178  | 0.321 | 25 | No  |
| <b>TR_aud_L</b>  | 0.06  | -0.20 | 0.33 | 0.46  | 0.648  | 0.810 | 36 | No  |
| <b>TR_aud_R</b>  | 0.12  | -0.15 | 0.39 | 0.88  | 0.379  | 0.569 | 30 | No  |
| <b>TR_opt_L</b>  | 0.07  | -0.19 | 0.34 | 0.54  | 0.589  | 0.757 | 35 | No  |
| <b>TR_opt_R</b>  | 0.03  | -0.24 | 0.30 | 0.22  | 0.823  | 0.926 | 40 | No  |
| <b>CST_L</b>     | 0.17  | -0.09 | 0.44 | 1.27  | 0.206  | 0.357 | 26 | No  |
| <b>CST_R</b>     | 0.13  | -0.14 | 0.39 | 0.94  | 0.347  | 0.538 | 29 | No  |
| <b>CC_PFC</b>    | 0.45  | 0.18  | 0.72 | 3.33  | 0.001  | 0.023 | 2  | Yes |
| <b>CC_SM</b>     | 0.26  | 0.00  | 0.53 | 1.95  | 0.052  | 0.130 | 18 | No  |
| <b>CC_pariet</b> | 0.40  | 0.13  | 0.67 | 2.96  | 0.003  | 0.030 | 5  | Yes |
| <b>CC_temp</b>   | 0.19  | -0.08 | 0.45 | 1.38  | 0.170  | 0.318 | 24 | No  |
| <b>CC_splen</b>  | 0.50  | 0.23  | 0.77 | 3.68  | <0.001 | 0.013 | 1  | Yes |

## Result S8-2: Mean deviation difference of sex in people with ASD

The effect size of two-sample t-test of deviation of sex in people with ASD (Male vs. Female), lower and upper bound of the confidence interval. The t-statistics, p-value, and adjusted p-value by Benjamini correction (FDR  $q=0.05$ ), the rank of p-value and whether the tract is significant after multiple corrections.

|          | ES    | CI_low | CI_up | t     | p     | p_adj | rank | Significance |
|----------|-------|--------|-------|-------|-------|-------|------|--------------|
| AF_L     | -0.09 | -0.59  | 0.41  | -0.34 | 0.735 | 0.919 | 36   | No           |
| AF_R     | 0.14  | -0.36  | 0.64  | 0.56  | 0.576 | 0.959 | 27   | No           |
| SLF1_L   | 0.20  | -0.30  | 0.70  | 0.79  | 0.433 | 1.000 | 17   | No           |
| SLF1_R   | 0.04  | -0.46  | 0.54  | 0.17  | 0.866 | 0.974 | 40   | No           |
| SLF2_L   | -0.13 | -0.63  | 0.37  | -0.51 | 0.612 | 0.918 | 30   | No           |
| SLF2_R   | -0.04 | -0.54  | 0.47  | -0.14 | 0.890 | 0.954 | 42   | No           |
| SLF3_L   | -0.21 | -0.71  | 0.29  | -0.83 | 0.409 | 1.000 | 14   | No           |
| SLF3_R   | -0.21 | -0.71  | 0.29  | -0.81 | 0.420 | 1.000 | 15   | No           |
| FAT_L    | 0.04  | -0.46  | 0.54  | 0.16  | 0.872 | 0.957 | 41   | No           |
| FAT_R    | -0.37 | -0.87  | 0.13  | -1.44 | 0.152 | 1.000 | 5    | No           |
| PF_L     | -0.40 | -0.90  | 0.11  | -1.55 | 0.123 | 1.000 | 4    | No           |
| PF_R     | -0.28 | -0.78  | 0.22  | -1.10 | 0.275 | 1.000 | 7    | No           |
| CGB_L    | -0.53 | -1.04  | -0.03 | -2.09 | 0.038 | 0.854 | 2    | No           |
| CGB_R    | -0.14 | -0.64  | 0.36  | -0.53 | 0.594 | 0.922 | 29   | No           |
| CGH_L    | -0.07 | -0.57  | 0.43  | -0.27 | 0.789 | 0.935 | 38   | No           |
| CGH_R    | 0.03  | -0.47  | 0.53  | 0.13  | 0.894 | 0.936 | 43   | No           |
| FX_L     | -0.22 | -0.72  | 0.28  | -0.87 | 0.384 | 1.000 | 13   | No           |
| FX_R     | -0.15 | -0.65  | 0.35  | -0.58 | 0.559 | 0.968 | 26   | No           |
| ST_L     | 0.13  | -0.37  | 0.63  | 0.51  | 0.613 | 0.890 | 31   | No           |
| ST_R     | -0.14 | -0.64  | 0.36  | -0.55 | 0.582 | 0.935 | 28   | No           |
| UF_L     | -0.25 | -0.75  | 0.25  | -0.98 | 0.328 | 1.000 | 9    | No           |
| UF_R     | -0.01 | -0.51  | 0.49  | -0.05 | 0.959 | 0.981 | 44   | No           |
| IFOF_L   | -0.23 | -0.73  | 0.27  | -0.89 | 0.374 | 1.000 | 12   | No           |
| IFOF_R   | -0.16 | -0.66  | 0.34  | -0.64 | 0.525 | 0.985 | 24   | No           |
| ILF_L    | 0.09  | -0.41  | 0.59  | 0.36  | 0.716 | 0.947 | 34   | No           |
| ILF_R    | 0.09  | -0.41  | 0.59  | 0.35  | 0.726 | 0.934 | 35   | No           |
| FS_PFC_L | -0.12 | -0.62  | 0.38  | -0.49 | 0.626 | 0.881 | 32   | No           |
| FS_PFC_R | -0.16 | -0.66  | 0.34  | -0.64 | 0.524 | 1.000 | 23   | No           |

|                  |       |       |       |       |       |       |    |    |
|------------------|-------|-------|-------|-------|-------|-------|----|----|
| <b>FS_M_L</b>    | -0.01 | -0.51 | 0.49  | -0.04 | 0.972 | 0.972 | 45 | No |
| <b>FS_M_R</b>    | -0.61 | -1.11 | -0.10 | -2.37 | 0.019 | 0.848 | 1  | No |
| <b>TR_PFC_L</b>  | -0.20 | -0.70 | 0.30  | -0.78 | 0.439 | 1.000 | 18 | No |
| <b>TR_PFC_R</b>  | -0.19 | -0.70 | 0.31  | -0.76 | 0.448 | 1.000 | 19 | No |
| <b>TR_SM_L</b>   | -0.16 | -0.67 | 0.34  | -0.64 | 0.520 | 1.000 | 22 | No |
| <b>TR_SM_R</b>   | -0.10 | -0.60 | 0.40  | -0.39 | 0.699 | 0.953 | 33 | No |
| <b>TR_aud_L</b>  | -0.08 | -0.58 | 0.42  | -0.31 | 0.758 | 0.922 | 37 | No |
| <b>TR_aud_R</b>  | -0.06 | -0.56 | 0.44  | -0.24 | 0.807 | 0.931 | 39 | No |
| <b>TR_opt_L</b>  | -0.18 | -0.68 | 0.32  | -0.71 | 0.480 | 1.000 | 21 | No |
| <b>TR_opt_R</b>  | -0.19 | -0.69 | 0.31  | -0.75 | 0.454 | 1.000 | 20 | No |
| <b>CST_L</b>     | -0.16 | -0.66 | 0.34  | -0.62 | 0.535 | 0.963 | 25 | No |
| <b>CST_R</b>     | -0.28 | -0.78 | 0.22  | -1.10 | 0.272 | 1.000 | 6  | No |
| <b>CC_PFC</b>    | -0.26 | -0.76 | 0.24  | -1.03 | 0.304 | 1.000 | 8  | No |
| <b>CC_SM</b>     | -0.20 | -0.70 | 0.30  | -0.79 | 0.432 | 1.000 | 16 | No |
| <b>CC_pariet</b> | 0.42  | -0.08 | 0.93  | 1.66  | 0.098 | 1.000 | 3  | No |
| <b>CC_temp</b>   | -0.23 | -0.74 | 0.27  | -0.92 | 0.359 | 1.000 | 10 | No |
| <b>CC_splen</b>  | -0.23 | -0.73 | 0.27  | -0.91 | 0.366 | 1.000 | 11 | No |



**Result S9-1: Two-way ANOVA for diagnosis\*age-group interactions.**

Two-way ANOVA for diagnosis\*age-group interactions in people with ASD and people with ADHD. The F-ratio, p value, and adjusted p-value by Benjamini correction (FDR q=0.05), the rank of p-value and whether the tract is significant after multiple corrections.

|                 | <b>F</b> | <b>p</b> | <b>p_adj</b> | <b>rank</b> | <b>Significance</b> |
|-----------------|----------|----------|--------------|-------------|---------------------|
| <b>AF_L</b>     | 0.04     | 0.838    | 0.992        | 38          | No                  |
| <b>AF_R</b>     | 0.88     | 0.348    | 0.977        | 16          | No                  |
| <b>SLF1_L</b>   | 2.11     | 0.147    | 1.000        | 5           | No                  |
| <b>SLF1_R</b>   | 0.06     | 0.801    | 1.002        | 36          | No                  |
| <b>SLF2_L</b>   | 0.02     | 0.883    | 1.000        | 39          | No                  |
| <b>SLF2_R</b>   | 0.81     | 0.369    | 0.976        | 17          | No                  |
| <b>SLF3_L</b>   | 0.41     | 0.524    | 0.943        | 25          | No                  |
| <b>SLF3_R</b>   | 1.29     | 0.256    | 0.960        | 12          | No                  |
| <b>FAT_L</b>    | 0.60     | 0.440    | 0.990        | 20          | No                  |
| <b>FAT_R</b>    | 0.30     | 0.586    | 0.942        | 28          | No                  |
| <b>PF_L</b>     | 0.10     | 0.747    | 0.961        | 35          | No                  |
| <b>PF_R</b>     | 0.92     | 0.339    | 1.000        | 15          | No                  |
| <b>CGB_L</b>    | 2.04     | 0.154    | 1.000        | 6           | No                  |
| <b>CGB_R</b>    | 0.77     | 0.382    | 0.956        | 18          | No                  |
| <b>CGH_L</b>    | 1.86     | 0.173    | 1.000        | 7           | No                  |
| <b>CGH_R</b>    | 0.06     | 0.812    | 0.987        | 37          | No                  |
| <b>FX_L</b>     | 1.40     | 0.238    | 0.973        | 11          | No                  |
| <b>FX_R</b>     | 1.27     | 0.261    | 0.903        | 13          | No                  |
| <b>ST_L</b>     | 2.32     | 0.129    | 1.000        | 4           | No                  |
| <b>ST_R</b>     | 0.01     | 0.911    | 0.999        | 41          | No                  |
| <b>UF_L</b>     | 0.26     | 0.611    | 0.887        | 31          | No                  |
| <b>UF_R</b>     | 3.13     | 0.078    | 1.000        | 3           | No                  |
| <b>IFOF_L</b>   | 0.15     | 0.695    | 0.920        | 34          | No                  |
| <b>IFOF_R</b>   | 1.68     | 0.196    | 1.000        | 8           | No                  |
| <b>ILF_L</b>    | 0.46     | 0.498    | 1.000        | 21          | No                  |
| <b>ILF_R</b>    | 0.63     | 0.427    | 1.000        | 19          | No                  |
| <b>FS_PFC_L</b> | 0.21     | 0.646    | 0.908        | 32          | No                  |
| <b>FS_PFC_R</b> | 0.02     | 0.884    | 0.994        | 40          | No                  |
| <b>FS_M_L</b>   | 0.26     | 0.611    | 0.916        | 30          | No                  |

|                  |      |       |       |    |    |
|------------------|------|-------|-------|----|----|
| <b>FS_M_R</b>    | 0.00 | 0.974 | 1.000 | 43 | No |
| <b>TR_PFC_L</b>  | 0.21 | 0.650 | 0.886 | 33 | No |
| <b>TR_PFC_R</b>  | 1.46 | 0.228 | 1.000 | 10 | No |
| <b>TR_SM_L</b>   | 0.94 | 0.333 | 1.000 | 14 | No |
| <b>TR_SM_R</b>   | 0.00 | 0.990 | 1.000 | 44 | No |
| <b>TR_aud_L</b>  | 3.96 | 0.047 | 2.128 | 1  | No |
| <b>TR_aud_R</b>  | 0.01 | 0.934 | 1.000 | 42 | No |
| <b>TR_opt_L</b>  | 0.35 | 0.553 | 0.921 | 27 | No |
| <b>TR_opt_R</b>  | 3.52 | 0.061 | 1.000 | 2  | No |
| <b>CST_L</b>     | 0.41 | 0.522 | 0.979 | 24 | No |
| <b>CST_R</b>     | 0.00 | 0.994 | 0.994 | 45 | No |
| <b>CC_PFC</b>    | 0.29 | 0.590 | 0.916 | 29 | No |
| <b>CC_SM</b>     | 1.57 | 0.212 | 1.000 | 9  | No |
| <b>CC_pariet</b> | 0.41 | 0.522 | 1.000 | 23 | No |
| <b>CC_temp</b>   | 0.37 | 0.545 | 0.943 | 26 | No |
| <b>CC_splen</b>  | 0.42 | 0.516 | 1.000 | 22 | No |

### Result S9-2: Two-way ANOVA for diagnosis\*sex interactions.

Two-way ANOVA for diagnosis\*sex interactions in people with ASD and people with ADHD. The F-ratio, p-value, and adjusted p-value by Benjamini correction (FDR  $q=0.05$ ), the rank of p-value and whether the tract is significant after multiple corrections.

|                 | <b>F</b> | <b>p</b> | <b>p_adj</b> | <b>rank</b> | <b>pass</b> |
|-----------------|----------|----------|--------------|-------------|-------------|
| <b>AF_L</b>     | 1.71     | 0.192    | 0.411        | 21          | No          |
| <b>AF_R</b>     | 0.04     | 0.835    | 0.894        | 42          | No          |
| <b>SLF1_L</b>   | 0.23     | 0.631    | 0.767        | 37          | No          |
| <b>SLF1_R</b>   | 0.10     | 0.752    | 0.846        | 40          | No          |
| <b>SLF2_L</b>   | 3.43     | 0.065    | 0.363        | 8           | No          |
| <b>SLF2_R</b>   | 1.02     | 0.313    | 0.613        | 23          | No          |
| <b>SLF3_L</b>   | 5.05     | 0.025    | 0.226        | 5           | No          |
| <b>SLF3_R</b>   | 0.57     | 0.452    | 0.656        | 31          | No          |
| <b>FAT_L</b>    | 0.71     | 0.398    | 0.664        | 27          | No          |
| <b>FAT_R</b>    | 2.06     | 0.152    | 0.360        | 19          | No          |
| <b>PF_L</b>     | 2.26     | 0.134    | 0.376        | 16          | No          |
| <b>PF_R</b>     | 0.98     | 0.323    | 0.606        | 24          | No          |
| <b>CGB_L</b>    | 8.46     | 0.004    | 0.086        | 2           | No          |
| <b>CGB_R</b>    | 2.23     | 0.136    | 0.360        | 17          | No          |
| <b>CGH_L</b>    | 0.59     | 0.442    | 0.663        | 30          | No          |
| <b>CGH_R</b>    | 0.72     | 0.397    | 0.687        | 26          | No          |
| <b>FX_L</b>     | 2.56     | 0.110    | 0.331        | 15          | No          |
| <b>FX_R</b>     | 0.28     | 0.598    | 0.768        | 35          | No          |
| <b>ST_L</b>     | 0.54     | 0.465    | 0.653        | 32          | No          |
| <b>ST_R</b>     | 0.02     | 0.879    | 0.899        | 44          | No          |
| <b>UF_L</b>     | 3.38     | 0.067    | 0.334        | 9           | No          |
| <b>UF_R</b>     | 0.45     | 0.502    | 0.684        | 33          | No          |
| <b>IFOF_L</b>   | 3.80     | 0.052    | 0.389        | 6           | No          |
| <b>IFOF_R</b>   | 3.19     | 0.075    | 0.280        | 12          | No          |
| <b>ILF_L</b>    | 0.18     | 0.672    | 0.776        | 39          | No          |
| <b>ILF_R</b>    | 0.01     | 0.935    | 0.935        | 45          | No          |
| <b>FS_PFC_L</b> | 3.25     | 0.072    | 0.294        | 11          | No          |
| <b>FS_PFC_R</b> | 3.36     | 0.067    | 0.304        | 10          | No          |
| <b>FS_M_L</b>   | 0.64     | 0.424    | 0.681        | 28          | No          |

|                  |      |       |       |    |    |
|------------------|------|-------|-------|----|----|
| <b>FS_M_R</b>    | 9.03 | 0.003 | 0.126 | 1  | No |
| <b>TR_PFC_L</b>  | 3.52 | 0.061 | 0.394 | 7  | No |
| <b>TR_PFC_R</b>  | 3.06 | 0.081 | 0.280 | 13 | No |
| <b>TR_SM_L</b>   | 0.26 | 0.608 | 0.760 | 36 | No |
| <b>TR_SM_R</b>   | 0.09 | 0.763 | 0.838 | 41 | No |
| <b>TR_aud_L</b>  | 0.23 | 0.633 | 0.749 | 38 | No |
| <b>TR_aud_R</b>  | 0.40 | 0.529 | 0.700 | 34 | No |
| <b>TR_opt_L</b>  | 0.76 | 0.383 | 0.690 | 25 | No |
| <b>TR_opt_R</b>  | 0.61 | 0.437 | 0.678 | 29 | No |
| <b>CST_L</b>     | 1.32 | 0.251 | 0.514 | 22 | No |
| <b>CST_R</b>     | 1.98 | 0.160 | 0.359 | 20 | No |
| <b>CC_PFC</b>    | 6.00 | 0.015 | 0.165 | 4  | No |
| <b>CC_SM</b>     | 2.62 | 0.106 | 0.341 | 14 | No |
| <b>CC_pariet</b> | 0.03 | 0.870 | 0.911 | 43 | No |
| <b>CC_temp</b>   | 2.10 | 0.148 | 0.370 | 18 | No |
| <b>CC_splen</b>  | 6.26 | 0.013 | 0.190 | 3  | No |

**Result S9-3: Three-way ANOVA for diagnosis\*sex\*age-group interactions.**

Three-way ANOVA for diagnosis\*sex\*age-group interactions in people with ASD and people with ADHD. The F-ratio, p-value, and adjusted p-value by Benjamini correction (FDR q=0.05), the rank of p-value, and whether the tract is significant after multiple corrections.

|                 | <b>F</b> | <b>p</b> | <b>p_adj</b> | <b>rank</b> | <b>pass</b> |
|-----------------|----------|----------|--------------|-------------|-------------|
| <b>AF_L</b>     | 0.01     | 0.916    | 1.000        | 41          | No          |
| <b>AF_R</b>     | 2.26     | 0.134    | 0.430        | 14          | No          |
| <b>SLF1_L</b>   | 0.67     | 0.415    | 0.849        | 22          | No          |
| <b>SLF1_R</b>   | 2.33     | 0.128    | 0.442        | 13          | No          |
| <b>SLF2_L</b>   | 1.68     | 0.196    | 0.551        | 16          | No          |
| <b>SLF2_R</b>   | 0.37     | 0.545    | 1.000        | 24          | No          |
| <b>SLF3_L</b>   | 0.30     | 0.585    | 0.975        | 27          | No          |
| <b>SLF3_R</b>   | 1.37     | 0.243    | 0.575        | 19          | No          |
| <b>FAT_L</b>    | 0.00     | 0.975    | 0.975        | 45          | No          |
| <b>FAT_R</b>    | 0.23     | 0.631    | 0.979        | 29          | No          |
| <b>PF_L</b>     | 0.85     | 0.358    | 0.806        | 20          | No          |
| <b>PF_R</b>     | 0.15     | 0.698    | 1.000        | 30          | No          |
| <b>CGB_L</b>    | 0.11     | 0.742    | 1.000        | 32          | No          |
| <b>CGB_R</b>    | 0.05     | 0.821    | 1.000        | 35          | No          |
| <b>CGH_L</b>    | 6.51     | 0.011    | 0.166        | 3           | No          |
| <b>CGH_R</b>    | 0.05     | 0.825    | 1.000        | 36          | No          |
| <b>FX_L</b>     | 0.32     | 0.571    | 0.988        | 26          | No          |
| <b>FX_R</b>     | 0.02     | 0.885    | 0.995        | 40          | No          |
| <b>ST_L</b>     | 3.67     | 0.056    | 0.361        | 7           | No          |
| <b>ST_R</b>     | 10.87    | 0.001    | 0.048        | 1           | Yes         |
| <b>UF_L</b>     | 2.67     | 0.103    | 0.387        | 12          | No          |
| <b>UF_R</b>     | 3.11     | 0.079    | 0.354        | 10          | No          |
| <b>IFOF_L</b>   | 2.22     | 0.137    | 0.412        | 15          | No          |
| <b>IFOF_R</b>   | 4.22     | 0.041    | 0.305        | 6           | No          |
| <b>ILF_L</b>    | 10.51    | 0.001    | 0.029        | 2           | Yes         |
| <b>ILF_R</b>    | 6.15     | 0.014    | 0.152        | 4           | No          |
| <b>FS_PFC_L</b> | 1.63     | 0.202    | 0.535        | 17          | No          |
| <b>FS_PFC_R</b> | 0.29     | 0.593    | 0.953        | 28          | No          |
| <b>FS_M_L</b>   | 0.07     | 0.798    | 1.000        | 34          | No          |

|                  |      |       |       |    |    |
|------------------|------|-------|-------|----|----|
| <b>FS_M_R</b>    | 2.86 | 0.092 | 0.375 | 11 | No |
| <b>TR_PFC_L</b>  | 0.09 | 0.762 | 1.000 | 33 | No |
| <b>TR_PFC_R</b>  | 0.00 | 0.968 | 0.990 | 44 | No |
| <b>TR_SM_L</b>   | 0.00 | 0.968 | 1.000 | 43 | No |
| <b>TR_SM_R</b>   | 0.04 | 0.850 | 0.981 | 39 | No |
| <b>TR_aud_L</b>  | 0.54 | 0.465 | 0.909 | 23 | No |
| <b>TR_aud_R</b>  | 0.01 | 0.934 | 1.000 | 42 | No |
| <b>TR_opt_L</b>  | 3.33 | 0.069 | 0.386 | 8  | No |
| <b>TR_opt_R</b>  | 4.33 | 0.038 | 0.342 | 5  | No |
| <b>CST_L</b>     | 0.05 | 0.831 | 1.000 | 37 | No |
| <b>CST_R</b>     | 0.32 | 0.570 | 1.000 | 25 | No |
| <b>CC_PFC</b>    | 1.63 | 0.203 | 0.508 | 18 | No |
| <b>CC_SM</b>     | 3.31 | 0.069 | 0.347 | 9  | No |
| <b>CC_pariet</b> | 0.14 | 0.709 | 1.000 | 31 | No |
| <b>CC_temp</b>   | 0.04 | 0.842 | 0.997 | 38 | No |
| <b>CC_splen</b>  | 0.71 | 0.399 | 0.856 | 21 | No |

**Result S10: Spearman’s correlations of deviation profiles and idiosyncrasy profiles.**

The inter-group correlations of deviation profiles and idiosyncrasy profiles. The Spearman’s correlation, 95% confidence interval, p-value (one-tailed), and adjusted p-value by Benjamini correction (FDR q=0.05), the rank of p-value and whether the tract is significant after multiple corrections.

| Group1       | Group2       | Item         | rho  | CI_up | CI_low | p      | p_adj  | rank | Significance |
|--------------|--------------|--------------|------|-------|--------|--------|--------|------|--------------|
| ADHD         | ASD          | Deviation    | 0.54 | 0.72  | 0.30   | <0.001 | <0.001 | 3    | Yes          |
| ADHD         | ADHD sibling | Deviation    | 0.51 | 0.70  | 0.26   | <0.001 | <0.001 | 4    | Yes          |
| ASD          | ASD sibling  | Deviation    | 0.69 | 0.82  | 0.50   | <0.001 | <0.001 | 1    | Yes          |
| ADHD sibling | ASD sibling  | Deviation    | 0.29 | 0.54  | 0.00   | 0.025  | 0.041  | 5    | Yes          |
| ADHD         | ASD          | Idiosyncrasy | 0.55 | 0.72  | 0.30   | <0.001 | <0.001 | 2    | Yes          |
| ADHD         | ADHD sibling | Idiosyncrasy | 0.15 | 0.42  | -0.15  | 0.165  | 0.189  | 7    | No           |
| ASD          | ASD sibling  | Idiosyncrasy | 0.19 | 0.46  | -0.11  | 0.101  | 0.135  | 6    | No           |
| ADHD sibling | ASD sibling  | Idiosyncrasy | 0.01 | 0.31  | -0.28  | 0.464  | 0.464  | 8    | No           |

## Supplementary Discussion

### **The shared brain-symptom relationship (Figure 4A)**

In the 1<sup>st</sup> dimension, deviations of the tracts connecting the prefrontal and temporal cortex, cingulum-body, and frontal aslant tract exhibited associations linked with autistic symptoms, including social skills, communications, attention to details, and imagination. The left frontal aslant tract has been proved to be associated with speech and language (124), while the uncinate fasciculus has been associated with linguistic functions and social-emotional processing (114). The involvement of the cingulum-body is in accord with our expectations since impaired focused and sustained attention has been reported following the cingulotomy (110, 125). Most tracts in Papez circuit, i.e., the medial limbic circuit, which is implicated in emotional experiences and memory (126), were involved in the 1<sup>st</sup> mode, including cingulum, stria terminalis, and corpus callosum to the temporal cortex. However, tracts associated with memory processing, including hippocampus, fornix, and cingulum-hippocampus, were not involved. This echoes the notion that the limbic system may play an important role in autistic symptoms, but tracts associated with memory were relatively less affected in people with ASD (127). The 2<sup>nd</sup> dimension involved the link between tracts connecting the temporal and parietal cortex with the inflexibility of autistic symptoms, especially the unique mannerism of SRS and attention switching of Autism Spectrum Quotient. Among the involved tracts, the inferior longitudinal fasciculus has been associated with facial and object recognition, as well as lexical and semantic cognition (128), while the left arcuate fasciculus plays an important role in language, as damage of this tract leads to conduction aphasia (105). On the other hand, the cingulum-hippocampus was involved in the 2<sup>nd</sup> mode rather than the 1<sup>st</sup> mode. The association of these tracts with the inflexibility of autistic symptoms across neurodevelopmental conditions might be a new finding, but needs further investigations.

### **The shared brain-cognition relationship (Figure 4B)**

The 1<sup>st</sup> dimension involved the link of visual memory and attention alongside processing speed with deviations in the arcuate fasciculus, thalamic radiations, corticospinal tracts, and hippocampal connections of Papez circuits (fornix, cingulum-hippocampal). The 2<sup>nd</sup> dimension comprised the link between cognitive function involving generalized intelligence, planning, inhibition and visuospatial (working) memory, and deviations in the cingulum and the left SLF-II&III. The lateralized brain network of SLFs in the visuospatial attention has been well-documented, and SLF II&III showed more lateralization than SLF I (106). The 3<sup>rd</sup> dimension illustrated associations of nonverbal intelligence and attention with the frontostriatal circuit-motor and SLF-I. The frontostriatal circuit is involved in goal-directed behaviors, which is formed by bi-directional communications of the cortex and basal ganglia (117). The 4th dimension was loaded



by working memory, attention, and verbal intelligence, driven by the corpus callosum, ventral association tracts (uncinate fasciculus, inferior fronto-occipital fasciculus), dorsal association tracts (SLF, AF), stria terminalis, and thalamic radiations. In fact, the language network (129) includes a dorsal pathway, consisting of the arcuate fasciculus and superior longitudinal fasciculus (105, 107), and a ventral pathway, comprising the uncinate fasciculus and inferior fronto-occipital fasciculus (115). Thus, this mode may highlight the association between language function and the language network. The 5th dimension comprised planning, set-shifting, response variability, and verbal IQ, linked with the corpus callosum-frontoparietal and thalamic radiations. The corpus callosum plays a major role in inter-connection and communication between cerebral hemispheres. It has been reported that both functional and anatomical cortical underconnectivity, especially in the frontal and parietal regions, exists in autism (130). In sum, cognitive constructs and white matter deviations selected by the CCA in different modes are largely consistent with the results from the previous univariate analysis on brain-cognition relationships in typically developing populations (131-133). Notably, the functional mappings of white matter tracts are still under active investigations via the lesion studies (113, 125) and MRI studies (108, 114). The current study reveals the shared multifaceted brain-behavior relationship among neurodevelopmental disorders (134), adding new value to our understanding of the functional role of white matter tracts.

## References

1. Gau SS, Lee CM, Lai MC, Chiu YN, Huang YF, Kao JD, Wu YY. Psychometric properties of the Chinese version of the social communication questionnaire. *Res Autism Spectr Disord*. 2011;5:809-818.
2. Gau SS, Chong MY, Chen TH, Cheng AT. A 3-year panel study of mental disorders among adolescents in Taiwan. *Am J Psychiatry*. 2005;162:1344-1350.
3. Lau WY-P, Gau SS-F, Chiu Y-N, Wu Y-Y, Chou W-J, Liu S-K, Chou M-C. Psychometric properties of the Chinese version of the Autism Spectrum Quotient (AQ). *Research in Developmental Disabilities*. 2013;34:294-305.
4. Gau SS, Liu LT, Wu YY, Chiu YN, Tsai WC. Psychometric properties of the Chinese version of the social responsiveness scale. *Res Autism Spectr Disord*. 2013;7:349-360.
5. Gau SS-F, Shang C-Y, Liu S-K, Lin C-H, Swanson JM, Liu Y-C, Tu C-L. Psychometric properties of the Chinese version of the Swanson, Nolan, and Pelham, version IV scale – parent form. *International Journal of Methods in Psychiatric Research*. 2008;17:35-44.
6. Conners CK, Epstein JN, Angold A, Klaric J. Continuous Performance Test Performance in a Normative Epidemiological Sample. *Journal of Abnormal Child Psychology*. 2003;31:555-562.
7. Luciana M. Practitioner Review: Computerized assessment of neuropsychological function in children: clinical and research applications of the Cambridge Neuropsychological Testing Automated Battery (CANTAB). *Journal of Child Psychology and Psychiatry*. 2003;44:649-663.
8. Nurnberger JI, Jr., Blehar MC, Kaufmann CA, York-Cooler C, Simpson SG, Harkavy-Friedman J, Severe JB, Malaspina D, Reich T. Diagnostic Interview for Genetic Studies: Rationale, Unique Features, and Training. *Archives of General Psychiatry*. 1994;51:849-859.
9. Baron-Cohen S, Hoekstra RA, Knickmeyer R, Wheelwright S. The Autism-Spectrum Quotient (AQ)—Adolescent Version. *Journal of Autism and Developmental Disorders*. 2006;36:343.
10. Baron-Cohen S, Wheelwright S, Skinner RM, Martin J, Clubley E, Joseph A, Disorders D. The Autism-Spectrum Quotient (AQ): Evidence from Asperger Syndrome/High-Functioning Autism, Males and Females, Scientists and Mathematicians. 2001;31:5-17.
11. American Psychiatric Association: Diagnostic and statistical manual of mental disorders. 5th ed, Arlington, VA: Author; 2013.
12. Gau SF, Soong WT. Psychiatric comorbidity of adolescents with sleep terrors or sleepwalking: a case-control study. *Aust N Z J Psychiatry*. 1999;33:734-739.
13. Chou TL, Chia S, Shang CY, Gau SS. Differential therapeutic effects of 12-week treatment of atomoxetine and methylphenidate on drug-naive children with attention deficit/hyperactivity

disorder: A counting Stroop functional MRI study. *European neuropsychopharmacology : the journal of the European College of Neuropsychopharmacology*. 2015;8:00280-00281.

14. Chen YL, Chen WJ, Lin KC, Shen LJ, Gau SS. Prevalence of DSM-5 mental disorders in a nationally representative sample of children in Taiwan: methodology and main findings. *Epidemiol Psychiatr Sci*. 2019;30:1-9.

15. Hwang-Gu SL, Gau SS. Interval timing deficits assessed by time reproduction dual tasks as cognitive endophenotypes for attention-deficit/hyperactivity disorder. *PLoS One*.

2015;10:e0127157. doi: 0127110.0121371/journal.pone.0127157. eCollection 0122015.

16. Chiang HL, Hsu YC, Shang CY, Tseng WI, Gau SS. White matter endophenotype candidates for ADHD: a diffusion imaging tractography study with sibling design. *Psychol Med*. 2019;22:1-11.

17. Gau SS, Ni HC, Shang CY, Soong WT, Wu YY, Lin LY, Chiu YN. Psychiatric comorbidity among children and adolescents with and without persistent attention-deficit hyperactivity disorder. *Aust N Z J Psychiatry*. 2010;44:135-143.

18. M. R, A. LC, C. L: *Autism Diagnostic Interview Revised*, Los Angeles: Western Psychological Services; 2003.

19. Lau WY, Gau SS, Chiu YN, Wu YY, Chou WJ, Liu SK, Chou MC. Psychometric properties of the Chinese version of the autism spectrum quotient (AQ). *Res Dev Disabil*. 2013;34:294-305. doi: 210.1016/j.ridd.2012.1008.1005. Epub 2012 Sep 1015.

20. Ni HC, Lin HY, Tseng WI, Chiu YN, Wu YY, Tsai WC, Gau SS. Neural correlates of impaired self-regulation in male youths with autism spectrum disorder: A voxel-based morphometry study. *Prog Neuropsychopharmacol Biol Psychiatry*. 2018;82:233-241.:10.1016/j.pnpbp.2017.1011.1008. Epub 2017 Nov 1019.

21. Chiang HL, Kao WC, Chou MC, Chou WJ, Chiu YN, Wu YY, Gau SS. School dysfunction in youth with autistic spectrum disorder in Taiwan: The effect of subtype and ADHD. *Autism Res*. 2018;10.

22. Chang JP, Lai MC, Chou MC, Shang CY, Chiu YN, Tsai WC, Wu YY, Gau SS. Maternal and Family Processes in Different Subgroups of Youth with Autism Spectrum Disorder. *J Abnorm Child Psychol*. 2018;8:018-0404.

23. Ni HC, Lin HY, Tseng WI, Chiu YN, Wu YY, Tsai WC, Gau SS. Neural correlates of impaired self-regulation in male youths with autism spectrum disorder: A voxel-based morphometry study. *Prog Neuropsychopharmacol Biol Psychiatry*. 2017;9:30803-30805.

24. Lin HY, Tseng WI, Lai MC, Chang YT, Gau SS. Shared atypical brain anatomy and intrinsic functional architecture in male youth with autism spectrum disorder and their unaffected brothers. *Psychol Med*. 2017;47:639-654. doi: 610.1017/S0033291716002695. Epub 0033291716002016 Nov 0033291716002699.

25. Chien YL, Wu SW, Chu CP, Hsieh ST, Chao CC, Gau SS. Attenuated contact heat-evoked potentials associated with sensory and social-emotional symptoms in individuals with autism spectrum disorder. *Sci Rep.* 2017;7:36887.:10.1038/srep36887.
26. Chien YL, Hsieh MH, Gau SS. Mismatch Negativity and P3a in Adolescents and Young Adults with Autism Spectrum Disorders: Behavioral Correlates and Clinical Implications. *J Autism Dev Disord.* 2017;2:017-3426.
27. Chien YL, Chou MC, Chiu YN, Chou WJ, Wu YY, Tsai WC, Gau SS. ADHD-related symptoms and attention profiles in the unaffected siblings of probands with autism spectrum disorder: focus on the subtypes of autism and Asperger's disorder. *Mol Autism.* 2017;8:37.:10.1186/s13229-13017-10153-13229. eCollection 12017.
28. Chien YL, Chen YJ, Hsu YC, Tseng WI, Gau SS. Altered white-matter integrity in unaffected siblings of probands with autism spectrum disorders. *Hum Brain Mapp.* 2017;20:23810.
29. Tsai CJ, Chen YL, Lin HY, Gau SS. One-year trajectory analysis for ADHD symptoms and its associated factors in community-based children and adolescents in Taiwan. *Child Adolesc Psychiatry Ment Health.* 2017;11:28.:10.1186/s13034-13017-10165-13034. eCollection 12017.
30. Chen YL, Shen LJ, Gau SS. The Mandarin version of the Kiddie-Schedule for Affective Disorders and Schizophrenia-Epidemiological version for DSM-5 - A psychometric study. *J Formos Med Assoc.* 2017;116:671-678. doi: 610.1016/j.jfma.2017.1006.1013. Epub 2017 Jul 1011.
31. Yin CL, Chen HI, Li LH, Chien YL, Liao HM, Chou MC, Chou WJ, Tsai WC, Chiu YN, Wu YY, Lo CZ, Wu JY, Chen YT, Gau SS. Genome-wide analysis of copy number variations identifies PARK2 as a candidate gene for autism spectrum disorder. *Mol Autism.* 2016;7:23.:10.1186/s13229-13016-10087-13227. eCollection 12016.
32. Lin HY, Tseng WI, Lai MC, Chang YT, Gau SS. Shared atypical brain anatomy and intrinsic functional architecture in male youth with autism spectrum disorder and their unaffected brothers. *Psychol Med.* 2016;9:1-16.
33. Chien HY, Gau SS, Isaac Tseng WY. Deficient visuospatial working memory functions and neural correlates of the default-mode network in adolescents with autism spectrum disorder. *Autism Res.* 2016;1.
34. Chiang HL, Gau SS. Comorbid psychiatric conditions as mediators to predict later social adjustment in youths with autism spectrum disorder. *J Child Psychol Psychiatry.* 2016;57:103–111
35. Chen SF, Chien YL, Wu CT, Shang CY, Wu YY, Gau SS. Deficits in executive functions among youths with autism spectrum disorders: an age-stratified analysis. *Psychol Med.* 2016;46:1625-1638. doi: 1610.1017/S0033291715002238. Epub 0033291715002016 Mar

0033291715002221.

36. Chen PJ, Gau SS, Lee SH, Chou TL. Differences in age-dependent neural correlates of semantic processing between youths with autism spectrum disorder and typically developing youths. *Autism Res.* 2016;21.
37. Liu X, Shimada T, Otowa T, Wu YY, Kawamura Y, Tochigi M, Iwata Y, Umekage T, Toyota T, Maekawa M, Iwayama Y, Suzuki K, Kakiuchi C, Kuwabara H, Kano Y, Nishida H, Sugiyama T, Kato N, Chen CH, Mori N, Yamada K, Yoshikawa T, Kasai K, Tokunaga K, Sasaki T, Gau SS. Genome-wide Association Study of Autism Spectrum Disorder in the East Asian Populations. *Autism Res.* 2015;28.
38. Lin HY, Ni HC, Lai MC, Tseng WY, Gau SS. Regional brain volume differences between males with and without autism spectrum disorder are highly age-dependent. *Mol Autism.* 2015;6:29.:10.1186/s13229-13015-10022-13223. eCollection 12015.
39. Kuo PH, Chuang LC, Su MH, Chen CH, Chen CH, Wu JY, Yen CJ, Wu YY, Liu SK, Chou MC, Chou WJ, Chiu YN, Tsai WC, Gau SS. Genome-Wide Association Study for Autism Spectrum Disorder in Taiwanese Han Population. *PLoS One.* 2015;10:e0138695. doi: 0138610.0131371/journal.pone.0138695. eCollection 0132015.
40. Chien YL, Gau SS, Shang CY, Chiu YN, Tsai WC, Wu YY. Visual memory and sustained attention impairment in youths with autism spectrum disorders. *Psychol Med.* 2015;45:2263-2273. doi: 2210.1017/S0033291714003201. Epub 0033291714002015 Apr 0033291714003223.
41. Auyeung B, Baron-Cohen S, Wheelwright S, Allison C. The Autism Spectrum Quotient: Children's Version (AQ-Child). *Journal of Autism and Developmental Disorders.* 2008;38:1230-1240.
42. Austin EJ. Personality correlates of the broader autism phenotype as assessed by the Autism Spectrum Quotient (AQ). *Personality and Individual Differences.* 2005;38:451-460.
43. Hoekstra RA, Bartels M, Cath DC, Boomsma DI. Factor structure, reliability and criterion validity of the Autism-Spectrum Quotient (AQ): a study in Dutch population and patient groups. *J Autism Dev Disord.* 2008;38:1555-1566.
44. Stewart ME, Austin EJ. The structure of the Autism-Spectrum Quotient (AQ): Evidence from a student sample in Scotland. *Personality and Individual Differences.* 2009;47:224-228.
45. Lau WY, Gau SS, Chiu YN, Wu YY. Autistic traits in couple dyads as a predictor of anxiety spectrum symptoms. *J Autism Dev Disord.* 2014;44:2949-2963. doi: 2910.1007/s10803-10014-12151-10805.
46. Huang WL, Chen TT, Chen IM, Chang LR, Lin YH, Liao SC, Gau SS. Harm avoidance and persistence are associated with somatoform disorder psychopathology: A study in Taiwan. *J Affect Disord.* 2016;196:83-6.:10.1016/j.jad.2016.1002.1009. Epub 2016 Feb 1010.
47. Chen YL, Chen SH, Gau SS. ADHD and autistic traits, family function, parenting style,

- and social adjustment for Internet addiction among children and adolescents in Taiwan: A longitudinal study. *Res Dev Disabil.* 2015;39C:20-31.:10.1016/j.ridd.2014.1012.1025.
48. Kuo C-C, Liang K-C, Tseng CC, Gau SS-F. Comparison of the cognitive profiles and social adjustment between mathematically and scientifically talented students and students with Asperger's syndrome. *Research in Autism Spectrum Disorders.* 2014;8:838-850.
49. Bussing R, Fernandez M, Harwood M, Wei H, Garvan CW, Eyberg SM, Swanson JM. Parent and teacher SNAP-IV ratings of attention deficit hyperactivity disorder symptoms: psychometric properties and normative ratings from a school district sample. *Assessment.* 2008;15:317-328.
50. Gau SS, Shang CY, Liu SK, Lin CH, Swanson JM, Liu YC, Tu CL. Psychometric properties of the Chinese version of the Swanson, Nolan, and Pelham, version IV scale - parent form. *Int J Methods Psychiatr Res.* 2008;17:35-44.
51. Gau SS, Lin CH, Hu FC, Shang CY, Swanson JM, Liu YC, Liu SK. Psychometric properties of the Chinese version of the Swanson, Nolan, and Pelham, version IV Scale - Teacher Form. *J Pediatr Psychol.* 2009;34:850-861.
52. Gau SS, Chen SJ, Chou WJ, Cheng H, Tang CS, Chang HL, Tzang RF, Wu YY, Huang YF, Chou MC, Liang HY, Hsu YC, Lu HH, Huang YS. National survey of adherence, efficacy, and side effects of methylphenidate in children with attention-deficit/hyperactivity disorder in Taiwan. *J Clin Psychiatry.* 2008;69:131-140.
53. Chou WJ, Chou MC, Tzang RF, Hsu YC, Gau SS, Chen SJ, Wu YY, Huang YF, Liang HY, Cheng H. Better efficacy for the osmotic release oral system methylphenidate among poor adherents to immediate-release methylphenidate in the three ADHD subtypes. *Psychiatry Clin Neurosci.* 2009;63:167-175.
54. Gau SS, Shang CY. Improvement of executive functions in boys with attention deficit hyperactivity disorder: an open-label follow-up study with once-daily atomoxetine. *Int J Neuropsychopharmacol.* 2010;13:243-256.
55. Chen YY, Chen YL, Gau SS. Attention-deficit hyperactivity disorder and suicidality: The mediating effects of psychiatric comorbidities and family function. *J Affect Disord.* 2019;242:96-104.:10.1016/j.jad.2018.1008.1023. Epub 2018 Aug 1024.
56. Chiang MC, Gau SS. Validation of attention-deficit-hyperactivity disorder subtypes among Taiwanese children using neuropsychological functioning. *Aust N Z J Psychiatry.* 2008;42:526-535.
57. Liu ST, Tsai FJ, Lee WT, Lee CM, Fan PC, Lin WS, Chiu YN, Gau SS. Attentional processes and ADHD-related symptoms in pediatric patients with epilepsy. *Epilepsy Res.* 2011;93:53-65.
58. Tsai FJ, Liu ST, Lee CM, Lee WT, Fan PC, Lin WS, Chiu YN, Gau SS. ADHD-related

- symptoms, emotional/behavioral problems, and physical conditions in Taiwanese children with epilepsy. *J Formos Med Assoc.* 2013;112:396-405. doi: 310.1016/j.jfma.2011.1008.1022. Epub 2012 May 1011.
59. Chien Y-L, Gau SS-F, Chiu Y-N, Tsai W-C, Shang C-Y, Wu Y-Y. Impaired sustained attention, focused attention, and vigilance in youths with autistic disorder and Asperger's disorder. *Research in Autism Spectrum Disorders.* 2014;8:881-889.
  60. Shang CY, Wu YH, Gau SS, Tseng WY. Disturbed microstructural integrity of the frontostriatal fiber pathways and executive dysfunction in children with attention deficit hyperactivity disorder. *Psychol Med.* 2013;43:1093-1107.
  61. Yang HN, Tai YM, Yang LK, Gau SS. Prediction of childhood ADHD symptoms to quality of life in young adults: adult ADHD and anxiety/depression as mediators. *Res Dev Disabil.* 2013;34:3168-3181. doi: 3110.1016/j.ridd.2013.3106.3011. Epub 2013 Jul 3122.
  62. Chiang HL, Chen YJ, Lo YC, Tseng WY, Gau SS. Altered white matter tract property related to impaired focused attention, sustained attention, cognitive impulsivity and vigilance in attention-deficit/ hyperactivity disorder. *J Psychiatry Neurosci.* 2015;40:325-335.
  63. Shang CY, Pan YL, Lin HY, Huang LW, Gau SS. An Open-Label, Randomized Trial of Methylphenidate and Atomoxetine Treatment in Children with Attention-Deficit/Hyperactivity Disorder. *J Child Adolesc Psychopharmacol.* 2015;29:29.
  64. Chiang HL, Chen YJ, Shang CY, Tseng WY, Gau SS. Different neural substrates for executive functions in youths with ADHD: a diffusion spectrum imaging tractography study. *Psychol Med.* 2016;46:1225-1238. doi: 1210.1017/S0033291715002767. Epub 0033291715002016 Jan 0033291715002768.
  65. Bolte S, Poustka F, Constantino JN. Assessing autistic traits: cross-cultural validation of the social responsiveness scale (SRS). *Autism Res.* 2008;1:354-363.
  66. Constantino JN, Davis SA, Todd RD, Schindler MK, Gross MM, Brophy SL, Metzger LM, Shoushtari CS, Splinter R, Reich W. Validation of a Brief Quantitative Measure of Autistic Traits: Comparison of the Social Responsiveness Scale with the Autism Diagnostic Interview-Revised. *Journal of Autism and Developmental Disorders.* 2003;33:427-433.
  67. McGee RA, Clark SE, Symons DK. Does the Conners' Continuous Performance Test Aid in ADHD Diagnosis? *Journal of Abnormal Child Psychology.* 2000;28:415-424.
  68. J. Fray P, W. Robbins T, J. Sahakian B. Neuropsychiatric applications of CANTAB. *International Journal of Geriatric Psychiatry.* 1996;11:329-336.
  69. Owen AM, Iddon JL, Hodges JR, Summers BA, Robbins TW. Spatial and non-spatial working memory at different stages of Parkinson's disease. *Neuropsychologia.* 1997;35:519-532.
  70. Soares FC, de Oliveira TCG, de Macedo LDeD, Tomás AM, Picanço-Diniz DLW, Bento-Torres J, Bento-Torres NVO, Picanço-Diniz CW. CANTAB object recognition and language

- tests to detect aging cognitive decline: an exploratory comparative study. *Clin Interv Aging*. 2014;10:37-48.
71. Luciana M, Lindeke L, Georgieff M, Mills M, Nelson CA. Neurobehavioral evidence for working-memory deficits in school-aged children with histories of prematurity. *Developmental Medicine & Child Neurology*. 1999;41:521-533.
  72. Luciana M, Nelson CA. Assessment of Neuropsychological Function Through Use of the Cambridge Neuropsychological Testing Automated Battery: Performance in 4- to 12-Year-Old Children. *Developmental Neuropsychology*. 2002;22:595-624.
  73. Reese TG, Heid O, Weisskoff RM, Wedeen VJ. Reduction of eddy-current-induced distortion in diffusion MRI using a twice-refocused spin echo. *Magnetic Resonance in Medicine*. 2002;49:177-182.
  74. Kuo L-W, Chen J-H, Wedeen VJ, Tseng W-YI. Optimization of diffusion spectrum imaging and q-ball imaging on clinical MRI system. *NeuroImage*. 2008;41:7-18.
  75. Yendiki A, Koldewyn K, Kakunoori S, Kanwisher N, Fischl B. Spurious group differences due to head motion in a diffusion MRI study. *NeuroImage*. 2014;88:79-90.
  76. Pipe J: Pulse Sequences for Diffusion-Weighted MRI. in *Diffusion MRI 2014*. pp. 11-34.
  77. Dietrich O, Raya José G, Reeder Scott B, Reiser Maximilian F, Schoenberg Stefan O. Measurement of signal-to-noise ratios in MR images: Influence of multichannel coils, parallel imaging, and reconstruction filters. *Journal of Magnetic Resonance Imaging*. 2007;26:375-385.
  78. Avram AV, Sarlls JE, Barnett AS, Ozarslan E, Thomas C, Irfanoglu MO, Hutchinson E, Pierpaoli C, Basser PJ. Clinical feasibility of using mean apparent propagator (MAP) MRI to characterize brain tissue microstructure. *Neuroimage*. 2016;127:422-434.
  79. Özarslan E, Koay CG, Basser PJ: Simple Harmonic Oscillator Based Reconstruction and Estimation for One-Dimensional q-Space Magnetic Resonance (1D-SHORE). in *Excursions in Harmonic Analysis, Volume 2: The February Fourier Talks at the Norbert Wiener Center*. Edited by Andrews TD, Balan R, Benedetto JJ, Czaja W, Okoudjou KA. Boston, Birkhäuser Boston; 2013. pp. 373-399.
  80. Özarslan E, Koay CG, Shepherd TM, Komlosh ME, İrfanoğlu MO, Pierpaoli C, Basser PJ. Mean Apparent Propagator (MAP) MRI: a novel diffusion imaging method for mapping tissue microstructure. *NeuroImage*. 2013;78:16-32.
  81. Seunarine KK, Alexander DC: Chapter 6 - Multiple Fibers: Beyond the Diffusion Tensor. in *Diffusion MRI (Second Edition)*. San Diego, Academic Press; 2014. pp. 105-123.
  82. Alexander AL, Hurley SA, Samsonov AA, Adluru N, Hosseinbor AP, Mossahebi P, Tromp DPM, Zakszewski E, Field AS. Characterization of Cerebral White Matter Properties Using Quantitative Magnetic Resonance Imaging Stains. *Brain Connectivity*. 2011;1:423-446.
  83. Beaulieu C: Chapter 8 - The Biological Basis of Diffusion Anisotropy. in *Diffusion MRI*



- (Second Edition). San Diego, Academic Press; 2014. pp. 155-183.
84. Alexander AL, Lee JE, Lazar M, Field AS. Diffusion Tensor Imaging of the Brain. *Neurotherapeutics : the journal of the American Society for Experimental NeuroTherapeutics*. 2007;4:316-329.
  85. Aung WY, Mar S, Benzinger TLS. Diffusion tensor MRI as a biomarker in axonal and myelin damage. *Imaging in medicine*. 2013;5:427-440.
  86. Hsu Y-C, Hsu C-H, Tseng W-YI. A large deformation diffeomorphic metric mapping solution for diffusion spectrum imaging datasets. *NeuroImage*. 2012;63:818-834.
  87. Yeh F-C, Verstynen TD, Wang Y, Fernández-Miranda JC, Tseng W-YI. Deterministic Diffusion Fiber Tracking Improved by Quantitative Anisotropy. *PLOS ONE*. 2013;8:e80713.
  88. Tzourio-Mazoyer N, Landeau B, Papathanassiou D, Crivello F, Etard O, Delcroix N, Mazoyer B, Joliot M. Automated anatomical labeling of activations in SPM using a macroscopic anatomical parcellation of the MNI MRI single-subject brain. *Neuroimage*. 2002;15:273-289.
  89. Ashburner J, Friston KJ. Diffeomorphic registration using geodesic shooting and Gauss–Newton optimisation. *NeuroImage*. 2011;55:954-967.
  90. Smith SM, Jenkinson M, Johansen-Berg H, Rueckert D, Nichols TE, Mackay CE, Watkins KE, Ciccarelli O, Cader MZ, Matthews PM, Behrens TEJ. Tract-based spatial statistics: Voxelwise analysis of multi-subject diffusion data. *NeuroImage*. 2006;31:1487-1505.
  91. Yeatman JD, Dougherty RF, Myall NJ, Wandell BA, Feldman HM. Tract Profiles of White Matter Properties: Automating Fiber-Tract Quantification. *PLOS ONE*. 2012;7:e49790.
  92. Chen Y-J, Lo Y-C, Hsu Y-C, Fan C-C, Hwang T-J, Liu C-M, Chien Y-L, Hsieh MH, Liu C-C, Hwu H-G, Tseng W-YI. Automatic whole brain tract-based analysis using predefined tracts in a diffusion spectrum imaging template and an accurate registration strategy. *Human Brain Mapping*. 2015;36:3441-3458.
  93. Hunter JD. Matplotlib: A 2D Graphics Environment. *Computing in Science & Engineering*. 2007;9:90-95.
  94. Jones E, Oliphant T, Peterson P: SciPy: Open source scientific tools for Python. 2011.
  95. McKinney W: Data Structures for Statistical Computing in Python. in *Proceedings of the 9th Python in Science Conference 2010*. pp. 51-56.
  96. Oliphant TE. Python for Scientific Computing. *Computing in Science & Engineering*. 2007;9:10-20.
  97. Pedregosa F, Varoquaux G, Gramfort A, Michel V, Thirion B, Grisel O, Blondel M, Prettenhofer P, Weiss R, Dubourg V, Vanderplas J, Passos A, Cournapeau D, Brucher M, Perrot M, Duchesnay E. Scikit-learn: Machine Learning in Python. *Journal of Machine Learning Research*. 2011;12:2825 - 2830.
  98. Pérez F, Granger BE. IPython: A System for Interactive Scientific Computing. *Computing*

in Science & Engineering. 2007;9:21-29.

99. Seabold S, Perktold J: Statsmodels: Econometric and statistical modeling with python. in Proceedings of the 9th Python in Science Conference 2010.
100. González I, Déjean S, Martin PGP, Baccini A. CCA: An R Package to Extend Canonical Correlation Analysis. 2008. 2008;23:14 %J Journal of Statistical Software.
101. Miller KL, Alfaro-Almagro F, Bangerter NK, Thomas DL, Yacoub E, Xu J, Bartsch AJ, Jbabdi S, Sotiropoulos SN, Andersson JL, Griffanti L, Douaud G, Okeell TW, Weale P, Dragonu I, Garratt S, Hudson S, Collins R, Jenkinson M, Matthews PM, Smith SM. Multimodal population brain imaging in the UK Biobank prospective epidemiological study. *Nature neuroscience*. 2016;19:1523-1536.
102. González I, Déjean S, Martin PGP, Baccini A. CCA: An R Package to Extend Canonical Correlation Analysis. *Journal of Statistical Software*; Vol 1, Issue 12 (2008). 2008.
103. González I, Déjean S: CCA: Canonical correlation analysis. 2012.
104. Menzel U: CCP: Significance Tests for Canonical Correlation Analysis (CCA). 2012.
105. Bernal B, Ardila A. The role of the arcuate fasciculus in conduction aphasia. *Brain*. 2009;132:2309-2316.
106. de Schotten MT, Dell'Acqua F, Forkel SJ, Simmons A, Vergani F, Murphy DGM, Catani M. A lateralized brain network for visuospatial attention. *Nature neuroscience*. 2011;14:1245.
107. Kamali A, Flanders AE, Brody J, Hunter JV, Hasan KM. Tracing superior longitudinal fasciculus connectivity in the human brain using high resolution diffusion tensor tractography. *Brain structure & function*. 2014;219:269-281.
108. Budisavljevic S, Dell'Acqua F, Djordjilovic V, Miotto D, Motta R, Castiello U. The role of the frontal aslant tract and premotor connections in visually guided hand movements. *NeuroImage*. 2017;146:419-428.
109. Yeatman JD, Weiner KS, Pestilli F, Rokem A, Mezer A, Wandell BA. The vertical occipital fasciculus: A century of controversy resolved by in vivo measurements. *Proceedings of the National Academy of Sciences*. 2014;111:E5214.
110. Bubb EJ, Metzler-Baddeley C, Aggleton JP. The cingulum bundle: Anatomy, function, and dysfunction. *Neuroscience and biobehavioral reviews*. 2018;92:104-127.
111. Lawes INC, Barrick TR, Murugam V, Spierings N, Evans DR, Song M, Clark CA. Atlas-based segmentation of white matter tracts of the human brain using diffusion tensor tractography and comparison with classical dissection. *NeuroImage*. 2008;39:62-79.
112. Kamali A, Yousem DM, Lin DD, Sair HI, Jasti SP, Keser Z, Riascos RF, Hasan KM. Mapping the trajectory of the stria terminalis of the human limbic system using high spatial resolution diffusion tensor tractography. *Neuroscience Letters*. 2015;608:45-50.
113. Papagno C, Miracapillo C, Casarotti A, Romero Lauro LJ, Castellano A, Falini A,

- Casaceli G, Fava E, Bello L. What is the role of the uncinate fasciculus? Surgical removal and proper name retrieval. *Brain*. 2011;134:405-414.
114. Von Der Heide RJ, Skipper LM, Klobusicky E, Olson IR. Dissecting the uncinate fasciculus: disorders, controversies and a hypothesis. *Brain*. 2013;136:1692-1707.
115. Almairac F, Herbet G, Moritz-Gasser S, de Champfleury NM, Duffau H. The left inferior fronto-occipital fasciculus subserves language semantics: a multilevel lesion study. *Brain Structure and Function*. 2015;220:1983-1995.
116. Mandonnet E, Nouet A, Gatignol P, Capelle L, Duffau H. Does the left inferior longitudinal fasciculus play a role in language? A brain stimulation study. *Brain*. 2007;130:623-629.
117. Haber SN. Corticostriatal circuitry. *Dialogues in clinical neuroscience*. 2016;18:7-21.
118. Wakana S, Jiang H, Nagae-Poetscher LM, van Zijl PCM, Mori S. Fiber Tract-based Atlas of Human White Matter Anatomy. *Radiology*. 2004;230:77-87.
119. Bürgel U, Amunts K, Hoemke L, Mohlberg H, Gilsbach JM, Zilles K. White matter fiber tracts of the human brain: Three-dimensional mapping at microscopic resolution, topography and intersubject variability. *NeuroImage*. 2006;29:1092-1105.
120. Gau SS-F, Shang C-Y. Executive functions as endophenotypes in ADHD: evidence from the Cambridge Neuropsychological Test Battery (CANTAB). *Journal of Child Psychology and Psychiatry*. 2010;51:838-849.
121. Cacciamani F, Salvadori N, Eusebi P, Lisetti V, Luchetti E, Calabresi P, Parnetti L. Evidence of practice effect in CANTAB spatial working memory test in a cohort of patients with mild cognitive impairment. *Applied Neuropsychology: Adult*. 2018;25:237-248.
122. Wilks SS. On the Independence of  $k$  Sets of Normally Distributed Statistical Variables. *Econometrica*. 1935;3:309-326.
123. Wang HT, Smallwood J, Mourao-Miranda J, Xia CH, Satterthwaite TD, Bassett DS, Bzdok D. Finding the needle in a high-dimensional haystack: Canonical correlation analysis for neuroscientists. *Neuroimage*. 2020;216:116745.
124. Dick AS, Garic D, Graziano P, Tremblay P. The frontal aslant tract (FAT) and its role in speech, language and executive function. *Cortex*. 2019;111:148-163.
125. Cohen RA, Kaplan RF, Moser DJ, Jenkins MA, Wilkinson H. Impairments of attention after cingulotomy. *Neurology*. 1999;53:819.
126. Choi SH, Kim YB, Paek SH, Cho ZH. Papez Circuit Observed by in vivo Human Brain With 7.0T MRI Super-Resolution Track Density Imaging and Track Tracing. *Front Neuroanat*. 2019;13:17.
127. Catani M, Dell'Acqua F, Thiebaut de Schotten M. A revised limbic system model for memory, emotion and behaviour. *Neuroscience & Biobehavioral Reviews*. 2013;37:1724-1737.

128. Herbet G, Zemmoura I, Duffau H. Functional Anatomy of the Inferior Longitudinal Fasciculus: From Historical Reports to Current Hypotheses. *Frontiers in Neuroanatomy*. 2018;12:77.
129. Friederici AD, Gierhan SME. The language network. *Current Opinion in Neurobiology*. 2013;23:250-254.
130. Just MA, Cherkassky VL, Keller TA, Kana RK, Minshew NJ. Functional and anatomical cortical underconnectivity in autism: evidence from an fMRI study of an executive function task and corpus callosum morphometry. *Cereb Cortex*. 2007;17:951-961.
131. Klarborg B, Madsen K, Vestergaard M, Skimminge A, Jernigan T, Baaré W. Sustained attention is associated with right superior longitudinal fasciculus and superior parietal white matter microstructure in children. *Human brain mapping*. 2013;34.
132. Glahn DC, Kim J, Cohen MS, Poutanen VP, Therman S, Bava S, Van Erp TGM, Manninen M, Huttunen M, Lönnqvist J, Standertskjöld-Nordenstam CG, Cannon TD. Maintenance and Manipulation in Spatial Working Memory: Dissociations in the Prefrontal Cortex. *NeuroImage*. 2002;17:201-213.
133. Takeuchi H, Sekiguchi A, Taki Y, Yokoyama S, Yomogida Y, Komuro N, Yamanouchi T, Suzuki S, Kawashima R. Training of Working Memory Impacts Structural Connectivity. *The Journal of Neuroscience*. 2010;30:3297.
134. Craig F, Lamanna AL, Margari F, Matera E, Simone M, Margari L. Overlap Between Autism Spectrum Disorders and Attention Deficit Hyperactivity Disorder: Searching for Distinctive/Common Clinical Features. *Autism research : official journal of the International Society for Autism Research*. 2015;8:328-337.
